# Supplementary material for: Chicken rRNA Gene Cluster Structure
Source: PubMed Central journal article supplement (PMC4907446; doi:10.1371/journal.pone.0157464), 2016-06-14
Supplement: pone.0157464.s004.pdf [file pone.0157464.s004.pdf]

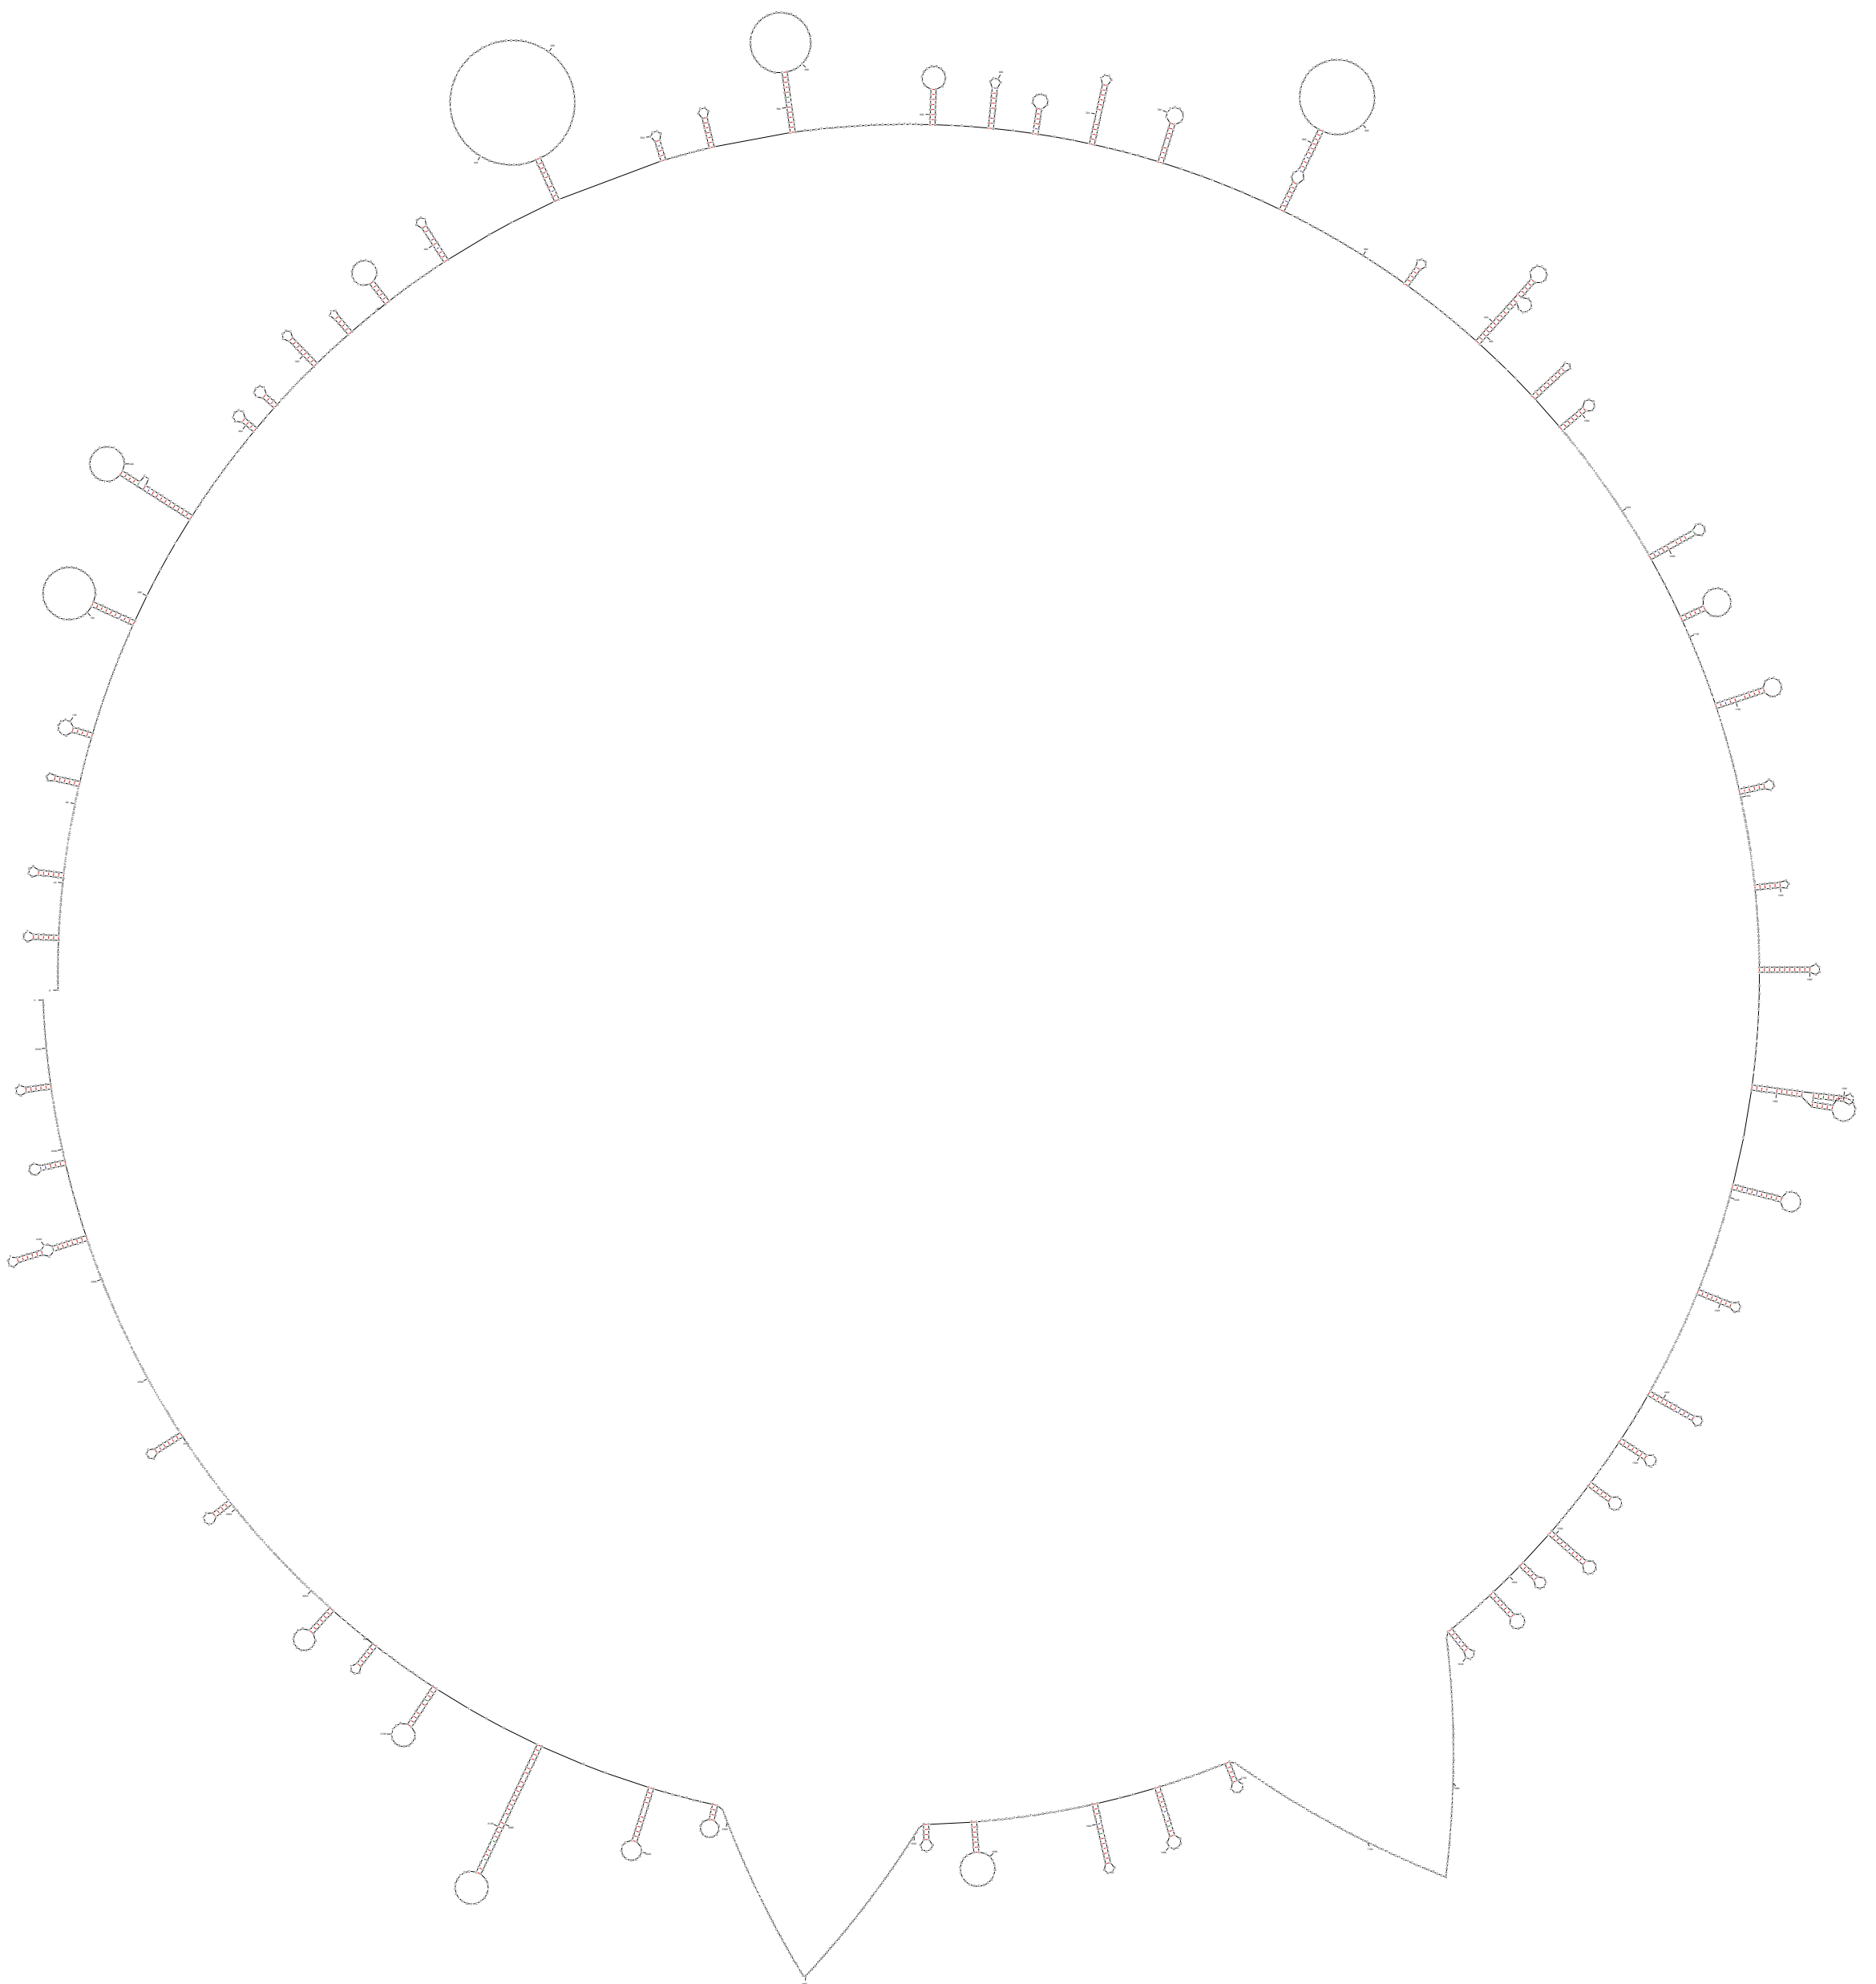

$dG = -183.23$  16Feb08-06-54-32
