# Supplementary material for: Chicken rRNA Gene Cluster Structure
Source: PubMed Central journal article supplement (PMC4907446; doi:10.1371/journal.pone.0157464), 2016-06-14
Supplement: pone.0157464.s007.pdf [file pone.0157464.s007.pdf]

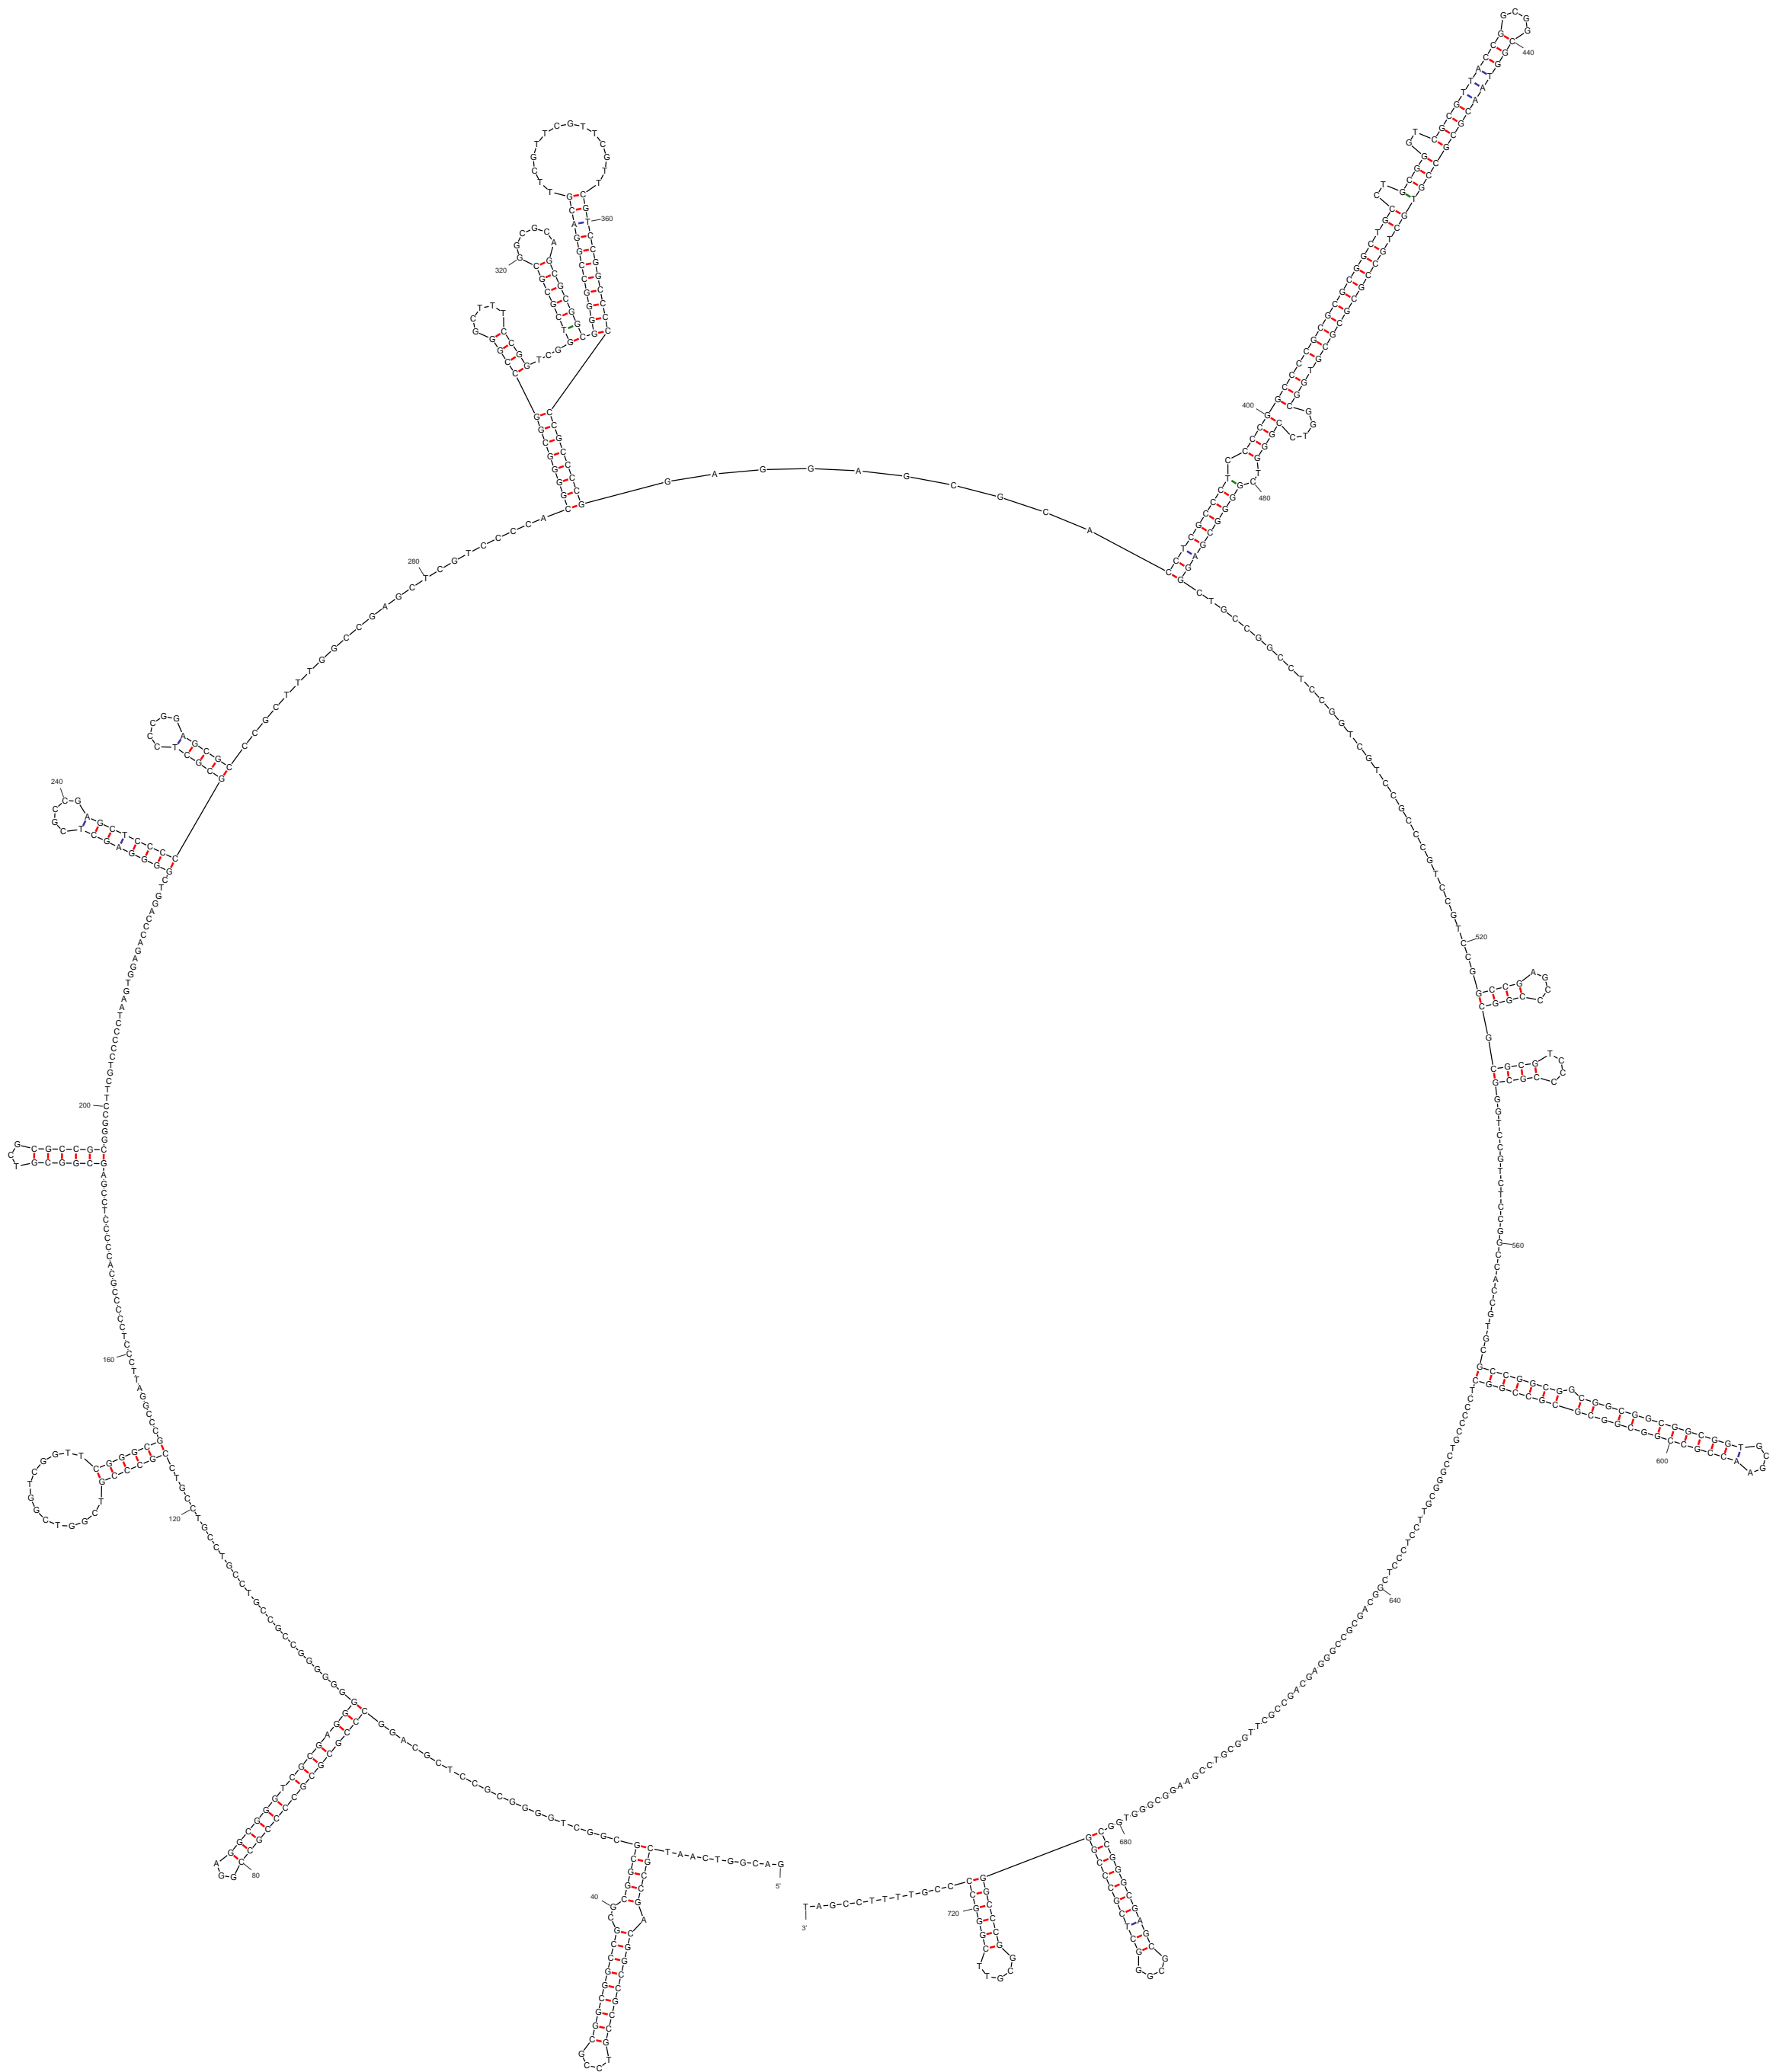

$dG = -62.50$  15Jun26-06-44-58-68f87804f8
