# Supplementary material for: Chicken rRNA Gene Cluster Structure
Source: PubMed Central journal article supplement (PMC4907446; doi:10.1371/journal.pone.0157464), 2016-06-14
Supplement: pone.0157464.s010.pdf [file pone.0157464.s010.pdf]

**S1 Table**

**Raw read assembly verification using WGS contigs and annotated sequences**

|                          | 1          | 1111111112 | 2222222223 | 3333333334 | 4444444445 | 5555555556 | 6666666667 | 7777777778 | 8888888889 | 9999999990 | 0000000001 | 1111111111 |
|--------------------------|------------|------------|------------|------------|------------|------------|------------|------------|------------|------------|------------|------------|
|                          | 1234567890 | 1234567890 | 1234567890 | 1234567890 | 1234567890 | 1234567890 | 1234567890 | 1234567890 | 1234567890 | 1234567890 | 1234567890 | 1234567890 |
| AADN03001677             | -----      | -----      | -----      | -----      | -----      | -----      | -----      | -----      | -----      | -----      | -----      | -----      |
| AADN03001778             | -----      | -----      | -----      | -----      | -----      | -----      | -----      | AGGACTCGGC | TCCGGTAGTG | GCGGTGAGCG | GGCGCTCGCG | -----      |
| AADN03001785             | -----      | -----      | -----      | -----      | -----      | -----      | -----      | -----      | -----      | -----      | -----      | -----      |
| AADN03001786             | -----      | -----      | -----      | -----      | -----      | -----      | -----      | -----      | -----      | -----      | -----      | -----      |
| AADN03001788             | -----      | -----      | -----      | -----      | -----      | -----      | -----      | -----      | -----      | -----      | -----      | -----      |
| AADN03014081             | GGTAGTCGGC | GCCTATGGGA | CTAGAACGTT | TTTTTCGGAT | GCCTTATATG | TTCGTCTGTA | GGAGCGAGTG | AGGACTCGGC | TCCAAGGGTG | GCGGTGAGCG | GGCGCTCG-- | -----      |
| AADN03015064             | GGTAGTCGGC | GCCTATGGGA | CTAGAACGTT | TTTTTCGGAT | GCCTTATATG | TTCGTCTGTA | GGAGCGAGTG | AGGACTCGGC | TCCGGTAGTG | GCGGTGAGCG | GGCGCTCGCG | -----      |
| AADN03026634             | -----      | -----      | -----      | -----      | -----      | -----      | -----      | -----      | -----      | -----      | -----      | -----      |
| NW_003775878             | GGTAGTCGGC | GCCTATGGGA | CTAGAACGTT | TTTTTCGGAT | GCCTTATATG | TTCGTCTGTA | GGAGCGAGTG | AGGACTCGGC | TCCGGTAGTG | GCGGTGAGCG | GGCGCTCGCG | -----      |
| DQ018752                 | -----      | -----      | -----      | -----      | -----      | -----      | -----      | -----      | -----      | -----      | -----      | -----      |
| DQ018757                 | -----      | -----      | -----      | -----      | -----      | -----      | -----      | -----      | -----      | -----      | -----      | -----      |
| DQ112354                 | GGTAGTCGGC | GCCTATGGGG | CTAGAACGTT | TTTTTCGGAT | GCCTTATATG | TTCGTCTGTA | GGAGCGAGTG | AGGACTCGGC | TCCGGTAGTG | GCGGTGAGCG | GGCGCTCGCG | -----      |
| FM165414                 | -----      | -----      | -----      | -----      | -----      | -----      | -----      | -----      | -----      | -----      | -----      | -----      |
| FM165415                 | -----      | -----      | -----      | -----      | -----      | -----      | -----      | -----      | -----      | -----      | -----      | -----      |
| AADN03000430             | -----      | -----      | -----      | -----      | -----      | -----      | -----      | -----      | -----      | -----      | -----      | -----      |
| AADN03001784             | -----      | -----      | -----      | -----      | -----      | -----      | -----      | -----      | -----      | -----      | -----      | -----      |
| AADN03001783             | -----      | -----      | -----      | -----      | -----      | -----      | -----      | -----      | -----      | -----      | -----      | -----      |
| DQ018754                 | -----      | -----      | -----      | -----      | -----      | -----      | -----      | -----      | -----      | -----      | -----      | -----      |
| AADN03001782             | -----      | -----      | -----      | -----      | -----      | -----      | -----      | -----      | -----      | -----      | -----      | -----      |
| JN639848                 | -----      | -----      | -----      | -----      | -----      | -----      | -----      | -----      | -----      | -----      | -----      | -----      |
| AADN03001670             | -----      | -----      | -----      | -----      | -----      | -----      | -----      | -----      | -----      | -----      | -----      | -----      |
| HQ873432                 | -----      | -----      | -----      | -----      | -----      | -----      | -----      | -----      | -----      | -----      | -----      | -----      |
| AADN03001774             | -----      | -----      | -----      | -----      | -----      | -----      | -----      | -----      | -----      | -----      | -----      | -----      |
| AADN03001775             | -----      | -----      | -----      | -----      | -----      | -----      | -----      | -----      | -----      | -----      | -----      | -----      |
| EF552813                 | -----      | -----      | -----      | -----      | -----      | -----      | -----      | -----      | -----      | -----      | -----      | -----      |
| AADN03022685             | -----      | -----      | -----      | -----      | -----      | -----      | -----      | -----      | -----      | -----      | -----      | -----      |
| AADN03019346             | -----      | -----      | -----      | -----      | -----      | -----      | -----      | -----      | -----      | -----      | -----      | -----      |
| AADN03001776             | -----      | -----      | -----      | -----      | -----      | -----      | -----      | -----      | -----      | -----      | -----      | -----      |
| DQ018756                 | -----      | -----      | -----      | -----      | -----      | -----      | -----      | -----      | -----      | -----      | -----      | -----      |
| AF173612                 | -----      | -----      | -----      | -----      | -----      | -----      | -----      | -----      | -----      | -----      | -----      | -----      |
| Gallus_gallus_KT445934.2 | GGTAGTCGGC | GCCTATGGGG | CTAGAACGTT | TTTTTCGGAT | GCCTTATATG | TTCGTCTGTA | GGAGCGAGTG | AGGACTCGGC | TCCGGTAGTG | GCGGTGAGCG | GGCGCTCGCG | -----      |
|                          | 1111111111 | 1111111111 | 1111111111 | 1111111111 | 1111111111 | 1111111111 | 1111111111 | 1111111111 | 1111111111 | 1111111112 | 2222222222 | 2222222222 |
|                          | 1234567890 | 1234567890 | 1234567890 | 1234567890 | 1234567890 | 1234567890 | 1234567890 | 1234567890 | 1234567890 | 1234567890 | 1234567890 | 1234567890 |
| AADN03001677             | -----      | -----      | -----      | -----      | -----      | -----      | -----      | -----      | -----      | -----      | -----      | -----      |
| AADN03001778             | AGCAGGGTTG | ACCGGCCGGC | CGCCTAGAGA | GGGGA--GTC | GGCGGCGGCG | GCGGCGGCTT | TCTCGGGCAT | CGGTTCGTTC | GATCGGTCCG | GTCGCTTCGG | TTTGTCGGTC | -----      |
| AADN03001785             | -----      | -----      | -----      | -----      | -----      | -----      | -----      | -----      | -----      | -----      | -----      | -----      |
| AADN03001786             | -----      | -----      | -----      | -----      | -----      | -----      | -----      | -----      | -----      | -----      | -----      | -----      |
| AADN03001788             | -----      | -----      | -----      | -----      | -----      | -----      | -----      | -----      | -----      | -----      | -----      | -----      |
| AADN03014081             | -----      | -----      | -----      | -----      | -----      | -----      | -----      | -----      | -----      | -----      | -----      | -----      |
| AADN03015064             | AGCAGGGTTG | ACCGGCCGGC | CGCCTAGAGA | GGGGATCGGC | GGGGGCGGCG | GCGGCGGCTT | TCTCGGGCAT | CGGTTCGTTC | GATCGGTCCG | GTCGCTTCGG | TTTGTCGGTC | -----      |
| AADN03026634             | -----      | -----      | -----      | -----      | -----      | -----      | -----      | -----      | -----      | -----      | -----      | -----      |
| NW_003775878             | AGCAGGGTTG | ACCGGCCGGC | CGCCTAGAGA | GGGGATCGGC | GGGGGCGGCG | GCGGCGGCTT | TCTCGGGCAT | CGGTTCGTTC | GATCGGTCCG | GTCGCTTCGG | TTTGTCGGTC | -----      |
| DQ018752                 | -----      | -----      | -----      | -----      | -----      | -----      | -----      | -----      | -----      | -----      | -----      | -----      |
| DQ018757                 | -----      | -----      | -----      | -----      | -----      | -----      | -----      | -----      | -----      | -----      | -----      | -----      |
| DQ112354                 | AGCAGGGTTG | ACCGGCCGGC | CGCCTAGAGA | GGGGATCGGC | GGCGGCGGCG | GCGGC---TT | TCTCGGGCAT | CGGTTCGTTC | GATCGGTCCG | GTCGCTTCGG | TTTGTCGGTC | -----      |
| FM165414                 | -----      | -----      | -----      | -----      | -----      | -----      | -----      | -----      | -----      | -----      | -----      | -----      |





|                          |            |            |            |            |            |            |            |            |            |            |            |            |
|--------------------------|------------|------------|------------|------------|------------|------------|------------|------------|------------|------------|------------|------------|
| DQ018754                 | -----      | -----      | -----      | -----      | -----      | -----      | -----      | -----      | -----      | -----      | -----      | -----      |
| AADN03001782             | -----      | -----      | -----      | -----      | -----      | -----      | -----      | -----      | -----      | -----      | -----      | -----      |
| JN639848                 | -----      | -----      | -----      | -----      | -----      | -----      | -----      | -----      | -----      | -----      | -----      | -----      |
| AADN03001670             | -----      | -----      | -----      | -----      | -----      | -----      | -----      | -----      | -----      | -----      | -----      | -----      |
| HQ873432                 | -----      | -----      | -----      | -----      | -----      | -----      | -----      | -----      | -----      | -----      | -----      | -----      |
| AADN03001774             | -----      | -----      | -----      | -----      | -----      | -----      | -----      | -----      | -----      | -----      | -----      | -----      |
| AADN03001775             | -----      | -----      | -----      | -----      | -----      | -----      | -----      | -----      | -----      | -----      | -----      | -----      |
| EF552813                 | -----      | -----      | -----      | -----      | -----      | -----      | -----      | -----      | -----      | -----      | -----      | -----      |
| AADN03022685             | -----      | -----      | -----      | -----      | -----      | -----      | -----      | -----      | -----      | -----      | -----      | -----      |
| AADN03019346             | -----      | -----      | -----      | -----      | -----      | -----      | -----      | -----      | -----      | -----      | -----      | -----      |
| AADN03001776             | -----      | -----      | -----      | -----      | -----      | -----      | -----      | -----      | -----      | -----      | -----      | -----      |
| DQ018756                 | -----      | -----      | -----      | -----      | -----      | -----      | -----      | -----      | -----      | -----      | -----      | -----      |
| AF173612                 | -----      | -----      | -----      | -----      | -----      | -----      | -----      | -----      | -----      | -----      | -----      | -----      |
| Gallus_gallus_KT445934.2 | GAGGGGGACC | CGGAGGTCGT | AGGTCGTGGC | GGCGTCGCCT | CGTCCTCCTT | TCGCACCGCA | TTCTCACCCG | CACGCGGGAG | CCCCGGCCGA | TTCGTGGCGC | TCCTCGGGCG | -----      |
|                          | 5555555555 | 5555555555 | 5555555555 | 5555555555 | 5555555556 | 6666666666 | 6666666666 | 6666666666 | 6666666666 | 6666666666 | 6666666666 | 6666666666 |
|                          | 5555555556 | 6666666667 | 7777777778 | 8888888889 | 9999999990 | 0000000001 | 1111111112 | 2222222223 | 3333333334 | 4444444445 | 5555555556 | 6666666667 |
|                          | 1234567890 | 1234567890 | 1234567890 | 1234567890 | 1234567890 | 1234567890 | 1234567890 | 1234567890 | 1234567890 | 1234567890 | 1234567890 | 1234567890 |
| AADN03001677             | -----      | -----      | -----      | -----      | -----      | -----      | -----      | -----      | -----      | -----      | -----      | -----      |
| AADN03001778             | CGTCGGGGAG | GCTTCCCGGC | GGGCCGGCTC | TATCCCGCTC | C-----     | -----      | -----      | -----      | -----      | -----      | -----      | -----      |
| AADN03001785             | -----      | -----      | -----      | -----      | -----      | -----      | -----      | -----      | -----      | -----      | -----      | -----      |
| AADN03001786             | -----      | -----      | -----      | -----      | -----      | -----      | -----      | -----      | -----      | -----      | -----      | -----      |
| AADN03001788             | -----      | -----      | -----      | -----      | -----      | -----      | -----      | -----      | -----      | -----      | -----      | -----      |
| AADN03014081             | -----      | -----      | -----      | -----      | -----      | -----      | -----      | -----      | -----      | -----      | -----      | -----      |
| AADN03015064             | CGTCGGGGAG | GCTTCCCGGC | GGGCCGGCTC | TATCCCGCTC | CCCGGCTCGT | TCGGGGTGGC | GTGGGGCGGG | CCGGTGTTCA | GGCACGGGCG | AGCACCTCTC | GTCGGACGTT | -----      |
| AADN03026634             | -----      | -----      | -----      | -----      | -----      | -----      | -----      | -----      | -----      | -----      | -----      | -----      |
| NW_003775878             | CGTCGGGGAG | GCTTCCCGGC | GGGCCGGCTC | TATCCCGCTC | CCCGGCTCGT | TCGGGGTGGC | GTGGGGCGGG | CCGGTGTTCA | GGCACGGGCG | AGCACCTCTC | GTCGGACGTT | -----      |
| DQ018752                 | -----      | -----      | -----      | -----      | -----      | -----      | -----      | -----      | -----      | -----      | -----      | -----      |
| DQ018757                 | -----      | -----      | -----      | -----      | -----      | -----      | -----      | -----      | -----      | -----      | -----      | -----      |
| DQ112354                 | -----      | -----      | -----      | -----      | -----      | -----      | -----      | -----      | -----      | -----      | -----      | -----      |
| FM165414                 | -----      | -----      | -----      | -----      | -----      | -----      | -----      | -----      | -----      | -----      | -----      | -----      |
| FM165415                 | -----      | -----      | -----      | -----      | -----      | -----      | -----      | -----      | -----      | -----      | -----      | -----      |
| AADN03000430             | -----      | -----      | -----      | -----      | -----      | -----      | -----      | -----      | -----      | -----      | -----      | -----      |
| AADN03001784             | -----      | -----      | -----      | -----      | -----      | -----      | -----      | -----      | -----      | -----      | -----      | -----      |
| AADN03001783             | -----      | -----      | -----      | -----      | -----      | -----      | -----      | -----      | -----      | -----      | -----      | -----      |
| DQ018754                 | -----      | -----      | -----      | -----      | -----      | -----      | -----      | -----      | -----      | -----      | -----      | -----      |
| AADN03001782             | -----      | -----      | -----      | -----      | -----      | -----      | -----      | -----      | -----      | -----      | -----      | -----      |
| JN639848                 | -----      | -----      | -----      | -----      | -----      | -----      | -----      | -----      | -----      | -----      | -----      | -----      |
| AADN03001670             | -----      | -----      | -----      | -----      | -----      | -----      | -----      | -----      | -----      | -----      | -----      | -----      |
| HQ873432                 | -----      | -----      | -----      | -----      | -----      | -----      | -----      | -----      | -----      | -----      | -----      | -----      |
| AADN03001774             | -----      | -----      | -----      | -----      | -----      | -----      | -----      | -----      | -----      | -----      | -----      | -----      |
| AADN03001775             | -----      | -----      | -----      | -----      | -----      | -----      | -----      | -----      | -----      | -----      | -----      | -----      |
| EF552813                 | -----      | -----      | -----      | -----      | -----      | -----      | -----      | -----      | -----      | -----      | -----      | -----      |
| AADN03022685             | -----      | -----      | -----      | -----      | -----      | -----      | -----      | -----      | -----      | -----      | -----      | -----      |
| AADN03019346             | -----      | -----      | -----      | -----      | -----      | -----      | -----      | -----      | -----      | -----      | -----      | -----      |
| AADN03001776             | -----      | -----      | -----      | -----      | -----      | -----      | -----      | -----      | -----      | -----      | -----      | -----      |
| DQ018756                 | -----      | -----      | -----      | -----      | -----      | -----      | -----      | -----      | -----      | -----      | -----      | -----      |
| AF173612                 | -----      | -----      | -----      | -----      | -----      | -----      | -----      | -----      | -----      | -----      | -----      | -----      |
| Gallus_gallus_KT445934.2 | CGTCGGGGAG | GCTTCCCGGC | GGGCCGGCTC | TATCCCGCTC | CCCGGCTCGT | TCGGGGTGGC | GTGGGGCGGG | CCGGTGTTCA | GGCACGGGCG | AGCACCTCTC | GTCGGACGTT | -----      |
|                          | 6666666666 | 6666666666 | 6666666666 | 6666666667 | 7777777777 | 7777777777 | 7777777777 | 7777777777 | 7777777777 | 7777777777 | 7777777777 | 7777777777 |
|                          | 6666666667 | 7777777778 | 8888888889 | 9999999990 | 0000000001 | 1111111112 | 2222222223 | 3333333334 | 4444444445 | 5555555556 | 6666666667 | 7777777778 |
|                          | 1234567890 | 1234567890 | 1234567890 | 1234567890 | 1234567890 | 1234567890 | 1234567890 | 1234567890 | 1234567890 | 1234567890 | 1234567890 | 1234567890 |
| AADN03001677             | -----      | -----      | -----      | -----      | -----      | -----      | -----      | -----      | -----      | -----      | -----      | -----      |
| AADN03001778             | -----      | -----      | -----      | -----      | -----      | -----      | -----      | -----      | -----      | -----      | -----      | -----      |













|                          |            |            |            |            |            |            |            |            |            |            |            |            |
|--------------------------|------------|------------|------------|------------|------------|------------|------------|------------|------------|------------|------------|------------|
| AADN03001776             | -----      | -----      | -----      | -----      | -----      | -----      | -----      | -----      | -----      | -----      | -----      | -----      |
| DQ018756                 | -----      | -----      | -----      | -----      | -----      | -----      | -----      | -----      | -----      | -----      | -----      | -----      |
| AF173612                 | -----      | -----      | -----      | -----      | -----      | -----      | -----      | -----      | -----      | -----      | -----      | -----      |
| Gallus_gallus_KT445934.2 | TCGTGGGGTC | GCGCCCGTCT | CGAGGTCGCG | TTCTCCTCTA | GCACGTCCGT | CTCCGGCGGC | GGGGCTTCGT | TTCCCCGTCC | GCTTCTCCGC | CGGTCCCGGA | GGGCGGGTCA |            |
|                          | 1111111111 | 1111111111 | 1111111111 | 1111111111 | 1111111111 | 1111111111 | 1111111111 | 1111111111 | 1111111111 | 1111111111 | 1111111111 | 1111111111 |
|                          | 5555555555 | 5555555555 | 5555555555 | 5555555555 | 5555555555 | 5555555556 | 6666666666 | 6666666666 | 6666666666 | 6666666666 | 6666666666 | 6666666666 |
|                          | 4444444445 | 5555555556 | 6666666667 | 7777777778 | 8888888889 | 9999999990 | 0000000001 | 1111111112 | 2222222223 | 3333333334 | 4444444445 |            |
|                          | 1234567890 | 1234567890 | 1234567890 | 1234567890 | 1234567890 | 1234567890 | 1234567890 | 1234567890 | 1234567890 | 1234567890 | 1234567890 | 1234567890 |
| AADN03001677             | -----      | -----      | -----      | -----      | -----      | -----      | -----      | -----      | -----      | -----      | -----      | -----      |
| AADN03001778             | -----      | -----      | -----      | -----      | -----      | -----      | -----      | -----      | -----      | -----      | -----      | -----      |
| AADN03001785             | -----      | -----      | -----      | -----      | -----      | -----      | -----      | -----      | -----      | -----      | -----      | -----      |
| AADN03001786             | -----      | -----      | -----      | -----      | -----      | -----      | -----      | -----      | -----      | -----      | -----      | -----      |
| AADN03001788             | -----      | -----      | -----      | -----      | -----      | -----      | -----      | -----      | -----      | -----      | -----      | -----      |
| AADN03014081             | -----      | -----      | -----      | -----      | -----      | -----      | -----      | -----      | -----      | -----      | -----      | -----      |
| AADN03015064             | -----      | -----      | -----      | -----      | -----      | -----      | -----      | -----      | -----      | -----      | -----      | -----      |
| AADN03026634             | -----      | -----      | -----      | -----      | -----      | -----      | -----      | -----      | -----      | -----      | -----      | -----      |
| NW_003775878             | NNNNNNNNNN | NNNNNNNNNN | NNNNNNNNNN | NNNNNNNNNN | NNNNNNNNNN | NNNNNNNNNN | NNNNNNNNNN | NNNNNNNNNN | NNNNNNNNNN | NNNNNNNNNN | NNNNNNNNNN | NNNNNNNNNN |
| DQ018752                 | -----      | -----      | -----      | -----      | -----      | -----      | -----      | -----      | -----      | -----      | -----      | -----      |
| DQ018757                 | -----      | -----      | -----      | -----      | -----      | -----      | -----      | -----      | -----      | -----      | -----      | -----      |
| DQ112354                 | -----      | -----      | -----      | -----      | -----      | -----      | -----      | -----      | -----      | -----      | -----      | -----      |
| FM165414                 | -----      | -----      | -----      | -----      | -----      | -----      | -----      | -----      | -----      | -----      | -----      | -----      |
| FM165415                 | -----      | -----      | -----      | -----      | -----      | -----      | -----      | -----      | -----      | -----      | -----      | -----      |
| AADN03000430             | -----      | -----      | -----      | -----      | -----      | -----      | -----      | -----      | -----      | -----      | -----      | -----      |
| AADN03001784             | -----      | -----      | -----      | -----      | -----      | -----      | -----      | -----      | -----      | -----      | -----      | -----      |
| AADN03001783             | -----      | -----      | -----      | -----      | -----      | -----      | -----      | -----      | -----      | -----      | -----      | -----      |
| DQ018754                 | -----      | -----      | -----      | -----      | -----      | -----      | -----      | -----      | -----      | -----      | -----      | -----      |
| AADN03001782             | -----      | -----      | -----      | -----      | -----      | -----      | -----      | -----      | -----      | -----      | -----      | -----      |
| JN639848                 | -----      | -----      | -----      | -----      | -----      | -----      | -----      | -----      | -----      | -----      | -----      | -----      |
| AADN03001670             | -----      | -----      | -----      | -----      | -----      | -----      | -----      | -----      | -----      | -----      | -----      | -----      |
| HQ873432                 | -----      | -----      | -----      | -----      | -----      | -----      | -----      | -----      | -----      | -----      | -----      | -----      |
| AADN03001774             | -----      | -----      | -----      | -----      | -----      | -----      | -----      | -----      | -----      | -----      | -----      | -----      |
| AADN03001775             | -----      | -----      | -----      | -----      | -----      | -----      | -----      | -----      | -----      | -----      | -----      | -----      |
| EF552813                 | -----      | -----      | -----      | -----      | -----      | -----      | -----      | -----      | -----      | -----      | -----      | -----      |
| AADN03022685             | -----      | -----      | -----      | -----      | -----      | -----      | -----      | -----      | -----      | -----      | -----      | -----      |
| AADN03019346             | -----      | -----      | -----      | -----      | -----      | -----      | -----      | -----      | -----      | -----      | -----      | -----      |
| AADN03001776             | -----      | -----      | -----      | -----      | -----      | -----      | -----      | -----      | -----      | -----      | -----      | -----      |
| DQ018756                 | -----      | -----      | -----      | -----      | -----      | -----      | -----      | -----      | -----      | -----      | -----      | -----      |
| AF173612                 | -----      | -----      | -----      | -----      | -----      | -----      | -----      | -----      | -----      | -----      | -----      | -----      |
| Gallus_gallus_KT445934.2 | GCCCCGCGC  | GCCGTGCGGC | GCGAGCGCGA | GTCCGGCTCC | CGCGGGGGG  | GCCCGGAGCG | TGCCGCCGAA | AGCAGCTGCG | CAGCGGTCCC | CGTCTCTCC  | CCGCGGGGG  |            |
|                          | 1111111111 | 1111111111 | 1111111111 | 1111111111 | 1111111111 | 1111111111 | 1111111111 | 1111111111 | 1111111111 | 1111111111 | 1111111111 | 1111111111 |
|                          | 6666666666 | 6666666666 | 6666666666 | 6666666666 | 6666666667 | 7777777777 | 7777777777 | 7777777777 | 7777777777 | 7777777777 | 7777777777 | 7777777777 |
|                          | 5555555556 | 6666666667 | 7777777778 | 8888888889 | 9999999990 | 0000000001 | 1111111112 | 2222222223 | 3333333334 | 4444444445 | 5555555556 |            |
|                          | 1234567890 | 1234567890 | 1234567890 | 1234567890 | 1234567890 | 1234567890 | 1234567890 | 1234567890 | 1234567890 | 1234567890 | 1234567890 | 1234567890 |
| AADN03001677             | -----      | -----      | -----      | -----      | -----      | -----      | -----      | -----      | -----      | -----      | -----      | -----      |
| AADN03001778             | -----      | -----      | -----      | -----      | -----      | -----      | -----      | -----      | -----      | -----      | -----      | -----      |
| AADN03001785             | -----      | -----      | -----      | -----      | -----      | -----      | -----      | -----      | -----      | -----      | -----      | -----      |
| AADN03001786             | -----      | -----      | -----      | -----      | -----CTC   | CGTCGTGGTC | GGCGAGCGAG | CGAGCGAGCG | AGGGAACGAC | GGAGGGCCGC | CCGCCCCGCC | GAGAGGCGTT |
| AADN03001788             | -----      | -----      | -----      | -----      | -----      | -----      | -----      | -----      | -----      | -----      | -----      | -----      |
| AADN03014081             | -----      | -----      | -----      | -----      | -----      | -----      | -----      | -----      | -----      | -----      | -----      | -----      |
| AADN03015064             | -----      | -----      | -----      | -----      | -----      | -----      | -----      | -----      | -----      | -----      | -----      | -----      |
| AADN03026634             | -----      | -----      | -----      | -----      | -----      | -----      | -----      | -----      | -----      | -----      | -----      | -----      |
| NW_003775878             | NNNNNNNNNN | NNNNNNNNNN | NNNNNNNNNN | NNNNNNNNNN | NNNNNNNNNN | NNNNNNNNNN | NNNNNNNNNN | NNNNNNNNNN | NNNNNNNNNN | NNNNNNNNNN | NNNNNNNNNN | NNNNNNNNNN |
| DQ018752                 | -----      | -----      | -----      | -----      | -----      | -----      | -----      | -----      | -----      | -----      | -----      | -----      |



```

AF173612
Gallus_gallus_KT445934.2  CGCCCCGGCG GCCGCCGCCG TCGACCCGGC AAGGGCCAGA CGGGAAAGCC GAGCGAGCAG GCGAGAGAGA GAGAGAGGGA AGGAGCGAGA GCGGTCGGCG GCGGGCCGGG

1111111111 1111111111 1111111111 1111111111 1111111111 1111111111 1111111111 1111111111 1111111111 1111111111 1111111111
8888888888 8888888888 8888888888 9999999999 9999999999 9999999999 9999999999 9999999999 9999999999 9999999999 9999999999
7777777778 8888888889 9999999990 0000000001 1111111112 2222222223 3333333334 4444444445 5555555556 6666666667 7777777778
1234567890 1234567890 1234567890 1234567890 1234567890 1234567890 1234567890 1234567890 1234567890 1234567890 1234567890

AADN03001677
AADN03001778
AADN03001785  CCCGTCGGGT CGTGCCCGT GCGCGGCTA CCTGGTTGAT CTGCCAGTA GCATATGCTT GTCTCAAAGA TTAAGCCATG CATGTCTAAG TACACACGGG CCGTACAGTG
AADN03001786  CCCGTCGGGT CGTGCCCGT GCGCGGCTA CCTGGTTGAT CTGCCAGTA GCATATGCTT GTCTCAAAGA TTAAGCCATG CATGTCTAAG TACACACGGG CCGTACAGTG
AADN03001788  CCCGTCGGGT CGTGCCCGT GCGCGGCTA CCTGGTTGAT CTGCCAGTA GCATATGCTT GTCTCAAAGA TTAAGCCATG CATGTCTAAG TACACACGGG CCGTACAGTG
AADN03014081
AADN03015064
AADN03026634
NW_003775878  NNNNNNNNNN NNNNNNNNNN
DQ018752
DQ018757
DQ112354
FM165414  -----T CCTGCCAGTA GCATATGCTT GTCTCAAAGA TTAAGCCATG CATGTCTAAG TACACACGGG CCGTACAGTG
FM165415
AADN03000430
AADN03001784
AADN03001783
DQ018754
AADN03001782
JN639848
AADN03001670
HQ873432  -----T CCTGCCAGTA GCATATGCTT GTCTCAAAGA TTAAGCCATG CATGTCTAAG TACACACGGG CCGTACAG--
AADN03001774
AADN03001775
EF552813
AADN03022685
AADN03019346
AADN03001776
DQ018756
AF173612
Gallus_gallus_KT445934.2  CCCGTCGGGT CGTGCCCGT GCGCGGCTA CCTGGTTGAT CTGCCAGTA GCATATGCTT GTCTCAAAGA TTAAGCCATG CATGTCTAAG TACACACGGG CCGTACAGTG

1111111111 1111111112 2222222222 2222222222 2222222222 2222222222 2222222222 2222222222 2222222222 2222222222 2222222222
9999999999 9999999990 0000000000 0000000000 0000000000 0000000000 0000000000 0000000000 0000000000 0000000000 0000000000
8888888889 9999999990 0000000001 1111111112 2222222223 3333333334 4444444445 5555555556 6666666667 7777777778 8888888889
1234567890 1234567890 1234567890 1234567890 1234567890 1234567890 1234567890 1234567890 1234567890 1234567890 1234567890

AADN03001677  -----TA AATCAGTTAT GGTTCCTTTG GTCGCTCCCC TCCCGTFACT TGGATAACTG TGGTAATTCT AGAGCTAATA CATGCCGACG AGCGCCGACC
AADN03001778
AADN03001785  AAAGTGCAG TGGCTCATTA AATCAGTTAT GGTTCCTTTG GTCGCTCCCC TCCCGTFACT TGGATAACTG TGGTAATTCT AGAGCTAATA CATGCCGACG AGCGCCGACC
AADN03001786  AAAGTGCAG TGGCTCATTA AATCAGTTAT GGTTCCTTTG GTCGCTCCCC TCCCGTFACT TGGATAACTG TGGTAATTCT AGAGCTAATA CATGCCGACG AGCGCCGACC
AADN03001788  AAAGTGCAG TGGCTCATTA AATCAGTTAT GGTTCCTTTG GTCGCTCCCC TCCCGTFACT TGGATAACTG TGGTAATTCT AGAGCTAATA CATGCCGACG AGCGCCGACC
AADN03014081
AADN03015064
AADN03026634  -----GAA TGGCTCATTA AATCAGTTAT GGTTCCTTTG GTCGCTCCCC TCCCGTFACT TGGATAACTG TGGTAATTCT AGAGGTAATA CATGCCGACG AGCGCCGACC
NW_003775878  NNNNNNNNGAA TGGCTCATTA AATCAGTTAT GGTTCCTTTG GTCGCTCCCC TCCCGTFACT TGGATAACTG TGGTAATTCT AGAGGTAATA CATGCCGACG AGCGCCGACC
DQ018752  -----TTCCTTTG GTCGCTCCCC TCCCGTFACT TGGATAACTG TGGTAATTCT AGAGCTAATA CATGCCGACG AGCGCCGACC
DQ018757
DQ112354

```















|                          |            |            |            |            |            |            |            |            |            |            |            |            |
|--------------------------|------------|------------|------------|------------|------------|------------|------------|------------|------------|------------|------------|------------|
| AADN03001784             | -----      | -----      | -----      | -----      | -----      | -----      | -----      | -----      | -----      | -----      | -----      | -----      |
| AADN03001783             | -----      | -----      | -----      | -----      | -----      | -----      | -----      | -----      | -----      | -----      | -----      | -----      |
| DQ018754                 | -----      | -----      | -----      | -----      | -----      | -----      | -----      | -----      | -----      | -----      | -----      | -----      |
| AADN03001782             | -----      | -----      | -----      | -----      | -----      | -----      | -----      | -----      | -----      | -----      | -----      | -----      |
| JN639848                 | -----      | -----      | -----      | -----      | -----      | -----      | -----      | -----      | -----      | -----      | -----      | -----      |
| AADN03001670             | -----      | -----      | -----      | -----      | -----      | -----      | -----      | -----      | -----      | -----      | -----      | -----      |
| HQ873432                 | TCCCATGACC | CGCCGGGCAG | CTCCCGGGAA | ACCCAAGTCT | TTGGGTTCCG | GGGGGAGTAT | GGTTGCAAAG | CTGAAACTTA | AAGGAATTGA | CGGAAGGGCA | CCACCAGGAG | -----      |
| AADN03001774             | -----      | -----      | -----      | -----      | -----      | -----      | -----      | -----      | -----      | -----      | -----      | -----      |
| AADN03001775             | -----      | -----      | -----      | -----      | -----      | -----      | -----      | -----      | -----      | -----      | -----      | -----      |
| EF552813                 | -----      | -----      | -----      | -----      | -----      | -----      | -----      | -----      | -----      | -----      | -----      | -----      |
| AADN03022685             | -----      | -----      | -----      | -----      | -----      | -----      | -----      | -----      | -----      | -----      | -----      | -----      |
| AADN03019346             | -----      | -----      | -----      | -----      | -----      | -----      | -----      | -----      | -----      | -----      | -----      | -----      |
| AADN03001776             | -----      | -----      | -----      | -----      | -----      | -----      | -----      | -----      | -----      | -----      | -----      | -----      |
| DQ018756                 | -----      | -----      | -----      | -----      | -----      | -----      | -----      | -----      | -----      | -----      | -----      | -----      |
| AF173612                 | TCCCATGACC | CGCCGGGCAG | CTCCCGGGAA | ACCCAAGTCT | TTGGGTTCCG | GGGGGAGTAT | GGTTGCAAAG | CTGAAACTTA | AAGGAATTGA | CGGAAGGGCA | CCACCAGGAG | -----      |
| Gallus_gallus_KT445934.2 | TCCCATGACC | CGCCGGGCAG | CTCCCGGGAA | ACCCAAGTCT | TTGGGTTCCG | GGGGGAGTAT | GGTTGCAAAG | CTGAAACTTA | AAGGAATTGA | CGGAAGGGCA | CCACCAGGAG | -----      |
|                          | 3333333333 | 3333333333 | 3333333333 | 3333333333 | 3333333333 | 3333333333 | 3333333333 | 3333333333 | 3333333333 | 3333333333 | 3333333333 | 3333333333 |
|                          | 0000000000 | 0000000001 | 1111111111 | 1111111111 | 1111111111 | 1111111111 | 1111111111 | 1111111111 | 1111111111 | 1111111111 | 1111111111 | 1111111111 |
|                          | 8888888889 | 9999999990 | 0000000001 | 1111111112 | 2222222223 | 3333333334 | 4444444445 | 5555555556 | 6666666667 | 7777777778 | 8888888889 | -----      |
|                          | 1234567890 | 1234567890 | 1234567890 | 1234567890 | 1234567890 | 1234567890 | 1234567890 | 1234567890 | 1234567890 | 1234567890 | 1234567890 | 1234567890 |
| AADN03001677             | -----      | -----      | -----      | -----      | -----      | -----      | -----      | -----      | -----      | -----      | -----      | -----      |
| AADN03001778             | -----      | -----      | -----      | -----      | -----      | -----      | -----      | -----      | -----      | -----      | -----      | -----      |
| AADN03001785             | -----      | -----      | -----      | -----      | -----      | -----      | -----      | -----      | -----      | -----      | -----      | -----      |
| AADN03001786             | -----      | -----      | -----      | -----      | -----      | -----      | -----      | -----      | -----      | -----      | -----      | -----      |
| AADN03001788             | -----      | -----      | -----      | -----      | -----      | -----      | -----      | -----      | -----      | -----      | -----      | -----      |
| AADN03014081             | -----      | -----      | -----      | -----      | -----      | -----      | -----      | -----      | -----      | -----      | -----      | -----      |
| AADN03015064             | -----      | -----      | -----      | -----      | -----      | -----      | -----      | -----      | -----      | -----      | -----      | -----      |
| AADN03026634             | TGGAGCCTGC | GGCTTAATTT | GACTCAACAC | GGGAAACCTC | ACCCGGCCCG | GACACGGACA | GGATTGACAG | ATTGAGAGCT | CTTCTCGAT  | TCCGTGGGTG | GTGGTGCATG | -----      |
| NW_003775878             | TGGAGCCTGC | GGCTTAATTT | GACTCAACAC | GGGAAACCTC | ACCCGGCCCG | GACACGGACA | GGATTGACAG | ATTGAGAGCT | CTTCTCGAT  | TCCGTGGGTG | GTGGTGCATG | -----      |
| DQ018752                 | TGGAGCCTGC | GGCTTAATTT | GACTCAACAC | GGGAAACCTC | ACCCGGCCCG | GACACGGACA | GGATTGACAG | ATTGAGAGCT | CTTCTCGAT  | TCCGTGGGTG | GTGGTGCATG | -----      |
| DQ018757                 | -----      | -----      | -----      | -----      | -----      | -----      | -----      | -----      | -----      | -----      | -----      | -----      |
| DQ112354                 | -----      | -----      | -----      | -----      | -----      | -----      | -----      | -----      | -----      | -----      | -----      | -----      |
| FM165414                 | TGGAGCCTGC | GGCTTAATTT | GACTCAACAC | GGGAAACCTC | ACCCGGCCCG | GACACGGACA | GGATTGACAG | ATTGAGAGCT | CTTCTCGAT  | TCCGTGGGTG | GTGGTGCATG | -----      |
| FM165415                 | -----      | -----      | -----      | -----      | -----      | -----      | -----      | -----      | -----      | -----      | -----      | -----      |
| AADN03000430             | -----      | -----      | -----      | -----      | -----      | -----      | -----      | -----      | -----      | -----      | -----      | -----      |
| AADN03001784             | -----      | -----      | -----      | -----      | -----      | -----      | -----      | -----      | -----      | -----      | -----      | -----      |
| AADN03001783             | -----      | -----      | -----      | -----      | -----      | -----      | -----      | -----      | -----      | -----      | -----      | -----      |
| DQ018754                 | -----      | -----      | -----      | -----      | -----      | -----      | -----      | -----      | -----      | -----      | -----      | -----      |
| AADN03001782             | -----      | -----      | -----      | -----      | -----      | -----      | -----      | -----      | -----      | -----      | -----      | -----      |
| JN639848                 | -----      | -----      | -----      | -----      | -----      | -----      | -----      | -----      | -----      | -----      | -----      | -----      |
| AADN03001670             | -----      | -----      | -----      | -----      | -----      | -----      | -----      | -----      | -----      | -----      | -----      | -----      |
| HQ873432                 | TGGAGCCTGC | GGCTTAATTT | GACTCAACAC | GGGAAACCTC | ACCCGGCCCG | GACACGGACA | GGATTGACAG | ATTGAGAGCT | CTTCTCGAT  | TCCGTGGGTG | GTGGTGCATG | -----      |
| AADN03001774             | -----      | -----      | -----      | -----      | -----      | -----      | -----      | -----      | -----      | -----      | -----      | -----      |
| AADN03001775             | -----      | -----      | -----      | -----      | -----      | -----      | -----      | -----      | -----      | -----      | -----      | -----      |
| EF552813                 | -----      | -----      | -----      | -----      | -----      | -----      | -----      | -----      | -----      | -----      | -----      | -----      |
| AADN03022685             | -----      | -----      | -----      | -----      | -----      | -----      | -----      | -----      | -----      | -----      | -----      | -----      |
| AADN03019346             | -----      | -----      | -----      | -----      | -----      | -----      | -----      | -----      | -----      | -----      | -----      | -----      |
| AADN03001776             | -----      | -----      | -----      | -----      | -----      | -----      | -----      | -----      | -----      | -----      | -----      | -----      |
| DQ018756                 | -----      | -----      | -----      | -----      | -----      | -----      | -----      | -----      | -----      | -----      | -----      | -----      |
| AF173612                 | TGGAGCCTGC | GGCTTAATTT | GACTCAACAC | GGGAAACCTC | ACCCGGCCCG | GACACGGACA | GGATTGACAG | ATTGAGAGCT | CTTCTCGAT  | TCCGTGGGTG | GTGGTGCATG | -----      |
| Gallus_gallus_KT445934.2 | TGGAGCCTGC | GGCTTAATTT | GACTCAACAC | GGGAAACCTC | ACCCGGCCCG | GACACGGACA | GGATTGACAG | ATTGAGAGCT | CTTCTCGAT  | TCCGTGGGTG | GTGGTGCATG | -----      |



|                          |            |            |            |            |            |            |            |            |            |            |            |            |
|--------------------------|------------|------------|------------|------------|------------|------------|------------|------------|------------|------------|------------|------------|
| AADN03001784             | -----      | -----      | -----      | -----      | -----      | -----      | -----      | -----      | -----      | -----      | -----      | -----      |
| AADN03001783             | -----      | -----      | -----      | -----      | -----      | -----      | -----      | -----      | -----      | -----      | -----      | -----      |
| DQ018754                 | -----      | -----      | -----      | -----      | -----      | -----      | -----      | -----      | -----      | -----      | -----      | -----      |
| AADN03001782             | -----      | -----      | -----      | -----      | -----      | -----      | -----      | -----      | -----      | -----      | -----      | -----      |
| JN639848                 | -----      | -----      | -----      | -----      | -----      | -----      | -----      | -----      | -----      | -----      | -----      | -----      |
| AADN03001670             | -----      | -----      | -----      | -----      | -----      | -----      | -----      | -----      | -----      | -----      | -----      | -----      |
| HQ873432                 | AGGGACAAGT | GCGCGTTCAG | CCACCCGAGA | TTGAGCAATA | ACAGGTCTGT | GATGCGCCTT | AGATGTCCGG | GGCTGCACGC | GCGCTACACT | GACTGGCTCA | GCTTGTGTCT |            |
| AADN03001774             | -----      | -----      | -----      | -----      | -----      | -----      | -----      | -----      | -----      | -----      | -----      | -----      |
| AADN03001775             | -----      | -----      | -----      | -----      | -----      | -----      | -----      | -----      | -----      | -----      | -----      | -----      |
| EF552813                 | -----      | -----      | -----      | -----      | -----      | -----      | -----      | -----      | -----      | -----      | -----      | -----      |
| AADN03022685             | -----      | -----      | -----      | -----      | -----      | -----      | -----      | -----      | -----      | -----      | -----      | -----      |
| AADN03019346             | -----      | -----      | -----      | -----      | -----      | -----      | -----      | -----      | -----      | -----      | -----      | -----      |
| AADN03001776             | -----      | -----      | -----      | -----      | -----      | -----      | -----      | -----      | -----      | -----      | -----      | -----      |
| DQ018756                 | -----      | -----      | -----      | -----      | -----      | -----      | -----      | -----      | -----      | -----      | -----      | -----      |
| AF173612                 | AGGGACAAGT | G-GCGTTCAG | CCACCCGAGA | TTGAGCAATA | ACAGGTCTGT | GATGC-CCTT | AGATGTCCGG | GGCTGCACGC | GCGCTACACT | GACTGGCTCA | GCTTGTGTCT |            |
| Gallus_gallus_KT445934.2 | AGGGACAAGT | G-GCGTTCAG | CCACCCGAGA | TTGAGCAATA | ACAGGTCTGT | GATGC-CCTT | AGATGTCCGG | GGCTGCACGC | GCGCTACACT | GACTGGCTCA | GCTTGTGTCT |            |
|                          | 3333333333 | 3333333333 | 3333333333 | 3333333333 | 3333333333 | 3333333333 | 3333333333 | 3333333333 | 3333333333 | 3333333333 | 3333333333 | 3333333333 |
|                          | 4444444444 | 4444444444 | 4444444444 | 4444444444 | 4444444444 | 4444444444 | 4444444444 | 4444444444 | 4444444444 | 4444444444 | 5555555555 | 5555555555 |
|                          | 1111111112 | 2222222223 | 3333333334 | 4444444445 | 5555555556 | 6666666667 | 7777777778 | 8888888889 | 9999999990 | 0000000001 | 1111111112 |            |
|                          | 1234567890 | 1234567890 | 1234567890 | 1234567890 | 1234567890 | 1234567890 | 1234567890 | 1234567890 | 1234567890 | 1234567890 | 1234567890 | 1234567890 |
| AADN03001677             | -----      | -----      | -----      | -----      | -----      | -----      | -----      | -----      | -----      | -----      | -----      | -----      |
| AADN03001778             | -----      | -----      | -----      | -----      | -----      | -----      | -----      | -----      | -----      | -----      | -----      | -----      |
| AADN03001785             | -----      | -----      | -----      | -----      | -----      | -----      | -----      | -----      | -----      | -----      | -----      | -----      |
| AADN03001786             | -----      | -----      | -----      | -----      | -----      | -----      | -----      | -----      | -----      | -----      | -----      | -----      |
| AADN03001788             | -----      | -----      | -----      | -----      | -----      | -----      | -----      | -----      | -----      | -----      | -----      | -----      |
| AADN03014081             | -----      | -----      | -----      | -----      | -----      | -----      | -----      | -----      | -----      | -----      | -----      | -----      |
| AADN03015064             | -----      | -----      | -----      | -----      | -----      | -----      | -----      | -----      | -----      | -----      | -----      | -----      |
| AADN03026634             | ACCCTACGCC | GGCAGGCGCG | GGTAACCCGT | TGAACCCAT  | TCGTGATGGG | GATCGGGGAT | TGCAATTATT | CCCCATGAAC | GAGGAATTCC | CAGTAAGTGC | GGGTCATAAG |            |
| NW_003775878             | ACCCTACGCC | GGCAGGCGCG | GGTAACCCGT | TGAACCCAT  | TCGTGATGGG | GATCGGGGAT | TGCAATTATT | CCCCATGAAC | GAGGAATTCC | CAGTAAGTGC | GGGTCATAAG |            |
| DQ018752                 | ACCCTACGCC | GGCAGGCGCG | GGTAACCCGT | TGAACCCAT  | TCGTGATGGG | GATCGGGGAT | TGCAATTATT | CCCCATGAAC | GAGGAATTCC | CAGTAAGTGC | GGGTCATAAG |            |
| DQ018757                 | -----      | -----      | -----      | -----      | -----      | -----      | -----      | -----      | -----      | -----      | -----      | -----      |
| DQ112354                 | -----      | -----      | -----      | -----      | -----      | -----      | -----      | -----      | -----      | -----      | -----      | -----      |
| FM165414                 | ACCCTACGCC | GGCAGGCGCG | GGTAACCCGT | TGAACCCAT  | TCGTGATGGG | GATCGGGGAT | TGCAATTATT | CCCCATGAAC | GAGGAATTCC | CAGTAAGTGC | GGGTCATAAG |            |
| FM165415                 | -----      | -----      | -----      | -----      | -----      | -----      | -----      | -----      | -----      | -----      | -----      | -----      |
| AADN03000430             | -----      | -----      | -----      | -----      | --GTGATGGG | GATCGGGGAT | TGCAATTATT | CCCCATGAAC | GAGGAATTCC | CAGTAAGTGC | GGGTCATAAG |            |
| AADN03001784             | -----      | -----      | -----      | -----      | -----      | -----      | -----      | -----      | -----      | -----      | -----      | -----      |
| AADN03001783             | -----      | -----      | -----      | -----      | -----      | -----      | -----      | -----      | -----      | -----      | -----      | -----      |
| DQ018754                 | -----      | -----      | -----      | -----      | -----      | -----      | -----      | -----      | -----      | -----      | -----      | -----      |
| AADN03001782             | -----      | -----      | -----      | -----      | -----      | -----      | -----      | -----      | -----      | -----      | -----      | -----      |
| JN639848                 | -----      | -----      | -----      | -----      | -----      | -----      | -----      | -----      | -----      | -----      | -----      | -----      |
| AADN03001670             | -----      | -----      | -----      | -----      | -----      | -----      | -----      | -----      | -----      | -----      | -----      | -----      |
| HQ873432                 | ACCCTACGCC | GGCAGGCGCG | GGTAACCCGT | TGAACCCAT  | TCGTGATGGG | GATCGGGGAT | TGCAATTATT | CCCCATGAAC | GAGGAATTCC | CAGTAAGTGC | GGGTCATAAG |            |
| AADN03001774             | -----      | -----      | -----      | -----      | -----      | -----      | -----      | -----      | -----      | -----      | -----      | -----      |
| AADN03001775             | -----      | -----      | -----      | -----      | -----      | -----      | -----      | -----      | -----      | -----      | -----      | -----      |
| EF552813                 | -----      | -----      | -----      | -----      | -----      | -----      | -----      | -----      | -----      | -----      | -----      | -----      |
| AADN03022685             | -----      | -----      | -----      | -----      | -----      | -----      | -----      | -----      | -----      | -----      | -----      | -----      |
| AADN03019346             | -----      | -----      | -----      | -----      | -----      | -----      | -----      | -----      | -----      | -----      | -----      | -----      |
| AADN03001776             | -----      | -----      | -----      | -----      | -----      | -----      | -----      | -----      | -----      | -----      | -----      | -----      |
| DQ018756                 | -----      | -----      | -----      | -----      | -----      | -----      | -----      | -----      | -----      | -----      | -----      | -----      |
| AF173612                 | ACCCTACGCC | GGCAGGCGCG | GGTAACCCGT | TGAACCCAT  | TCGTGATGGG | GATCGGGGAT | TGCAATTATT | CCCCATGAAC | GAGGAATTCC | CAGTAAGTGC | GGGTCATAAG |            |
| Gallus_gallus_KT445934.2 | ACCCTACGCC | GGCAGGCGCG | GGTAACCCGT | TGAACCCAT  | TCGTGATGGG | GATCGGGGAT | TGCAATTATT | CCCCATGAAC | GAGGAATTCC | CAGTAAGTGC | GGGTCATAAG |            |



|                          |            |            |            |            |            |            |            |            |            |            |            |            |
|--------------------------|------------|------------|------------|------------|------------|------------|------------|------------|------------|------------|------------|------------|
| AADN03001784             | -----      | -----      | -----      | -----      | -----      | -----      | -----      | -----      | -----      | -----      | -----      | -----      |
| AADN03001783             | -----      | -----      | -----      | -----      | -----      | -----      | -----      | -----      | -----      | -----      | -----      | -----      |
| DQ018754                 | CCGGAGCGTC | GAGAAGACGG | TCGAACTTGA | CTATCTAGAG | GAAGTAAAAG | TCGTAACAAG | GTTTCCGTAG | GTGAACCTGC | GGAAGGATCA | TTACCGGGGC | CGAGGCCGGG | -----      |
| AADN03001782             | -----      | -----      | -----      | -----      | -----      | -----      | -----      | -----      | -----      | -----      | -----      | -----      |
| JN639848                 | -----      | -----      | -----      | -----      | -----      | -----      | -----      | -----      | -----      | -----      | -----      | -----      |
| AADN03001670             | -----      | -----      | -----      | -----      | -----      | -----      | -----      | -----      | -----      | -----      | -----      | -----      |
| HQ873432                 | CCGGAGCGTC | GAGAAGACGG | TCGAACTTGA | CTATCTAGAG | GAAGTAAAAG | TCGTAACAAG | GTTTCCGTAG | GTGAACCTGC | GGAAGGATCA | -----      | -----      | -----      |
| AADN03001774             | -----      | -----      | -----      | -----      | -----      | -----      | -----      | -----      | -----      | -----      | -----      | -----      |
| AADN03001775             | -----      | -----      | -----      | -----      | -----      | -----      | -----      | -----      | -----      | -----      | -----      | -----      |
| EF552813                 | -----      | -----      | -----      | -----      | -----      | -----      | -----      | -----      | -----      | -----      | -----      | -----      |
| AADN03022685             | -----      | -----      | -----      | -----      | -----      | -----      | -----      | -----      | -----      | -----      | -----      | -----      |
| AADN03019346             | -----      | -----      | -----      | -----      | -----      | -----      | -----      | -----      | -----      | -----      | -----      | -----      |
| AADN03001776             | -----      | -----      | -----      | -----      | -----      | -----      | -----      | -----      | -----      | -----      | -----      | -----      |
| DQ018756                 | -----      | -----      | -----      | -----      | -----      | -----      | -----      | -----      | -----      | -----      | -----      | -----      |
| AF173612                 | CCGGAGCGTC | GAGAAGACGG | TCGAACTTGA | CTATCTAGAG | GAAGTAAA-- | -----      | -----      | -----      | -----      | -----      | -----      | -----      |
| Gallus_gallus_KT445934.2 | CCGGAGCGTC | GAGAAGACGG | TCGAACTTGA | CTATCTAGAG | GAAGTAAAAG | TCGTAACAAG | GTTTCCGTAG | GTGAACCTGC | GGAAGGATCA | TTACCGGGGC | CGAGGCCGGG | -----      |
|                          | 3333333333 | 3333333333 | 3333333333 | 3333333333 | 3333333333 | 3333333333 | 3333333333 | 3333333333 | 3333333333 | 3333333333 | 3333333333 | 3333333333 |
|                          | 7777777777 | 7777777777 | 7777777777 | 7777777777 | 7777777777 | 7777777777 | 7777777777 | 8888888888 | 8888888888 | 8888888888 | 8888888888 | 8888888888 |
|                          | 4444444445 | 5555555556 | 6666666667 | 7777777778 | 8888888889 | 9999999990 | 0000000001 | 1111111112 | 2222222223 | 3333333334 | 4444444445 | -----      |
|                          | 1234567890 | 1234567890 | 1234567890 | 1234567890 | 1234567890 | 1234567890 | 1234567890 | 1234567890 | 1234567890 | 1234567890 | 1234567890 | 1234567890 |
| AADN03001677             | -----      | -----      | -----      | -----      | -----      | -----      | -----      | -----      | -----      | -----      | -----      | -----      |
| AADN03001778             | -----      | -----      | -----      | -----      | -----      | -----      | -----      | -----      | -----      | -----      | -----      | -----      |
| AADN03001785             | -----      | -----      | -----      | -----      | -----      | -----      | -----      | -----      | -----      | -----      | -----      | -----      |
| AADN03001786             | -----      | -----      | -----      | -----      | -----      | -----      | -----      | -----      | -----      | -----      | -----      | -----      |
| AADN03001788             | -----      | -----      | -----      | -----      | -----      | -----      | -----      | -----      | -----      | -----      | -----      | -----      |
| AADN03014081             | -----      | -----      | -----      | -----      | -----      | -----      | -----      | -----      | -----      | -----      | -----      | -----      |
| AADN03015064             | -----      | -----      | -----      | -----      | -----      | -----      | -----      | -----      | -----      | -----      | -----      | -----      |
| AADN03026634             | CGTCCGGCCG | AGCCGTGGCA | CGAGCGCGCG | CGGGCGCGCA | GCCTTCC--  | -----      | -----      | -----      | -----      | -----      | -----      | -----      |
| NW_003775878             | CGTCCGGCCG | AGCCGTGGCA | CGAGCGCGCG | CGGGCGCGCA | GCCTTCC--  | -----      | -----      | -----      | -----      | -----      | -----      | -----      |
| DQ018752                 | CGTCCGGCCG | AGCCGTGGCA | CGAGCGCGCG | CGGGCGCGCA | GCCTTCCCTT | CCCTTCCCCG | AGCCCGCTCC | GCGCGGAGCG | CGGCTCCTCT | CCCCCGGTCC | AAACGGGGAA | -----      |
| DQ018757                 | -----      | -----      | -----      | -----      | -----      | -----      | -----      | -----      | -----      | -----      | -----      | -----      |
| DQ112354                 | -----      | -----      | -----      | -----      | -----      | -----      | -----      | -----      | -----      | -----      | -----      | -----      |
| FM165414                 | -----      | -----      | -----      | -----      | -----      | -----      | -----      | -----      | -----      | -----      | -----      | -----      |
| FM165415                 | -----      | -----      | -----      | -----      | -----      | -----      | -----      | -----      | -----      | -----      | -----      | -----      |
| AADN03000430             | CGTCCGGCCG | AGCCGTGGCA | CGAGCGCGCG | CGGGCGCGCA | GCCTTCCCTT | CCCTTCCCCG | AGCCCGCTCC | GCGCGGAGCG | CGGCTCCTCT | CCCCCGGTCC | AAACGGGGAA | -----      |
| AADN03001784             | -----      | -----      | -----      | -----      | -----      | -----      | -----      | -----      | -----      | -----      | -----      | -----      |
| AADN03001783             | -----      | -----      | -----      | -----      | -----      | -----      | -----      | -----      | -----      | -----      | -----      | -----      |
| DQ018754                 | CGTCCGGCCG | AGCCGTGGCA | CGAGCGCGCG | CGGGCGCGCA | GCCTTCCCTT | CCC-----CG | AGCCCGCTCC | GCGCGGAGCG | CGGCTCCTCC | CCCCCGGTCC | AAACGGGGAA | -----      |
| AADN03001782             | -----      | -----      | -----      | -----      | -----      | -----      | -----      | -----      | -----      | -----      | -----      | -----      |
| JN639848                 | -----      | -----      | -----      | -----      | -----      | -----      | -----      | -----      | -----      | -----      | -----      | -----      |
| AADN03001670             | -----      | -----      | -----      | -----      | -----      | -----      | -----      | -----      | -----      | -----      | -----      | -----      |
| HQ873432                 | -----      | -----      | -----      | -----      | -----      | -----      | -----      | -----      | -----      | -----      | -----      | -----      |
| AADN03001774             | -----      | -----      | -----      | -----      | -----      | -----      | -----      | -----      | -----      | -----      | -----      | -----      |
| AADN03001775             | -----      | -----      | -----      | -----      | -----      | -----      | -----      | -----      | -----      | -----      | -----      | -----      |
| EF552813                 | -----      | -----      | -----      | -----      | -----      | -----      | -----      | -----      | -----      | -----      | -----      | -----      |
| AADN03022685             | -----      | -----      | -----      | -----      | -----      | -----      | -----      | -----      | -----      | -----      | -----      | -----      |
| AADN03019346             | -----      | -----      | -----      | -----      | -----      | -----      | -----      | -----      | -----      | -----      | -----      | -----      |
| AADN03001776             | -----      | -----      | -----      | -----      | -----      | -----      | -----      | -----      | -----      | -----      | -----      | -----      |
| DQ018756                 | -----      | -----      | -----      | -----      | -----      | -----      | -----      | -----      | -----      | -----      | -----      | -----      |
| AF173612                 | -----      | -----      | -----      | -----      | -----      | -----      | -----      | -----      | -----      | -----      | -----      | -----      |
| Gallus_gallus_KT445934.2 | CGTCCGGCCG | AGCCGTGGCA | CGAGCGCGCG | CGGGCGCGCA | GCCTTCCCTT | CCCTTCCCCG | AGCCCGCTCC | GCGCGGAGCG | CGGCTCCTCT | CCCCCGGTCC | AAACGGGGAA | -----      |





|                          |            |            |            |             |            |            |            |            |            |            |             |            |
|--------------------------|------------|------------|------------|-------------|------------|------------|------------|------------|------------|------------|-------------|------------|
| AADN03001784             | -----      | -----      | -----      | -----       | -----      | -----      | -----      | -----      | -----      | -----      | -----       | -----      |
| AADN03001783             | -----      | -----      | -----      | -----       | -----      | -----      | -----      | -----      | -----      | -----      | -----       | -----      |
| DQ018754                 | GCTCCGGCGC | GTCTCTCCCC | CCCCGGCGCC | GGTCCGCCGT  | CGGTCCGCAC | GCCGCGGGTC | CGGTCCGTCC | GGTCGCCTCG | CCGGCGCGCG | CCCGCGCGCG | CGCGTCCC GC | -----      |
| AADN03001782             | -----      | -----      | -----      | -----       | -----      | -----      | -----      | -----      | -----      | -----      | -----       | -----      |
| JN639848                 | -----      | -----      | -----      | -----       | -----      | -----      | -----      | -----      | -----      | -----      | -----       | -----      |
| AADN03001670             | -----      | -----      | -----      | -----       | -----      | -----      | -----      | -----      | -----      | -----      | -----       | -----      |
| HQ873432                 | -----      | -----      | -----      | -----       | -----      | -----      | -----      | -----      | -----      | -----      | -----       | -----      |
| AADN03001774             | -----      | -----      | -----      | -----       | -----      | -----      | -----      | -----      | -----      | -----      | -----       | -----      |
| AADN03001775             | -----      | -----      | -----      | -----       | -----      | -----      | -----      | -----      | -----      | -----      | -----       | -----      |
| EF552813                 | -----      | -----      | -----      | -----       | -----      | -----      | -----      | -----      | -----      | -----      | -----       | -----      |
| AADN03022685             | -----      | -----      | -----      | -----       | -----      | -----      | -----      | -----      | -----      | -----      | -----       | -----      |
| AADN03019346             | -----      | -----      | -----      | -----       | -----      | -----      | -----      | -----      | -----      | -----      | -----       | -----      |
| AADN03001776             | -----      | -----      | -----      | -----       | -----      | -----      | -----      | -----      | -----      | -----      | -----       | -----      |
| DQ018756                 | -----      | -----      | -----      | -----       | -----      | -----      | -----      | -----      | -----      | -----      | -----       | -----      |
| AF173612                 | -----      | -----      | -----      | -----       | -----      | -----      | -----      | -----      | -----      | -----      | -----       | -----      |
| Gallus_gallus_KT445934.2 | GCTCCGGCGC | GTCTCTCCCC | CCCCGGCGCC | GGTCCGCCGT  | CGGTCCGCAC | GCCGCGGGTC | CGGTCCGTCC | GGTCGCCTCG | CCGGCGCGCG | CCCGCGCGCG | CGCGTCCC GC | -----      |
|                          | 4444444444 | 4444444444 | 4444444444 | 4444444444  | 4444444444 | 4444444444 | 4444444444 | 4444444444 | 4444444444 | 4444444444 | 4444444444  | 4444444444 |
|                          | 0000000000 | 0000000000 | 0000000001 | 1111111111  | 1111111111 | 1111111111 | 1111111111 | 1111111111 | 1111111111 | 1111111111 | 1111111111  | 1111111111 |
|                          | 7777777778 | 8888888889 | 9999999990 | 0000000001  | 1111111112 | 2222222223 | 3333333334 | 4444444445 | 5555555556 | 6666666667 | 7777777778  | -----      |
|                          | 1234567890 | 1234567890 | 1234567890 | 1234567890  | 1234567890 | 1234567890 | 1234567890 | 1234567890 | 1234567890 | 1234567890 | 1234567890  | 1234567890 |
| AADN03001677             | -----      | -----      | -----      | -----       | -----      | -----      | -----      | -----      | -----      | -----      | -----       | -----      |
| AADN03001778             | -----      | -----      | -----      | -----       | -----      | -----      | -----      | -----      | -----      | -----      | -----       | -----      |
| AADN03001785             | -----      | -----      | -----      | -----       | -----      | -----      | -----      | -----      | -----      | -----      | -----       | -----      |
| AADN03001786             | -----      | -----      | -----      | -----       | -----      | -----      | -----      | -----      | -----      | -----      | -----       | -----      |
| AADN03001788             | -----      | -----      | -----      | -----       | -----      | -----      | -----      | -----      | -----      | -----      | -----       | -----      |
| AADN03014081             | -----      | -----      | -----      | -----       | -----      | -----      | -----      | -----      | -----      | -----      | -----       | -----      |
| AADN03015064             | -----      | -----      | -----      | -----       | -----      | -----      | -----      | -----      | -----      | -----      | -----       | -----      |
| AADN03026634             | -----      | -----      | -----      | -----       | -----      | -----      | -----      | -----      | -----      | -----      | -----       | -----      |
| NW_003775878             | -----      | -----      | -----      | -----       | -----      | -----      | -----      | -----      | -----      | -----      | -----       | -----      |
| DQ018752                 | -----      | -----      | -----      | -----       | -----      | -----      | -----      | -----      | -----      | -----      | -----       | -----      |
| DQ018757                 | -----      | -----      | -----      | -----       | -----      | -----      | -----      | -----      | -----      | -----      | -----       | -----      |
| DQ112354                 | -----      | -----      | -----      | -----       | -----      | -----      | -----      | -----      | -----      | -----      | -----       | -----      |
| FM165414                 | -----      | -----      | -----      | -----       | -----      | -----      | -----      | -----      | -----      | -----      | -----       | -----      |
| FM165415                 | -----      | -----      | -----      | -----       | -----      | -----      | -----      | -----      | -----      | -----      | -----       | -----      |
| AADN03000430             | GGGCCTCGCC | CGGGTCGCCG | CGCTCCGGAG | CGTCCC GCGG | CCGAGTCCCG | CTCCGACCGC | GGGGTCGGGG | TCGGGAGGTG | GCGGCGGTGC | GGAGGGTGA  | AGGACGGCTC  | -----      |
| AADN03001784             | -----      | -----      | -----      | -----       | -----      | -----      | -----      | -----      | -----      | -----      | -----       | -----      |
| AADN03001783             | -----      | -----      | -----      | -----       | -----      | -----      | -----      | -----      | -----      | -----      | -----       | -----      |
| DQ018754                 | GGGCCTCGCC | CCGGCCGCCG | CGCTCCGGAG | CGTCCC GCGG | CCGAGTCCCG | CTCCGACCGC | GGGGTCGGGG | TCGGGAGGTG | GCGGCGGTGC | GGAGGGTGA  | AGGACGGCTC  | -----      |
| AADN03001782             | -----      | -----      | -----      | -----       | -----      | -----      | -----      | -----      | -----      | -----      | -----       | -----      |
| JN639848                 | -----      | -----      | -----      | -----       | -----      | -----      | -----      | -----      | -----      | -----      | -----       | -----      |
| AADN03001670             | -----      | -----      | -----      | -----       | -----      | -----      | -----      | -----      | -----      | -----      | -----       | -----      |
| HQ873432                 | -----      | -----      | -----      | -----       | -----      | -----      | -----      | -----      | -----      | -----      | -----       | -----      |
| AADN03001774             | -----      | -----      | -----      | -----       | -----      | -----      | -----      | -----      | -----      | -----      | -----       | -----      |
| AADN03001775             | -----      | -----      | -----      | -----       | -----      | -----      | -----      | -----      | -----      | -----      | -----       | -----      |
| EF552813                 | -----      | -----      | -----      | -----       | -----      | -----      | -----      | -----      | -----      | -----      | -----       | -----      |
| AADN03022685             | -----      | -----      | -----      | -----       | -----      | -----      | -----      | -----      | -----      | -----      | -----       | -----      |
| AADN03019346             | -----      | -----      | -----      | -----       | -----      | -----      | -----      | -----      | -----      | -----      | -----       | -----      |
| AADN03001776             | -----      | -----      | -----      | -----       | -----      | -----      | -----      | -----      | -----      | -----      | -----       | -----      |
| DQ018756                 | -----      | -----      | -----      | -----       | -----      | -----      | -----      | -----      | -----      | -----      | -----       | -----      |
| AF173612                 | -----      | -----      | -----      | -----       | -----      | -----      | -----      | -----      | -----      | -----      | -----       | -----      |
| Gallus_gallus_KT445934.2 | GGGCCTCGCC | CGGGTCGCCG | CGCTCCGGAG | CGTCCC GCGG | CCGAGTCCCG | CTCCGACCGC | GGGGTCGGGG | TCGGGAGGTG | GCGGCGGTGC | GGAGGGTGA  | AGGACGGCTC  | -----      |



|                          |            |            |            |            |            |            |            |            |            |            |            |            |
|--------------------------|------------|------------|------------|------------|------------|------------|------------|------------|------------|------------|------------|------------|
| AADN03001784             | -----      | -----      | -----      | -----      | -----      | -----      | -----      | -----      | -----      | -----      | -----      | -----      |
| AADN03001783             | -----      | -----      | -----      | -----      | -----      | -----      | -----      | -----      | -----      | -----      | -----      | -----      |
| DQ018754                 | CGGCGGGCGG | CGGGTCCGAG | CGCGGGGCGC | GGGAAGTCGG | CCGCTTCCCC | CGGCCTCACC | CCCCACCCCC | TTCGCCCGGC | CCGTGCGGGG | GACGGGGCCG | GGTCGCGGGC | -----      |
| AADN03001782             | -----      | -----      | -----      | -----      | -----      | -----      | -----      | -----      | -----      | -----      | -----      | -----      |
| JN639848                 | -----      | -----      | -----      | -----      | -----      | -----      | -----      | -----      | -----      | -----      | -----      | -----      |
| AADN03001670             | -----      | -----      | -----      | -----      | -----      | -----      | -----      | -----      | -----      | -----      | -----      | -----      |
| HQ873432                 | -----      | -----      | -----      | -----      | -----      | -----      | -----      | -----      | -----      | -----      | -----      | -----      |
| AADN03001774             | -----      | -----      | -----      | -----      | -----      | -----      | -----      | -----      | -----      | -----      | -----      | -----      |
| AADN03001775             | -----      | -----      | -----      | -----      | -----      | -----      | -----      | -----      | -----      | -----      | -----      | -----      |
| EF552813                 | -----      | -----      | -----      | -----      | -----      | -----      | -----      | -----      | -----      | -----      | -----      | -----      |
| AADN03022685             | -----      | -----      | -----      | -----      | -----      | -----      | -----      | -----      | -----      | -----      | -----      | -----      |
| AADN03019346             | -----      | -----      | -----      | -----      | -----      | -----      | -----      | -----      | -----      | -----      | -----      | -----      |
| AADN03001776             | -----      | -----      | -----      | -----      | -----      | -----      | -----      | -----      | -----      | -----      | -----      | -----      |
| DQ018756                 | -----      | -----      | -----      | -----      | -----      | -----      | -----      | -----      | -----      | -----      | -----      | -----      |
| AF173612                 | -----      | -----      | -----      | -----      | -----      | -----      | -----      | -----      | -----      | -----      | -----      | -----      |
| Gallus_gallus_KT445934.2 | CGGCGGGCGG | CGGGTCCGAG | CGCGGGGCGC | GGGAAGTCGG | CCGCTTCCCC | CGGCCTCACC | CCCCACCCCC | TTCGCCCGGC | CCGTGCGGGG | GACGGGGCCG | GGTCGCGGGC | -----      |
|                          | 4444444444 | 4444444444 | 4444444444 | 4444444444 | 4444444444 | 4444444444 | 4444444444 | 4444444444 | 4444444444 | 4444444444 | 4444444444 | 4444444444 |
|                          | 4444444444 | 4444444444 | 4444444444 | 4444444444 | 4444444444 | 4444444444 | 4444444444 | 4444444444 | 4444444444 | 4444444444 | 4444444444 | 5555555555 |
|                          | 0000000001 | 1111111112 | 2222222223 | 3333333334 | 4444444445 | 5555555556 | 6666666667 | 7777777778 | 8888888889 | 9999999990 | 0000000001 | -----      |
|                          | 1234567890 | 1234567890 | 1234567890 | 1234567890 | 1234567890 | 1234567890 | 1234567890 | 1234567890 | 1234567890 | 1234567890 | 1234567890 | 1234567890 |
| AADN03001677             | -----      | -----      | -----      | -----      | -----      | -----      | -----      | -----      | -----      | -----      | -----      | -----      |
| AADN03001778             | -----      | -----      | -----      | -----      | -----      | -----      | -----      | -----      | -----      | -----      | -----      | -----      |
| AADN03001785             | -----      | -----      | -----      | -----      | -----      | -----      | -----      | -----      | -----      | -----      | -----      | -----      |
| AADN03001786             | -----      | -----      | -----      | -----      | -----      | -----      | -----      | -----      | -----      | -----      | -----      | -----      |
| AADN03001788             | -----      | -----      | -----      | -----      | -----      | -----      | -----      | -----      | -----      | -----      | -----      | -----      |
| AADN03014081             | -----      | -----      | -----      | -----      | -----      | -----      | -----      | -----      | -----      | -----      | -----      | -----      |
| AADN03015064             | -----      | -----      | -----      | -----      | -----      | -----      | -----      | -----      | -----      | -----      | -----      | -----      |
| AADN03026634             | -----      | -----      | -----      | -----      | -----      | -----      | -----      | -----      | -----      | -----      | -----      | -----      |
| NW_003775878             | -----      | -----      | -----      | -----      | -----      | -----      | -----      | -----      | -----      | -----      | -----      | -----      |
| DQ018752                 | -----      | -----      | -----      | -----      | -----      | -----      | -----      | -----      | -----      | -----      | -----      | -----      |
| DQ018757                 | -----      | -----      | -----      | -----      | -----      | -----      | -----      | -----      | -----      | -----      | -----      | -----      |
| DQ112354                 | -----      | -----      | -----      | -----      | -----      | -----      | -----      | -----      | -----      | -----      | -----      | -----      |
| FM165414                 | -----      | -----      | -----      | -----      | -----      | -----      | -----      | -----      | -----      | -----      | -----      | -----      |
| FM165415                 | -----      | -----      | -----      | -----      | -----      | -----      | -----      | -----      | -----      | -----      | -----      | -----      |
| AADN03000430             | GGCTGCGGAG | CCGGCCGACT | CCGGGCGAGC | GCCGGAGGGA | CGCGCGCGCC | GCGTACGCGC | GGCAGGCGCG | AGGTGCCCCG | GGCGGCTTCG | GTCCCGCGCG | GGCGGTCCGA | -----      |
| AADN03001784             | -----      | -----      | -----      | -----      | -----      | -----      | -----      | -----      | -----      | -----      | -----      | -----      |
| AADN03001783             | -----      | -----      | -----      | -----      | -----      | -----      | -----      | -----      | -----      | -----      | -----      | -----      |
| DQ018754                 | GGCTGCGGAG | CCGGCCGACT | CCGGGCGAGC | GCCGGAGGGG | CGCGCGCGCC | GCGTACGCGC | GGCAGGCGCG | AGGTGCCCCG | GGCGGCTTCG | GTCCCGCGCG | GGCGGTCCGA | -----      |
| AADN03001782             | -----      | -----      | -----      | -----      | -----      | -----      | -----      | -----      | -----      | -----      | -----      | -----      |
| JN639848                 | -----      | -----      | -----      | -----      | -----      | -----      | -----      | -----      | -----      | -----      | -----      | -----      |
| AADN03001670             | -----      | -----      | -----      | -----      | -----      | -----      | -----      | -----      | -----      | -----      | -----      | -----      |
| HQ873432                 | -----      | -----      | -----      | -----      | -----      | -----      | -----      | -----      | -----      | -----      | -----      | -----      |
| AADN03001774             | -----      | -----      | -----      | -----      | -----      | -----      | -----      | -----      | -----      | -----      | -----      | -----      |
| AADN03001775             | -----      | -----      | -----      | -----      | -----      | -----      | -----      | -----      | -----      | -----      | -----      | -----      |
| EF552813                 | -----      | -----      | -----      | -----      | -----      | -----      | -----      | -----      | -----      | -----      | -----      | -----      |
| AADN03022685             | -----      | -----      | -----      | -----      | -----      | -----      | -----      | -----      | -----      | -----      | -----      | -----      |
| AADN03019346             | -----      | -----      | -----      | -----      | -----      | -----      | -----      | -----      | -----      | -----      | -----      | -----      |
| AADN03001776             | -----      | -----      | -----      | -----      | -----      | -----      | -----      | -----      | -----      | -----      | -----      | -----      |
| DQ018756                 | -----      | -----      | -----      | -----      | -----      | -----      | -----      | -----      | -----      | -----      | -----      | -----      |
| AF173612                 | -----      | -----      | -----      | -----      | -----      | -----      | -----      | -----      | -----      | -----      | -----      | -----      |
| Gallus_gallus_KT445934.2 | GGCTGCGGAG | CCGGCCGACT | CCGGGCGAGC | GCCGGAGGGA | CGCGCGCGCC | GCGTACGCGC | GGCAGGCGCG | AGGTGCCCCG | GGCGGCTTCG | GTCCCGCGCG | GGCGGTCCGA | -----      |



|                          |            |            |            |            |            |            |            |            |            |            |            |
|--------------------------|------------|------------|------------|------------|------------|------------|------------|------------|------------|------------|------------|
| AADN03001784             | -----      | -----      | -----      | -----      | -----      | -----      | -----      | -----      | -----      | -----      | -----      |
| AADN03001783             | -----      | -----      | -----      | -----      | -----      | -----      | -----      | -----      | -----      | -----      | -----      |
| DQ018754                 | CGCGGGCGGA | CGCTCCCCCG | AGGGGCGCCG | GGGCCGGCTG | GCGGGTGCCG | GGTCTCCCCT | CGGCGCCCCG | TCCCGCCCCG | CCGAGCGGGG | CGGGCGGGGG | AGGCACCCCC |
| AADN03001782             | -----      | -----      | -----      | -----      | -----      | -----      | -----      | -----      | -----      | -----      | -----      |
| JN639848                 | -----      | -----      | -----      | -----      | -----      | -----      | -----      | -----      | -----      | -----      | -----      |
| AADN03001670             | -----      | -----      | -----      | -----      | -----      | -----      | -----      | -----      | -----      | -----      | -----      |
| HQ873432                 | -----      | -----      | -----      | -----      | -----      | -----      | -----      | -----      | -----      | -----      | -----      |
| AADN03001774             | -----      | -----      | -----      | -----      | -----      | -----      | -----      | -----      | -----      | -----      | -----      |
| AADN03001775             | -----      | -----      | -----      | -----      | -----      | -----      | -----      | -----      | -----      | -----      | -----      |
| EF552813                 | -----      | -----      | -----      | -----      | -----      | -----      | -----      | -----      | -----      | -----      | -----      |
| AADN03022685             | -----      | -----      | -----      | -----      | -----      | -----      | -----      | -----      | -----      | -----      | -----      |
| AADN03019346             | -----      | -----      | -----      | -----      | -----      | -----      | -----      | -----      | -----      | -----      | -----      |
| AADN03001776             | -----      | -----      | -----      | -----      | -----      | -----      | -----      | -----      | -----      | -----      | -----      |
| DQ018756                 | -----      | -----      | -----      | -----      | -----      | -----      | -----      | -----      | -----      | -----      | -----      |
| AF173612                 | -----      | -----      | -----      | -----      | -----      | -----      | -----      | -----      | -----      | -----      | -----      |
| Gallus_gallus_KT445934.2 | CGCGGGCGGA | CGCTCCCCCG | AGGGGCGCCG | GGGCCGGCTG | GCGGGTGCCG | GGTCTCCCCT | CGGCGCCCCG | TCCCGCCCCG | CCGAGCGGGG | CGGGCGGGGG | AGGCACCCCC |
|                          | 4444444444 | 4444444444 | 4444444444 | 4444444444 | 4444444444 | 4444444444 | 4444444444 | 4444444444 | 4444444444 | 4444444444 | 4444444444 |
|                          | 7777777777 | 7777777777 | 7777777777 | 7777777777 | 7777777777 | 7777777777 | 7777777777 | 7777777778 | 8888888888 | 8888888888 | 8888888888 |
|                          | 3333333334 | 4444444445 | 5555555556 | 6666666667 | 7777777778 | 8888888889 | 9999999990 | 0000000001 | 1111111112 | 2222222223 | 3333333334 |
|                          | 1234567890 | 1234567890 | 1234567890 | 1234567890 | 1234567890 | 1234567890 | 1234567890 | 1234567890 | 1234567890 | 1234567890 | 1234567890 |
| AADN03001677             | -----      | -----      | -----      | -----      | -----      | -----      | -----      | -----      | -----      | -----      | -----      |
| AADN03001778             | -----      | -----      | -----      | -----      | -----      | -----      | -----      | -----      | -----      | -----      | -----      |
| AADN03001785             | -----      | -----      | -----      | -----      | -----      | -----      | -----      | -----      | -----      | -----      | -----      |
| AADN03001786             | -----      | -----      | -----      | -----      | -----      | -----      | -----      | -----      | -----      | -----      | -----      |
| AADN03001788             | -----      | -----      | -----      | -----      | -----      | -----      | -----      | -----      | -----      | -----      | -----      |
| AADN03014081             | -----      | -----      | -----      | -----      | -----      | -----      | -----      | -----      | -----      | -----      | -----      |
| AADN03015064             | -----      | -----      | -----      | -----      | -----      | -----      | -----      | -----      | -----      | -----      | -----      |
| AADN03026634             | -----      | -----      | -----      | -----      | -----      | -----      | -----      | -----      | -----      | -----      | -----      |
| NW_003775878             | -----      | -----      | -----      | -----      | -----      | -----      | -----      | -----      | -----      | -----      | -----      |
| DQ018752                 | -----      | -----      | -----      | -----      | -----      | -----      | -----      | -----      | -----      | -----      | -----      |
| DQ018757                 | -----      | -----      | -----      | -----      | -----      | -----      | -----      | -----      | -----      | -----      | -----      |
| DQ112354                 | -----      | -----      | -----      | -----      | -----      | -----      | -----      | -----      | -----      | -----      | -----      |
| FM165414                 | -----      | -----      | -----      | -----      | -----      | -----      | -----      | -----      | -----      | -----      | -----      |
| FM165415                 | -----      | -----      | -----      | -----      | -----      | -----      | -----      | -----      | -----      | -----      | -----      |
| AADN03000430             | GCGGGGCCTT | CGGGTCGTTT | CCCTCACCCC | AGGGCCAGGT | ACCTAGCGTC | CGCGCCTCCG | CGCGTCCGGG | GGGCGGGGAG | GAAGGAGCGC | GGCGCCGGTC | CCGAGCGGGC |
| AADN03001784             | -----      | -----      | -----      | -----      | -----      | -----      | -----      | -----      | -----      | -----      | -----      |
| AADN03001783             | -----      | -----      | -----      | -----      | -----      | -----      | -----      | -----      | -----      | -----      | -----      |
| DQ018754                 | GCGGGGCCTT | CGGGTCGTTT | CCCTCACCCC | AGGGCCAGGT | ACCTAGCGTC | CGCGCCTCCG | CGCGTCCGGG | GGGCGGGGAG | GAAGGAGCGC | GGCGCCGGTC | CCGAGCGGGC |
| AADN03001782             | -----      | -----      | -----      | -----      | -----      | -----      | -----      | -----      | -----      | -----      | -----      |
| JN639848                 | -----      | -----      | -----      | -----      | -----      | -----      | -----      | -----      | -----      | -----      | -----      |
| AADN03001670             | -----      | -----      | -----      | -----      | -----      | -----      | -----      | -----      | -----      | -----      | -----      |
| HQ873432                 | -----      | -----      | -----      | -----      | -----      | -----      | -----      | -----      | -----      | -----      | -----      |
| AADN03001774             | -----      | -----      | -----      | -----      | -----      | -----      | -----      | -----      | -----      | -----      | -----      |
| AADN03001775             | -----      | -----      | -----      | -----      | -----      | -----      | -----      | -----      | -----      | -----      | -----      |
| EF552813                 | -----      | -----      | -----      | -----      | -----      | -----      | -----      | -----      | -----      | -----      | -----      |
| AADN03022685             | -----      | -----      | -----      | -----      | -----      | -----      | -----      | -----      | -----      | -----      | -----      |
| AADN03019346             | -----      | -----      | -----      | -----      | -----      | -----      | -----      | -----      | -----      | -----      | -----      |
| AADN03001776             | -----      | -----      | -----      | -----      | -----      | -----      | -----      | -----      | -----      | -----      | -----      |
| DQ018756                 | -----      | -----      | -----      | -----      | -----      | -----      | -----      | -----      | -----      | -----      | -----      |
| AF173612                 | -----      | -----      | -----      | -----      | -----      | -----      | -----      | -----      | -----      | -----      | -----      |
| Gallus_gallus_KT445934.2 | GCGGGGCCTT | CGGGTCGTTT | CCCTCACCCC | AGGGCCAGGT | ACCTAGCGTC | CGCGCCTCCG | CGCGTCCGGG | GGGCGGGGAG | GAAGGAGCGC | GGCGCCGGTC | CCGAGCGGGC |



|                          |            |            |            |            |            |            |            |            |            |            |            |            |
|--------------------------|------------|------------|------------|------------|------------|------------|------------|------------|------------|------------|------------|------------|
| AADN03001784             | -----      | -----      | -----      | -----      | -----      | -----      | -----      | -----      | -----      | -----      | -----      | -----      |
| AADN03001783             | -----      | -----      | -----      | -----      | -----      | -----      | -----      | -----      | -----      | -----      | -----      | -----      |
| DQ018754                 | TCTGCCCGCC | GGC-----   | -----      | -----      | -----      | -----      | -----      | -----      | -----      | -----      | -----      | -----      |
| AADN03001782             | -----      | -----      | -----      | -----      | -----      | -----      | -----      | -----      | -----      | -----      | -----      | -----      |
| JN639848                 | -----      | -----      | -----      | -----      | -----      | -----      | -----      | -----      | -----      | -----      | -----      | -----      |
| AADN03001670             | -----      | -----      | -----      | -----      | -----      | -----      | -----      | -----      | -----      | -----      | -----      | -----      |
| HQ873432                 | -----      | -----      | -----      | -----      | -----      | -----      | -----      | -----      | -----      | -----      | -----      | -----      |
| AADN03001774             | -----      | -----      | -----      | -----      | -----      | -----      | -----      | -----      | -----      | -----      | -----      | -----      |
| AADN03001775             | -----      | -----      | -----      | -----      | -----      | -----      | -----      | -----      | -----      | -----      | -----      | -----      |
| EF552813                 | -----      | -----      | -----      | -----      | -----      | -----      | -----      | -----      | -----      | -----      | -----      | -----      |
| AADN03022685             | -----      | -----      | -----      | -----      | -----      | -----      | -----      | -----      | -----      | -----      | -----      | -----      |
| AADN03019346             | -----      | -----      | -----      | -----      | -----      | -----      | -----      | -----      | -----      | -----      | -----      | -----      |
| AADN03001776             | -----      | -----      | -----      | -----      | -----      | -----      | -----      | -----      | -----      | -----      | -----      | -----      |
| DQ018756                 | -----      | -----      | -----      | -----      | -----      | -----      | -----      | -----      | -----      | -----      | -----      | -----      |
| AF173612                 | -----      | -----      | -----      | -----      | -----      | -----      | -----      | -----      | -----      | -----      | -----      | -----      |
| Gallus_gallus_KT445934.2 | TCTGCCCGCC | GGCGGGACGC | CGGGATGGAA | GAGAGGACTC | CGGGCGGGGC | GCGGCGGCGC | GCCCCGCCGG | CCCTCTCCCT | CCCGAGCCCG | CCGGCGGCGT | CGGCCGTCGC | -----      |
|                          | 5555555555 | 5555555555 | 5555555555 | 5555555555 | 5555555555 | 5555555555 | 5555555555 | 5555555555 | 5555555555 | 5555555555 | 5555555555 | 5555555555 |
|                          | 0000000000 | 0000000000 | 0000000000 | 0000000001 | 1111111111 | 1111111111 | 1111111111 | 1111111111 | 1111111111 | 1111111111 | 1111111111 | 1111111111 |
|                          | 6666666667 | 7777777778 | 8888888889 | 9999999990 | 0000000001 | 1111111112 | 2222222223 | 3333333334 | 4444444445 | 5555555556 | 6666666667 | -----      |
|                          | 1234567890 | 1234567890 | 1234567890 | 1234567890 | 1234567890 | 1234567890 | 1234567890 | 1234567890 | 1234567890 | 1234567890 | 1234567890 | -----      |
| AADN03001677             | -----      | -----      | -----      | -----      | -----      | -----      | -----      | -----      | -----      | -----      | -----      | -----      |
| AADN03001778             | -----      | -----      | -----      | -----      | -----      | -----      | -----      | -----      | -----      | -----      | -----      | -----      |
| AADN03001785             | -----      | -----      | -----      | -----      | -----      | -----      | -----      | -----      | -----      | -----      | -----      | -----      |
| AADN03001786             | -----      | -----      | -----      | -----      | -----      | -----      | -----      | -----      | -----      | -----      | -----      | -----      |
| AADN03001788             | -----      | -----      | -----      | -----      | -----      | -----      | -----      | -----      | -----      | -----      | -----      | -----      |
| AADN03014081             | -----      | -----      | -----      | -----      | -----      | -----      | -----      | -----      | -----      | -----      | -----      | -----      |
| AADN03015064             | -----      | -----      | -----      | -----      | -----      | -----      | -----      | -----      | -----      | -----      | -----      | -----      |
| AADN03026634             | -----      | -----      | -----      | -----      | -----      | -----      | -----      | -----      | -----      | -----      | -----      | -----      |
| NW_003775878             | -----      | -----      | -----      | -----      | -----      | -----      | -----      | -----      | -----      | -----      | -----      | -----      |
| DQ018752                 | -----      | -----      | -----      | -----      | -----      | -----      | -----      | -----      | -----      | -----      | -----      | -----      |
| DQ018757                 | -----      | -----      | -----      | -----      | -----      | -----      | -----      | -----      | -----      | -----      | -----      | -----      |
| DQ112354                 | -----      | -----      | -----      | -----      | -----      | -----      | -----      | -----      | -----      | -----      | -----      | -----      |
| FM165414                 | -----      | -----      | -----      | -----      | -----      | -----      | -----      | -----      | -----      | -----      | -----      | -----      |
| FM165415                 | -----      | -----      | -----      | -----      | -----      | -----      | -----      | -----      | -----      | -----      | -----      | -----      |
| AADN03000430             | -----      | -----      | -----      | -----      | -----      | -----      | -----      | -----      | -----      | -----      | -----      | -----      |
| AADN03001784             | -----      | -----      | -----      | -----      | -----      | -----      | -----      | -----      | -----      | -----      | -----      | -----      |
| AADN03001783             | -----      | -----      | -----      | -----      | -----      | -----      | -----      | -----      | -----      | -----      | -----      | -----      |
| DQ018754                 | -----      | -----      | -----      | -----      | -----      | -----      | -----      | -----      | -----      | -----      | -----      | -----      |
| AADN03001782             | -----      | -----      | -----      | -----      | -----      | -----      | -----      | -----      | -----      | -----      | -----      | -----      |
| JN639848                 | -----      | -----      | -----      | -----      | -----      | -----      | -----      | -----      | -----      | -----      | -----      | -----      |
| AADN03001670             | -----      | -----      | -----      | -----      | -----      | -----      | -----      | -----      | -----      | -----      | -----      | -----      |
| HQ873432                 | -----      | -----      | -----      | -----      | -----      | -----      | -----      | -----      | -----      | -----      | -----      | -----      |
| AADN03001774             | -----      | -----      | -----      | -----      | -----      | -----      | -----      | -----      | -----      | -----      | -----      | -----      |
| AADN03001775             | -----      | -----      | -----      | -----      | -----      | -----      | -----      | -----      | -----      | -----      | -----      | -----      |
| EF552813                 | -----      | -----      | -----      | -----      | -----      | -----      | -----      | -----      | -----      | -----      | -----      | -----      |
| AADN03022685             | -----      | -----      | -----      | -----      | -----      | -----      | -----      | -----      | -----      | -----      | -----      | -----      |
| AADN03019346             | -----      | -----      | -----      | -----      | -----      | -----      | -----      | -----      | -----      | -----      | -----      | -----      |
| AADN03001776             | -----      | -----      | -----      | -----      | -----      | -----      | -----      | -----      | -----      | -----      | -----      | -----      |
| DQ018756                 | -----      | -----      | -----      | -----      | -----      | -----      | -----      | -----      | -----      | -----      | -----      | -----      |
| AF173612                 | -----      | -----      | -----      | -----      | -----      | -----      | -----      | -----      | -----      | -----      | -----      | -----      |
| Gallus_gallus_KT445934.2 | CGCGCCCTCG | GTCCTCCGCG | GGGCGGGCCC | GGGCCGAGAG | GGGGTTCATC | CCGTCCCCC  | TCTCCGCGGC | CTCGGTCTCG | GGCGGAGAGC | TCGGCGCGCG | CGCGGGCGCG | -----      |





|                          |            |            |            |            |            |            |            |            |            |            |            |            |
|--------------------------|------------|------------|------------|------------|------------|------------|------------|------------|------------|------------|------------|------------|
| AADN03001784             | -----      | -----      | -----      | -----      | -----      | -----      | -----      | -----      | -----      | -----      | -----      | -----      |
| AADN03001783             | -----      | -----      | -----      | -----      | -----      | -----      | -----      | -----      | -----      | -----      | -----      | -----      |
| DQ018754                 | -----      | -----      | -----      | -----      | -----      | -----      | -----      | -----      | -----      | -----      | -----      | -----      |
| AADN03001782             | -----      | -----      | -----      | -----      | -----      | -----      | -----      | -----      | -----      | -----      | -----      | -----      |
| JN639848                 | -----      | -----      | -----      | -----      | -----      | -----      | -----      | -----      | -----      | -----      | -----      | -----      |
| AADN03001670             | -----      | -----      | -----      | -----      | -----      | -----      | -----      | -----      | -----      | -----      | -----      | -----      |
| HQ873432                 | -----      | -----      | -----      | -----      | -----      | -----      | -----      | -----      | -----      | -----      | -----      | -----      |
| AADN03001774             | -----      | -----      | -----      | -----      | -----      | -----      | -----      | -----      | -----      | -----      | -----      | -----      |
| AADN03001775             | -----      | -----      | -----      | -----      | -----      | -----      | -----      | -----      | -----      | -----      | -----      | -----      |
| EF552813                 | -----      | -----      | -----      | -----      | -----      | -----      | -----      | -----      | -----      | -----      | -----      | -----      |
| AADN03022685             | -----      | -----      | -----      | -----      | -----      | -----      | -----      | -----      | -----      | -----      | -----      | -----      |
| AADN03019346             | -----      | -----      | -----      | -----      | -----      | -----      | -----      | -----      | -----      | -----      | -----      | -----      |
| AADN03001776             | -----      | -----      | -----      | -----      | -----      | -----      | -----      | -----      | -----      | -----      | -----      | -----      |
| DQ018756                 | -----      | -----      | -----      | -----      | -----      | -----      | -----      | -----      | -----      | -----      | -----      | -----      |
| AF173612                 | -----      | -----      | -----      | -----      | -----      | -----      | -----      | -----      | -----      | -----      | -----      | -----      |
| Gallus_gallus_KT445934.2 | CGGCCGCGG  | GACGGCGAGC | CGGCCGTCCC | GCCCGCGCCA | GCCGCGGCGC | CGGCCGGTTC | GCTCCGCCGG | TCCGCCCCGC | GTGCGTCCGC | ACGCCCGGCC | TCTTGCCCTC |            |
|                          | 5555555555 | 5555555555 | 5555555555 | 5555555555 | 5555555555 | 5555555555 | 5555555555 | 5555555555 | 5555555555 | 5555555555 | 5555555555 | 5555555555 |
|                          | 3333333334 | 4444444444 | 4444444444 | 4444444444 | 4444444444 | 4444444444 | 4444444444 | 4444444444 | 4444444444 | 4444444444 | 4444444444 | 4444444445 |
|                          | 9999999990 | 0000000001 | 1111111112 | 2222222223 | 3333333334 | 4444444445 | 5555555556 | 6666666667 | 7777777778 | 8888888889 | 9999999990 |            |
|                          | 1234567890 | 1234567890 | 1234567890 | 1234567890 | 1234567890 | 1234567890 | 1234567890 | 1234567890 | 1234567890 | 1234567890 | 1234567890 | 1234567890 |
| AADN03001677             | -----      | -----      | -----      | -----      | -----      | -----      | -----      | -----      | -----      | -----      | -----      | -----      |
| AADN03001778             | -----      | -----      | -----      | -----      | -----      | -----      | -----      | -----      | -----      | -----      | -----      | -----      |
| AADN03001785             | -----      | -----      | -----      | -----      | -----      | -----      | -----      | -----      | -----      | -----      | -----      | -----      |
| AADN03001786             | -----      | -----      | -----      | -----      | -----      | -----      | -----      | -----      | -----      | -----      | -----      | -----      |
| AADN03001788             | -----      | -----      | -----      | -----      | -----      | -----      | -----      | -----      | -----      | -----      | -----      | -----      |
| AADN03014081             | -----      | -----      | -----      | -----      | -----      | -----      | -----      | -----      | -----      | -----      | -----      | -----      |
| AADN03015064             | -----      | -----      | -----      | -----      | -----      | -----      | -----      | -----      | -----      | -----      | -----      | -----      |
| AADN03026634             | -----      | -----      | -----      | -----      | -----      | -----      | -----      | -----      | -----      | -----      | -----      | -----      |
| NW_003775878             | -----      | -----      | -----      | -----      | -----      | -----      | -----      | -----      | -----      | -----      | -----      | -----      |
| DQ018752                 | -----      | -----      | -----      | -----      | -----      | -----      | -----      | -----      | -----      | -----      | -----      | -----      |
| DQ018757                 | -----      | -----      | -----      | -----      | -----      | -----      | -----      | -----      | -----      | -----      | -----      | -----      |
| DQ112354                 | -----      | -----      | -----      | -----      | -----      | -----      | -----      | -----      | -----      | -----      | -----      | -----      |
| FM165414                 | -----      | -----      | -----      | -----      | -----      | -----      | -----      | -----      | -----      | -----      | -----      | -----      |
| FM165415                 | -----      | -----      | -----      | -----      | -----      | -----      | -----      | -----      | -----      | -----      | -----      | -----      |
| AADN03000430             | -----      | -----      | -----      | -----      | -----      | -----      | -----      | -----      | -----      | -----      | -----      | -----      |
| AADN03001784             | -----      | -----      | -----      | -----      | -----      | -----      | -----      | -----      | -----      | -----      | -----      | -----      |
| AADN03001783             | -----      | -----      | -----      | -----      | -----      | -----      | -----      | -----      | -----      | -----      | -----      | -----      |
| DQ018754                 | ---CGGGCCT | CGCCGGCCGT | TTCCCTTTC  | GTCGCAAGCC | GCGTCTCTC  | CTTCGTCCCC | GCCGCGGTGC | CCTTCCCACC | GCGCTT-CGC | C-TCGGCCTC | GCCGGCCGCG |            |
| AADN03001782             | -----      | -----      | -----      | -----      | -----      | -----      | -----      | -----      | -----      | -----      | -----      | -----      |
| JN639848                 | -----      | -----      | -----      | -----      | -----      | -----      | -----      | -----      | -----      | -----      | -----      | -----      |
| AADN03001670             | -----      | -----      | -----      | -----      | -----      | -----      | -----      | -----      | -----      | -----      | -----      | -----      |
| HQ873432                 | -----      | -----      | -----      | -----      | -----      | -----      | -----      | -----      | -----      | -----      | -----      | -----      |
| AADN03001774             | -----      | -----      | -----      | -----      | -----      | -----      | -----      | -----      | -----      | -----      | -----      | -----      |
| AADN03001775             | -----      | -----      | -----      | -----      | -----      | -----      | -----      | -----      | -----      | -----      | -----      | -----      |
| EF552813                 | -----      | -----      | -----      | -----      | -----      | -----      | -----      | -----      | -----      | -----      | -----      | -----      |
| AADN03022685             | -----      | -----      | -----      | -----      | -----      | -----      | -----      | -----      | -----      | -----      | -----      | -----      |
| AADN03019346             | -----      | -----      | -----      | -----      | -----      | -----      | -----      | -----      | -----      | -----      | -----      | -----      |
| AADN03001776             | -----      | -----      | -----      | -----      | -----      | -----      | -----      | -----      | -----      | -----      | -----      | -----      |
| DQ018756                 | -----      | -----      | -----      | -----      | -----      | -----      | -----      | -----      | -----      | -----      | -----      | -----      |
| AF173612                 | -----      | -----      | -----      | -----      | -----      | -----      | -----      | -----      | -----      | -----      | -----      | -----      |
| Gallus_gallus_KT445934.2 | CCTCGGGGCC | TCGCCGCCGT | TTCCCCCTTC | CGTCGCAAGC | GCGTCTCTC  | CCTTCGTCCC | CGCCGCCGTC | GCCTCCCACC | GCGCTTTCGC | CCTCGGCCTC | GCCGGCCGCG |            |



|                          |            |            |            |             |            |            |            |            |            |            |             |            |
|--------------------------|------------|------------|------------|-------------|------------|------------|------------|------------|------------|------------|-------------|------------|
| AADN03001784             | -----      | -----      | -----      | -----       | -----      | -----      | -----      | -----      | -----      | -----      | -----       | -----      |
| AADN03001783             | -----      | -----      | -----      | -----       | -----      | -----      | -----      | -----      | -----      | -----      | -----       | -----      |
| DQ018754                 | GTGCGCGCGT | CCGCCCGCGG | CGCGCCGCCA | GGGCGAGCGA  | GAGGAGGAGG | CGTCCGAGGA | CGAGGGGCGG | GGGAGGAAGG | TGAGAGGCGG | CGGGGGCGTT | TCGGTGC GCG | -----      |
| AADN03001782             | GTGCGCGCGT | CCGCCCGCGG | CGCGCCGCCA | GGGCGAGCGA  | GAGGAGGAGG | CGTCCGAGGA | CGAGGGGCGG | GGGAGGAAGG | TGAGAGGCGG | CGGGGGCGTT | TCGGTGC GCG | -----      |
| JN639848                 | -----      | -----      | -----      | -----       | -----      | -----      | -----      | -----      | -----      | -----      | -----       | -----      |
| AADN03001670             | GTGCGCGCGT | CCGCCCGCGG | CGCGCCGCCA | GGGCGAGCGA  | GAGGAGGAGG | CGTCCGAGGA | CGAGGGGCGG | GGGAGGAAGG | TGAGAGGCGG | CGGGGGCGTT | TCGGTGC GCG | -----      |
| HQ873432                 | -----      | -----      | -----      | -----       | -----      | -----      | -----      | -----      | -----      | -----      | -----       | -----      |
| AADN03001774             | -----      | -----      | -----      | -----       | -----      | -----      | -----      | -----      | -----      | -----      | -----       | -----      |
| AADN03001775             | -----      | -----      | -----      | -----       | -----      | -----      | -----      | -----      | -----      | -----      | -----       | -----      |
| EF552813                 | -----      | -----      | -----      | -----       | -----      | -----      | -----      | -----      | -----      | -----      | -----       | -----      |
| AADN03022685             | -----      | -----      | -----      | -----       | -----      | -----      | -----      | -----      | -----      | -----      | -----       | -----      |
| AADN03019346             | -----      | -----      | -----      | -----       | -----      | -----      | -----      | -----      | -----      | -----      | -----       | -----      |
| AADN03001776             | -----      | -----      | -----      | -----       | -----      | -----      | -----      | -----      | -----      | -----      | -----       | -----      |
| DQ018756                 | -----      | -----      | -----      | -----       | -----      | -----      | -----      | -----      | -----      | -----      | -----       | -----      |
| AF173612                 | -----      | -----      | -----      | -----       | -----      | -----      | -----      | -----      | -----      | -----      | -----       | -----      |
| Gallus_gallus_KT445934.2 | GTGCGCGCGT | CCGCCCGCGG | CGCGCCGCCA | GGGCGAGCGA  | GAGGAGGAGG | CGTCCGAGGA | CGAGGGGCGG | GGGAGGAAGG | TGAGAGGCGG | CGGGGGCGTT | TCGGTGC GCG | -----      |
|                          | 5555555555 | 5555555555 | 5555555555 | 5555555555  | 5555555555 | 5555555555 | 5555555555 | 5555555555 | 5555555555 | 5555555555 | 5555555555  | 5555555555 |
|                          | 7777777777 | 7777777777 | 7777777777 | 7777777777  | 7777777777 | 7777777777 | 7777777777 | 7777777777 | 7777777778 | 8888888888 | 8888888888  | 8888888888 |
|                          | 2222222223 | 3333333334 | 4444444445 | 5555555556  | 6666666667 | 7777777778 | 8888888889 | 9999999990 | 0000000001 | 1111111112 | 2222222223  | -----      |
|                          | 1234567890 | 1234567890 | 1234567890 | 1234567890  | 1234567890 | 1234567890 | 1234567890 | 1234567890 | 1234567890 | 1234567890 | 1234567890  | -----      |
| AADN03001677             | -----      | -----      | -----      | -----       | -----      | -----      | -----      | -----      | -----      | -----      | -----       | -----      |
| AADN03001778             | -----      | -----      | -----      | -----       | -----      | -----      | -----      | -----      | -----      | -----      | -----       | -----      |
| AADN03001785             | -----      | -----      | -----      | -----       | -----      | -----      | -----      | -----      | -----      | -----      | -----       | -----      |
| AADN03001786             | -----      | -----      | -----      | -----       | -----      | -----      | -----      | -----      | -----      | -----      | -----       | -----      |
| AADN03001788             | -----      | -----      | -----      | -----       | -----      | -----      | -----      | -----      | -----      | -----      | -----       | -----      |
| AADN03014081             | -----      | -----      | -----      | -----       | -----      | -----      | -----      | -----      | -----      | -----      | -----       | -----      |
| AADN03015064             | -----      | -----      | -----      | -----       | -----      | -----      | -----      | -----      | -----      | -----      | -----       | -----      |
| AADN03026634             | -----      | -----      | -----      | -----       | -----      | -----      | -----      | -----      | -----      | -----      | -----       | -----      |
| NW_003775878             | -----      | -----      | -----      | -----       | -----      | -----      | -----      | -----      | -----      | -----      | -----       | -----      |
| DQ018752                 | -----      | -----      | -----      | -----       | -----      | -----      | -----      | -----      | -----      | -----      | -----       | -----      |
| DQ018757                 | -----      | -----      | -----      | -----       | -----      | -----      | -----      | -----      | -----      | -----      | -----       | -----      |
| DQ112354                 | -----      | -----      | -----      | -----       | -----      | -----      | -----      | -----      | -----      | -----      | -----       | -----      |
| FM165414                 | -----      | -----      | -----      | -----       | -----      | -----      | -----      | -----      | -----      | -----      | -----       | -----      |
| FM165415                 | -----      | -----      | -----      | -----       | -----      | -----      | -----      | -----      | -----      | -----      | -----       | -----      |
| AADN03000430             | -----      | -----      | -----      | -----       | -----      | -----      | -----      | -----      | -----      | -----      | -----       | -----      |
| AADN03001784             | -----      | -----      | -----      | -----       | -----      | -----      | -----      | -----      | -----      | -----      | -----       | -----      |
| AADN03001783             | -----      | -----      | -----      | -----       | -----      | -----      | -----      | -----      | -----      | -----      | -----       | -----      |
| DQ018754                 | CGTCTCCCGC | ACGGCGAGGA | AGGGGCCGAG | GTCGGCGCGG  | GCGCCGTCGG | GCGGTCCGGC | GCGAGCGCGG | TCCGGCGGCG | CCGCCGGCGC | GGGCGGGGGC | CCGGTCTGCT  | -----      |
| AADN03001782             | CGTCTCCCGC | ACGGCGAGGA | AGGGGCCGAG | GTCGGTGC GG | GCGCCGTCGG | GCGGTCCGGC | GCGGGCGCGG | GCCGGCGGCG | CCGCCGGCGC | GGGCGGGGGC | CTGGTCTGCT  | -----      |
| JN639848                 | -----      | -----      | -----      | -----       | -----      | -----      | -----      | -----      | -----      | -----      | -----       | -----      |
| AADN03001670             | CGTCTCCCGC | ACGGCGAGGA | AGGGGCCGAG | GTCGGTGC GG | GCGCCGTCGG | GCGGTCCGGC | GCGGGCGCGG | TCCGGCGGCG | CCGCCGGCGC | GGGCGGGGGC | CTGGTCTGCT  | -----      |
| HQ873432                 | -----      | -----      | -----      | -----       | -----      | -----      | -----      | -----      | -----      | -----      | -----       | -----      |
| AADN03001774             | -----      | -----      | -----      | -----       | -----      | -----      | -----      | -----      | -----      | -----      | -----       | -----      |
| AADN03001775             | -----      | -----      | -----      | -----       | -----      | -----      | -----      | -----      | -----      | -----      | -----       | -----      |
| EF552813                 | -----      | -----      | -----      | -----       | -----      | -----      | -----      | -----      | -----      | -----      | -----       | -----      |
| AADN03022685             | -----      | -----      | -----      | -----       | -----      | -----      | -----      | -----      | -----      | -----      | -----       | -----      |
| AADN03019346             | -----      | -----      | -----      | -----       | -----      | -----      | -----      | -----      | -----      | -----      | -----       | -----      |
| AADN03001776             | -----      | -----      | -----      | -----       | -----      | -----      | -----      | -----      | -----      | -----      | -----       | -----      |
| DQ018756                 | -----      | -----      | -----      | -----       | -----      | -----      | -----      | -----      | -----      | -----      | -----       | -----      |
| AF173612                 | -----      | -----      | -----      | -----       | -----      | -----      | -----      | -----      | -----      | -----      | -----       | -----      |
| Gallus_gallus_KT445934.2 | CGTCTCCCGC | ACGGCGAGGA | AGGGGCCGAG | GTCGGCGCGG  | GCGCCGTCGG | GCGGTCCGGC | GCGGGCGCGG | GCCGGCGGCG | CCGCCGGCGC | GGGCGGGGGC | CTGGTCTGCT  | -----      |



|                          |            |            |            |            |            |             |            |            |            |             |            |
|--------------------------|------------|------------|------------|------------|------------|-------------|------------|------------|------------|-------------|------------|
| AADN03001784             | -----      | -----      | -----      | -----      | -----      | -----       | -----      | -----      | -----      | -----       | -----      |
| AADN03001783             | -----      | -----      | -----      | -----      | -----      | -----       | -----      | -----      | -----      | -----       | -----      |
| DQ018754                 | GGCCGGGCCG | AGCCGGGGCG | CTGGTCCGTC | CCCGAAGCGA | GACAGGGTCG | TTTCCCCCAGG | TCGGGAGCGA | GGGCTCCCCG | CCCTTCTCGT | TCGGGTTCGCG | CTTCATTGCC |
| AADN03001782             | -----      | -----      | -----      | -----      | -----      | -----       | -----      | -----      | -----      | -----       | -----      |
| JN639848                 | -----      | -----      | -----      | -----      | -----      | -----       | -----      | -----      | -----      | -----       | -----      |
| AADN03001670             | GGCCGGGCCG | AGCCGGGGCG | CTGGTCCGTC | CCCGAAGCGA | GACAGGGTCG | TTTCCCCCAGG | TCGGGAGCGA | GGGCTCCCCG | CCCTTCTCGT | TCGGGTTCGCT | TTTCATTGCC |
| HQ873432                 | -----      | -----      | -----      | -----      | -----      | -----       | -----      | -----      | -----      | -----       | -----      |
| AADN03001774             | -----      | -----      | -----      | -----      | -----      | -----       | -----      | -----      | -----      | -----       | -----      |
| AADN03001775             | -----      | -----      | -----      | -----      | -----      | -----       | -----      | -----      | -----      | -----       | -----      |
| EF552813                 | -----      | -----      | -----      | -----      | -----      | -----       | -----      | -----      | -----      | -----       | -----      |
| AADN03022685             | -----      | -----      | -----      | -----      | -----      | -----       | -----      | -----      | -----      | -----       | -----      |
| AADN03019346             | -----      | -----      | -----      | -----      | -----      | -----       | -----      | -----      | -----      | -----       | -----      |
| AADN03001776             | -----      | -----      | -----      | -----      | -----      | -----       | -----      | -----      | -----      | -----       | -----      |
| DQ018756                 | -----      | -----      | -----      | -----      | -----      | -----       | -----      | -----      | -----      | -----       | -----      |
| AF173612                 | -----      | -----      | -----      | -----      | -----      | -----       | -----      | -----      | -----      | -----       | -----      |
| Gallus_gallus_KT445934.2 | GGCCGGGCCG | AGCCGGGGCG | CTGGTCCGTC | CCCGAAGCGA | GACAGGGTCG | TTTCCCCCAGG | TCGGGAGCGA | GGGCTCCCCG | CCCTTCTCGT | TCGGGTTCGCG | CTTCATTGCC |
|                          | 6666666666 | 6666666666 | 6666666666 | 6666666666 | 6666666666 | 6666666666  | 6666666666 | 6666666666 | 6666666666 | 6666666666  | 6666666666 |
|                          | 0000000000 | 0000000000 | 0000000000 | 0000000000 | 0000000001 | 1111111111  | 1111111111 | 1111111111 | 1111111111 | 1111111111  | 1111111111 |
|                          | 5555555556 | 6666666667 | 7777777778 | 8888888889 | 9999999990 | 0000000001  | 1111111112 | 2222222223 | 3333333334 | 4444444445  | 5555555556 |
|                          | 1234567890 | 1234567890 | 1234567890 | 1234567890 | 1234567890 | 1234567890  | 1234567890 | 1234567890 | 1234567890 | 1234567890  | 1234567890 |
| AADN03001677             | -----      | -----      | -----      | -----      | -----      | -----       | -----      | -----      | -----      | -----       | -----      |
| AADN03001778             | -----      | -----      | -----      | -----      | -----      | -----       | -----      | -----      | -----      | -----       | -----      |
| AADN03001785             | -----      | -----      | -----      | -----      | -----      | -----       | -----      | -----      | -----      | -----       | -----      |
| AADN03001786             | -----      | -----      | -----      | -----      | -----      | -----       | -----      | -----      | -----      | -----       | -----      |
| AADN03001788             | -----      | -----      | -----      | -----      | -----      | -----       | -----      | -----      | -----      | -----       | -----      |
| AADN03014081             | -----      | -----      | -----      | -----      | -----      | -----       | -----      | -----      | -----      | -----       | -----      |
| AADN03015064             | -----      | -----      | -----      | -----      | -----      | -----       | -----      | -----      | -----      | -----       | -----      |
| AADN03026634             | -----      | -----      | -----      | -----      | -----      | -----       | -----      | -----      | -----      | -----       | -----      |
| NW_003775878             | -----      | -----      | -----      | -----      | -----      | -----       | -----      | -----      | -----      | -----       | -----      |
| DQ018752                 | -----      | -----      | -----      | -----      | -----      | -----       | -----      | -----      | -----      | -----       | -----      |
| DQ018757                 | -----      | -----      | -----      | -----      | -----      | -----       | -----      | -----      | -----      | -----       | -----      |
| DQ112354                 | -----      | -----      | -----      | -----      | -----      | -----       | -----      | -----      | -----      | -----       | -----      |
| FM165414                 | -----      | -----      | -----      | -----      | -----      | -----       | -----      | -----      | -----      | -----       | -----      |
| FM165415                 | -----      | -----      | -----      | -----      | -----      | -----       | -----      | -----      | -----      | -----       | -----      |
| AADN03000430             | -----      | -----      | -----      | -----      | -----      | -----       | -----      | -----      | -----      | -----       | -----      |
| AADN03001784             | -----      | -----      | -----      | -----      | -----      | -----       | -----      | -----      | -----      | -----       | -----      |
| AADN03001783             | -----      | -----      | -----      | -----      | -----      | -----       | -----      | -----      | -----      | -----       | -----      |
| DQ018754                 | GGCCGGGCCG | -----TCG   | CCGGCTTTTT | TTT-CCCTCC | CGCATCCGAT | ATTCGTGTGC  | TCGTACGGTC | AGCGGAGGCG | ACGCTCGTCC | GCCCCGCGGT  | CGCCCCGGCG |
| AADN03001782             | -----      | -----      | -----      | -----      | -----      | -----       | -----      | -----      | -----      | -----       | -----      |
| JN639848                 | -----      | -----      | -----      | -----      | -----      | -----       | -----      | -----      | -----      | -----       | -----      |
| AADN03001670             | GGCCGGGCCG | -----TCG   | CCGGCTTTTT | TTTTCCCTCC | CGCATCCGAT | ATTCGTGTGC  | TCGTACGGTC | AGCGGAGGCG | ACGCTCGTCC | GCCCCGCGGT  | CGCCCCGGCG |
| HQ873432                 | -----      | -----      | -----      | -----      | -----      | -----       | -----      | -----      | -----      | -----       | -----      |
| AADN03001774             | -----      | -----      | -----      | -----      | -----      | -----       | -----      | -----      | -----      | -----       | -----      |
| AADN03001775             | -----      | -----      | -----      | -----      | -----      | -----       | -----      | -----      | -----      | -----       | -----      |
| EF552813                 | -----      | -----      | -----      | -----      | -----      | -----       | -----      | -----      | -----      | -----       | -----      |
| AADN03022685             | -----      | -----      | -----      | -----      | -----      | -----       | -----      | -----      | -----      | -----       | -----      |
| AADN03019346             | -----      | -----      | -----      | -----      | -----      | -----       | -----      | -----      | -----      | -----       | -----      |
| AADN03001776             | -----      | -----      | -----      | -----      | -----      | -----       | -----      | -----      | -----      | -----       | -----      |
| DQ018756                 | -----      | -----      | -----      | -----      | -----      | -----       | -----      | -----      | -----      | -----       | -----      |
| AF173612                 | -----      | -----      | -----      | -----      | -----      | -----       | -----      | -----      | -----      | -----       | -----      |
| Gallus_gallus_KT445934.2 | GGCCGGGCCG | CCGGCCGTCG | CCGGCTTTTT | TTTTCCCTCC | CGCATCCGAT | ATTCGTGTGC  | TCGTACGGTC | AGCGGAGGCG | ACGCTCGTCC | GCCCCGCGGT  | CGCCCCGGCG |



|                          |            |            |            |            |            |            |            |            |            |            |            |            |
|--------------------------|------------|------------|------------|------------|------------|------------|------------|------------|------------|------------|------------|------------|
| AADN03001784             | -----      | -----      | -----      | -----      | -----      | -----      | -----      | -----      | -----      | -----      | -----      | -----      |
| AADN03001783             | GTGGATCACT | CGGCTCGTGC | GTCGATGAAG | AACGCAGCTA | GCTGCGAGAA | TTAATGTGAA | TTGCAGGACA | CATTGATCAT | CGACACTTCG | AACGCACTTG | CGGCCCGGG  |            |
| DQ018754                 | GTGGATCACT | CGGCTCGTGC | G-CGATGAAG | AACGCAGCTA | GCTGCGAGAA | CTAATGTGAA | TTGCAGGACA | CATTGATCAT | CGACACTTCG | AA-----    | -----      |            |
| AADN03001782             | -----      | -----      | -----      | -----      | -----      | -----      | -----      | -----      | -----      | -----      | -----      |            |
| JN639848                 | -----      | -----      | -----      | -----      | -----      | -----      | -----      | -----      | -----      | -----      | -----      |            |
| AADN03001670             | GTGGATCACT | CGGCTCGTGC | GTCGATGAAG | AACGCAGCTA | GCTGCGAGAA | TTAATGTGAA | TTGCAGGACA | CATTGATCAT | CGACACTTCG | AACGCACTTG | CGGCCCGGG  |            |
| HQ873432                 | -----      | -----      | -----      | -----      | -----      | -----      | -----      | -----      | -----      | -----      | -----      |            |
| AADN03001774             | -----      | -----      | -----      | -----      | -----      | -----      | -----      | -----      | -----      | -----      | -----      |            |
| AADN03001775             | -----      | -----      | -----      | -----      | -----      | -----      | -----      | -----      | -----      | -----      | -----      |            |
| EF552813                 | -----      | -----      | -----      | -----      | -----      | -----      | -----      | -----      | -----      | -----      | -----      |            |
| AADN03022685             | -----      | -----      | -----      | -----      | -----      | -----      | -----      | -----      | -----      | -----      | -----      |            |
| AADN03019346             | -----      | -----      | -----      | -----      | -----      | -----      | -----      | -----      | -----      | -----      | -----      |            |
| AADN03001776             | -----      | -----      | -----      | -----      | -----      | -----      | -----      | -----      | -----      | -----      | -----      |            |
| DQ018756                 | -----      | -----      | -----      | -----      | -----      | -----      | -----      | -----      | -----      | -----      | -----      |            |
| AF173612                 | -----      | -----      | -----      | -----      | -----      | -----      | -----      | -----      | -----      | -----      | -----      |            |
| Gallus_gallus_KT445934.2 | GTGGATCACT | CGGCTCGTGC | GTCGATGAAG | AACGCAGCTA | GCTGCGAGAA | TTAATGTGAA | TTGCAGGACA | CATTGATCAT | CGACACTTCG | AACGCACTTG | CGGCCCGGG  |            |
|                          | 6666666666 | 6666666666 | 6666666666 | 6666666666 | 6666666666 | 6666666666 | 6666666666 | 6666666666 | 6666666666 | 6666666666 | 6666666666 | 6666666666 |
|                          | 3333333333 | 3333333333 | 4444444444 | 4444444444 | 4444444444 | 4444444444 | 4444444444 | 4444444444 | 4444444444 | 4444444444 | 4444444444 | 4444444444 |
|                          | 8888888888 | 9999999999 | 0000000001 | 1111111112 | 2222222223 | 3333333334 | 4444444445 | 5555555556 | 6666666667 | 7777777778 | 8888888889 | 8888888889 |
|                          | 1234567890 | 1234567890 | 1234567890 | 1234567890 | 1234567890 | 1234567890 | 1234567890 | 1234567890 | 1234567890 | 1234567890 | 1234567890 | 1234567890 |
| AADN03001677             | -----      | -----      | -----      | -----      | -----      | -----      | -----      | -----      | -----      | -----      | -----      |            |
| AADN03001778             | -----      | -----      | -----      | -----      | -----      | -----      | -----      | -----      | -----      | -----      | -----      |            |
| AADN03001785             | -----      | -----      | -----      | -----      | -----      | -----      | -----      | -----      | -----      | -----      | -----      |            |
| AADN03001786             | -----      | -----      | -----      | -----      | -----      | -----      | -----      | -----      | -----      | -----      | -----      |            |
| AADN03001788             | -----      | -----      | -----      | -----      | -----      | -----      | -----      | -----      | -----      | -----      | -----      |            |
| AADN03014081             | -----      | -----      | -----      | -----      | -----      | -----      | -----      | -----      | -----      | -----      | -----      |            |
| AADN03015064             | -----      | -----      | -----      | -----      | -----      | -----      | -----      | -----      | -----      | -----      | -----      |            |
| AADN03026634             | -----      | -----      | -----      | -----      | -----      | -----      | -----      | -----      | -----      | -----      | -----      |            |
| NW_003775878             | -----      | -----      | -----      | -----      | -----      | -----      | -----      | -----      | -----      | -----      | -----      |            |
| DQ018752                 | -----      | -----      | -----      | -----      | -----      | -----      | -----      | -----      | -----      | -----      | -----      |            |
| DQ018757                 | -----      | -----      | -----      | -----      | -----      | -----      | -----      | -----      | -----      | -----      | -----      |            |
| DQ112354                 | -----      | -----      | -----      | -----      | -----      | -----      | -----      | -----      | -----      | -----      | -----      |            |
| FM165414                 | -----      | -----      | -----      | -----      | -----      | -----      | -----      | -----      | -----      | -----      | -----      |            |
| FM165415                 | -----      | -----      | -----      | -----      | -----      | -----      | -----      | -----      | -----      | -----      | -----      |            |
| AADN03000430             | -----      | -----      | -----      | -----      | -----      | -----      | -----      | -----      | -----      | -----      | -----      |            |
| AADN03001784             | -----      | -----      | -----      | -----      | -----      | -----      | -----      | -----      | -----      | -----      | -----      |            |
| AADN03001783             | TTCTCCCGG  | GGCTACGCCT | GCCTGAGCGT | CGCTTGACGG | TCAATCGCCG | ACGGCCCGCG | TCCGCGGCGG | CCGCGGCGCG | CGGCTGGGGC | GCCTCGCAGG | CCCGCGCGCC |            |
| DQ018754                 | -----      | -----      | -----      | -----      | -----      | -----      | -----      | -----      | -----      | -----      | -----      |            |
| AADN03001782             | -----      | -----      | -----      | -----      | -----      | -----      | -----      | -----      | -----      | -----      | -----      |            |
| JN639848                 | -----      | -----      | -----      | -----      | -----      | -----      | -----      | -----      | -----      | -----      | -----      |            |
| AADN03001670             | TTCTCCCGG  | GGCTACGCCT | GCC-----   | -----      | -----      | -----      | -----      | -----      | -----      | -----      | -----      |            |
| HQ873432                 | -----      | -----      | -----      | -----      | -----      | -----      | -----      | -----      | -----      | -----      | -----      |            |
| AADN03001774             | -----      | -----      | -----      | -----      | -----      | -----      | -----      | -----      | -----      | -----      | -----      |            |
| AADN03001775             | -----      | -----      | -----      | -----      | -----      | -----      | -----      | -----      | -----      | -----      | -----      |            |
| EF552813                 | -----      | -----      | -----      | -----      | -----      | -----      | -----      | -----      | -----      | -----      | -----      |            |
| AADN03022685             | -----      | -----      | -----      | -----      | -----      | -----      | -----      | -----      | -----      | -----      | -----      |            |
| AADN03019346             | -----      | -----      | -----      | -----      | -----      | -----      | -----      | -----      | -----      | -----      | -----      |            |
| AADN03001776             | -----      | -----      | -----      | -----      | -----      | -----      | -----      | -----      | -----      | -----      | -----      |            |
| DQ018756                 | -----      | -----      | -----      | -----      | -----      | -----      | -----      | -----      | -----      | -----      | -----      |            |
| AF173612                 | -----      | -----      | -----      | -----      | -----      | -----      | -----      | -----      | -----      | -----      | -----      |            |
| Gallus_gallus_KT445934.2 | TTCTCCCGG  | GGCTACGCCT | GCCTGAGCGT | CGCTTGACGG | TCAATCGCCG | ATGGCCCGCG | TCCGCGGCGG | CCGCGGCGCG | CGGCTGGGGC | GCCTCGCAGG | CCCGCGCGCC |            |





|                          |            |            |            |            |            |             |            |            |            |            |            |            |
|--------------------------|------------|------------|------------|------------|------------|-------------|------------|------------|------------|------------|------------|------------|
| AADN03001784             | -----      | -----      | -----      | -----      | -----      | -----       | -----      | -----      | -----      | -----      | -----      | -----      |
| AADN03001783             | GTCGCGCCGC | GGGCCTTCGT | CCCCCTAAGT | GGAGACCCAG | GTCGGGGAGC | TCGCCGAGCT  | CCCCGCGCTC | CCGGAGCGCC | CGCTTTGGCC | GAGCTCGTCC | CCACGGGGCG |            |
| DQ018754                 | -----      | -----      | -----      | -----      | -----      | -----       | -----      | -----      | -----      | -----      | -----      | -----      |
| AADN03001782             | -----      | -----      | -----      | -----      | -----      | -----       | -----      | -----      | -----      | -----      | -----      | -----      |
| JN639848                 | -----      | -----      | -----      | -----      | -----      | -----       | -----      | -----      | -----      | -----      | -----      | -----      |
| AADN03001670             | -----      | -----      | -----      | -----      | -----      | -----       | -----      | -----      | -----      | -----      | -----      | -----      |
| HQ873432                 | -----      | -----      | -----      | -----      | -----      | -----       | -----      | -----      | -----      | -----      | -----      | -----      |
| AADN03001774             | -----      | -----      | -----      | -----      | -----      | -----       | -----      | -----      | -----      | -----      | -----      | -----      |
| AADN03001775             | -----      | -----      | -----      | -----      | -----      | -----       | -----      | -----      | -----      | -----      | -----      | -----      |
| EF552813                 | -----      | -----      | -----      | -----      | -----      | -----       | -----      | -----      | -----      | -----      | -----      | -----      |
| AADN03022685             | -----      | -----      | -----      | -----      | -----      | -----       | -----      | -----      | -----      | -----      | -----      | -----      |
| AADN03019346             | -----      | -----      | -----      | -----      | -----      | -----       | -----      | -----      | -----      | -----      | -----      | -----      |
| AADN03001776             | -----      | -----      | -----      | -----      | -----      | -----       | -----      | -----      | -----      | -----      | -----      | -----      |
| DQ018756                 | -----      | -----      | -----      | -----      | -----      | -----       | -----      | -----      | -----      | -----      | -----      | -----      |
| AF173612                 | -----      | -----      | -----      | -----      | -----      | -----       | -----      | -----      | -----      | -----      | -----      | -----      |
| Gallus_gallus_KT445934.2 | GTCGCGCCGC | GGGCCTTCGT | CCCCCTAAGT | GGAGACCCAG | GTCGGGGAGC | TCGCCGAGCT  | CCCCGCGCTC | CCGGAGCGCC | CGCTTTGGCC | GAGCTCGTCC | CCACGGGGCG |            |
|                          | 6666666666 | 6666666666 | 6666666666 | 6666666666 | 6666666666 | 6666666666  | 6666666666 | 6666666666 | 6666666666 | 6666666666 | 6666666666 | 6666666666 |
|                          | 7777777777 | 7777777777 | 7777777777 | 7777777777 | 7777777777 | 7777777777  | 7777777777 | 7777777777 | 7777777777 | 7777777778 | 8888888888 | 8888888888 |
|                          | 1111111112 | 2222222223 | 3333333334 | 4444444445 | 5555555556 | 6666666667  | 7777777778 | 8888888889 | 9999999990 | 0000000001 | 1111111112 |            |
|                          | 1234567890 | 1234567890 | 1234567890 | 1234567890 | 1234567890 | 1234567890  | 1234567890 | 1234567890 | 1234567890 | 1234567890 | 1234567890 | 1234567890 |
| AADN03001677             | -----      | -----      | -----      | -----      | -----      | -----       | -----      | -----      | -----      | -----      | -----      | -----      |
| AADN03001778             | -----      | -----      | -----      | -----      | -----      | -----       | -----      | -----      | -----      | -----      | -----      | -----      |
| AADN03001785             | -----      | -----      | -----      | -----      | -----      | -----       | -----      | -----      | -----      | -----      | -----      | -----      |
| AADN03001786             | -----      | -----      | -----      | -----      | -----      | -----       | -----      | -----      | -----      | -----      | -----      | -----      |
| AADN03001788             | -----      | -----      | -----      | -----      | -----      | -----       | -----      | -----      | -----      | -----      | -----      | -----      |
| AADN03014081             | -----      | -----      | -----      | -----      | -----      | -----       | -----      | -----      | -----      | -----      | -----      | -----      |
| AADN03015064             | -----      | -----      | -----      | -----      | -----      | -----       | -----      | -----      | -----      | -----      | -----      | -----      |
| AADN03026634             | -----      | -----      | -----      | -----      | -----      | -----       | -----      | -----      | -----      | -----      | -----      | -----      |
| NW_003775878             | -----      | -----      | -----      | -----      | -----      | -----       | -----      | -----      | -----      | -----      | -----      | -----      |
| DQ018752                 | -----      | -----      | -----      | -----      | -----      | -----       | -----      | -----      | -----      | -----      | -----      | -----      |
| DQ018757                 | -----      | -----      | -----      | -----      | -----      | -----       | -----      | -----      | -----      | -----      | -----      | -----      |
| DQ112354                 | -----      | -----      | -----      | -----      | -----      | -----       | -----      | -----      | -----      | -----      | -----      | -----      |
| FM165414                 | -----      | -----      | -----      | -----      | -----      | -----       | -----      | -----      | -----      | -----      | -----      | -----      |
| FM165415                 | -----      | -----      | -----      | -----      | -----      | -----       | -----      | -----      | -----      | -----      | -----      | -----      |
| AADN03000430             | -----      | -----      | -----      | -----      | -----      | -----       | -----      | -----      | -----      | -----      | -----      | -----      |
| AADN03001784             | -----      | -----      | -----      | -----      | -----      | -----       | -----      | -----      | -----      | -----      | -----      | -----      |
| AADN03001783             | GCCGGGCTTT | CCGGTCGGTC | GCGCGGCGCA | GCGCGGCGGG | GCCGGACGTT | CGTTCGTTTCG | TTCGTCCGGC | CCCCGCCCC  | GGAGGAGCGC | ACCTCGCCCT | CCCCGGCCCC |            |
| DQ018754                 | -----      | -----      | -----      | -----      | -----      | -----       | -----      | -----      | -----      | -----      | -----      | -----      |
| AADN03001782             | -----      | -----      | -----      | -----      | -----      | -----       | -----      | -----      | -----      | -----      | -----      | -----      |
| JN639848                 | -----      | -----      | -----      | -----      | -----      | -----       | -----      | -----      | -----      | -----      | -----      | -----      |
| AADN03001670             | -----      | -----      | -----      | -----      | -----      | -----       | -----      | -----      | -----      | -----      | -----      | -----      |
| HQ873432                 | -----      | -----      | -----      | -----      | -----      | -----       | -----      | -----      | -----      | -----      | -----      | -----      |
| AADN03001774             | -----      | -----      | -----      | -----      | -----      | -----       | -----      | -----      | -----      | -----      | -----      | -----      |
| AADN03001775             | -----      | -----      | -----      | -----      | -----      | -----       | -----      | -----      | -----      | -----      | -----      | -----      |
| EF552813                 | -----      | -----      | -----      | -----      | -----      | -----       | -----      | -----      | -----      | -----      | -----      | -----      |
| AADN03022685             | -----      | -----      | -----      | -----      | -----      | -----       | -----      | -----      | -----      | -----      | -----      | -----      |
| AADN03019346             | -----      | -----      | -----      | -----      | -----      | -----       | -----      | -----      | -----      | -----      | -----      | -----      |
| AADN03001776             | -----      | -----      | -----      | -----      | -----      | -----       | -----      | -----      | -----      | -----      | -----      | -----      |
| DQ018756                 | -----      | -----      | -----      | -----      | -----      | -----       | -----      | -----      | -----      | -----      | -----      | -----      |
| AF173612                 | -----      | -----      | -----      | -----      | -----      | -----       | -----      | -----      | -----      | -----      | -----      | -----      |
| Gallus_gallus_KT445934.2 | GCCGGGCTTT | CCGGTCGGTC | GCGCGGCGCA | GCGCGGCGGG | GCCGGACGTT | CGTTCGTTTCG | TTCGTCCGGC | CCCCGCCCC  | GGAGGAGCGC | TCCTCGCCCT | CCCCGGCCCC |            |



|                          |            |            |            |            |            |            |            |            |            |            |            |
|--------------------------|------------|------------|------------|------------|------------|------------|------------|------------|------------|------------|------------|
| AADN03001784             | CCGTCCGGCC | GAGCCCGGCG | CGCGTCCCCG | CGGGTCCGTC | TCCGGCCACC | GTGCGCCGGC | GGCGGCGGCG | GCGGTGCGAA | CCGCCGGCGG | CGCGCCGGCT | CCCCCGTCCG |
| AADN03001783             | CCGTCCGGCC | GAGCCCGGCG | CGCGTCCCCG | CGGGTCCGTC | TCCGGCCACC | GTGCGCCGGC | GGCGGCGGCG | GCGGTGCGAA | CCGCCGGCGG | CGCGCCGGCT | CCCCCGTCCG |
| DQ018754                 | -----      | -----      | -----      | -----      | -----      | -----      | -----      | -----      | -----      | -----      | -----      |
| AADN03001782             | -----      | -----      | -----      | -----      | -----      | -----      | -----      | -----      | -----      | -----      | -----      |
| JN639848                 | -----      | -----      | -----      | -----      | -----      | -----      | -----      | -----      | -----      | -----      | -----      |
| AADN03001670             | -----      | -----      | -----      | -----      | -----      | -----      | -----      | -----      | -----      | -----      | -----      |
| HQ873432                 | -----      | -----      | -----      | -----      | -----      | -----      | -----      | -----      | -----      | -----      | -----      |
| AADN03001774             | -----      | -----      | -----      | -----      | -----      | -----      | -----      | -----      | -----      | -----      | -----      |
| AADN03001775             | -----      | -----      | -----      | -----      | -----      | -----      | -----      | -----      | -----      | -----      | -----      |
| EF552813                 | -----      | -----      | -----      | -----      | -----      | -----      | -----      | -----      | -----      | -----      | -----      |
| AADN03022685             | -----      | -----      | -----      | -----      | -----      | -----      | -----      | -----      | -----      | -----      | -----      |
| AADN03019346             | -----      | -----      | -----      | -----      | -----      | -----      | -----      | -----      | -----      | -----      | -----      |
| AADN03001776             | -----      | -----      | -----      | -----      | -----      | -----      | -----      | -----      | -----      | -----      | -----      |
| DQ018756                 | -----      | -----      | -----      | -----      | -----      | -----      | -----      | -----      | -----      | -----      | -----      |
| AF173612                 | -----      | -----      | -----      | -----      | -----      | -----      | -----      | -----      | -----      | -----      | -----      |
| Gallus_gallus_KT445934.2 | CCGTCCGGCC | GAGCCCGGCG | CGCGTCCCCG | CGGGTCCGTC | TCCGGCCACC | GTGCGCCGGC | GGCGGCGGCG | GCGGTGCGAA | CCGCCGGCGG | CGCGCCGGCT | CCCCCGTCCG |
|                          | 7777777777 | 7777777777 | 7777777777 | 7777777777 | 7777777777 | 7777777777 | 7777777777 | 7777777777 | 7777777777 | 7777777777 | 7777777777 |
|                          | 0000000000 | 0000000000 | 0000000000 | 0000000000 | 0000000000 | 0000000001 | 1111111111 | 1111111111 | 1111111111 | 1111111111 | 1111111111 |
|                          | 4444444445 | 5555555556 | 6666666667 | 7777777778 | 8888888889 | 9999999990 | 0000000001 | 1111111112 | 2222222223 | 3333333334 | 4444444445 |
|                          | 1234567890 | 1234567890 | 1234567890 | 1234567890 | 1234567890 | 1234567890 | 1234567890 | 1234567890 | 1234567890 | 1234567890 | 1234567890 |
| AADN03001677             | -----      | -----      | -----      | -----      | -----      | -----      | -----      | -----      | -----      | -----      | -----      |
| AADN03001778             | -----      | -----      | -----      | -----      | -----      | -----      | -----      | -----      | -----      | -----      | -----      |
| AADN03001785             | -----      | -----      | -----      | -----      | -----      | -----      | -----      | -----      | -----      | -----      | -----      |
| AADN03001786             | -----      | -----      | -----      | -----      | -----      | -----      | -----      | -----      | -----      | -----      | -----      |
| AADN03001788             | -----      | -----      | -----      | -----      | -----      | -----      | -----      | -----      | -----      | -----      | -----      |
| AADN03014081             | -----      | -----      | -----      | -----      | -----      | -----      | -----      | -----      | -----      | -----      | -----      |
| AADN03015064             | -----      | -----      | -----      | -----      | -----      | -----      | -----      | -----      | -----      | -----      | -----      |
| AADN03026634             | -----      | -----      | -----      | -----      | -----      | -----      | -----      | -----      | -----      | -----      | -----      |
| NW_003775878             | -----      | -----      | -----      | -----      | -----      | -----      | -----      | -----      | -----      | -----      | -----      |
| DQ018752                 | -----      | -----      | -----      | -----      | -----      | -----      | -----      | -----      | -----      | -----      | -----      |
| DQ018757                 | -----      | -----      | -----      | -----      | -----      | -----      | -----      | -----      | -----      | -----      | -----      |
| DQ112354                 | -----      | -----      | -----      | -----      | -----      | -----      | -----      | -----      | -----      | -----      | -----      |
| FM165414                 | -----      | -----      | -----      | -----      | -----      | -----      | -----      | -----      | -----      | -----      | -----      |
| FM165415                 | -----      | -----      | -----      | -----      | -----      | -----      | -----      | -----      | -----      | -----      | -----      |
| AADN03000430             | -----      | -----      | -----      | -----      | -----      | -----      | -----      | -----      | -----      | -----      | -----      |
| AADN03001784             | GGCGTTCCTC | CCTCGGCAGC | GCCGGGAGCA | GCCGCTTGCC | GTCCGAAGGC | GGGTGGCCCG | GCGAGCGCGG | GCTCGCCCGG | GGCCCGGCGT | TCGGGCCCCG | TTTTCCGATC |
| AADN03001783             | GGCGT----- | -----      | -----      | -----      | -----      | -----      | -----      | -----      | -----      | -----      | -----      |
| DQ018754                 | -----      | -----      | -----      | -----      | -----      | -----      | -----      | -----      | -----      | -----      | -----      |
| AADN03001782             | -----      | -----      | -----      | -----      | -----      | -----      | -----      | -----      | -----      | -----      | -----      |
| JN639848                 | -----      | -----      | -----      | -----      | -----      | -----      | -----      | -----      | -----      | -----      | -----      |
| AADN03001670             | -----      | -----      | -----      | -----      | -----      | -----      | -----      | -----      | -----      | -----      | -----      |
| HQ873432                 | -----      | -----      | -----      | -----      | -----      | -----      | -----      | -----      | -----      | -----      | -----      |
| AADN03001774             | -----      | -----      | -----      | -----      | -----      | -----      | -----      | -----      | -----      | -----      | -----      |
| AADN03001775             | -----      | -----      | -----      | -----      | -----      | -----      | -----      | -----      | -----      | -----      | -----      |
| EF552813                 | -----      | -----      | -----      | -----      | -----      | -----      | -----      | -----      | -----      | -----      | -----      |
| AADN03022685             | -----      | -----      | -----      | -----      | -----      | -----      | -----      | -----      | -----      | -----      | -----      |
| AADN03019346             | -----      | -----      | -----      | -----      | -----      | -----      | -----      | -----      | -----      | -----      | -----      |
| AADN03001776             | -----      | -----      | -----      | -----      | -----      | -----      | -----      | -----      | -----      | -----      | -----      |
| DQ018756                 | -----      | -----      | -----      | -----      | -----      | -----      | -----      | -----      | -----      | -----      | -----      |
| AF173612                 | -----      | -----      | -----      | -----      | -----      | -----      | -----      | -----      | -----      | -----      | -----      |
| Gallus_gallus_KT445934.2 | GGCGTTCCTC | CCTCGGCAGC | GCCGGGAGCA | GCCGCTTGCC | GTCCGAAGGC | GGGTGGCCCG | GCGAGCGCGG | GCTCGCCCGG | GGCCCGGCGT | TCGGGCCCCG | TTT-CCGATC |



|                          |            |            |            |            |            |            |            |            |            |            |            |
|--------------------------|------------|------------|------------|------------|------------|------------|------------|------------|------------|------------|------------|
| AADN03001784             | CAGCGCCGAA | TCCCCGCCCC | GCGGTGGGGC | GCGGGAGGTG | TGGCGTACGG | AAGCCCCCAT | CCCCGGCGCC | GCTCTCGGGG | GGCCCAAGTC | CTTCTGATCG | AGGCCAGCC  |
| AADN03001783             | -----      | -----      | -----      | -----      | -----      | -----      | -----      | -----      | -----      | -----      | -----      |
| DQ018754                 | -----      | -----      | -----      | -----      | -----      | -----      | -----      | -----      | -----      | -----      | -----      |
| AADN03001782             | -----      | -----      | -----      | -----      | -----      | -----      | -----      | -----      | -----      | -----      | -----      |
| JN639848                 | -----      | -----      | -----      | -----      | -----      | -----      | -----      | -----      | -----      | -----      | -----      |
| AADN03001670             | -----      | -----      | -----      | -----      | -----      | -----      | -----      | -----      | -----      | -----      | -----      |
| HQ873432                 | -----      | -----      | -----      | -----      | -----      | -----      | -----      | -----      | -----      | -----      | -----      |
| AADN03001774             | -----      | -----      | -----      | -----      | -----      | -----      | -----      | -----      | -----      | -----      | -----      |
| AADN03001775             | -----      | -----      | -----      | -----      | -----      | -----      | -----      | -----      | -----      | -----      | -----      |
| EF552813                 | -----      | -----      | -----      | -----      | -----      | -----      | -----      | -----      | -----      | -----      | -----      |
| AADN03022685             | -----      | -----      | -----      | -----      | -----      | -----      | -----      | -----      | -----      | -----      | -----      |
| AADN03019346             | -----      | -----      | -----      | -----      | -----      | -----      | -----      | -----      | -----      | -----      | -----      |
| AADN03001776             | -----      | -----      | -----      | -----      | -----      | -----      | -----      | -----      | -----      | -----      | -----      |
| DQ018756                 | -----      | -----      | -CGGTGGGGC | GCGGGAGGTG | TGGCGTACGG | AAGCCCCCAT | CCCCGGCGCC | GCTCTCGGGG | GGCCCAAGTC | CTTCTGATCG | AGGCCAGCC  |
| AF173612                 | -----      | -----      | -----      | -----      | -----      | -----      | -----      | -----      | -----      | -----      | -----      |
| Gallus_gallus_KT445934.2 | CAGCGCCGAA | TCCCCGCCCC | GCGGTGGGGC | GCGGGAGGTG | TGGCGTACGG | AAGCCCCCAT | CCCCGGCGCC | GCTCTCGGGG | GGCCCAAGTC | CTTCTGATCG | AGGCCAGCC  |
|                          | 7777777777 | 7777777777 | 7777777777 | 7777777777 | 7777777777 | 7777777777 | 7777777777 | 7777777777 | 7777777777 | 7777777777 | 7777777777 |
|                          | 3333333333 | 3333333333 | 3333333334 | 4444444444 | 4444444444 | 4444444444 | 4444444444 | 4444444444 | 4444444444 | 4444444444 | 4444444444 |
|                          | 7777777778 | 8888888889 | 9999999990 | 0000000001 | 1111111112 | 2222222223 | 3333333334 | 4444444445 | 5555555556 | 6666666667 | 7777777778 |
|                          | 1234567890 | 1234567890 | 1234567890 | 1234567890 | 1234567890 | 1234567890 | 1234567890 | 1234567890 | 1234567890 | 1234567890 | 1234567890 |
| AADN03001677             | -----      | -----      | -----      | -----      | -----      | -----      | -----      | -----      | -----      | -----      | -----      |
| AADN03001778             | -----      | -----      | -----      | -----      | -----      | -----      | -----      | -----      | -----      | -----      | -----      |
| AADN03001785             | -----      | -----      | -----      | -----      | -----      | -----      | -----      | -----      | -----      | -----      | -----      |
| AADN03001786             | -----      | -----      | -----      | -----      | -----      | -----      | -----      | -----      | -----      | -----      | -----      |
| AADN03001788             | -----      | -----      | -----      | -----      | -----      | -----      | -----      | -----      | -----      | -----      | -----      |
| AADN03014081             | -----      | -----      | -----      | -----      | -----      | -----      | -----      | -----      | -----      | -----      | -----      |
| AADN03015064             | -----      | -----      | -----      | -----      | -----      | -----      | -----      | -----      | -----      | -----      | -----      |
| AADN03026634             | -----      | -----      | -----      | -----      | -----      | -----      | -----      | -----      | -----      | -----      | -----      |
| NW_003775878             | -----      | -----      | -----      | -----      | -----      | -----      | -----      | -----      | -----      | -----      | -----      |
| DQ018752                 | -----      | -----      | -----      | -----      | -----      | -----      | -----      | -----      | -----      | -----      | -----      |
| DQ018757                 | -----      | -----      | -----      | -----      | -----      | -----      | -----      | -----      | -----      | -----      | -----      |
| DQ112354                 | -----      | -----      | -----      | -----      | -----      | -----      | -----      | -----      | -----      | -----      | -----      |
| FM165414                 | -----      | -----      | -----      | -----      | -----      | -----      | -----      | -----      | -----      | -----      | -----      |
| FM165415                 | -----      | -----      | -----      | -----      | -----      | -----      | -----      | -----      | -----      | -----      | -----      |
| AADN03000430             | -----      | -----      | -----      | -----      | -----      | -----      | -----      | -----      | -----      | -----      | -----      |
| AADN03001784             | CGCGGACGGT | GTGAGGCCGG | TAGCGGCCCC | CCGGCGCGCC | GGGCCCGGGG | CTTCTCGGAG | TCGGGTTGCT | TGGGAATGCA | GCCCAAAGCG | GGTGGTAAAC | TCCATCTAAG |
| AADN03001783             | -----      | -----      | -----      | -----      | -----      | -----      | -----      | -----      | -----      | -----      | -----      |
| DQ018754                 | -----      | -----      | -----      | -----      | -----      | -----      | -----      | -----      | -----      | -----      | -----      |
| AADN03001782             | -----      | -----      | -----      | -----      | -----      | -----      | -----      | -----      | -----      | -----      | -----      |
| JN639848                 | -----      | -----      | -----      | -----      | -----      | -----      | -----      | -----      | -----      | -----      | -----      |
| AADN03001670             | -----      | -----      | -----      | -----      | -----      | -----      | -----      | -----      | -----      | -----      | -----      |
| HQ873432                 | -----      | -----      | -----      | -----      | -----      | -----      | -----      | -----      | -----      | -----      | -----      |
| AADN03001774             | -----      | -----      | -----      | -----      | -----      | -----      | -----      | -----      | -----      | -----      | -----      |
| AADN03001775             | -----      | -----      | -----      | -----      | -----      | -----      | -----      | -----      | -----      | -----      | -----      |
| EF552813                 | -----      | -----      | -----      | -----      | -----      | -----      | -----      | -----      | -----      | -----      | -----      |
| AADN03022685             | -----      | -----      | -----      | -----      | -----      | -----      | -----      | -----      | -----      | -----      | -----      |
| AADN03019346             | -----      | -----      | -----      | -----      | -----      | -----      | -----      | -----      | -----      | -----      | -----      |
| AADN03001776             | -----      | -----      | -----      | -----      | -----      | -----      | -----      | -----      | -----      | -----      | -----      |
| DQ018756                 | CGCGGACGGT | GTGAGGCCGG | TAGCGGCCCC | CCGGCGCGCC | GGGCCCGGGG | CTTCTCGGAG | TCGGGTTGCT | TGGGAATGCA | GCCCAAAGCG | GGTGGTAAAC | TCCATCTAAG |
| AF173612                 | -----      | -----      | -----      | -----      | -----      | -----      | -----      | -----      | -----      | -----      | -----      |
| Gallus_gallus_KT445934.2 | CGCGGACGGT | GTGAGGCCGG | TAGCGGCCCC | CCGGCGCGCC | GGGCCCGGGG | CTTCTCGGAG | TCGGGTTGCT | TGGGAATGCA | GCCCAAAGCG | GGTGGTAAAC | TCCATCTAAG |



|                          |            |            |            |            |            |            |            |            |            |            |            |
|--------------------------|------------|------------|------------|------------|------------|------------|------------|------------|------------|------------|------------|
| AADN03001784             | GGGGTCCGCG | CAGTCGGCCC | GGAGGATTCA | ACCCGGCGGG | CCAAGGTCGG | CCGGCGCGGG | CGCCGTCGGA | TCCCCGCCTC | CGCTCCCTC  | CCGTCCCTCC | CCTTCGCCGG |
| AADN03001783             | -----      | -----      | -----      | -----      | -----      | -----      | -----      | -----      | -----      | -----      | -----      |
| DQ018754                 | -----      | -----      | -----      | -----      | -----      | -----      | -----      | -----      | -----      | -----      | -----      |
| AADN03001782             | -----      | -----      | -----      | -----      | -----      | -----      | -----      | -----      | -----      | -----      | -----      |
| JN639848                 | -----      | -----      | -----      | -----      | -----      | -----      | -----      | -----      | -----      | -----      | -----      |
| AADN03001670             | -----      | -----      | -----      | -----      | -----      | -----      | -----      | -----      | -----      | -----      | -----      |
| HQ873432                 | -----      | -----      | -----      | -----      | -----      | -----      | -----      | -----      | -----      | -----      | -----      |
| AADN03001774             | -----      | -----      | -----      | -----      | -----      | -----      | -----      | -----      | -----      | -----      | -----      |
| AADN03001775             | -----      | -----      | -----      | -----      | -----      | -----      | -----      | -----      | -----      | -----      | -----      |
| EF552813                 | -----      | -----      | -----      | -----      | -----      | -----      | -----      | -----      | -----      | -----      | -----      |
| AADN03022685             | -----      | -----      | -----      | -----      | -----      | -----      | -----      | -----      | -----      | -----      | -----      |
| AADN03019346             | -----      | -----      | -----      | -----      | -----      | -----      | -----      | -----      | -----      | -----      | -----      |
| AADN03001776             | -----      | -----      | -----      | -----      | -----      | -----      | -----      | -----      | -----      | -----      | -----      |
| DQ018756                 | GGGGTCCGCG | CGGTCGGCCC | GGAGGATTCA | ACCCGGCGGG | CCAAGGTCGG | CCGGCGCGGG | CGCCGTCGGA | TCCCCGCCTC | CGCTCCCTC  | CCGTCCCTCC | CCTTCGCCGG |
| AF173612                 | -----      | -----      | -----      | -----      | -----      | -----      | -----      | -----      | -----      | -----      | -----      |
| Gallus_gallus_KT445934.2 | GGGGTCCGCG | CAGTCGGCCC | GGAGGATTCA | ACCCGGCGGG | CCAAGGTCGG | CCGGCGCGGG | CGCCGTCGGA | TCCCCGCCTC | CGCTCCCTC  | CCGTCCCTCC | CCTTCGCCGG |
|                          | 7777777777 | 7777777777 | 7777777777 | 7777777777 | 7777777777 | 7777777777 | 7777777777 | 7777777777 | 7777777777 | 7777777777 | 7777777777 |
|                          | 7777777777 | 7777777777 | 7777777777 | 7777777777 | 7777777777 | 7777777777 | 7777777777 | 7777777777 | 7777777777 | 7777777777 | 8888888888 |
|                          | 0000000001 | 1111111112 | 2222222223 | 3333333334 | 4444444445 | 5555555556 | 6666666667 | 7777777778 | 8888888889 | 9999999990 | 0000000001 |
|                          | 1234567890 | 1234567890 | 1234567890 | 1234567890 | 1234567890 | 1234567890 | 1234567890 | 1234567890 | 1234567890 | 1234567890 | 1234567890 |
| AADN03001677             | -----      | -----      | -----      | -----      | -----      | -----      | -----      | -----      | -----      | -----      | -----      |
| AADN03001778             | -----      | -----      | -----      | -----      | -----      | -----      | -----      | -----      | -----      | -----      | -----      |
| AADN03001785             | -----      | -----      | -----      | -----      | -----      | -----      | -----      | -----      | -----      | -----      | -----      |
| AADN03001786             | -----      | -----      | -----      | -----      | -----      | -----      | -----      | -----      | -----      | -----      | -----      |
| AADN03001788             | -----      | -----      | -----      | -----      | -----      | -----      | -----      | -----      | -----      | -----      | -----      |
| AADN03014081             | -----      | -----      | -----      | -----      | -----      | -----      | -----      | -----      | -----      | -----      | -----      |
| AADN03015064             | -----      | -----      | -----      | -----      | -----      | -----      | -----      | -----      | -----      | -----      | -----      |
| AADN03026634             | -----      | -----      | -----      | -----      | -----      | -----      | -----      | -----      | -----      | -----      | -----      |
| NW_003775878             | -----      | -----      | -----      | -----      | -----      | -----      | -----      | -----      | -----      | -----      | -----      |
| DQ018752                 | -----      | -----      | -----      | -----      | -----      | -----      | -----      | -----      | -----      | -----      | -----      |
| DQ018757                 | -----      | -----      | -----      | -----      | -----      | -----      | -----      | -----      | -----      | -----      | -----      |
| DQ112354                 | -----      | -----      | -----      | -----      | -----      | -----      | -----      | -----      | -----      | -----      | -----      |
| FM165414                 | -----      | -----      | -----      | -----      | -----      | -----      | -----      | -----      | -----      | -----      | -----      |
| FM165415                 | -----      | -----      | -----      | -----      | -----      | -----      | -----      | -----      | -----      | -----      | -----      |
| AADN03000430             | -----      | -----      | -----      | -----      | -----      | -----      | -----      | -----      | -----      | -----      | -----      |
| AADN03001784             | GGCGGGGCGG | GCCCAGGGGG | GGCGGGGCGG | CCGGGGACCG | CCGCCCGGCC | GGCGTCCGGC | CCCCGTCGGG | CGCATTTCCT | CCGCGGCGGT | GCGCCGCGAC | CGGCTCCGGG |
| AADN03001783             | -----      | -----      | -----      | -----      | -----      | -----      | -----      | -----      | -----      | -----      | -----      |
| DQ018754                 | -----      | -----      | -----      | -----      | -----      | -----      | -----      | -----      | -----      | -----      | -----      |
| AADN03001782             | -----      | -----      | -----      | -----      | -----      | -----      | -----      | -----      | -----      | -----      | -----      |
| JN639848                 | -----      | -----      | -----      | -----      | -----      | -----      | -----      | -----      | -----      | -----      | -----      |
| AADN03001670             | -----      | -----      | -----      | -----      | -----      | -----      | -----      | -----      | -----      | -----      | -----      |
| HQ873432                 | -----      | -----      | -----      | -----      | -----      | -----      | -----      | -----      | -----      | -----      | -----      |
| AADN03001774             | -----      | -----      | -----      | -----      | -----      | -----      | -----      | -----      | -----      | -----      | -----      |
| AADN03001775             | -----      | -----      | -----      | -----      | -----      | -----      | -----      | -----      | -----      | -----      | -----      |
| EF552813                 | -----      | -----      | -----      | -----      | -----      | -----      | -----      | -----      | -----      | -----      | -----      |
| AADN03022685             | -----      | -----      | -----      | -----      | -----      | -----      | -----      | -----      | -----      | -----      | -----      |
| AADN03019346             | -----      | -----      | -----      | -----      | -----      | -----      | -----      | -----      | -----      | -----      | -----      |
| AADN03001776             | -----      | -----      | -----      | -----      | -----      | -----      | -----      | -----      | -----      | -----      | -----      |
| DQ018756                 | GGCGGGGCGG | GCCCAGGGGG | GGCGGGGCGG | CCGGGGACCG | CCGCCCGGCC | GGCGTCCGGC | CCCCGTCGGG | CGCATTTCCT | CCGCGGCGGT | GCGCCGCGAC | CGGCTCCGGG |
| AF173612                 | -----      | -----      | -----      | -----      | -----      | -----      | -----      | -----      | -----      | -----      | -----      |
| Gallus_gallus_KT445934.2 | GGCGGGGCGG | GCCCAGGGGG | GGCGGGGCGG | CCGGGGACCG | CCGCCCGGCC | GGCGTCCGGC | CCCCGTCGGG | CGCATTTCCT | CCGCGGCGGT | GCGCCGCGAC | CGGCTCCGGG |





|                          |            |            |            |            |            |            |            |            |            |            |            |
|--------------------------|------------|------------|------------|------------|------------|------------|------------|------------|------------|------------|------------|
| AADN03001784             | GGACCGCCGC | CGCGCCCTCC | CCCGGAGGGG | GCGGCCCCCC | GGAGGGCCCC | CCGCGGCCGG | ACCGGCGTCG | GGCCGGCCGC | GCCGCGCGCG | CGTCCGCGCC | GCCGCCGTAC |
| AADN03001783             | -----      | -----      | -----      | -----      | -----      | -----      | -----      | -----      | -----      | -----      | -----      |
| DQ018754                 | -----      | -----      | -----      | -----      | -----      | -----      | -----      | -----      | -----      | -----      | -----      |
| AADN03001782             | -----      | -----      | -----      | -----      | -----      | -----      | -----      | -----      | -----      | -----      | -----      |
| JN639848                 | -----      | -----      | -----      | -----      | -----      | -----      | -----      | -----      | -----      | -----      | -----      |
| AADN03001670             | -----      | -----      | -----      | -----      | -----      | -----      | -----      | -----      | -----      | -----      | -----      |
| HQ873432                 | -----      | -----      | -----      | -----      | -----      | -----      | -----      | -----      | -----      | -----      | -----      |
| AADN03001774             | -----      | -----      | -----      | -----      | -----      | -----      | -----      | -----      | -----      | -----      | -----      |
| AADN03001775             | -----      | -----      | -----      | -----      | -----      | -----      | -----      | -----      | -----      | -----      | -----      |
| EF552813                 | -----      | -----      | -----      | -----      | -----      | -----      | -----      | -----      | -----      | -----      | -----      |
| AADN03022685             | -----      | -----      | -----      | -----      | -----      | -----      | -----      | -----      | -----      | -----      | -----      |
| AADN03019346             | -----      | -----      | -----      | -----      | -----      | -----      | -----      | -----      | -----      | -----      | -----      |
| AADN03001776             | -----      | -----      | -----      | -----      | -----      | -----      | -----      | -----      | -----      | -----      | -----      |
| DQ018756                 | GGACCGCCGC | CGCGCCCTCC | CCCGGAGGGG | GCGGCCCCCC | GGAGGGCCCC | CCGCGGCCGG | ACCGGCGTCG | GGCCGGCCGC | GCCGCGCGCG | CGTCCGCGCC | GCCGCCGTAC |
| AF173612                 | -----      | -----      | -----      | -----      | -----      | -----      | -----      | -----      | -----      | -----      | -----      |
| Gallus_gallus_KT445934.2 | GGACCGCCGC | CGCGCCCTCC | CCCGGAGGGG | GCGGCCCCCC | GGAGGGCCCC | CCGCGGCCGG | ACCGGCGTCG | GGCCGGCCGC | GCCGCGCGCG | CGTCCGCGCC | GCCGCCGTAC |
|                          | 8888888888 | 8888888888 | 8888888888 | 8888888888 | 8888888888 | 8888888888 | 8888888888 | 8888888888 | 8888888888 | 8888888888 | 8888888888 |
|                          | 0000000000 | 0000000000 | 0000000000 | 0000000000 | 0000000000 | 0000000000 | 0000000001 | 1111111111 | 1111111111 | 1111111111 | 1111111111 |
|                          | 3333333334 | 4444444445 | 5555555556 | 6666666667 | 7777777778 | 8888888889 | 9999999990 | 0000000001 | 1111111112 | 2222222223 | 3333333334 |
|                          | 1234567890 | 1234567890 | 1234567890 | 1234567890 | 1234567890 | 1234567890 | 1234567890 | 1234567890 | 1234567890 | 1234567890 | 1234567890 |
| AADN03001677             | -----      | -----      | -----      | -----      | -----      | -----      | -----      | -----      | -----      | -----      | -----      |
| AADN03001778             | -----      | -----      | -----      | -----      | -----      | -----      | -----      | -----      | -----      | -----      | -----      |
| AADN03001785             | -----      | -----      | -----      | -----      | -----      | -----      | -----      | -----      | -----      | -----      | -----      |
| AADN03001786             | -----      | -----      | -----      | -----      | -----      | -----      | -----      | -----      | -----      | -----      | -----      |
| AADN03001788             | -----      | -----      | -----      | -----      | -----      | -----      | -----      | -----      | -----      | -----      | -----      |
| AADN03014081             | -----      | -----      | -----      | -----      | -----      | -----      | -----      | -----      | -----      | -----      | -----      |
| AADN03015064             | -----      | -----      | -----      | -----      | -----      | -----      | -----      | -----      | -----      | -----      | -----      |
| AADN03026634             | -----      | -----      | -----      | -----      | -----      | -----      | -----      | -----      | -----      | -----      | -----      |
| NW_003775878             | -----      | -----      | -----      | -----      | -----      | -----      | -----      | -----      | -----      | -----      | -----      |
| DQ018752                 | -----      | -----      | -----      | -----      | -----      | -----      | -----      | -----      | -----      | -----      | -----      |
| DQ018757                 | -----      | -----      | -----      | -----      | -----      | -----      | -----      | -----      | -----      | -----      | -----      |
| DQ112354                 | -----      | -----      | -----      | -----      | -----      | -----      | -----      | -----      | -----      | -----      | -----      |
| FM165414                 | -----      | -----      | -----      | -----      | -----      | -----      | -----      | -----      | -----      | -----      | -----      |
| FM165415                 | -----      | -----      | -----      | -----      | -----      | -----      | -----      | -----      | -----      | -----      | -----      |
| AADN03000430             | -----      | -----      | -----      | -----      | -----      | -----      | -----      | -----      | -----      | -----      | -----      |
| AADN03001784             | GCCGCCGCTC | GCTCTCTCTC | CGTTCCCCGC | CCCGGGTCCG | TCCCGGGGCG | CGGGGGCGGG | GGGG-----  | -----      | -----      | -----      | -----      |
| AADN03001783             | -----      | -----      | -----      | -----      | -----      | -----      | -----      | -----      | -----      | -----      | -----      |
| DQ018754                 | -----      | -----      | -----      | -----      | -----      | -----      | -----      | -----      | -----      | -----      | -----      |
| AADN03001782             | -----      | -----      | -----      | -----      | -----      | -----      | -----      | -----      | -----      | -----      | -----      |
| JN639848                 | -----      | -----      | -----      | -----      | -----      | -----      | -----      | -----      | -----      | -----      | -----      |
| AADN03001670             | -----      | -----      | -----      | -----      | -----      | -----      | -----      | -----      | -----      | -----      | -----      |
| HQ873432                 | -----      | -----      | -----      | -----      | -----      | -----      | -----      | -----      | -----      | -----      | -----      |
| AADN03001774             | -----      | -----      | -----      | -----      | -----      | -----      | -----      | -----      | -----      | -----      | -----      |
| AADN03001775             | -----      | -----      | -----      | -----      | -----      | -----      | -----      | -----      | -----      | -----      | -----      |
| EF552813                 | -----      | -----      | -----      | -----      | -----      | -----      | -----      | -----      | -----      | -----      | -----      |
| AADN03022685             | -----      | -----      | -----      | -----      | -----      | -----      | -----      | -----      | -----      | -----      | -----      |
| AADN03019346             | -----      | -----      | -----      | -----      | -----      | -----      | -----      | -----      | -----      | -----      | -----      |
| AADN03001776             | -----      | -----      | -----      | -----      | -----      | -----      | -----      | -----      | -----      | -----      | -----      |
| DQ018756                 | GCCGCCGCTC | GCTCTCTCTC | CGTTCCCCGC | CCCGGGTCCG | TCCCGGGGCG | CGGGGGCGGG | GGGGTCCGGC | GGGTGTCCGG | CGCGCGGCTC | GGCGCGGCGC | CGCGCGTGTG |
| AF173612                 | -----      | -----      | -----      | -----      | -----      | -----      | -----      | -----      | -----      | -----      | -----      |
| Gallus_gallus_KT445934.2 | GCCGCCGCTC | GCTCTCTCTC | CGTTCCCCGC | CCCGGGTCCG | TCCCGGGGCG | CGGGGGCGGG | GGGGTCCGGC | GGGTGTCCGG | CGCGCGGCTC | GGCGCGGCGC | CGCGCGTGTG |

|                          |            |            |            |            |            |            |            |            |            |            |            |            |
|--------------------------|------------|------------|------------|------------|------------|------------|------------|------------|------------|------------|------------|------------|
| 8888888888               | 8888888888 | 8888888888 | 8888888888 | 8888888888 | 8888888888 | 8888888888 | 8888888888 | 8888888888 | 8888888888 | 8888888888 | 8888888888 | 8888888888 |
| 1111111111               | 1111111111 | 1111111111 | 1111111111 | 1111111111 | 1111111112 | 2222222222 | 2222222222 | 2222222222 | 2222222222 | 2222222222 | 2222222222 | 2222222222 |
| 4444444445               | 5555555556 | 6666666667 | 7777777778 | 8888888889 | 9999999990 | 0000000001 | 1111111112 | 2222222223 | 3333333334 | 4444444445 |            |            |
| 1234567890               | 1234567890 | 1234567890 | 1234567890 | 1234567890 | 1234567890 | 1234567890 | 1234567890 | 1234567890 | 1234567890 | 1234567890 | 1234567890 | 1234567890 |
| AADN03001677             |            |            |            |            |            |            |            |            |            |            |            |            |
| AADN03001778             |            |            |            |            |            |            |            |            |            |            |            |            |
| AADN03001785             |            |            |            |            |            |            |            |            |            |            |            |            |
| AADN03001786             |            |            |            |            |            |            |            |            |            |            |            |            |
| AADN03001788             |            |            |            |            |            |            |            |            |            |            |            |            |
| AADN03014081             |            |            |            |            |            |            |            |            |            |            |            |            |
| AADN03015064             |            |            |            |            |            |            |            |            |            |            |            |            |
| AADN03026634             |            |            |            |            |            |            |            |            |            |            |            |            |
| NW_003775878             |            |            |            |            |            |            |            |            |            |            |            |            |
| DQ018752                 |            |            |            |            |            |            |            |            |            |            |            |            |
| DQ018757                 |            |            |            |            |            |            |            |            |            |            |            |            |
| DQ112354                 |            |            |            |            |            |            |            |            |            |            |            |            |
| FM165414                 |            |            |            |            |            |            |            |            |            |            |            |            |
| FM165415                 |            |            |            |            |            |            |            |            |            |            |            |            |
| AADN03000430             |            |            |            |            |            |            |            |            |            |            |            |            |
| AADN03001784             |            |            |            |            |            |            |            |            |            |            |            |            |
| AADN03001783             |            |            |            |            |            |            |            |            |            |            |            |            |
| DQ018754                 |            |            |            |            |            |            |            |            |            |            |            |            |
| AADN03001782             |            |            |            |            |            |            |            |            |            |            |            |            |
| JN639848                 |            |            |            |            |            |            |            |            |            |            |            |            |
| AADN03001670             |            |            |            |            |            |            |            |            |            |            |            |            |
| HQ873432                 |            |            |            |            |            |            |            |            |            |            |            |            |
| AADN03001774             |            |            |            |            |            |            |            |            |            |            |            |            |
| AADN03001775             |            |            |            |            |            |            |            |            |            |            |            |            |
| EF552813                 |            |            |            |            |            |            |            |            |            |            |            |            |
| AADN03022685             |            |            |            |            |            |            |            |            |            |            |            |            |
| AADN03019346             |            |            |            |            |            |            |            |            |            |            |            |            |
| AADN03001776             |            |            |            |            |            |            |            |            |            |            |            |            |
| DQ018756                 | GCGCGCGCCT | CCAGCCCGGC | GCGGGCGAGG | CCGCGGGGGG | CGCCGGGGGG | GAACCTTCCC | CCTTCTGTTC | GGGCCGCCTC | CGTTCCCGCG | GGGGCGGCC  | GTTCGGGGGA |            |
| AF173612                 |            |            |            |            |            |            |            |            |            |            |            |            |
| Gallus_gallus_KT445934.2 | GCGCGCGCCT | CCAGCCCGGC | GCGGGCGAGG | CCGCGGGGGG | CGCCGGGGGG | GAACCTTCCC | CCTTCTGTTC | GGGCCGCCTC | CGTTCCCGCG | GGGGCGGCC  | GTTCGGGGGA |            |
| 8888888888               | 8888888888 | 8888888888 | 8888888888 | 8888888888 | 8888888888 | 8888888888 | 8888888888 | 8888888888 | 8888888888 | 8888888888 | 8888888888 | 8888888888 |
| 2222222222               | 2222222222 | 2222222222 | 2222222222 | 2222222222 | 2222222223 | 3333333333 | 3333333333 | 3333333333 | 3333333333 | 3333333333 | 3333333333 | 3333333333 |
| 5555555556               | 6666666667 | 7777777778 | 8888888889 | 9999999990 | 0000000001 | 1111111112 | 2222222223 | 3333333334 | 4444444445 | 5555555556 |            |            |
| 1234567890               | 1234567890 | 1234567890 | 1234567890 | 1234567890 | 1234567890 | 1234567890 | 1234567890 | 1234567890 | 1234567890 | 1234567890 | 1234567890 | 1234567890 |
| AADN03001677             |            |            |            |            |            |            |            |            |            |            |            |            |
| AADN03001778             |            |            |            |            |            |            |            |            |            |            |            |            |
| AADN03001785             |            |            |            |            |            |            |            |            |            |            |            |            |
| AADN03001786             |            |            |            |            |            |            |            |            |            |            |            |            |
| AADN03001788             |            |            |            |            |            |            |            |            |            |            |            |            |
| AADN03014081             |            |            |            |            |            |            |            |            |            |            |            |            |
| AADN03015064             |            |            |            |            |            |            |            |            |            |            |            |            |
| AADN03026634             |            |            |            |            |            |            |            |            |            |            |            |            |
| NW_003775878             |            |            |            |            |            |            |            |            |            |            |            |            |
| DQ018752                 |            |            |            |            |            |            |            |            |            |            |            |            |
| DQ018757                 |            |            |            |            |            |            |            |            |            |            |            |            |
| DQ112354                 |            |            |            |            |            |            |            |            |            |            |            |            |
| FM165414                 |            |            |            |            |            |            |            |            |            |            |            |            |
| FM165415                 |            |            |            |            |            |            |            |            |            |            |            |            |
| AADN03000430             |            |            |            |            |            |            |            |            |            |            |            |            |

|                          |            |            |            |            |            |            |            |            |            |             |            |            |
|--------------------------|------------|------------|------------|------------|------------|------------|------------|------------|------------|-------------|------------|------------|
| AADN03001784             | -----      | -----      | -----      | -----      | -----      | -----      | -----      | -----      | -----      | -----       | -----      | -----      |
| AADN03001783             | -----      | -----      | -----      | -----      | -----      | -----      | -----      | -----      | -----      | -----       | -----      | -----      |
| DQ018754                 | -----      | -----      | -----      | -----      | -----      | -----      | -----      | -----      | -----      | -----       | -----      | -----      |
| AADN03001782             | -----      | -----      | -----      | -----      | -----      | -----      | -----      | -----      | -----      | -----       | -----      | -----      |
| JN639848                 | -----      | -----      | -----      | -----      | -----      | -----      | -----      | -----      | -----      | -----       | -----      | -----      |
| AADN03001670             | -----      | -----      | -----      | -----      | -----      | -----      | -----      | -----      | -----      | -----       | -----      | -----      |
| HQ873432                 | -----      | -----      | -----      | -----      | -----      | -----      | -----      | -----      | -----      | -----       | -----      | -----      |
| AADN03001774             | CGGGCCCGCC | GGCCCCCGGC | GCCGCTGTCC | GACCGGGGCG | GACTGCGCTC | AGTGCGCCCC | GACCGCGCGG | CGCCGCCGGG | CCGGGCTCGG | GCCACGCCAG  | GGCGCCCGGG | -----      |
| AADN03001775             | -----      | -----      | -----      | -----      | -----      | -----      | -----      | -----      | -----      | -----       | -----      | -----      |
| EF552813                 | -----      | -----      | -----      | -----      | -----      | -----      | -----      | -----      | -----      | -----       | -----      | -----      |
| AADN03022685             | -----      | -----      | -----      | -----      | -----      | -----      | -----      | -----      | -----      | -----       | -----      | -----      |
| AADN03019346             | -----      | -----      | -----      | -----      | -----      | -----      | -----      | -----      | -----      | -----       | -----      | -----      |
| AADN03001776             | -----      | -----      | -----      | -----      | -----      | -----      | -----      | -----      | -----      | -----       | -----      | -----      |
| DQ018756                 | CGGGCCCGCC | GGCCCCCGGC | GCCGCTGTCC | GACCGGGGCG | GACTGCGCTC | AGTGCGCCCC | GACCGCGCGG | CGCCGCCGGG | CCGGGCTCGG | GCCACGCCAG  | GGCGCCCGGG | -----      |
| AF173612                 | -----      | -----      | -----      | -----      | -----      | -----      | -----      | -----      | -----      | -----       | -----      | -----      |
| Gallus_gallus_KT445934.2 | CGGGCCCGCC | GGCCCCCGGC | GCCGCTGTCC | GACCGGGGCG | GACTGCGCTC | AGTGCGCCCC | GACCGCGCGG | CGCCGCCGGG | CCGGGCTCGG | GCCACGCCAG  | GGCGCCCGGG | -----      |
| -----                    | 8888888888 | 8888888888 | 8888888888 | 8888888888 | 8888888888 | 8888888888 | 8888888888 | 8888888888 | 8888888888 | 8888888888  | 8888888888 | 8888888888 |
| -----                    | 3333333333 | 3333333333 | 3333333333 | 3333333333 | 4444444444 | 4444444444 | 4444444444 | 4444444444 | 4444444444 | 4444444444  | 4444444444 | 4444444444 |
| -----                    | 6666666667 | 7777777778 | 8888888889 | 9999999990 | 0000000001 | 1111111112 | 2222222223 | 3333333334 | 4444444445 | 5555555556  | 6666666667 | -----      |
| -----                    | 1234567890 | 1234567890 | 1234567890 | 1234567890 | 1234567890 | 1234567890 | 1234567890 | 1234567890 | 1234567890 | 1234567890  | 1234567890 | 1234567890 |
| AADN03001677             | -----      | -----      | -----      | -----      | -----      | -----      | -----      | -----      | -----      | -----       | -----      | -----      |
| AADN03001778             | -----      | -----      | -----      | -----      | -----      | -----      | -----      | -----      | -----      | -----       | -----      | -----      |
| AADN03001785             | -----      | -----      | -----      | -----      | -----      | -----      | -----      | -----      | -----      | -----       | -----      | -----      |
| AADN03001786             | -----      | -----      | -----      | -----      | -----      | -----      | -----      | -----      | -----      | -----       | -----      | -----      |
| AADN03001788             | -----      | -----      | -----      | -----      | -----      | -----      | -----      | -----      | -----      | -----       | -----      | -----      |
| AADN03014081             | -----      | -----      | -----      | -----      | -----      | -----      | -----      | -----      | -----      | -----       | -----      | -----      |
| AADN03015064             | -----      | -----      | -----      | -----      | -----      | -----      | -----      | -----      | -----      | -----       | -----      | -----      |
| AADN03026634             | -----      | -----      | -----      | -----      | -----      | -----      | -----      | -----      | -----      | -----       | -----      | -----      |
| NW_003775878             | -----      | -----      | -----      | -----      | -----      | -----      | -----      | -----      | -----      | -----       | -----      | -----      |
| DQ018752                 | -----      | -----      | -----      | -----      | -----      | -----      | -----      | -----      | -----      | -----       | -----      | -----      |
| DQ018757                 | -----      | -----      | -----      | -----      | -----      | -----      | -----      | -----      | -----      | -----       | -----      | -----      |
| DQ112354                 | -----      | -----      | -----      | -----      | -----      | -----      | -----      | -----      | -----      | -----       | -----      | -----      |
| FM165414                 | -----      | -----      | -----      | -----      | -----      | -----      | -----      | -----      | -----      | -----       | -----      | -----      |
| FM165415                 | -----      | -----      | -----      | -----      | -----      | -----      | -----      | -----      | -----      | -----       | -----      | -----      |
| AADN03000430             | -----      | -----      | -----      | -----      | -----      | -----      | -----      | -----      | -----      | -----       | -----      | -----      |
| AADN03001784             | -----      | -----      | -----      | -----      | -----      | -----      | -----      | -----      | -----      | -----       | -----      | -----      |
| AADN03001783             | -----      | -----      | -----      | -----      | -----      | -----      | -----      | -----      | -----      | -----       | -----      | -----      |
| DQ018754                 | -----      | -----      | -----      | -----      | -----      | -----      | -----      | -----      | -----      | -----       | -----      | -----      |
| AADN03001782             | -----      | -----      | -----      | -----      | -----      | -----      | -----      | -----      | -----      | -----       | -----      | -----      |
| JN639848                 | -----      | -----      | -----      | -----      | -----      | -----      | -----      | -----      | -----      | -----       | -----      | -----      |
| AADN03001670             | -----      | -----      | -----      | -----      | -----      | -----      | -----      | -----      | -----      | -----       | -----      | -----      |
| HQ873432                 | -----      | -----      | -----      | -----      | -----      | -----      | -----      | -----      | -----      | -----       | -----      | -----      |
| AADN03001774             | GTCCGCGGCG | ACGTCGGCTA | CCCACCCGAC | CCGTCTTGAA | ACACGGACCA | AGGAGTCTAG | CACGCGCGCG | AGTCGGCGGC | TCGCGCGAAA | GCCC GCGGCG | CAATGAAGGT | -----      |
| AADN03001775             | -----      | -----      | -----      | -----      | -----      | -----      | -----      | -----      | -----      | -----       | -----      | -----      |
| EF552813                 | -----      | -----      | -----      | -----      | -----      | -----      | -----      | -----      | -----      | -----       | -----      | -----      |
| AADN03022685             | -----      | -----      | -----      | -----      | -----      | -----      | -----      | -----      | -----      | -----       | -----      | -----      |
| AADN03019346             | -----      | -----      | -----      | -----      | -----      | -----      | -----      | -----      | -----      | -----       | -----      | -----      |
| AADN03001776             | -----      | -----      | -----      | -----      | -----      | -----      | -----      | -----      | -----      | -----       | -----      | -----      |
| DQ018756                 | GTCCGCGGCG | ACGTCGGCTA | CCCACCCGAC | CCGTCTTGAA | ACACGGACCA | AGGAGTCTAG | CACGCGCGCG | AGTCGGCGGC | TCGCGCGAAA | GCCC GCGGCG | CAATGAAGGT | -----      |
| AF173612                 | -----      | -----      | -----      | -----      | -----      | -----      | -----      | -----      | -----      | -----       | -----      | -----      |
| Gallus_gallus_KT445934.2 | GTCCGCGGCG | ACGTCGGCTA | CCCACCCGAC | CCGTCTTGAA | ACACGGACCA | AGGAGTCTAG | CACGCGCGCG | AGTCGGCGGC | TCGCGCGAAA | GCCC GCGGCG | CAATGAAGGT | -----      |



|                          |            |            |            |            |            |            |            |            |            |            |            |            |
|--------------------------|------------|------------|------------|------------|------------|------------|------------|------------|------------|------------|------------|------------|
| AADN03001784             | -----      | -----      | -----      | -----      | -----      | -----      | -----      | -----      | -----      | -----      | -----      | -----      |
| AADN03001783             | -----      | -----      | -----      | -----      | -----      | -----      | -----      | -----      | -----      | -----      | -----      | -----      |
| DQ018754                 | -----      | -----      | -----      | -----      | -----      | -----      | -----      | -----      | -----      | -----      | -----      | -----      |
| AADN03001782             | -----      | -----      | -----      | -----      | -----      | -----      | -----      | -----      | -----      | -----      | -----      | -----      |
| JN639848                 | -----      | -----      | -----      | -----      | -----      | -----      | -----      | -----      | -----      | -----      | -----      | -----      |
| AADN03001670             | -----      | -----      | -----      | -----      | -----      | -----      | -----      | -----      | -----      | -----      | -----      | -----      |
| HQ873432                 | -----      | -----      | -----      | -----      | -----      | -----      | -----      | -----      | -----      | -----      | -----      | -----      |
| AADN03001774             | GCGCGTGCTA | GGACCCGAAA | GATGGTGAAC | TATGCCTGGG | CAGGGCGAAG | CCAGAGGAAA | CTCTGGTGGG | GGTCCGTAGC | GGTCCTGACG | TGCAAATCGG | TCGTCCGACC | -----      |
| AADN03001775             | -----      | -----      | -----      | -----      | -----      | -----      | -----      | -----      | -----      | -----      | -----      | -----      |
| EF552813                 | -----      | -----      | -----      | -----      | -----      | -----      | -----      | -----      | -----      | -----      | -----      | -----      |
| AADN03022685             | -----      | -----      | -----      | -----      | -----      | -----      | -----      | -----      | -----      | -----      | -----      | -----      |
| AADN03019346             | -----      | -----      | -----      | -----      | -----      | -----      | -----      | -----      | -----      | -----      | -----      | -----      |
| AADN03001776             | -----      | -----      | -----      | -----      | -----      | -----      | -----      | -----      | -----      | -----      | -----      | -----      |
| DQ018756                 | GCGCGTGCTA | GGACCCGAAA | GATGGTGAAC | TATGCCTGGG | CAGGGCGAAG | CCAGAGGAAA | CTCTGGTGGG | GGTCCGTAGC | GGTCCTGACG | TGCAAATCGG | TCGTCCGACC | -----      |
| AF173612                 | -----      | -----      | -----      | -----      | -----      | -----      | -----      | -----      | -----      | -----      | -----      | -----      |
| Gallus_gallus_KT445934.2 | GCGCGTGCTA | GGACCCGAAA | GATGGTGAAC | TATGCCTGGG | CAGGGCGAAG | CCAGAGGAAA | CTCTGGTGGG | GGTCCGTAGC | GGTCCTGACG | TGCAAATCGG | TCGTCCGACC | -----      |
| -----                    | -----      | -----      | -----      | -----      | -----      | -----      | -----      | -----      | -----      | -----      | -----      | -----      |
| -----                    | 8888888888 | 8888888888 | 8888888888 | 8888888888 | 8888888888 | 8888888888 | 8888888888 | 8888888888 | 8888888888 | 8888888888 | 8888888888 | 8888888888 |
| -----                    | 6666666667 | 7777777777 | 7777777777 | 7777777777 | 7777777777 | 7777777777 | 7777777777 | 7777777777 | 7777777777 | 7777777777 | 7777777777 | 7777777778 |
| -----                    | 9999999990 | 0000000001 | 1111111112 | 2222222223 | 3333333334 | 4444444445 | 5555555556 | 6666666667 | 7777777778 | 8888888889 | 9999999990 | -----      |
| -----                    | 1234567890 | 1234567890 | 1234567890 | 1234567890 | 1234567890 | 1234567890 | 1234567890 | 1234567890 | 1234567890 | 1234567890 | 1234567890 | 1234567890 |
| AADN03001677             | -----      | -----      | -----      | -----      | -----      | -----      | -----      | -----      | -----      | -----      | -----      | -----      |
| AADN03001778             | -----      | -----      | -----      | -----      | -----      | -----      | -----      | -----      | -----      | -----      | -----      | -----      |
| AADN03001785             | -----      | -----      | -----      | -----      | -----      | -----      | -----      | -----      | -----      | -----      | -----      | -----      |
| AADN03001786             | -----      | -----      | -----      | -----      | -----      | -----      | -----      | -----      | -----      | -----      | -----      | -----      |
| AADN03001788             | -----      | -----      | -----      | -----      | -----      | -----      | -----      | -----      | -----      | -----      | -----      | -----      |
| AADN03014081             | -----      | -----      | -----      | -----      | -----      | -----      | -----      | -----      | -----      | -----      | -----      | -----      |
| AADN03015064             | -----      | -----      | -----      | -----      | -----      | -----      | -----      | -----      | -----      | -----      | -----      | -----      |
| AADN03026634             | -----      | -----      | -----      | -----      | -----      | -----      | -----      | -----      | -----      | -----      | -----      | -----      |
| NW_003775878             | -----      | -----      | -----      | -----      | -----      | -----      | -----      | -----      | -----      | -----      | -----      | -----      |
| DQ018752                 | -----      | -----      | -----      | -----      | -----      | -----      | -----      | -----      | -----      | -----      | -----      | -----      |
| DQ018757                 | CGGGTATAGG | GGCGAAAGAC | TAATCGAACC | ATCTAGTAGC | TGGTTCCTC  | CGAAGTTTCC | CTCAGGATAG | CTGGCGCTCG | GGGCGGCGGT | GCAGTTTTAC | CCGGTAAAGC | -----      |
| DQ112354                 | -----      | -----      | -----      | -----      | -----      | -----      | -----      | -----      | -----      | -----      | -----      | -----      |
| FM165414                 | -----      | -----      | -----      | -----      | -----      | -----      | -----      | -----      | -----      | -----      | -----      | -----      |
| FM165415                 | CGGGTATAGG | GGCGAAAGAC | TAATCGAACC | ATCTAGTAGC | TGGTTCCTC  | CGAAGTTTCC | CTCAGGATAG | CTGGCGCTCG | GGGCGGCGGT | GCAGTTTTAC | CCGGTAAAGC | -----      |
| AADN03000430             | -----      | -----      | -----      | -----      | -----      | -----      | -----      | -----      | -----      | -----      | -----      | -----      |
| AADN03001784             | -----      | -----      | -----      | -----      | -----      | -----      | -----      | -----      | -----      | -----      | -----      | -----      |
| AADN03001783             | -----      | -----      | -----      | -----      | -----      | -----      | -----      | -----      | -----      | -----      | -----      | -----      |
| DQ018754                 | -----      | -----      | -----      | -----      | -----      | -----      | -----      | -----      | -----      | -----      | -----      | -----      |
| AADN03001782             | -----      | -----      | -----      | -----      | -----      | -----      | -----      | -----      | -----      | -----      | -----      | -----      |
| JN639848                 | -----      | -----      | -----      | -----      | -----      | -----      | -----      | -----      | -----      | -----      | -----      | -----      |
| AADN03001670             | -----      | -----      | -----      | -----      | -----      | -----      | -----      | -----      | -----      | -----      | -----      | -----      |
| HQ873432                 | -----      | -----      | -----      | -----      | -----      | -----      | -----      | -----      | -----      | -----      | -----      | -----      |
| AADN03001774             | CGGGTATAGG | GGCGAAAGAC | TAATCGAACC | ATCTAGTAGC | TGGTTCCTC  | CGAAGTTTCC | CTCAGGATAG | CTGGCGCTCG | GGGCGGCGGT | GCAGTTTTAC | CCGGTAAAGC | -----      |
| AADN03001775             | -----      | -----      | -----      | -----      | -----      | -----      | -----      | -----      | -----      | -----      | -----      | -----      |
| EF552813                 | -----      | -----      | -----      | -----      | -----      | -----      | -----      | -----      | -----      | -----      | -----      | -----      |
| AADN03022685             | -----      | -----      | -----      | -----      | -----      | -----      | -----      | -----      | -----      | -----      | -----      | -----      |
| AADN03019346             | -----      | -----      | -----      | -----      | -----      | -----      | -----      | -----      | -----      | -----      | -----      | -----      |
| AADN03001776             | -----      | -----      | -----      | -----      | -----      | -----      | -----      | -----      | -----      | -----      | -----      | -----      |
| DQ018756                 | CGGGTATAGG | GGCGAAAGAC | TAATCGAACC | ATCTAGTAGC | TGGTTCCTC  | CGAAGTTTCC | CTCAGGATAG | CTGGCGCTCG | GGGCGGCGGT | GCAGTTTTAC | CCGGTAAAGC | -----      |
| AF173612                 | -----      | -----      | -----      | -----      | -----      | -----      | -----      | -----      | -----      | -----      | -----      | -----      |
| Gallus_gallus_KT445934.2 | CGGGTATAGG | GGCGAAAGAC | TAATCGAACC | ATCTAGTAGC | TGGTTCCTC  | CGAAGTTTCC | CTCAGGATAG | CTGGCGCTCG | GGGCGGCGGT | GCAGTTTTAC | CCGGTAAAGC | -----      |



|                          |            |            |            |            |            |            |            |            |            |            |            |
|--------------------------|------------|------------|------------|------------|------------|------------|------------|------------|------------|------------|------------|
| AADN03001784             | -----      | -----      | -----      | -----      | -----      | -----      | -----      | -----      | -----      | -----      | -----      |
| AADN03001783             | -----      | -----      | -----      | -----      | -----      | -----      | -----      | -----      | -----      | -----      | -----      |
| DQ018754                 | -----      | -----      | -----      | -----      | -----      | -----      | -----      | -----      | -----      | -----      | -----      |
| AADN03001782             | -----      | -----      | -----      | -----      | -----      | -----      | -----      | -----      | -----      | -----      | -----      |
| JN639848                 | -----      | -----      | -----      | -----      | -----      | -----      | -----      | -----      | -----      | -----      | -----      |
| AADN03001670             | -----      | -----      | -----      | -----      | -----      | -----      | -----      | -----      | -----      | -----      | -----      |
| HQ873432                 | -----      | -----      | -----      | -----      | -----      | -----      | -----      | -----      | -----      | -----      | -----      |
| AADN03001774             | AGTGGGCCAC | TTTTGGTAAG | CAGAACTGGC | GCTGCGGGAT | GAACCGAACG | CCGGGTAAAG | GCGCCCGATG | CCGACGCTCA | TCAGAGCCCA | GAAAAGGTGT | TGGTTGATCT |
| AADN03001775             | -----      | -----      | -----      | -----      | -----      | -----      | -----      | -----      | -----      | -----      | -----      |
| EF552813                 | -----      | -----      | -----      | -----      | -----      | -----      | -----      | -----      | -----      | -----      | -----      |
| AADN03022685             | -----      | -----      | -----      | -----      | -----      | -----      | -----      | -----      | -----      | -----      | -----      |
| AADN03019346             | -----      | -----      | -----      | -----      | -----      | -----      | -----      | -----      | -----      | -----      | -----      |
| AADN03001776             | -----      | -----      | -----      | -----      | -----      | -----      | -----      | -----      | -----      | -----      | -----      |
| DQ018756                 | -----      | -----      | -----      | -----      | -----      | -----      | -----      | -----      | -----      | -----      | -----      |
| AF173612                 | -----      | -----      | -----      | -----      | -----      | -----      | -----      | -----      | -----      | -----      | -----      |
| Gallus_gallus_KT445934.2 | AGTGGGCCAC | TTTTGGTAAG | CAGAACTGGC | GCTGCGGGAT | GAACCGAACG | CCGGGTAAAG | GCGCCCGATG | CCGACGCTCA | TCAGAGCCCA | GAAAAGGTGT | TGGTTGATCT |
|                          | 9999999999 | 9999999999 | 9999999999 | 9999999999 | 9999999999 | 9999999999 | 9999999999 | 9999999999 | 9999999999 | 9999999999 | 9999999999 |
|                          | 0000000000 | 0000000000 | 0000000000 | 0000000000 | 0000000000 | 0000000000 | 0000000000 | 0000000001 | 1111111111 | 1111111111 | 1111111111 |
|                          | 2222222223 | 3333333334 | 4444444445 | 5555555556 | 6666666667 | 7777777778 | 8888888889 | 9999999990 | 0000000001 | 1111111112 | 2222222223 |
|                          | 1234567890 | 1234567890 | 1234567890 | 1234567890 | 1234567890 | 1234567890 | 1234567890 | 1234567890 | 1234567890 | 1234567890 | 1234567890 |
| AADN03001677             | -----      | -----      | -----      | -----      | -----      | -----      | -----      | -----      | -----      | -----      | -----      |
| AADN03001778             | -----      | -----      | -----      | -----      | -----      | -----      | -----      | -----      | -----      | -----      | -----      |
| AADN03001785             | -----      | -----      | -----      | -----      | -----      | -----      | -----      | -----      | -----      | -----      | -----      |
| AADN03001786             | -----      | -----      | -----      | -----      | -----      | -----      | -----      | -----      | -----      | -----      | -----      |
| AADN03001788             | -----      | -----      | -----      | -----      | -----      | -----      | -----      | -----      | -----      | -----      | -----      |
| AADN03014081             | -----      | -----      | -----      | -----      | -----      | -----      | -----      | -----      | -----      | -----      | -----      |
| AADN03015064             | -----      | -----      | -----      | -----      | -----      | -----      | -----      | -----      | -----      | -----      | -----      |
| AADN03026634             | -----      | -----      | -----      | -----      | -----      | -----      | -----      | -----      | -----      | -----      | -----      |
| NW_003775878             | -----      | -----      | -----      | -----      | -----      | -----      | -----      | -----      | -----      | -----      | -----      |
| DQ018752                 | -----      | -----      | -----      | -----      | -----      | -----      | -----      | -----      | -----      | -----      | -----      |
| DQ018757                 | AGACAGCAGG | ACGGTGGCCA | TGGAAGTCGG | AGCCCGCTAA | GGAGTGTGTA | ACAACCTACC | TGCCGAATCA | ACTAGCCCTG | AAAATGGATG | GCGCTGGAGC | GTCGGGCCCA |
| DQ112354                 | -----      | -----      | -----      | -----      | -----      | -----      | -----      | -----      | -----      | -----      | -----      |
| FM165414                 | -----      | -----      | -----      | -----      | -----      | -----      | -----      | -----      | -----      | -----      | -----      |
| FM165415                 | AGACAGCAGG | ACGGTGGCCA | TGGAAGTCGG | AACCCGCTAA | GGAGTGTGTA | ACAACCTACC | TGCCGAATCA | ACTAGCCCTG | AAAATGGATG | GCGCTGGAGC | GTCAGGCCCA |
| AADN03000430             | -----      | -----      | -----      | -----      | -----      | -----      | -----      | -----      | -----      | -----      | -----      |
| AADN03001784             | -----      | -----      | -----      | -----      | -----      | -----      | -----      | -----      | -----      | -----      | -----      |
| AADN03001783             | -----      | -----      | -----      | -----      | -----      | -----      | -----      | -----      | -----      | -----      | -----      |
| DQ018754                 | -----      | -----      | -----      | -----      | -----      | -----      | -----      | -----      | -----      | -----      | -----      |
| AADN03001782             | -----      | -----      | -----      | -----      | -----      | -----      | -----      | -----      | -----      | -----      | -----      |
| JN639848                 | -----      | -----      | -----      | -----      | -----      | -----      | -----      | -----      | -----      | -----      | -----      |
| AADN03001670             | -----      | -----      | -----      | -----      | -----      | -----      | -----      | -----      | -----      | -----      | -----      |
| HQ873432                 | -----      | -----      | -----      | -----      | -----      | -----      | -----      | -----      | -----      | -----      | -----      |
| AADN03001774             | AGACAGCAGG | ACGGTGGCCA | TGGAAGTCGG | AACCCGCTAA | GGAGTGTGTA | ACAACCTACC | TGCCGAATCA | ACTAGCCCTG | AAAATGGATG | GCGCTGGAGC | GTCGGGCCCA |
| AADN03001775             | -----      | -----      | -----      | -----      | -----      | -----      | -----      | -----      | -----      | -----      | -----      |
| EF552813                 | -----      | -----      | -----      | -----      | -----      | -----      | -----      | -----      | -----      | -----      | -----      |
| AADN03022685             | -----      | -----      | -----      | -----      | -----      | -----      | -----      | -----      | -----      | -----      | -----      |
| AADN03019346             | -----      | -----      | -----      | -----      | -----      | -----      | -----      | -----      | -----      | -----      | -----      |
| AADN03001776             | -----      | -----      | -----      | -----      | -----      | -----      | -----      | -----      | -----      | -----      | -----      |
| DQ018756                 | -----      | -----      | -----      | -----      | -----      | -----      | -----      | -----      | -----      | -----      | -----      |
| AF173612                 | -----      | -----      | -----      | -----      | -----      | -----      | -----      | -----      | -----      | -----      | -----      |
| Gallus_gallus_KT445934.2 | AGACAGCAGG | ACGGTGGCCA | TGGAAGTCGG | AACCCGCTAA | GGAGTGTGTA | ACAACCTACC | TGCCGAATCA | ACTAGCCCTG | AAAATGGATG | GCGCTGGAGC | GTCGGGCCCA |





|                          |            |            |            |            |            |            |            |            |            |            |            |            |
|--------------------------|------------|------------|------------|------------|------------|------------|------------|------------|------------|------------|------------|------------|
| AADN03001784             | -----      | -----      | -----      | -----      | -----      | -----      | -----      | -----      | -----      | -----      | -----      | -----      |
| AADN03001783             | -----      | -----      | -----      | -----      | -----      | -----      | -----      | -----      | -----      | -----      | -----      | -----      |
| DQ018754                 | -----      | -----      | -----      | -----      | -----      | -----      | -----      | -----      | -----      | -----      | -----      | -----      |
| AADN03001782             | -----      | -----      | -----      | -----      | -----      | -----      | -----      | -----      | -----      | -----      | -----      | -----      |
| JN639848                 | -AGGTGCAGA | TCTTGGTGGT | AGTA-CAACT | ATTCAAACGA | GAGCTTTGAA | GGCCGAAGTG | GAGCAGGGTT | CCATGTGAAC | AGCAGTTGAA | CATGGGTCAG | TCGGTCCTAA | -----      |
| AADN03001670             | -----      | -----      | -----      | -----      | -----      | -----      | -----      | -----      | -----      | -----      | -----      | -----      |
| HQ873432                 | -----      | -----      | -----      | -----      | -----      | -----      | -----      | -----      | -----      | -----      | -----      | -----      |
| AADN03001774             | CAGGTGCAGA | TCTTGGTGGT | AGTAGCAACT | ATTCAAACGA | GAGCTTTGAA | GGCCGAAGTG | GAGCAGGGTT | CCATGTGAAC | AGCAGTTGAA | CATGGGTCAG | TCGGTCCTAA | -----      |
| AADN03001775             | -----      | -----      | -----      | ----AAACGA | GAGCTTTGAA | GGCCGAAGTG | GAGCAGGGTT | CCATGTGAAC | AGCAGTTGAA | CATGGGTCAG | TCGGTCCTAA | -----      |
| EF552813                 | -----      | -----      | -----      | -----      | -----      | -----      | -----      | -----      | -----      | -----      | -----      | -----      |
| AADN03022685             | -----      | -----      | -----      | -----      | -----      | -----      | -----      | -----      | -----      | -----      | -----      | -----      |
| AADN03019346             | -----      | -----      | -----      | -----      | -----      | -----      | -----      | -----      | -----      | -----      | -----      | -----      |
| AADN03001776             | -----      | -----      | -----      | -----      | -----      | -----      | -----      | -----      | -----      | -----      | -----      | -----      |
| DQ018756                 | -----      | -----      | -----      | -----      | -----      | -----      | -----      | -----      | -----      | -----      | -----      | -----      |
| AF173612                 | -----      | -----      | -----      | -----      | -----      | -----      | -----      | -----      | -----      | -----      | -----      | -----      |
| Gallus_gallus_KT445934.2 | CAGGTGCAGA | TCTTGGTGGT | AGTAGCAACT | ATTCAAACGA | GAGCTTTGAA | GGCCGAAGTG | GAGCAGGGTT | CCATGTGAAC | AGCAGTTGAA | CATGGGTCAG | TCGGTCCTAA | -----      |
|                          | 9999999999 | 9999999999 | 9999999999 | 9999999999 | 9999999999 | 9999999999 | 9999999999 | 9999999999 | 9999999999 | 9999999999 | 9999999999 | 9999999999 |
|                          | 3333333333 | 3333333333 | 3333333333 | 3333333333 | 3333333334 | 4444444444 | 4444444444 | 4444444444 | 4444444444 | 4444444444 | 4444444444 | 4444444444 |
|                          | 5555555556 | 6666666667 | 7777777778 | 8888888889 | 9999999990 | 0000000001 | 1111111112 | 2222222223 | 3333333334 | 4444444445 | 5555555556 | -----      |
|                          | 1234567890 | 1234567890 | 1234567890 | 1234567890 | 1234567890 | 1234567890 | 1234567890 | 1234567890 | 1234567890 | 1234567890 | 1234567890 | 1234567890 |
| AADN03001677             | -----      | -----      | -----      | -----      | -----      | -----      | -----      | -----      | -----      | -----      | -----      | -----      |
| AADN03001778             | -----      | -----      | -----      | -----      | -----      | -----      | -----      | -----      | -----      | -----      | -----      | -----      |
| AADN03001785             | -----      | -----      | -----      | -----      | -----      | -----      | -----      | -----      | -----      | -----      | -----      | -----      |
| AADN03001786             | -----      | -----      | -----      | -----      | -----      | -----      | -----      | -----      | -----      | -----      | -----      | -----      |
| AADN03001788             | -----      | -----      | -----      | -----      | -----      | -----      | -----      | -----      | -----      | -----      | -----      | -----      |
| AADN03014081             | -----      | -----      | -----      | -----      | -----      | -----      | -----      | -----      | -----      | -----      | -----      | -----      |
| AADN03015064             | -----      | -----      | -----      | -----      | -----      | -----      | -----      | -----      | -----      | -----      | -----      | -----      |
| AADN03026634             | -----      | -----      | -----      | -----      | -----      | -----      | -----      | -----      | -----      | -----      | -----      | -----      |
| NW_003775878             | -----      | -----      | -----      | -----      | -----      | -----      | -----      | -----      | -----      | -----      | -----      | -----      |
| DQ018752                 | -----      | -----      | -----      | -----      | -----      | -----      | -----      | -----      | -----      | -----      | -----      | -----      |
| DQ018757                 | GCGATAGGCG | AGCGCCGTTT | CGAAGG-ACG | GGCGATGGCC | TCCGTTGCC  | TCAGCCGATC | GAAAGGGAGT | CGGGTTCAGA | TCCCCGAATC | CGGAGCGGCG | GAGACGGGCG | -----      |
| DQ112354                 | -----      | -----      | -----      | -----      | -----      | -----      | -----      | -----      | -----      | -----      | -----      | -----      |
| FM165414                 | -----      | -----      | -----      | -----      | -----      | -----      | -----      | -----      | -----      | -----      | -----      | -----      |
| FM165415                 | GCGATAGGCG | AGCGCCGTTT | CGAAGGGACG | GGCGATAGCC | TCCGTTGCC  | TCAGCCGATC | GAAAGGGAGT | CGGGTTCAGA | TCCCCGAATC | CGGGGCGGCG | GAGACGGGCG | -----      |
| AADN03000430             | -----      | -----      | -----      | -----      | -----      | -----      | -----      | -----      | -----      | -----      | -----      | -----      |
| AADN03001784             | -----      | -----      | -----      | -----      | -----      | -----      | -----      | -----      | -----      | -----      | -----      | -----      |
| AADN03001783             | -----      | -----      | -----      | -----      | -----      | -----      | -----      | -----      | -----      | -----      | -----      | -----      |
| DQ018754                 | -----      | -----      | -----      | -----      | -----      | -----      | -----      | -----      | -----      | -----      | -----      | -----      |
| AADN03001782             | -----      | -----      | -----      | -----      | -----      | -----      | -----      | -----      | -----      | -----      | -----      | -----      |
| JN639848                 | GCGATAGGCG | AGCGCCGTTT | CGAAGGGACG | GGCGATGGCC | TCCGTTGCC  | TCAGCCGATC | GAAAGGGAGT | CGGGTTCAGA | TCCCCGAATC | CGGAGCGGCG | GAGACGGGCG | -----      |
| AADN03001670             | -----      | -----      | -----      | -----      | -----      | -----      | -----      | -----      | -----      | -----      | -----      | -----      |
| HQ873432                 | -----      | -----      | -----      | -----      | -----      | -----      | -----      | -----      | -----      | -----      | -----      | -----      |
| AADN03001774             | GCGATAGGCG | AGCGCCGTTT | CGAAGGGACG | GGCGATGGCC | TCCGTTGCC  | TCAGCCGATC | GAAAGGGAGT | CGGGTTCAGA | TCCCCGAATC | CGGAGCGGCG | GAGACGGGCG | -----      |
| AADN03001775             | GCGATAGGCG | AGCGCCGTTT | CGAAGGGACG | GGCGATGGCC | TCCGTTGCC  | TCAGCCGATC | GAAAGGGAGT | CGGGTTCAGA | TCCCCGAATC | CGGAGCGGCG | GAGACGGGCG | -----      |
| EF552813                 | -----      | -----      | -----      | -----      | -----      | -----      | -----      | -----      | -----      | -----      | -----      | -----      |
| AADN03022685             | -----      | -----      | -----      | -----      | -----      | -----      | -----      | -----      | -----      | -----      | -----      | -----      |
| AADN03019346             | -----      | -----      | -----      | -----      | -----      | -----      | -----      | -----      | -----      | -----      | -----      | -----      |
| AADN03001776             | -----      | -----      | -----      | -----      | -----      | -----      | -----      | -----      | -----      | -----      | -----      | -----      |
| DQ018756                 | -----      | -----      | -----      | -----      | -----      | -----      | -----      | -----      | -----      | -----      | -----      | -----      |
| AF173612                 | -----      | -----      | -----      | -----      | -----      | -----      | -----      | -----      | -----      | -----      | -----      | -----      |
| Gallus_gallus_KT445934.2 | GCGATAGGCG | AGCGCCGTTT | CGAAGGGACG | GGCGATGGCC | TCCGTTGCC  | TCAGCCGATC | GAAAGGGAGT | CGGGTTCAGA | TCCCCGAATC | CGGAGCGGCG | GAGACGGGCG | -----      |



|                          |            |            |            |            |            |            |            |            |            |            |            |            |
|--------------------------|------------|------------|------------|------------|------------|------------|------------|------------|------------|------------|------------|------------|
| AADN03001784             | -----      | -----      | -----      | -----      | -----      | -----      | -----      | -----      | -----      | -----      | -----      |            |
| AADN03001783             | -----      | -----      | -----      | -----      | -----      | -----      | -----      | -----      | -----      | -----      | -----      |            |
| DQ018754                 | -----      | -----      | -----      | -----      | -----      | -----      | -----      | -----      | -----      | -----      | -----      |            |
| AADN03001782             | -----      | -----      | -----      | -----      | -----      | -----      | -----      | -----      | -----      | -----      | -----      |            |
| JN639848                 | -----      | -----      | -----      | -----      | -----      | -----      | -----      | -----      | -----      | -----      | -----      |            |
| AADN03001670             | -----      | -----      | -----      | -----      | -----      | -----      | -----      | -----      | -----      | -----      | -----      |            |
| HQ873432                 | -----      | -----      | -----      | -----      | -----      | -----      | -----      | -----      | -----      | -----      | -----      |            |
| AADN03001774             | CCCAGAGAG  | GGGCCCGCGC | CTTGGAAAGC | GTCGCGGTTC | CGGCGGCGTC | CGGTGAGCTC | TCGCTGGCCC | GTGAAAATCC | GGGGGAGAGG | GTGTAAATCT | CGCGCCGGGC |            |
| AADN03001775             | CCCAGAGAG  | GGGCCCGCGC | CTTGGAAAGC | GTCGCGGTTC | CGGCGGCGTC | CGGTGAGCTC | TCGCTGGCCC | GTGAAAATCC | GGGGGAGAGG | GTGTAAATCT | CGCGCCGGGC |            |
| EF552813                 | -----      | -----      | -----      | -----      | -----      | -----      | -----      | -----      | -----      | -----      | -----      |            |
| AADN03022685             | -----      | -----      | -----      | -----      | -----      | -----      | -----      | -----      | -----      | -----      | -----      |            |
| AADN03019346             | -----      | -----      | -----      | -----      | -----      | -----      | -----      | -----      | -----      | -----      | -----      |            |
| AADN03001776             | -----      | -----      | -----      | -----      | -----      | -----      | -----      | -----      | -----      | -----      | -----      |            |
| DQ018756                 | -----      | -----      | -----      | -----      | -----      | -----      | -----      | -----      | -----      | -----      | -----      |            |
| AF173612                 | -----      | -----      | -----      | -----      | -----      | -----      | -----      | -----      | -----      | -----      | -----      |            |
| Gallus_gallus_KT445934.2 | CCCAGAGAG  | GGGCCCGCGC | CTTGGAAAGC | GTCGCGGTTC | CGGCGGCGTC | CGGTGAGCTC | TCGCTGGCCC | GTGAAAATCC | GGGGGAGAGG | GTGTAAATCT | CGCGCCGGGC |            |
|                          | 9999999999 | 9999999999 | 9999999999 | 9999999999 | 9999999999 | 9999999999 | 9999999999 | 9999999999 | 9999999999 | 9999999999 | 9999999999 |            |
|                          | 6666666666 | 6666666667 | 7777777777 | 7777777777 | 7777777777 | 7777777777 | 7777777777 | 7777777777 | 7777777777 | 7777777777 | 7777777777 |            |
|                          | 8888888889 | 9999999990 | 0000000001 | 1111111112 | 2222222223 | 3333333334 | 4444444445 | 5555555556 | 6666666667 | 7777777778 | 8888888889 |            |
|                          | 1234567890 | 1234567890 | 1234567890 | 1234567890 | 1234567890 | 1234567890 | 1234567890 | 1234567890 | 1234567890 | 1234567890 | 1234567890 |            |
| AADN03001677             | -----      | -----      | -----      | -----      | -----      | -----      | -----      | -----      | -----      | -----      | -----      |            |
| AADN03001778             | -----      | -----      | -----      | -----      | -----      | -----      | -----      | -----      | -----      | -----      | -----      |            |
| AADN03001785             | -----      | -----      | -----      | -----      | -----      | -----      | -----      | -----      | -----      | -----      | -----      |            |
| AADN03001786             | -----      | -----      | -----      | -----      | -----      | -----      | -----      | -----      | -----      | -----      | -----      |            |
| AADN03001788             | -----      | -----      | -----      | -----      | -----      | -----      | -----      | -----      | -----      | -----      | -----      |            |
| AADN03014081             | -----      | -----      | -----      | -----      | -----      | -----      | -----      | -----      | -----      | -----      | -----      |            |
| AADN03015064             | -----      | -----      | -----      | -----      | -----      | -----      | -----      | -----      | -----      | -----      | -----      |            |
| AADN03026634             | -----      | -----      | -----      | -----      | -----      | -----      | -----      | -----      | -----      | -----      | -----      |            |
| NW_003775878             | -----      | -----      | -----      | -----      | -----      | -----      | -----      | -----      | -----      | -----      | -----      |            |
| DQ018752                 | -----      | -----      | -----      | -----      | -----      | -----      | -----      | -----      | -----      | -----      | -----      |            |
| DQ018757                 | -----      | -----      | -----      | -----      | -----      | -----      | -----      | -----      | -----      | -----      | -----      |            |
| DQ112354                 | -----      | -----      | -----      | -----      | -----      | -----      | -----      | -----      | -----      | -----      | -----      |            |
| FM165414                 | -----      | -----      | -----      | -----      | -----      | -----      | -----      | -----      | -----      | -----      | -----      |            |
| FM165415                 | CGTACCCATA | TCCGCAGCAG | GTCTCCAAGG | T-----     | -----      | -----      | -----      | -----      | -----      | -----      | -----      |            |
| AADN03000430             | -----      | -----      | -----      | -----      | -----      | -----      | -----      | -----      | -----      | -----      | -----      |            |
| AADN03001784             | -----      | -----      | -----      | -----      | -----      | -----      | -----      | -----      | -----      | -----      | -----      |            |
| AADN03001783             | -----      | -----      | -----      | -----      | -----      | -----      | -----      | -----      | -----      | -----      | -----      |            |
| DQ018754                 | -----      | -----      | -----      | -----      | -----      | -----      | -----      | -----      | -----      | -----      | -----      |            |
| AADN03001782             | -----      | -----      | -----      | -----      | -----      | -----      | -----      | -----      | -----      | -----      | -----      |            |
| JN639848                 | -----      | -----      | -----      | -----      | -----      | -----      | -----      | -----      | -----      | -----      | -----      |            |
| AADN03001670             | -----      | -----      | -----      | -----      | -----      | -----      | -----      | -----      | -----      | -----      | -----      |            |
| HQ873432                 | -----      | -----      | -----      | -----      | -----      | -----      | -----      | -----      | -----      | -----      | -----      |            |
| AADN03001774             | CGTACCCATA | TCCGCAGCAG | GTCTCCAAGG | TGAACAGCCT | CTGGCATGTT | GGACCAATGT | AGGTAAGGGA | AGTCGGCAAG | CCGGATCCGT | AACTTCGGGA | TAAGGATTGG |            |
| AADN03001775             | CGTACCCATA | TCCGCAGCAG | GTCTCCAAGG | TGAACAGCCT | CTGGCATGTT | GGACCAATGT | AGGTAAGGGA | AGTCGGCAAG | CCGGATCCGT | AACTTCGGGA | TAAGGATTGG |            |
| EF552813                 | -----      | -----      | -----      | -----      | -----      | -----      | -----      | -----      | -----      | -----      | -----      |            |
| AADN03022685             | -----      | -----      | -----      | -----      | -----      | -----      | -----      | -----      | -----      | -----      | -----      |            |
| AADN03019346             | -----      | -----      | -----      | -----      | -----      | -----      | -----      | -----      | -----      | -----      | -----      |            |
| AADN03001776             | -----      | -----      | -----      | -----      | -----CT    | CTGGCATGTT | GGACCAATGT | AGGTAAGGGA | AGTCGGCAAG | CCGGATCCGT | AACTTCGGGA | TAAGGATTGG |
| DQ018756                 | -----      | -----      | -----      | -----      | -----      | -----      | -----      | -----      | -----      | -----      | -----      |            |
| AF173612                 | -----      | -----      | -----      | -----      | -----      | -----      | -----      | -----      | -----      | -----      | -----      |            |
| Gallus_gallus_KT445934.2 | CGTACCCATA | TCCGCAGCAG | GTCTCCAAGG | TGAACAGCCT | CTGGCATGTT | GGACCAATGT | AGGTAAGGGA | AGTCGGCAAG | CCGGATCCGT | AACTTCGGGA | TAAGGATTGG |            |







```

FM165415 -----
AADN03000430 -----
AADN03001784 -----
AADN03001783 -----
DQ018754 -----
AADN03001782 -----
JN639848 -----
AADN03001670 -----
HQ873432 -----
AADN03001774 -----
AADN03001775 -----
EF552813 -----
AADN03022685 -----CTGTTT AATTAAAACA AAGCATCGCG ATGGCCGCGA ACGGGTGTG ACACGATGTG ATTTCTGCC AGTGCTCTGA
AADN03019346 CGGCTTAGAA CTGGTGC GGA CCAGGGGAAT CCGACTGTTT AATTAAAACA AAGCATCGCG ATGGCCGCGA ACGGGTGTG ACACGATGTG ATTTCTGCC AGTGCTCTGA
AADN03001776 CGGCTTAGAA CTGGTGC GGA CCAGGGGAAT CCGACTGTTT AATTAAAACA AAGCATCGCG AAGGCCCGCG GCGGGTGTG ACACGATGTG ATTTCTGCC AGTGCTCTGA
DQ018756 -----
AF173612 -----
Gallus_gallus_KT445934.2 CGGCTTAGAA CTGGTGC GGA CCAGGGGAAT CCGACTGTTT AATTAAAACA AAGCATCGCG AAGGCCCGCG GCGGGTGTG ACACGATGTG ATTTCTGCC AGTGCTCTGA

1111111111 1111111111 1111111111 1111111111 1111111111 1111111111 1111111111 1111111111 1111111111 1111111111 1111111111 1111111111
0000000000 0000000000 0000000000 0000000000 0000000000 0000000000 0000000000 0000000000 0000000000 0000000000 0000000000 0000000000
3333333333 3333333333 3333333333 3333333333 3333333333 3333333333 3333333333 4444444444 4444444444 4444444444 4444444444 4444444444
4444444444 5555555555 6666666666 7777777777 8888888888 9999999999 0000000001 1111111112 2222222223 3333333334 4444444445
1234567890 1234567890 1234567890 1234567890 1234567890 1234567890 1234567890 1234567890 1234567890 1234567890 1234567890 1234567890

AADN03001677 -----
AADN03001778 -----
AADN03001785 -----
AADN03001786 -----
AADN03001788 -----
AADN03014081 -----
AADN03015064 -----
AADN03026634 -----
NW_003775878 -----
DQ018752 -----
DQ018757 -----
DQ112354 -----
FM165414 -----
FM165415 -----
AADN03000430 -----
AADN03001784 -----
AADN03001783 -----
DQ018754 -----
AADN03001782 -----
JN639848 -----
AADN03001670 -----
HQ873432 -----
AADN03001774 -----
AADN03001775 -----
EF552813 -----
AADN03022685 ATGTCAAAGT GAAGAAATTC AATGAAGCGC GGGTAAACGG CGGGAGTAAC TATGACTCTC TTAAGGTAGC CAAATGCCTC GTCATCTAAT TAGTGACGCG CATGAATGGA
AADN03019346 ATGTCAAAGT GAAGAAATTC AATGAAGCGC GGGTAAACGG CGGGAGTAAC TATGACTCTC TTAAG-----
AADN03001776 ATGTCAAAGT GAAGAAATTC-----
DQ018756 -----
AF173612 -----
Gallus_gallus_KT445934.2 ATGTCAAAGT GAAGAAATTC AATGAAGCGC GGGTAAACGG CGGGAGTAAC TATGACTCTC TTAAGGTAGC CAAATGCCTC GTCATCTAAT TAGTGACGCG CATGAATGGA

```





|                          |            |            |            |            |            |            |            |            |            |            |            |
|--------------------------|------------|------------|------------|------------|------------|------------|------------|------------|------------|------------|------------|
| FM165414                 | -----      | -----      | -----      | -----      | -----      | -----      | -----      | -----      | -----      | -----      | -----      |
| FM165415                 | -----      | -----      | -----      | -----      | -----      | -----      | -----      | -----      | -----      | -----      | -----      |
| AADN03000430             | -----      | -----      | -----      | -----      | -----      | -----      | -----      | -----      | -----      | -----      | -----      |
| AADN03001784             | -----      | -----      | -----      | -----      | -----      | -----      | -----      | -----      | -----      | -----      | -----      |
| AADN03001783             | -----      | -----      | -----      | -----      | -----      | -----      | -----      | -----      | -----      | -----      | -----      |
| DQ018754                 | -----      | -----      | -----      | -----      | -----      | -----      | -----      | -----      | -----      | -----      | -----      |
| AADN03001782             | -----      | -----      | -----      | -----      | -----      | -----      | -----      | -----      | -----      | -----      | -----      |
| JN639848                 | -----      | -----      | -----      | -----      | -----      | -----      | -----      | -----      | -----      | -----      | -----      |
| AADN03001670             | -----      | -----      | -----      | -----      | -----      | -----      | -----      | -----      | -----      | -----      | -----      |
| HQ873432                 | -----      | -----      | -----      | -----      | -----      | -----      | -----      | -----      | -----      | -----      | -----      |
| AADN03001774             | -----      | -----      | -----      | -----      | -----      | -----      | -----      | -----      | -----      | -----      | -----      |
| AADN03001775             | -----      | -----      | -----      | -----      | -----      | -----      | -----      | -----      | -----      | -----      | -----      |
| EF552813                 | TGGCGCTGTG | AAGAGACATG | AGAGGTGTAG | AATAAGTGGG | AGGCCCGCG  | GTCGCGCGAC | CCGCGCCGCG | GCCCGGCCGC | CGGTGAAATA | CCACTACTCT | GATCGTTTTT |
| AADN03022685             | -----      | -----      | -----      | -----      | -----      | -----      | -----      | -----      | -----      | -----      | -----      |
| AADN03019346             | -----      | -----      | -----      | -----      | -----      | -----      | -----      | -----      | -----      | -----      | -----      |
| AADN03001776             | -----      | -----      | -----      | -----      | -----      | -----      | -----      | -----      | -----      | -----      | -----      |
| DQ018756                 | -----      | -----      | -----      | -----      | -----      | -----      | -----      | -----      | -----      | -----      | -----      |
| AF173612                 | -----      | -----      | -----      | -----      | -----      | -----      | -----      | -----      | -----      | -----      | -----      |
| Gallus_gallus_KT445934.2 | TGGCGCTGTG | AAGAGACATG | AGAGGTGTAG | AATAAGTGGG | AGGCCCGCG  | GTCGCGCGAC | CCGCGCCGCG | GCCCGGCCGC | CGGTGAAATA | CCACTACTCT | GATCGTTTTT |
|                          | 1111111111 | 1111111111 | 1111111111 | 1111111111 | 1111111111 | 1111111111 | 1111111111 | 1111111111 | 1111111111 | 1111111111 | 1111111111 |
|                          | 0000000000 | 0000000000 | 0000000000 | 0000000000 | 0000000000 | 0000000000 | 0000000000 | 0000000000 | 0000000000 | 0000000000 | 0000000000 |
|                          | 6666666666 | 6666666666 | 6666666667 | 7777777777 | 7777777777 | 7777777777 | 7777777777 | 7777777777 | 7777777777 | 7777777777 | 7777777777 |
|                          | 7777777778 | 8888888889 | 9999999990 | 0000000001 | 1111111112 | 2222222223 | 3333333334 | 4444444445 | 5555555556 | 6666666667 | 7777777778 |
|                          | 1234567890 | 1234567890 | 1234567890 | 1234567890 | 1234567890 | 1234567890 | 1234567890 | 1234567890 | 1234567890 | 1234567890 | 1234567890 |
| AADN03001677             | -----      | -----      | -----      | -----      | -----      | -----      | -----      | -----      | -----      | -----      | -----      |
| AADN03001778             | -----      | -----      | -----      | -----      | -----      | -----      | -----      | -----      | -----      | -----      | -----      |
| AADN03001785             | -----      | -----      | -----      | -----      | -----      | -----      | -----      | -----      | -----      | -----      | -----      |
| AADN03001786             | -----      | -----      | -----      | -----      | -----      | -----      | -----      | -----      | -----      | -----      | -----      |
| AADN03001788             | -----      | -----      | -----      | -----      | -----      | -----      | -----      | -----      | -----      | -----      | -----      |
| AADN03014081             | -----      | -----      | -----      | -----      | -----      | -----      | -----      | -----      | -----      | -----      | -----      |
| AADN03015064             | -----      | -----      | -----      | -----      | -----      | -----      | -----      | -----      | -----      | -----      | -----      |
| AADN03026634             | -----      | -----      | -----      | -----      | -----      | -----      | -----      | -----      | -----      | -----      | -----      |
| NW_003775878             | -----      | -----      | -----      | -----      | -----      | -----      | -----      | -----      | -----      | -----      | -----      |
| DQ018752                 | -----      | -----      | -----      | -----      | -----      | -----      | -----      | -----      | -----      | -----      | -----      |
| DQ018757                 | -----      | -----      | -----      | -----      | -----      | -----      | -----      | -----      | -----      | -----      | -----      |
| DQ112354                 | -----      | -----      | -----      | -----      | -----      | -----      | -----      | -----      | -----      | -----      | -----      |
| FM165414                 | -----      | -----      | -----      | -----      | -----      | -----      | -----      | -----      | -----      | -----      | -----      |
| FM165415                 | -----      | -----      | -----      | -----      | -----      | -----      | -----      | -----      | -----      | -----      | -----      |
| AADN03000430             | -----      | -----      | -----      | -----      | -----      | -----      | -----      | -----      | -----      | -----      | -----      |
| AADN03001784             | -----      | -----      | -----      | -----      | -----      | -----      | -----      | -----      | -----      | -----      | -----      |
| AADN03001783             | -----      | -----      | -----      | -----      | -----      | -----      | -----      | -----      | -----      | -----      | -----      |
| DQ018754                 | -----      | -----      | -----      | -----      | -----      | -----      | -----      | -----      | -----      | -----      | -----      |
| AADN03001782             | -----      | -----      | -----      | -----      | -----      | -----      | -----      | -----      | -----      | -----      | -----      |
| JN639848                 | -----      | -----      | -----      | -----      | -----      | -----      | -----      | -----      | -----      | -----      | -----      |
| AADN03001670             | -----      | -----      | -----      | -----      | -----      | -----      | -----      | -----      | -----      | -----      | -----      |
| HQ873432                 | -----      | -----      | -----      | -----      | -----      | -----      | -----      | -----      | -----      | -----      | -----      |
| AADN03001774             | -----      | -----      | -----      | -----      | -----      | -----      | -----      | -----      | -----      | -----      | -----      |
| AADN03001775             | -----      | -----      | -----      | -----      | -----      | -----      | -----      | -----      | -----      | -----      | -----      |
| EF552813                 | TCACTTACCC | GGTGAGGCGG | GGGGGCGAGC | CCCGAGGGGC | TCTCGTCTCT | GGCGCCAAGC | GCCCGGCGCG | CGCCGGGCGC | GACCCGCTCC | GGGGACAGCG | TCAGGTGGGG |
| AADN03022685             | -----      | -----      | -----      | -----      | -----      | -----      | -----      | -----      | -----      | -----      | -----      |
| AADN03019346             | -----      | -----      | -----      | -----      | -----      | -----      | -----      | -----      | -----      | -----      | -----      |
| AADN03001776             | -----      | -----      | -----      | -----      | -----      | -----      | -----      | -----      | -----      | -----      | -----      |
| DQ018756                 | -----      | -----      | -----      | -----      | -----      | -----      | -----      | -----      | -----      | -----      | -----      |
| AF173612                 | -----      | -----      | -----      | -----      | -----      | -----      | -----      | -----      | -----      | -----      | -----      |

|                          |            |            |            |            |            |            |            |            |            |            |            |
|--------------------------|------------|------------|------------|------------|------------|------------|------------|------------|------------|------------|------------|
| Gallus_gallus_KT445934.2 | TCACTTACCC | GGTGAGGCGG | GGGGGCGAGC | CCCCGAGGGC | TCTCGCTTCT | GGCGCCAAGC | GCCCCGGCGG | CGCCGGGCGC | GACCCGCTCC | GGGGACAGCG | TCAGGTGGGG |
|                          | 1111111111 | 1111111111 | 1111111111 | 1111111111 | 1111111111 | 1111111111 | 1111111111 | 1111111111 | 1111111111 | 1111111111 | 1111111111 |
|                          | 0000000000 | 0000000000 | 0000000000 | 0000000000 | 0000000000 | 0000000000 | 0000000000 | 0000000000 | 0000000000 | 0000000000 | 0000000000 |
|                          | 7777777777 | 7777777778 | 8888888888 | 8888888888 | 8888888888 | 8888888888 | 8888888888 | 8888888888 | 8888888888 | 8888888888 | 8888888888 |
|                          | 8888888889 | 9999999990 | 0000000001 | 1111111112 | 2222222223 | 3333333334 | 4444444445 | 5555555556 | 6666666667 | 7777777778 | 8888888889 |
|                          | 1234567890 | 1234567890 | 1234567890 | 1234567890 | 1234567890 | 1234567890 | 1234567890 | 1234567890 | 1234567890 | 1234567890 | 1234567890 |
| AADN03001677             | -----      | -----      | -----      | -----      | -----      | -----      | -----      | -----      | -----      | -----      | -----      |
| AADN03001778             | -----      | -----      | -----      | -----      | -----      | -----      | -----      | -----      | -----      | -----      | -----      |
| AADN03001785             | -----      | -----      | -----      | -----      | -----      | -----      | -----      | -----      | -----      | -----      | -----      |
| AADN03001786             | -----      | -----      | -----      | -----      | -----      | -----      | -----      | -----      | -----      | -----      | -----      |
| AADN03001788             | -----      | -----      | -----      | -----      | -----      | -----      | -----      | -----      | -----      | -----      | -----      |
| AADN03014081             | -----      | -----      | -----      | -----      | -----      | -----      | -----      | -----      | -----      | -----      | -----      |
| AADN03015064             | -----      | -----      | -----      | -----      | -----      | -----      | -----      | -----      | -----      | -----      | -----      |
| AADN03026634             | -----      | -----      | -----      | -----      | -----      | -----      | -----      | -----      | -----      | -----      | -----      |
| NW_003775878             | -----      | -----      | -----      | -----      | -----      | -----      | -----      | -----      | -----      | -----      | -----      |
| DQ018752                 | -----      | -----      | -----      | -----      | -----      | -----      | -----      | -----      | -----      | -----      | -----      |
| DQ018757                 | -----      | -----      | -----      | -----      | -----      | -----      | -----      | -----      | -----      | -----      | -----      |
| DQ112354                 | -----      | -----      | -----      | -----      | -----      | -----      | -----      | -----      | -----      | -----      | -----      |
| FM165414                 | -----      | -----      | -----      | -----      | -----      | -----      | -----      | -----      | -----      | -----      | -----      |
| FM165415                 | -----      | -----      | -----      | -----      | -----      | -----      | -----      | -----      | -----      | -----      | -----      |
| AADN03000430             | -----      | -----      | -----      | -----      | -----      | -----      | -----      | -----      | -----      | -----      | -----      |
| AADN03001784             | -----      | -----      | -----      | -----      | -----      | -----      | -----      | -----      | -----      | -----      | -----      |
| AADN03001783             | -----      | -----      | -----      | -----      | -----      | -----      | -----      | -----      | -----      | -----      | -----      |
| DQ018754                 | -----      | -----      | -----      | -----      | -----      | -----      | -----      | -----      | -----      | -----      | -----      |
| AADN03001782             | -----      | -----      | -----      | -----      | -----      | -----      | -----      | -----      | -----      | -----      | -----      |
| JN639848                 | -----      | -----      | -----      | -----      | -----      | -----      | -----      | -----      | -----      | -----      | -----      |
| AADN03001670             | -----      | -----      | -----      | -----      | -----      | -----      | -----      | -----      | -----      | -----      | -----      |
| HQ873432                 | -----      | -----      | -----      | -----      | -----      | -----      | -----      | -----      | -----      | -----      | -----      |
| AADN03001774             | -----      | -----      | -----      | -----      | -----      | -----      | -----      | -----      | -----      | -----      | -----      |
| AADN03001775             | -----      | -----      | -----      | -----      | -----      | -----      | -----      | -----      | -----      | -----      | -----      |
| EF552813                 | AGTTTGACTG | GGGCGGTACA | CCTGTCAAAG | CGTAACGCAG | GTGTCTTAAG | GCGAGCTCAG | GGAGGCCAGA | AACCTCCCGT | GGAGCAGAAG | GGCAAAAGCT | CGCTTGATCT |
| AADN03022685             | -----      | -----      | -----      | -----      | -----      | -----      | -----      | -----      | -----      | -----      | -----      |
| AADN03019346             | -----      | -----      | -----      | -----      | -----      | -----      | -----      | -----      | -----      | -----      | -----      |
| AADN03001776             | -----      | -----      | -----      | -----      | -----      | -----      | -----      | -----      | -----      | -----      | -----      |
| DQ018756                 | -----      | -----      | -----      | -----      | -----      | -----      | -----      | -----      | -----      | -----      | -----      |
| AF173612                 | -----      | -----      | -----      | -----      | -----      | -----      | -----      | -----      | -----      | -----      | -----      |
| Gallus_gallus_KT445934.2 | AGTTTGACTG | GGGCGGTACA | CCTGTCAAAG | CGTAACGCAG | GTGTCTTAAG | GCGAGCTCAG | GGAGGCCAGA | AACCTCCCGT | GGAGCAGAAG | GGCAAAAGCT | CGCTTGATCT |
|                          | 1111111111 | 1111111111 | 1111111111 | 1111111111 | 1111111111 | 1111111111 | 1111111111 | 1111111111 | 1111111111 | 1111111111 | 1111111111 |
|                          | 0000000000 | 0000000000 | 0000000000 | 0000000000 | 0000000000 | 0000000000 | 0000000000 | 0000000000 | 0000000000 | 0000000000 | 0000000001 |
|                          | 8888888889 | 9999999999 | 9999999999 | 9999999999 | 9999999999 | 9999999999 | 9999999999 | 9999999999 | 9999999999 | 9999999999 | 9999999990 |
|                          | 9999999990 | 0000000001 | 1111111112 | 2222222223 | 3333333334 | 4444444445 | 5555555556 | 6666666667 | 7777777778 | 8888888889 | 9999999990 |
|                          | 1234567890 | 1234567890 | 1234567890 | 1234567890 | 1234567890 | 1234567890 | 1234567890 | 1234567890 | 1234567890 | 1234567890 | 1234567890 |
| AADN03001677             | -----      | -----      | -----      | -----      | -----      | -----      | -----      | -----      | -----      | -----      | -----      |
| AADN03001778             | -----      | -----      | -----      | -----      | -----      | -----      | -----      | -----      | -----      | -----      | -----      |
| AADN03001785             | -----      | -----      | -----      | -----      | -----      | -----      | -----      | -----      | -----      | -----      | -----      |
| AADN03001786             | -----      | -----      | -----      | -----      | -----      | -----      | -----      | -----      | -----      | -----      | -----      |
| AADN03001788             | -----      | -----      | -----      | -----      | -----      | -----      | -----      | -----      | -----      | -----      | -----      |
| AADN03014081             | -----      | -----      | -----      | -----      | -----      | -----      | -----      | -----      | -----      | -----      | -----      |
| AADN03015064             | -----      | -----      | -----      | -----      | -----      | -----      | -----      | -----      | -----      | -----      | -----      |
| AADN03026634             | -----      | -----      | -----      | -----      | -----      | -----      | -----      | -----      | -----      | -----      | -----      |
| NW_003775878             | -----      | -----      | -----      | -----      | -----      | -----      | -----      | -----      | -----      | -----      | -----      |
| DQ018752                 | -----      | -----      | -----      | -----      | -----      | -----      | -----      | -----      | -----      | -----      | -----      |
| DQ018757                 | -----      | -----      | -----      | -----      | -----      | -----      | -----      | -----      | -----      | -----      | -----      |

|                          |            |            |            |            |            |            |            |            |            |            |            |
|--------------------------|------------|------------|------------|------------|------------|------------|------------|------------|------------|------------|------------|
| DQ112354                 | -----      | -----      | -----      | -----      | -----      | -----      | -----      | -----      | -----      | -----      | -----      |
| FM165414                 | -----      | -----      | -----      | -----      | -----      | -----      | -----      | -----      | -----      | -----      | -----      |
| FM165415                 | -----      | -----      | -----      | -----      | -----      | -----      | -----      | -----      | -----      | -----      | -----      |
| AADN03000430             | -----      | -----      | -----      | -----      | -----      | -----      | -----      | -----      | -----      | -----      | -----      |
| AADN03001784             | -----      | -----      | -----      | -----      | -----      | -----      | -----      | -----      | -----      | -----      | -----      |
| AADN03001783             | -----      | -----      | -----      | -----      | -----      | -----      | -----      | -----      | -----      | -----      | -----      |
| DQ018754                 | -----      | -----      | -----      | -----      | -----      | -----      | -----      | -----      | -----      | -----      | -----      |
| AADN03001782             | -----      | -----      | -----      | -----      | -----      | -----      | -----      | -----      | -----      | -----      | -----      |
| JN639848                 | -----      | -----      | -----      | -----      | -----      | -----      | -----      | -----      | -----      | -----      | -----      |
| AADN03001670             | -----      | -----      | -----      | -----      | -----      | -----      | -----      | -----      | -----      | -----      | -----      |
| HQ873432                 | -----      | -----      | -----      | -----      | -----      | -----      | -----      | -----      | -----      | -----      | -----      |
| AADN03001774             | -----      | -----      | -----      | -----      | -----      | -----      | -----      | -----      | -----      | -----      | -----      |
| AADN03001775             | -----      | -----      | -----      | -----      | -----      | -----      | -----      | -----      | -----      | -----      | -----      |
| EF552813                 | TGATTTTCAG | TACGAATACA | GACCGTGAAA | GCGGGGCCTC | ACGATCCTTC | TGACTTTTTG | GGTTTTAAGC | AGGAGGTGTC | AGAAAAGTTA | CCACAGGGAT | AACTGGCTTG |
| AADN03022685             | -----      | -----      | -----      | -----      | -----      | -----      | -----      | -----      | -----      | -----      | -----      |
| AADN03019346             | -----      | -----      | -----      | -----      | -----      | -----      | -----      | -----      | -----      | -----      | -----      |
| AADN03001776             | -----      | -----      | -----      | -----      | -----      | -----      | -----      | -----      | -----      | -----      | -----      |
| DQ018756                 | -----      | -----      | -----      | -----      | -----      | -----      | -----      | -----      | -----      | -----      | -----      |
| AF173612                 | -----      | -----      | -----      | -----      | -----      | -----      | -----      | -----      | -----      | -----      | -----      |
| Gallus_gallus_KT445934.2 | TGATTTTCAG | TACGAATACA | GACCGTGAAA | GCGGGGCCTC | ACGATCCTTC | TGACTTTTTG | GGTTTTAAGC | AGGAGGTGTC | AGAAAAGTTA | CCACAGGGAT | AACTGGCTTG |
|                          | 1111111111 | 1111111111 | 1111111111 | 1111111111 | 1111111111 | 1111111111 | 1111111111 | 1111111111 | 1111111111 | 1111111111 | 1111111111 |
|                          | 1111111111 | 1111111111 | 1111111111 | 1111111111 | 1111111111 | 1111111111 | 1111111111 | 1111111111 | 1111111111 | 1111111111 | 1111111111 |
|                          | 0000000000 | 0000000000 | 0000000000 | 0000000000 | 0000000000 | 0000000000 | 0000000000 | 0000000000 | 0000000000 | 0000000001 | 1111111111 |
|                          | 0000000001 | 1111111112 | 2222222223 | 3333333334 | 4444444445 | 5555555556 | 6666666667 | 7777777778 | 8888888889 | 9999999990 | 0000000001 |
|                          | 1234567890 | 1234567890 | 1234567890 | 1234567890 | 1234567890 | 1234567890 | 1234567890 | 1234567890 | 1234567890 | 1234567890 | 1234567890 |
| AADN03001677             | -----      | -----      | -----      | -----      | -----      | -----      | -----      | -----      | -----      | -----      | -----      |
| AADN03001778             | -----      | -----      | -----      | -----      | -----      | -----      | -----      | -----      | -----      | -----      | -----      |
| AADN03001785             | -----      | -----      | -----      | -----      | -----      | -----      | -----      | -----      | -----      | -----      | -----      |
| AADN03001786             | -----      | -----      | -----      | -----      | -----      | -----      | -----      | -----      | -----      | -----      | -----      |
| AADN03001788             | -----      | -----      | -----      | -----      | -----      | -----      | -----      | -----      | -----      | -----      | -----      |
| AADN03014081             | -----      | -----      | -----      | -----      | -----      | -----      | -----      | -----      | -----      | -----      | -----      |
| AADN03015064             | -----      | -----      | -----      | -----      | -----      | -----      | -----      | -----      | -----      | -----      | -----      |
| AADN03026634             | -----      | -----      | -----      | -----      | -----      | -----      | -----      | -----      | -----      | -----      | -----      |
| NW_003775878             | -----      | -----      | -----      | -----      | -----      | -----      | -----      | -----      | -----      | -----      | -----      |
| DQ018752                 | -----      | -----      | -----      | -----      | -----      | -----      | -----      | -----      | -----      | -----      | -----      |
| DQ018757                 | -----      | -----      | -----      | -----      | -----      | -----      | -----      | -----      | -----      | -----      | -----      |
| DQ112354                 | -----      | -----      | -----      | -----      | -----      | -----      | -----      | -----      | -----      | -----      | -----      |
| FM165414                 | -----      | -----      | -----      | -----      | -----      | -----      | -----      | -----      | -----      | -----      | -----      |
| FM165415                 | -----      | -----      | -----      | -----      | -----      | -----      | -----      | -----      | -----      | -----      | -----      |
| AADN03000430             | -----      | -----      | -----      | -----      | -----      | -----      | -----      | -----      | -----      | -----      | -----      |
| AADN03001784             | -----      | -----      | -----      | -----      | -----      | -----      | -----      | -----      | -----      | -----      | -----      |
| AADN03001783             | -----      | -----      | -----      | -----      | -----      | -----      | -----      | -----      | -----      | -----      | -----      |
| DQ018754                 | -----      | -----      | -----      | -----      | -----      | -----      | -----      | -----      | -----      | -----      | -----      |
| AADN03001782             | -----      | -----      | -----      | -----      | -----      | -----      | -----      | -----      | -----      | -----      | -----      |
| JN639848                 | -----      | -----      | -----      | -----      | -----      | -----      | -----      | -----      | -----      | -----      | -----      |
| AADN03001670             | -----      | -----      | -----      | -----      | -----      | -----      | -----      | -----      | -----      | -----      | -----      |
| HQ873432                 | -----      | -----      | -----      | -----      | -----      | -----      | -----      | -----      | -----      | -----      | -----      |
| AADN03001774             | -----      | -----      | -----      | -----      | -----      | -----      | -----      | -----      | -----      | -----      | -----      |
| AADN03001775             | -----      | -----      | -----      | -----      | -----      | -----      | -----      | -----      | -----      | -----      | -----      |
| EF552813                 | TGGCGGCCAA | GCGTTCATAG | CGACGTCGCT | TTTTGATCCT | TCGATGTCGG | CTCTTCCTAT | CATTGTGAAG | CAGAATTCAC | CAAGCGTTGG | AT-----    | -----      |
| AADN03022685             | -----      | -----      | -----      | -----      | -----      | -----      | -----      | -----      | -----      | -----      | -----      |
| AADN03019346             | -----      | -----      | -----      | -----      | -----      | -----      | -----      | -----      | -----      | -----      | -----      |
| AADN03001776             | -----      | -----      | -----      | -----      | -----      | -----      | -----      | -----      | -----      | -----      | -----      |
| DQ018756                 | -----      | -----      | -----      | -----      | -----      | -----      | -----      | -----      | -----      | -----      | -----      |















```
AADN03019346 -----
AADN03001776 -----
DQ018756 -----
AF173612 -----
Gallus_gallus_KT445934.2 CCCGGCCCCG CCCAGCACGC CCCCCGCCG GCAAGTGGCT GCGGTGCCGA GGTGGCGGGT AGACCTGGCG GCCGGCA
```
