# Supplementary material for: Chicken rRNA Gene Cluster Structure
Source: PubMed Central journal article supplement (PMC4907446; doi:10.1371/journal.pone.0157464), 2016-06-14
Supplement: pone.0157464.s011.pdf [file pone.0157464.s011.pdf]

|                             |            |            |            |            |            |            |            |            |            |            |            |            |
|-----------------------------|------------|------------|------------|------------|------------|------------|------------|------------|------------|------------|------------|------------|
|                             | 1111111111 | 1111111111 | 1111111111 | 1111111111 | 1111111111 | 1111111111 | 1111111111 | 1111111111 | 1111111111 | 1111111111 | 1111111111 | 1111111111 |
|                             | 6666666666 | 6666666666 | 6666666666 | 6666666666 | 6666666666 | 7777777777 | 7777777777 | 7777777777 | 7777777777 | 7777777777 | 7777777777 | 7777777777 |
|                             | 5555555556 | 6666666667 | 7777777778 | 8888888889 | 9999999990 | 0000000001 | 1111111112 | 2222222223 | 3333333334 | 4444444445 | 5555555556 | 6666666667 |
|                             | 1234567890 | 1234567890 | 1234567890 | 1234567890 | 1234567890 | 1234567890 | 1234567890 | 1234567890 | 1234567890 | 1234567890 | 1234567890 | 1234567890 |
| Crocodylus_porosus_EU727191 | -----      | -----      | -----      | -----      | -----      | -----      | -----      | -----      | -----      | -----      | -----      | -----      |
| Xenopus_laevis_X02995       | -----      | -----      | -----      | -----      | -----      | -----      | -----      | -----      | -----      | -----      | -----      | -----      |
| Mus_musculus_NR_046233      | GCGCAGCGTT | TGCTCTCTCG | TCTACGCGG  | CCCGGCGCCT | CCCCGCTCCG | AGTTCGGGGA | GGGATCACGC | GGGGCAGAGC | CTGTCTGTGC | TCCTGCCGTT | GCTGCGGAGC | GCTGCGGAGC |
| Homo_sapiens_U13369         | ACCGCAGGGC | CCCCTCCCTT | CCCCAGGCGT | CCCTCGGCGC | CTCTGCGGGC | CCGAGGAGGA | GCGGCTGGCG | GGTGGGGGGA | GTGTGACCCA | CCCTCGGTGA | GAAAAGCCTT | GAAAAGCCTT |
| Rattus_norvegicus_NR_046239 | -----      | -----      | -----      | -----      | -----      | -----      | -----      | -----      | -----      | -----      | -----      | -----      |
| Gallus_gallus_KT445934.2    | -----      | -----      | -----      | -----      | -----      | -----      | -----      | -----      | -----      | -----      | -----      | -----      |
|                             | 1111111111 | 1111111111 | 1111111111 | 1111111111 | 1111111111 | 1111111111 | 1111111111 | 1111111111 | 1111111111 | 1111111111 | 1111111111 | 1111111111 |
|                             | 7777777777 | 7777777777 | 7777777777 | 7777777778 | 8888888888 | 8888888888 | 8888888888 | 8888888888 | 8888888888 | 8888888888 | 8888888888 | 8888888888 |
|                             | 6666666667 | 7777777778 | 8888888889 | 9999999990 | 0000000001 | 1111111112 | 2222222223 | 3333333334 | 4444444445 | 5555555556 | 6666666667 | 7777777778 |
|                             | 1234567890 | 1234567890 | 1234567890 | 1234567890 | 1234567890 | 1234567890 | 1234567890 | 1234567890 | 1234567890 | 1234567890 | 1234567890 | 1234567890 |
| Crocodylus_porosus_EU727191 | -----      | -----      | -----      | -----      | -----      | -----      | -----      | -----      | -----      | -----      | -----      | -----      |
| Xenopus_laevis_X02995       | -----      | -----      | -----      | -----      | -----      | -----      | -----      | -----      | -----      | -----      | -----      | -----      |
| Mus_musculus_NR_046233      | ATGTGGCTCG | GCTTGTGTGG | TTGGTGGCTG | GGGAGAGGGC | TCCGTGCACA | CCCCCGCGTG | CGCGTACTTT | CCTCCCTCC  | TGAGGGCCGC | CGTGCAGGAC | GGTGTGGGT  | GGTGTGGGT  |
| Homo_sapiens_U13369         | CTCTAGCGAT | CTGAGAGGCG | TGCCTTGGGG | GTACCGGATC | CCCCGGGCCG | CCGCTCTGT  | CTCTGCCTCC | GTTATGGTAG | CGCTGCCGTA | GCGACCCGCT | CGCAGAGGAC | CGCAGAGGAC |
| Rattus_norvegicus_NR_046239 | -----      | -----      | -----      | -----      | -----      | -----      | -----      | -----      | -----      | -----      | -----      | -----      |
| Gallus_gallus_KT445934.2    | -----      | -----      | -----      | -----      | -----      | -----      | -----      | -----      | -----      | -----      | -----      | -----      |
|                             | 1111111111 | 1111111111 | 1111111111 | 1111111111 | 1111111111 | 1111111111 | 1111111111 | 1111111111 | 1111111111 | 1111111111 | 1111111111 | 1111111111 |
|                             | 8888888888 | 8888888888 | 8888888889 | 9999999999 | 9999999999 | 9999999999 | 9999999999 | 9999999999 | 9999999999 | 9999999999 | 9999999999 | 9999999999 |
|                             | 7777777778 | 8888888889 | 9999999990 | 0000000001 | 1111111112 | 2222222223 | 3333333334 | 4444444445 | 5555555556 | 6666666667 | 7777777778 | 8888888889 |
|                             | 1234567890 | 1234567890 | 1234567890 | 1234567890 | 1234567890 | 1234567890 | 1234567890 | 1234567890 | 1234567890 | 1234567890 | 1234567890 | 1234567890 |
| Crocodylus_porosus_EU727191 | -----      | -----      | -----      | -----      | -----      | -----      | -----      | -----      | -----      | -----      | -----      | -----      |
| Xenopus_laevis_X02995       | -----      | -----      | -----      | -----      | -----      | -----      | -----      | -----      | -----      | -----      | -----      | -----      |
| Mus_musculus_NR_046233      | AGGCGACGGT | GGGCTCCCGG | GTCCCCACCC | GTCTTCCCGT | GCCTCACCCG | TGCCTTCCGT | CGCGTGCCTC | CCTCTCGCTC | GCGTCCACGA | CTTTGGCCGC | TCCCGCGAGC | TCCCGCGAGC |
| Homo_sapiens_U13369         | CCTCCTCCGC | TTCCCCCTCG | ACGGGGTTGG | GGGGGAGAAG | CGAGGGTTCC | GCCGGCCACC | GCGGTGGTGG | CCGAGTCCGG | CTCGTCGCCT | ACTGTGGCCC | GCGCCTCCCC | GCGCCTCCCC |
| Rattus_norvegicus_NR_046239 | -----      | -----      | -----      | -----      | -----      | -----      | -----      | -----      | -----      | -----      | -----      | -----      |
| Gallus_gallus_KT445934.2    | -----      | -----      | -----      | -----      | -----      | -----      | -----      | -----      | -----      | -----      | -----      | -----      |
|                             | 1111111111 | 1111111112 | 2222222222 | 2222222222 | 2222222222 | 2222222222 | 2222222222 | 2222222222 | 2222222222 | 2222222222 | 2222222222 | 2222222222 |
|                             | 9999999999 | 9999999990 | 0000000000 | 0000000000 | 0000000000 | 0000000000 | 0000000000 | 0000000000 | 0000000000 | 0000000000 | 0000000000 | 0000000000 |
|                             | 8888888889 | 9999999990 | 0000000001 | 1111111112 | 2222222223 | 3333333334 | 4444444445 | 5555555556 | 6666666667 | 7777777778 | 8888888889 | 9999999990 |
|                             | 1234567890 | 1234567890 | 1234567890 | 1234567890 | 1234567890 | 1234567890 | 1234567890 | 1234567890 | 1234567890 | 1234567890 | 1234567890 | 1234567890 |
| Crocodylus_porosus_EU727191 | -----      | -----      | -----      | -----      | -----      | -----      | -----      | -----      | -----      | -----      | -----      | -----      |
| Xenopus_laevis_X02995       | -----      | -----      | -----      | -----      | -----      | -----      | -----      | -----      | -----      | -----      | -----      | -----      |
| Mus_musculus_NR_046233      | GCGGCCTGCG | CCGCGCGTGG | TGCGTGTGCT | GTGCTTCTCG | GGCTGTGTGG | TTGTGTGCGC | TGCGCCCCCC | CTTCCCGCGG | CAGCGTTCCC | ACGGCTGGGG | AAATCGCGGG | AAATCGCGGG |
| Homo_sapiens_U13369         | CTTCCGAGTC | GGGGGAGGAT | CCCCCGGGGC | CGGGCCCCGC | GCTCCCACCC | AGCGGGTTGG | GACGCGGGCG | CCGCGGGGCG | GTGGGTGTGC | GCGCCCCGCG | CTCTGTCCGG | CTCTGTCCGG |
| Rattus_norvegicus_NR_046239 | -----      | -----      | -----      | -----      | -----      | -----      | -----      | -----      | -----      | -----      | -----      | -----      |
| Gallus_gallus_KT445934.2    | -----      | -----      | -----      | -----      | -----      | -----      | -----      | -----      | -----      | -----      | -----      | -----      |
|                             | 2222222222 | 2222222222 | 2222222222 | 2222222222 | 2222222222 | 2222222222 | 2222222222 | 2222222222 | 2222222222 | 2222222222 | 2222222222 | 2222222222 |
|                             | 0000000001 | 1111111111 | 1111111111 | 1111111111 | 1111111111 | 1111111111 | 1111111111 | 1111111111 | 1111111111 | 1111111111 | 1111111111 | 1111111112 |
|                             | 9999999990 | 0000000001 | 1111111112 | 2222222223 | 3333333334 | 4444444445 | 5555555556 | 6666666667 | 7777777778 | 8888888889 | 9999999990 | 0000000001 |
|                             | 1234567890 | 1234567890 | 1234567890 | 1234567890 | 1234567890 | 1234567890 | 1234567890 | 1234567890 | 1234567890 | 1234567890 | 1234567890 | 1234567890 |
| Crocodylus_porosus_EU727191 | -----      | -----      | -----      | -----      | -----      | -----      | -----      | -----      | -----      | -----      | -----      | -----      |
| Xenopus_laevis_X02995       | -----      | -----      | -----      | -----      | -----      | -----      | -----      | -----      | -----      | -----      | -----      | -----      |
| Mus_musculus_NR_046233      | AGTCTCCTT  | CCCTCCTCG  | GGGTCGAGAG | GGTCCGTGTC | TGGCGTTGAT | TGATCTCGCT | CTCGGGGACG | GGACCGTTCT | GTGGGAGAAC | GGCTGTTGTC | CGCGTCCGGC | CGCGTCCGGC |
| Homo_sapiens_U13369         | CGCGTGACCC | CCTCCGTCCG | CGAGTCGGCT | CTCCGCCCGC | TCCCGTGCCG | AGTCTGACCC | GGTGCCGACG | ACCGCGTTTG | CGTGGCACGG | GGTCGGGCCC | GCCTGGCCCT | GCCTGGCCCT |
| Rattus_norvegicus_NR_046239 | -----      | -----      | -----      | -----      | -----      | -----      | -----      | -----      | -----      | -----      | -----      | -----      |



|                             |            |            |            |            |            |            |            |            |            |            |             |            |            |
|-----------------------------|------------|------------|------------|------------|------------|------------|------------|------------|------------|------------|-------------|------------|------------|
| Rattus_norvegicus_NR_046239 | -----      | -----      | -----      | -----      | -----      | -----      | -----      | -----      | -----      | -----      | -----       | -----      | -----      |
| Gallus_gallus_KT445934.2    | CGTGGCGCTC | CTCGGGCGCG | TCGGGGAGGC | TTCCCGGCGG | GCCCGCTCTA | TCCCGCTCCC | CGGCTCGTTC | GGGGTGGCGT | GGGGCGGGCC | GGTGTTCAGG | CACGGGCGAG  |            |            |
|                             | 2222222222 | 2222222222 | 2222222222 | 2222222222 | 2222222222 | 2222222222 | 2222222222 | 2222222222 | 2222222222 | 2222222222 | 2222222222  | 2222222222 | 2222222222 |
|                             | 7777777777 | 7777777777 | 7777777777 | 7777777777 | 7777777777 | 7777777777 | 7777777777 | 7777777777 | 7777777777 | 7777777777 | 7777777777  | 7777777777 | 7777777777 |
|                             | 5555555556 | 6666666667 | 7777777778 | 8888888889 | 9999999990 | 0000000001 | 1111111112 | 2222222223 | 3333333334 | 4444444445 | 5555555556  | 6666666667 | 7777777778 |
|                             | 1234567890 | 1234567890 | 1234567890 | 1234567890 | 1234567890 | 1234567890 | 1234567890 | 1234567890 | 1234567890 | 1234567890 | 1234567890  | 1234567890 | 1234567890 |
| Crocodylus_porosus_EU727191 | -----      | -----      | -----      | -----      | -----      | -----      | -----      | -----      | -----      | -----      | -----       | -----      | -----      |
| Xenopus_laevis_X02995       | -----      | -----      | -----      | -----      | -----      | -----      | -----      | -----      | -----      | -----      | -----       | -----      | -----      |
| Mus_musculus_NR_046233      | TCTTGCAGCG | TCTTGGAGAG | GGCTGCGTGC | GAGGGGAAAA | GGTTGCCCCG | CGAGGGCAAA | GGAAGAGAG  | CTAGCAGTGG | TCATGTGCC  | GACGGTGTGG | TGGTCTGTTC  |            |            |
| Homo_sapiens_U13369         | GGCCCGGTGG | GCTTCCCGGA | GGGTTCCGGG | GGTCCGCCTG | CGGCCGCTGC | GGGGGAGGAG | ACGGTTCGGG | GGGACCGGCC | GCGGCTGCGG | CGGCGGCGGT | GGTGGGGGGA  |            |            |
| Rattus_norvegicus_NR_046239 | -----      | -----      | -----      | -----      | -----      | -----      | -----      | -----      | -----      | -----      | -----       | -----      | -----      |
| Gallus_gallus_KT445934.2    | CACCTCTCGT | CGGACGTTGC | CCACGCACAC | CCACCTGCAC | GTGCGCGTGC | GGTCTTTCCG | CCGCGCCTGG | GGGAAGGGCT | CGCGCCTTCT | CCCTCCTTTC | TTTCTCTCTC  |            |            |
|                             | 2222222222 | 2222222222 | 2222222222 | 2222222222 | 2222222222 | 2222222222 | 2222222222 | 2222222222 | 2222222222 | 2222222222 | 2222222222  | 2222222222 | 2222222222 |
|                             | 8888888888 | 8888888888 | 8888888888 | 8888888888 | 8888888889 | 9999999999 | 9999999999 | 9999999999 | 9999999999 | 9999999999 | 9999999999  | 9999999999 | 9999999999 |
|                             | 6666666667 | 7777777778 | 8888888889 | 9999999990 | 0000000001 | 1111111112 | 2222222223 | 3333333334 | 4444444445 | 5555555556 | 6666666667  | 7777777778 | 8888888889 |
|                             | 1234567890 | 1234567890 | 1234567890 | 1234567890 | 1234567890 | 1234567890 | 1234567890 | 1234567890 | 1234567890 | 1234567890 | 1234567890  | 1234567890 | 1234567890 |
| Crocodylus_porosus_EU727191 | -----      | -----      | -----      | -----      | -----      | -----      | -----      | -----      | -----      | -----      | -----       | -----      | -----      |
| Xenopus_laevis_X02995       | -----      | -----      | -----      | -----      | -----      | -----      | -----      | -----      | -----      | -----      | -----       | -----      | -----      |
| Mus_musculus_NR_046233      | GCCGAGGTGC | GTCTGGGGGG | CTCGTCCGGC | CCTGTCTGTC | GTCGGGAAGG | CGCGTGTTCG | GGCCTGCCGG | AGTGCCGAGG | TGGGTACCCT | GGCGGTGGGA | TTAACCCCGC  |            |            |
| Homo_sapiens_U13369         | GCCGCGGGGG | TCGCCGAGGG | CCGCTCCGGC | GCCCCGGGTG | CCCCGCGGTG | CCGCCGCGGG | CGGTGAGGCC | CCGCGCGTGT | GTCCCGGCTG | CGGTCGGGCC | CGCTCGAGGG  |            |            |
| Rattus_norvegicus_NR_046239 | -----      | -----      | -----      | -----      | -----      | -----      | -----      | -----      | -----      | -----      | -----       | -----      | -----      |
| Gallus_gallus_KT445934.2    | CCCCACCCC  | CTTCTCCCA  | CCGATCGATG | AGGCCACTCG | GGTCGCGTCG | GAGAGGGCCC | CCGGCGGGCC | GGCGCTCTGC | GCTCCCTGTC | CCAGGGAAGC | CGCGGCGGGC  |            |            |
|                             | 2222222222 | 2222222222 | 2222222223 | 3333333333 | 3333333333 | 3333333333 | 3333333333 | 3333333333 | 3333333333 | 3333333333 | 3333333333  | 3333333333 | 3333333333 |
|                             | 9999999999 | 9999999999 | 9999999990 | 0000000000 | 0000000000 | 0000000000 | 0000000000 | 0000000000 | 0000000000 | 0000000000 | 0000000000  | 0000000000 | 0000000000 |
|                             | 7777777778 | 8888888889 | 9999999990 | 0000000001 | 1111111112 | 2222222223 | 3333333334 | 4444444445 | 5555555556 | 6666666667 | 7777777778  | 8888888889 | 9999999990 |
|                             | 1234567890 | 1234567890 | 1234567890 | 1234567890 | 1234567890 | 1234567890 | 1234567890 | 1234567890 | 1234567890 | 1234567890 | 1234567890  | 1234567890 | 1234567890 |
| Crocodylus_porosus_EU727191 | -----      | -----      | -----      | -----      | -----      | -----      | -----      | -----      | -----      | -----      | -----       | -----      | -----      |
| Xenopus_laevis_X02995       | -----CTG   | CAGCCCCACC | GGGAGTTCCA | GGAGTTCGGG | CAGGGGAGGC | CGGCTCGTCC | CCCGGCACCG | GAGGTCCCCG | GGCCCTTTGG | CGCCCGTTTC | TTGCGAAAGT  |            |            |
| Mus_musculus_NR_046233      | GCGCGTGTCC | CGGTGTGGCG | GTGGGGGCTC | CGGTCGATGT | CTACCTCCCT | CTCCCGGAGG | TCTCAGGCCT | TCTCCGCGCG | GGCTCTCGGC | CCTCCCTCG  | TTCTCCCTC   |            |            |
| Homo_sapiens_U13369         | GTCCCGTGG  | CGTCCCTTC  | CCCGCCGGCC | GCCTTCTCTG | CGCTTCCCTC | GTCGCCCGG  | CCTCGCCCGT | GGTCTCTCTG | CTTCTCCCGG | CCGCTCTTTC | CGAACCGGGT  |            |            |
| Rattus_norvegicus_NR_046239 | -----      | -----      | -----      | -----      | -----      | -----      | -----      | -----      | -----      | -----      | -----       | -----      | -----      |
| Gallus_gallus_KT445934.2    | TCCGGTGTTC | AGGCACGGGC | GGCCTCCTCT | CCAGTTCGCT | TCCGTCGTT  | CGCGAGGTGA | GCGCTCGCC  | CGCTTGGGCC | GAGGGCGGGC | GCGCGGGCGG | C TTCGGGGCG |            |            |
|                             | 3333333333 | 3333333333 | 3333333333 | 3333333333 | 3333333333 | 3333333333 | 3333333333 | 3333333333 | 3333333333 | 3333333333 | 3333333333  | 3333333333 | 3333333333 |
|                             | 0000000000 | 0000000001 | 1111111111 | 1111111111 | 1111111111 | 1111111111 | 1111111111 | 1111111111 | 1111111111 | 1111111111 | 1111111111  | 1111111111 | 1111111111 |
|                             | 8888888889 | 9999999990 | 0000000001 | 1111111112 | 2222222223 | 3333333334 | 4444444445 | 5555555556 | 6666666667 | 7777777778 | 8888888889  | 9999999990 | 0000000001 |
|                             | 1234567890 | 1234567890 | 1234567890 | 1234567890 | 1234567890 | 1234567890 | 1234567890 | 1234567890 | 1234567890 | 1234567890 | 1234567890  | 1234567890 | 1234567890 |
| Crocodylus_porosus_EU727191 | -----      | -----      | -----      | -----      | -----      | -----      | -----      | -----      | -----      | -----      | -----       | -----      | -----      |
| Xenopus_laevis_X02995       | GCGGCGCCCG | CGGGGACTTG | CTCGGCCGGG | CCGGGCCCGG | GCGGCCCGGG | GGCCCGGGGG | CCCTCCCGCG | GAGGCCCCGA | TGAGGACGGA | TTCCGCCGGC | CCGCCCGGGC  |            |            |
| Mus_musculus_NR_046233      | TCGCGGGGTT | CAAGTCGCTC | GTCGACCTCC | CCTCTCCGTT | CCTTCCATCT | CTCGGCAAT  | GGCGCCGCC  | GAGTTCACGG | TGGGTTCGTC | CTCCGCTCC  | GCTTCTCGCC  |            |            |
| Homo_sapiens_U13369         | CGGCGCGTCC | CCCGGGTGGC | CCTCGCTTCC | CGGGCCTGCC | GCGGCCCTTC | CCCGAGGCGT | CGTCCCGGG  | CGTCGCGGTC | GGGGAGAGCC | CGTCTCCCC  | GCGTGGCGTC  |            |            |
| Rattus_norvegicus_NR_046239 | -----      | -----      | -----      | -----      | -----      | -----      | -----      | -----      | -----      | -----      | -----       | -----      | -----      |
| Gallus_gallus_KT445934.2    | CGTGGCCTCG | CGGTGCCGAC | TCGTCTGTTC | GCCCCCCTG  | TCGGTGCCCC | AGGGCTCGCC | CGACCGAATC | CAGCTGTGTG | ACGGCCGAGC | GGCCCCGCGA | GCCGACGGCG  |            |            |
|                             | 3333333333 | 3333333333 | 3333333333 | 3333333333 | 3333333333 | 3333333333 | 3333333333 | 3333333333 | 3333333333 | 3333333333 | 3333333333  | 3333333333 | 3333333333 |
|                             | 1111111112 | 2222222222 | 2222222222 | 2222222222 | 2222222222 | 2222222222 | 2222222222 | 2222222222 | 2222222222 | 2222222222 | 2222222222  | 2222222222 | 2222222223 |
|                             | 9999999990 | 0000000001 | 1111111112 | 2222222223 | 3333333334 | 4444444445 | 5555555556 | 6666666667 | 7777777778 | 8888888889 | 9999999990  | 0000000001 | 1111111112 |
|                             | 1234567890 | 1234567890 | 1234567890 | 1234567890 | 1234567890 | 1234567890 | 1234567890 | 1234567890 | 1234567890 | 1234567890 | 1234567890  | 1234567890 | 1234567890 |
| Crocodylus_porosus_EU727191 | -----      | -----      | -----      | -----      | -----      | -----      | -----      | -----      | -----      | -----      | -----       | -----      | -----      |
| Xenopus_laevis_X02995       | CGGAGTTCGG | GGAGCCCGGG | GAGAGGAGCC | GGCGGCCCGG | CCTCTCGGGC | CCCCCGCAGC | ACGCCTCCAT | GCTACGCTTT | TTTGGCATGT | GCGGGCAGGA | AGGTAGGGGA  |            |            |
| Mus_musculus_NR_046233      | GGGGGCTGCG | CGCTGTCCGG | TCTCTCTGCG | CCGACCCCGG | TTGGCGTGGT | CTTCTCTGCG | CGGCTTCGCG | GACTCTGGCC | TTGCGCCCGA | GGGTACGGGG | GCTTCCCGGT  |            |            |

|                             |            |            |             |             |            |            |            |             |            |            |            |
|-----------------------------|------------|------------|-------------|-------------|------------|------------|------------|-------------|------------|------------|------------|
| Homo_sapiens_U13369         | GCCCCGTTTC | GCGCGCGCGT | GCGCCCCGAGC | GCGGCCCGGT  | GGTCCCTCCC | GGACAGGCGT | TCGTGCGACG | TGTGGCGTGG  | GTCGACCTCC | GCCTTGCCGG | TCGCTCGCCC |
| Rattus_norvegicus_NR_046239 | -----      | -----      | -----       | -----       | -----      | -----      | -----      | -----       | -----      | -----      | -----      |
| Gallus_gallus_KT445934.2    | TACCCATTTC | GTTGTGAGCG | AGGCGTCGGC  | GCTGCCCTCG  | TTTCGGGGCC | CGGCGAGTGC | CGGCCGCGAG | CAGCAAGCCG  | GCGGGGTGGC | AACCGAGGGA | AACCGCGGGG |
|                             | 3333333333 | 3333333333 | 3333333333  | 3333333333  | 3333333333 | 3333333333 | 3333333333 | 3333333333  | 3333333333 | 3333333333 | 3333333333 |
|                             | 3333333333 | 3333333333 | 3333333333  | 3333333333  | 3333333333 | 3333333333 | 3333333333 | 3333333333  | 3333333333 | 3333333334 | 4444444444 |
|                             | 0000000001 | 1111111112 | 2222222223  | 3333333334  | 4444444445 | 5555555556 | 6666666667 | 7777777778  | 8888888889 | 9999999990 | 0000000001 |
|                             | 1234567890 | 1234567890 | 1234567890  | 1234567890  | 1234567890 | 1234567890 | 1234567890 | 1234567890  | 1234567890 | 1234567890 | 1234567890 |
| Crocodylus_porosus_EU727191 | -----      | -----      | -----       | -----       | -----      | -----      | -----      | -----       | -----      | -----      | -----      |
| Xenopus_laevis_X02995       | AGACCGGCC  | TCGGCGCGAC | GGGCGCCCGA  | AAAAAGGACC  | GGGCGTTTC  | CCGCCTCGGT | CCCCGGTCTG | GGAAGGCTCC  | GCGGTCGAGT | CTCGCTCCCC | GGCCCGATCG |
| Mus_musculus_NR_046233      | TCCCCGACGT | TGCGCCTCGC | TGCTGTGTGC  | TTGGGGGGGG  | CCCGCTGCGG | CCTCCGCCCG | CCCGTGAGCC | CCTGCCGCAC  | CCGCCGGTGT | GCGGTTTCGC | GCCCGGGTCA |
| Homo_sapiens_U13369         | TCTCCCCGGG | TCGGGGGGTG | GGGCCCGGGC  | CGGGGCTCG   | GCCCCGGTTC | CTGCCTCCCG | TCCCCGGCGG | GGGCGGGCGC  | GCCGCCCGGC | CTCGGTTCGC | CTCCCTTGGC |
| Rattus_norvegicus_NR_046239 | -----      | -----      | -----       | -----       | -----      | -----      | -----      | -----       | -----      | -----      | -----      |
| Gallus_gallus_KT445934.2    | AACCGAGGCG | AAGCGAGCAG | CAGCAGAAGA  | AGGAACGAGA  | AGACAACGGG | GGGCTGCGCC | CGGCCGAGCG | GGCAGCCCG   | GAGCAGCGCG | GCGGTCCCG  | CTCCGGATCC |
|                             | 3333333333 | 3333333333 | 3333333333  | 3333333333  | 3333333333 | 3333333333 | 3333333333 | 3333333333  | 3333333333 | 3333333333 | 3333333333 |
|                             | 4444444444 | 4444444444 | 4444444444  | 4444444444  | 4444444444 | 4444444444 | 4444444444 | 4444444444  | 4444444444 | 5555555555 | 5555555555 |
|                             | 1111111112 | 2222222223 | 3333333334  | 4444444445  | 5555555556 | 6666666667 | 7777777778 | 8888888889  | 9999999990 | 0000000001 | 1111111112 |
|                             | 1234567890 | 1234567890 | 1234567890  | 1234567890  | 1234567890 | 1234567890 | 1234567890 | 1234567890  | 1234567890 | 1234567890 | 1234567890 |
| Crocodylus_porosus_EU727191 | -----      | -----      | -----       | -----       | -----      | -----      | -----      | -----       | -----      | -----      | -----      |
| Xenopus_laevis_X02995       | ATCTGGCAAC | CCGCGCCCGG | GCGGGGAGGG  | CCCTCTGCC   | GGCCGACCCC | CCGGCGGGGC | GGCCGCTACA | CGGGCAGGGA  | GGCTCCCTCC | CGCCTCGCCC | CGGGCGCGAC |
| Mus_musculus_NR_046233      | GTTCGGCCCT | GGCGTTGTGT | GCGCTCGGGA  | GCGTGTCCCG  | CTCGCGCGGG | CTAGACGCGG | TGTCGCGCGG | GCTCCGACGG  | GTGGCCTATC | CAGGGCTCGC | CCCCGCCGAC |
| Homo_sapiens_U13369         | CGTCGTGTGG | CGTGTGCCAC | CCCTGCGCCG  | GCGCCCGCCG  | GCGGGGCTCG | GAGCCGGGCT | TCGGCCGGCG | CCC GGGCCCT | CGACCGGACC | GGCTGCGCGG | GCCTGCGGGC |
| Rattus_norvegicus_NR_046239 | -----      | -----      | -----       | -----       | -----      | -----      | -----      | -----       | -----      | -----      | -----      |
| Gallus_gallus_KT445934.2    | GTCGGGGTGT | GGGGGCCGGG | GGCGTCCGCC  | GGCCTCTCCT  | CCGCTTCCG  | GCCGCCGAG  | CCCGTGTCCG | TTTTCTGTC   | GCGTCCCCCG | CCGTGCGGGA | GCGTGCCGCC |
|                             | 3333333333 | 3333333333 | 3333333333  | 3333333333  | 3333333333 | 3333333333 | 3333333333 | 3333333333  | 3333333333 | 3333333333 | 3333333333 |
|                             | 5555555555 | 5555555555 | 5555555555  | 5555555555  | 5555555555 | 5555555555 | 5555555555 | 5555555555  | 6666666666 | 6666666666 | 6666666666 |
|                             | 2222222223 | 3333333334 | 4444444445  | 5555555556  | 6666666667 | 7777777778 | 8888888889 | 9999999990  | 0000000001 | 1111111112 | 2222222223 |
|                             | 1234567890 | 1234567890 | 1234567890  | 1234567890  | 1234567890 | 1234567890 | 1234567890 | 1234567890  | 1234567890 | 1234567890 | 1234567890 |
| Crocodylus_porosus_EU727191 | -----      | -----      | -----       | -----       | -----      | -----      | -----      | -----       | -----      | -----      | -----      |
| Xenopus_laevis_X02995       | CCCCGGACCC | CCCCCGGTC  | CGGTCCCGCG  | CCGGGCCAC   | CCCCCGGCC  | GCCCCGGCGG | CCGGGGGGCG | CCCGCGCCCC  | CCCCGTGAGT | TCCCCCGCA  | CCGTCCGACC |
| Mus_musculus_NR_046233      | CCCCGCCTGC | CGTCCCGGT  | GGTGGTGTGT  | GGTGTGGGGA  | GTGAATGGTG | CTACCGGTCA | TTCCCTCCCG | CGTGGTTTGA  | CTGTCTCGCC | GGTGTCCGCG | TTCTCTTTCC |
| Homo_sapiens_U13369         | CGCACGGCCG | GACTGTCCCC | GGGCGGGGCA  | CCGCGGTCCG  | CCTCTCGTCT | GCCCGCCGGA | CGTGGGGGCG | GCCCCGCGGG  | GCGGGCGGAG | CGCCGTCCCC | GCCTCGCCCG |
| Rattus_norvegicus_NR_046239 | -----      | -----      | -----       | -----       | -----      | -----      | -----      | -----       | -----      | -----      | -----      |
| Gallus_gallus_KT445934.2    | CCGGGAAAGG | GTCTCCGATC | GTGGGGTTCG  | GCCCCGTTCG  | AGGTGCGGTT | CTCCTCTAGC | ACGTCCGTCT | CCGGCGGGCG  | GGCTTCGTTT | CCCCGTCCGC | TTCTCCGCGG |
|                             | 3333333333 | 3333333333 | 3333333333  | 3333333333  | 3333333333 | 3333333333 | 3333333333 | 3333333333  | 3333333333 | 3333333333 | 3333333333 |
|                             | 6666666666 | 6666666666 | 6666666666  | 6666666666  | 6666666666 | 6666666666 | 6666666666 | 6666666667  | 7777777777 | 7777777777 | 7777777777 |
|                             | 3333333334 | 4444444445 | 5555555556  | 6666666667  | 7777777778 | 8888888889 | 9999999990 | 0000000001  | 1111111112 | 2222222223 | 3333333334 |
|                             | 1234567890 | 1234567890 | 1234567890  | 1234567890  | 1234567890 | 1234567890 | 1234567890 | 1234567890  | 1234567890 | 1234567890 | 1234567890 |
| Crocodylus_porosus_EU727191 | -----      | -----      | -----       | -----       | -----      | -----      | -----      | -----       | -----      | -----      | -----      |
| Xenopus_laevis_X02995       | CCGGCAGGCG | CCGAAGAAG  | GCCCGACAG   | GCGGGGAGCC  | CGCCCCGGGG | GACCCCGTT  | CCCCCGCCG  | CGGACTCTCT  | TCCCTGGCC  | CGGGCCGAGC | ACCCCGTTTC |
| Mus_musculus_NR_046233      | GCCAACCCCC | ACGCCAACCC | ACCACCTGCG  | TCTCCCGGCC  | CGGTGCGGTC | GACGTTCCGG | CTCTCCCGAT | GCCGAGGGGT  | TCGGGATTTG | TGCCGGGGAC | GGAGGGGAGA |
| Homo_sapiens_U13369         | CGCCCGCGGG | CGCCGGCCCG | GCGCGCGCGC  | GCGTGGCCCG  | CGGTCCCTCC | CGGCCGCCCG | GCGCGGGTCG | GGCCGTCCCG  | CTCCTCGCGG | GCGGGCGCGA | GGAAGAAGCG |
| Rattus_norvegicus_NR_046239 | -----      | -----      | -----       | -----       | -----      | -----      | -----      | -----       | -----      | -----      | -----      |
| Gallus_gallus_KT445934.2    | GTCCCGGAGG | GCGGGTCAGC | CCCGGCCGGC  | CGTGC GGCGC | GAGCGCGAGT | CCGGCTCCCG | CGGGGGGGGC | CCGAGCGTGC  | CCGCCGAAAG | CAGCTGCGCA | GCGGTCCCCG |
|                             | 3333333333 | 3333333333 | 3333333333  | 3333333333  | 3333333333 | 3333333333 | 3333333333 | 3333333333  | 3333333333 | 3333333333 | 3333333333 |
|                             | 7777777777 | 7777777777 | 7777777777  | 7777777777  | 7777777777 | 7777777777 | 7777777777 | 7777777777  | 7777777777 | 7777777777 | 7777777777 |
|                             | 4444444445 | 5555555556 | 6666666667  | 7777777778  | 8888888889 | 9999999990 | 0000000001 | 1111111112  | 2222222223 | 3333333334 | 4444444445 |
|                             | 1234567890 | 1234567890 | 1234567890  | 1234567890  | 1234567890 | 1234567890 | 1234567890 | 1234567890  | 1234567890 | 1234567890 | 1234567890 |
| Crocodylus_porosus_EU727191 | -----      | -----      | -----       | -----       | ---        | AAAAGCG    | GCCCGGGTGC | CTGCCCTTC   | CTTCCCGCT  | GTCCTTCCCC | ATGCTGCTGC |
| Xenopus_laevis_X02995       | GCCCGACACC | CGCAGAGCGA | GAGAGAAAGA  | CGGAAAGAAA  | GGAGAGTAGG | CCGCGGGCCC | CGTCCCGGCC | GCCGCCTCCC  | CCCCCCTCC  | CCGGGGGGGG | GGAGCGGCAG |

|                             |            |            |            |             |            |            |             |            |            |            |             |
|-----------------------------|------------|------------|------------|-------------|------------|------------|-------------|------------|------------|------------|-------------|
| Mus_musculus_NR_046233      | GCGGGTAAGA | GAGGTGTCCG | AGAGCTGTCC | CGGGGCGACG  | CTCGGGTTGG | CTTTGCCCGC | TGCGTGTGCT  | CGCGGACGGG | TTTTGTCCGA | CCCCACGGG  | GTCGGTCCGG  |
| Homo_sapiens_U13369         | TCGCGGGTCT | GTGGCGCGGG | GCCCCCGGTG | GTCGTGTCCG  | GTGGGGGGCG | GGTGGTTGGG | GCCTCCGGTT  | CGCCCGCGCC | CGCCCCGGCC | CCACCGGTCC | CGGCCCGCGC  |
| Rattus_norvegicus_NR_046239 | -----      | -----      | -----      | -----       | -----      | -----      | -----       | -----      | -----      | -----      | -----       |
| Gallus_gallus_KT445934.2    | CTCCTTCCCC | GCGGGGGGGA | GGTCGGCGGG | GCCGCCCCGG  | GGATCGGGCG | CGCCTCTCCG | TCGTGGTCCG  | CGAGCGAGCG | AGCGAGCGAG | GGAACGACGG | AGGGCCGCCC  |
|                             | 3333333333 | 3333333333 | 3333333333 | 3333333333  | 3333333333 | 3333333333 | 3333333333  | 3333333333 | 3333333333 | 3333333333 | 3333333333  |
|                             | 8888888888 | 8888888888 | 8888888888 | 8888888888  | 8888888888 | 9999999999 | 9999999999  | 9999999999 | 9999999999 | 9999999999 | 9999999999  |
|                             | 5555555556 | 6666666667 | 7777777778 | 8888888889  | 9999999990 | 0000000001 | 1111111112  | 2222222223 | 3333333334 | 4444444445 | 5555555556  |
|                             | 1234567890 | 1234567890 | 1234567890 | 1234567890  | 1234567890 | 1234567890 | 1234567890  | 1234567890 | 1234567890 | 1234567890 | 1234567890  |
| Crocodylus_porosus_EU727191 | CCGCACCTTC | CCTGGCCCGG | GGAAAAGGGG | CCTATGGGAC  | CACCGAGGGG | CGGGGGGCTG | CGGCGAGGAA  | AGTCGCTGGC | CCTTGCCTGG | GGGCCAGTGG | GCGCCTGTCC  |
| Xenopus_laevis_X02995       | GCCGGGCGGG | GCCCCCGGCC | CGGACGGGAG | GGCCCCGGCG  | CCGGGAGCGC | CGCCGAGGGG | ACGGGCCCGG  | GTGACGCCTC | AGGGCGCCGA | CCCCGCCGCC | CCCCCCCCCG  |
| Mus_musculus_NR_046233      | CCGCATGCAC | TCFCCCGTTC | CGCGCGAGCG | CCCCGCCCGC  | TCACCCCCGG | TTTGTCTCTC | CGCGAGGCTC  | TCCGCCCGCG | CCGCCTCCTC | CTCCTCTCTC | GCGCTCTCTG  |
| Homo_sapiens_U13369         | CCCCCGCGCC | GCTCGCTCCC | TCCCGTCCCG | CCGTCCCGGG  | CCCGTCCGTC | CGTCCGTCGG | TCGTCTCTCT  | CGCTTGCGGG | GCGCCGGGGC | CGTCTCTCGG | AGGCCCCCCG  |
| Rattus_norvegicus_NR_046239 | -----      | -----      | -----      | -----       | -----      | -----      | -----       | -----      | -----      | -----      | -----       |
| Gallus_gallus_KT445934.2    | GCCCCGCCGA | GAGGCGTTCG | CCCCGGCGGC | CGCCGCCGTC  | GACCCGGCAA | GGGCCAGACG | GGAAAGCCGA  | GCGAGCAGGC | GAGAGAGAGA | GAGAGGGAAG | GAGCGAGAGC  |
|                             | 3333333333 | 3333333333 | 3333333333 | 3333333334  | 4444444444 | 4444444444 | 4444444444  | 4444444444 | 4444444444 | 4444444444 | 4444444444  |
|                             | 9999999999 | 9999999999 | 9999999999 | 9999999990  | 0000000000 | 0000000000 | 0000000000  | 0000000000 | 0000000000 | 0000000000 | 0000000000  |
|                             | 6666666667 | 7777777778 | 8888888889 | 9999999990  | 0000000001 | 1111111112 | 2222222223  | 3333333334 | 4444444445 | 5555555556 | 6666666667  |
|                             | 1234567890 | 1234567890 | 1234567890 | 1234567890  | 1234567890 | 1234567890 | 1234567890  | 1234567890 | 1234567890 | 1234567890 | 1234567890  |
| Crocodylus_porosus_EU727191 | GTGAGGCTAC | CCCTTGCCCC | ACTCTCCCTC | ACCCAAGGAG  | CATGGC---T | TCCTGGTTGA | TCCTGCCAGT  | AGCATATGCT | TGTCTCAAAG | ATTAAGCCAT | GAATGTCTAA  |
| Xenopus_laevis_X02995       | GCCGCCCCCG | GCGCCGCCCG | CCCCGCCCGG | CCCGGGGAAA  | GGTGGC---T | ACCTGGTTGA | TCCTGCCAGT  | AGCATATGCT | TGTCTCAAAG | ATTAAGCCAT | GCAGGTGTAA  |
| Mus_musculus_NR_046233      | TCCCGCCTGG | TCCTGTCCCA | CCCCGACGCG | TCCGCTCGCG  | CTTCC---T  | ACCTGGTTGA | TCCCTGCCAGT | AGCATATGCT | TGTCTCAAAG | ATTAAGCCAT | GCATGTCTAA  |
| Homo_sapiens_U13369         | GCCGGCCGTC | CGGCCGCGTC | GGGGGCTCGC | CGCGCTCTAC  | CTTACC---T | ACCTGGTTGA | TCCTGCCAGT  | AGCATATGCT | TGTCTCAAAG | ATTAAGCCAT | GCATGTCTAA  |
| Rattus_norvegicus_NR_046239 | -----      | -----      | -----      | -----       | -----      | -----      | -----       | -----      | -----      | -----      | -----       |
| Gallus_gallus_KT445934.2    | GGTCGGCGGC | GGGCCGGGCC | CGTCGGGTCG | TGCCCCGTGG  | CGCGGC---T | ACCTGGTTGA | TCCTGCCAGT  | AGCATATGCT | TGTCTCAAAG | ATTAAGCCAT | GCATGTCTAA  |
|                             | 4444444444 | 4444444444 | 4444444444 | 4444444444  | 4444444444 | 4444444444 | 4444444444  | 4444444444 | 4444444444 | 4444444444 | 4444444444  |
|                             | 0000000000 | 0000000000 | 0000000001 | 1111111111  | 1111111111 | 1111111111 | 1111111111  | 1111111111 | 1111111111 | 1111111111 | 1111111111  |
|                             | 7777777778 | 8888888889 | 9999999990 | 0000000001  | 1111111112 | 2222222223 | 3333333334  | 4444444445 | 5555555556 | 6666666667 | 7777777778  |
|                             | 1234567890 | 1234567890 | 1234567890 | 1234567890  | 1234567890 | 1234567890 | 1234567890  | 1234567890 | 1234567890 | 1234567890 | 1234567890  |
| Crocodylus_porosus_EU727191 | ATACACATGG | CCAGTACAGT | GAAACTGCGA | ATGGCTCATT  | AAATCAGTTA | TGGTTCCTTT | GGTCGCTC--  | -CAACCGTTA | CTTGGATAAC | TGTGGTAATT | CTAGAGCAAA  |
| Xenopus_laevis_X02995       | GTACGCACGG | CCGGTACAGT | GAAACTGCGA | ATGGCTCATT  | AAATCAGTTA | TGGTTCCTTT | GATCGCTC--  | -CATCTGTTA | CTTGGATAAC | TGTGGTAATT | CTAGAGCTAA  |
| Mus_musculus_NR_046233      | GTACGCACGG | CCGGTACAGT | GAAACTGCGA | ATGGCTCATT  | AAATCAGTTA | TGGTTCCTTT | GGTCGCTCGC  | TCCTCTCCTA | CTTGGATAAC | TGTGGTAATT | CTAGAGCTAA  |
| Homo_sapiens_U13369         | GTACGCACGG | CCGGTACAGT | GAAACTGCGA | ATGGCTCATT  | AAATCAGTTA | TGGTTCCTTT | GGTCGCTCGC  | TCCTCTCCTA | CTTGGATAAC | TGTGGTAATT | CTAGAGCTAA  |
| Rattus_norvegicus_NR_046239 | GTACGCACGG | CCGGTACAGT | GAAACTGCGA | ATGGCTCATT  | AAATCAGTTA | TGGTTCCTTT | GGTCGCTCGC  | TCCTCTCCTA | CTTGGATAAC | TGTGGTAATT | CTAGAGCTAA  |
| Gallus_gallus_KT445934.2    | GTACACACGG | GCGGTACAGT | GAAACTGCGA | ATGGCTCATT  | AAATCAGTTA | TGGTTCCTTT | GGTCGCTC-C  | CCTCCCGTTA | CTTGGATAAC | TGTGGTAATT | CTAGAGCTAA  |
|                             | 4444444444 | 4444444444 | 4444444444 | 4444444444  | 4444444444 | 4444444444 | 4444444444  | 4444444444 | 4444444444 | 4444444444 | 4444444444  |
|                             | 1111111111 | 1111111112 | 2222222222 | 2222222222  | 2222222222 | 2222222222 | 2222222222  | 2222222222 | 2222222222 | 2222222222 | 2222222222  |
|                             | 8888888889 | 9999999990 | 0000000001 | 1111111112  | 2222222223 | 3333333334 | 4444444445  | 5555555556 | 6666666667 | 7777777778 | 8888888889  |
|                             | 1234567890 | 1234567890 | 1234567890 | 1234567890  | 1234567890 | 1234567890 | 1234567890  | 1234567890 | 1234567890 | 1234567890 | 1234567890  |
| Crocodylus_porosus_EU727191 | TACATGCTGA | TGAGTGCTGA | CCTCT----- | -----GGGG   | ATGTGTGCAT | TTATCAGACC | AAAACCAACC  | CAG---GTTT | AC-----    | -----      | -----CC     |
| Xenopus_laevis_X02995       | TACATGCCGA | CGAGCGCTGA | CCCC-----  | -----AGGG   | ATGCGTGCAT | TTATCAGACC | AAAACCAATC  | CGG---GGCC | CC-----    | -----      | -----GCGCCC |
| Mus_musculus_NR_046233      | TACATGCCGA | CGGGCGCTGA | CCCCCTTCC  | CG-GGGGGG   | ATGCGTGCAT | TTATCAGATC | AAAACCAACC  | CGGTGAGCTC | CCTCCCGGCT | CCGGCCGGGG | GTCGGGCGCC  |
| Homo_sapiens_U13369         | TACATGCCGA | CGGGCGCTGA | CCCCCTTCCG | ---GGGGGG   | ATGCGTGCAT | TTATCAGATC | AAAACCAACC  | CGGTGAGCCC | CTCTCCGGCC | CCGGCCGGGG | GCGGGGCGCC  |
| Rattus_norvegicus_NR_046239 | TACATGCCGA | CGGGCGCTGA | CCCCCTTCC  | CGTGGGGGGA  | ACGCGTGCAT | TTATCAGATC | AAAACCAACC  | CGGTGAGCCC | CCTCCCGGCT | CCGGCCGGGG | GTCGGGCGCC  |
| Gallus_gallus_KT445934.2    | TACATGCCGA | CGAGCGCCGA | CCTCC----- | -----GGGG   | ACGCGTGCAT | TTATCAGACC | AAAACCAACC  | CGG---GCTC | GC-----    | -----      | -----CC     |
|                             | 4444444444 | 4444444444 | 4444444444 | 4444444444  | 4444444444 | 4444444444 | 4444444444  | 4444444444 | 4444444444 | 4444444444 | 4444444444  |
|                             | 2222222223 | 3333333333 | 3333333333 | 3333333333  | 3333333333 | 3333333333 | 3333333333  | 3333333333 | 3333333333 | 3333333333 | 3333333334  |
|                             | 9999999999 | 0000000001 | 1111111112 | 2222222223  | 3333333334 | 4444444445 | 5555555556  | 6666666667 | 7777777778 | 8888888889 | 9999999990  |
|                             | 1234567890 | 1234567890 | 1234567890 | 1234567890  | 1234567890 | 1234567890 | 1234567890  | 1234567890 | 1234567890 | 1234567890 | 1234567890  |
| Crocodylus_porosus_EU727191 | GCTGGCTTTG | GTGACTCTAG | ATAACCTAGG | GCCAAATCGCA | TGCCCT-GT  | GGTGGTGATA | ATGCATTTGA  | ATGTCTGCGC | TATCAACTTT | CAGGGGTACT | TTCTGTGCTT  |



|                             |            |            |            |             |             |             |             |            |            |            |            |
|-----------------------------|------------|------------|------------|-------------|-------------|-------------|-------------|------------|------------|------------|------------|
| Xenopus_laevis_X02995       | GGCCGCTTTG | GTGACTCTAG | ATAACCTCGG | GCCGATCGCA  | CGTCCCC-GT  | GACGGCGACG  | ATACATTCGG  | ATGTCTGCC  | TATCAACTTT | CGATGGTACT | TTCTGCGCCT |
| Mus_musculus_NR_046233      | GGCGGCTT-G | GTGACTCTAG | ATAACCTCGG | GCCGATCGCA  | CGCCCCCGT   | GCGGGCGACG  | ACCCATTCTGA | ACGTCTGCC  | TATCAACTTT | CGATGGTAGT | CGCCGTGCCT |
| Homo_sapiens_U13369         | GGCGGCTTTG | GTGACTCTAG | ATAACCTCGG | GCCGATCGCA  | CGCCCCCGT   | GCGGGCGACG  | ACCCATTCTGA | ACGTCTGCC  | TATCAACTTT | CGATGGTAGT | CGCCGTGCCT |
| Rattus_norvegicus_NR_046239 | GGCGGCTTTG | GTGACTCTAG | ATAACCTCGG | GCCGATCGCA  | CGTCCCC-GT  | GCGGGCGACG  | ACCCATTCTGA | ACGTCTGCC  | TATCAACTTT | CGATGGTAGT | CGCCGTGCCT |
| Gallus_gallus_KT445934.2    | GGCGGCTTTG | GTGACTCTAG | ATAACCTCGA | GCCGATCGCA  | CGCCCC-GT   | GCGGGCGACG  | ACCCATTCTGA | ATGTCTGCC  | TATCAACTTT | CGATGGTACT | GTCTGTGCCT |
|                             | 4444444444 | 4444444444 | 4444444444 | 4444444444  | 4444444444  | 4444444444  | 4444444444  | 4444444444 | 4444444444 | 4444444444 | 4444444444 |
|                             | 4444444444 | 4444444444 | 4444444444 | 4444444444  | 4444444444  | 4444444444  | 4444444444  | 4444444444 | 4444444444 | 4444444444 | 5555555555 |
|                             | 0000000001 | 1111111112 | 2222222223 | 3333333334  | 4444444445  | 5555555556  | 6666666667  | 7777777778 | 8888888889 | 9999999990 | 0000000001 |
|                             | 1234567890 | 1234567890 | 1234567890 | 1234567890  | 1234567890  | 1234567890  | 1234567890  | 1234567890 | 1234567890 | 1234567890 | 1234567890 |
| Crocodylus_porosus_EU727191 | ACCATGGTGA | CCATGGGTAA | CAGGGAATCA | GGGTTTGCTT  | CCAGAGAGGG  | AGCCTGAGAA  | ATGGCTACCA  | CATCCAGCAG | GAAGGCAGCA | GGTGTGCAAA | TTACCCACTC |
| Xenopus_laevis_X02995       | ACCATGGTGA | CCACGGGTAA | CGGGGAATCA | GGGTTTCGATT | CCGAGAGAGGG | AGCCTGAGAA  | ACGGCTACCA  | CATCCA--AG | GAAGGCAGCA | GGCGCGCAAA | TTACCCACTC |
| Mus_musculus_NR_046233      | ACCATGGTGA | CCACGGGTGA | CGGGGAATCA | GGGTTTCGATT | CCGAGAGAGGG | AGCCTGAGAA  | ACGGCTACCA  | CATCCA--AG | GAAGGCAGCA | GGCGCGCAAA | TTACCCACTC |
| Homo_sapiens_U13369         | ACCATGGTGA | CCACGGGTGA | CGGGGAATCA | GGGTTTCGATT | CCGAGAGAGGG | AGCCTGAGAA  | ACGGCTACCA  | CATCCA--AG | GAAGGCAGCA | GGCGCGCAAA | TTACCCACTC |
| Rattus_norvegicus_NR_046239 | ACCATGGTGA | CCACGGGTGA | CGGGGAATCA | GGGTTTCGATT | CCGAGAGAGGG | AGCCTGAGAA  | ACGGCTACCA  | CATCCA--AG | GAAGGCAGCA | GGCGCGCAAA | TTACCCACTC |
| Gallus_gallus_KT445934.2    | ACCATGGTGA | CCACGGGTAA | CGGGGAATCA | GGGTTTCGATT | CCGAGAGAGGG | AGCCTGAGAA  | ACGGCTACCA  | CATCCA--AG | GAAGGCAGCA | GGCGCGCAAA | TTACCCACTC |
|                             | 4444444444 | 4444444444 | 4444444444 | 4444444444  | 4444444444  | 4444444444  | 4444444444  | 4444444444 | 4444444444 | 4444444444 | 4444444444 |
|                             | 5555555555 | 5555555555 | 5555555555 | 5555555555  | 5555555555  | 5555555555  | 5555555555  | 5555555555 | 5555555555 | 5555555555 | 6666666666 |
|                             | 1111111112 | 2222222223 | 3333333334 | 4444444445  | 5555555556  | 6666666667  | 7777777778  | 8888888889 | 9999999990 | 0000000001 | 1111111112 |
|                             | 1234567890 | 1234567890 | 1234567890 | 1234567890  | 1234567890  | 1234567890  | 1234567890  | 1234567890 | 1234567890 | 1234567890 | 1234567890 |
| Crocodylus_porosus_EU727191 | CTGACCCAGG | AAGGTAGTGA | AGAAAAATAA | CAATACAGGA  | CTCTTTGAG   | CCCTGTAAAT  | TGGAAGGAGT  | ACACTTTAAA | TCCTTTAATG | AGGATCTATT | GGAGGGCAAG |
| Xenopus_laevis_X02995       | CCGACCCGGG | GAGGTAGTGA | CGAAAAATAA | CAATACAGGA  | CTCTTTGAG   | GCCCTGTAAAT | TGGAATGAGT  | CCACTTTAAA | TCCTTTAACG | AGGATCTATT | GGAGGGCAAG |
| Mus_musculus_NR_046233      | CCGACCCGGG | GAGGTAGTGA | CGAAAAATAA | CAATACAGGA  | CTCTTTGAG   | GCCCTGTAAAT | TGGAATGAGT  | CCACTTTAAA | TCCTTTAACG | AGGATCTATT | GGAGGGCAAG |
| Homo_sapiens_U13369         | CCGACCCGGG | GAGGTAGTGA | CGAAAAATAA | CAATACAGGA  | CTCTTTGAG   | GCCCTGTAAAT | TGGAATGAGT  | CCACTTTAAA | TCCTTTAACG | AGGATCTATT | GGAGGGCAAG |
| Rattus_norvegicus_NR_046239 | CCGACCCGGG | GAGGTAGTGA | CGAAAAATAA | CAATACAGGA  | CTCTTTGAG   | GCCCTGTAAAT | TGGAATGAGT  | CCACTTTAAA | TCCTTTAACG | AGGATCTATT | GGAGGGCAAG |
| Gallus_gallus_KT445934.2    | CCGACCCGGG | GAGGTAGTGA | CGAAAAATAA | CAATACAGGA  | CTCTTTGAG   | GCCCTGTAAAT | TGGAATGAGT  | CCACTTTAAA | TCCTTTAACG | AGGATCTATT | GGAGGGCAAG |
|                             | 4444444444 | 4444444444 | 4444444444 | 4444444444  | 4444444444  | 4444444444  | 4444444444  | 4444444444 | 4444444444 | 4444444444 | 4444444444 |
|                             | 6666666666 | 6666666666 | 6666666666 | 6666666666  | 6666666666  | 6666666666  | 6666666666  | 6666666666 | 6666666666 | 6666666666 | 6666666666 |
|                             | 2222222223 | 3333333334 | 4444444445 | 5555555556  | 6666666667  | 7777777778  | 8888888889  | 9999999990 | 0000000001 | 1111111112 | 2222222223 |
|                             | 1234567890 | 1234567890 | 1234567890 | 1234567890  | 1234567890  | 1234567890  | 1234567890  | 1234567890 | 1234567890 | 1234567890 | 1234567890 |
| Crocodylus_porosus_EU727191 | TCTGGTGCCA | GCAGCCATGT | TAATTCAGC  | TCCAATAGCG  | TATATTAAG   | TTGCTGCAAT  | TAAAAAGCTC  | GTAGTTGGAT | CTTGGGATCG | AGCTGGCGGT | CCGCCCGGAG |
| Xenopus_laevis_X02995       | TCTGGTGCCA | GCAGCCCGCG | TAATTCAGC  | TCCAATAGCG  | TATATTAAG   | TTGCTGCAAT  | TAAAAAGCTC  | GTAGTTGGAT | CTTGGGATCG | AGCTGGCGGT | CCGCCCGGAG |
| Mus_musculus_NR_046233      | TCTGGTGCCA | GCAGCCCGCG | TAATTCAGC  | TCCAATAGCG  | TATATTAAG   | TTGCTGCAAT  | TAAAAAGCTC  | GTAGTTGGAT | CTTGGGATCG | AGCTGGCGGT | CCGCCCGGAG |
| Homo_sapiens_U13369         | TCTGGTGCCA | GCAGCCCGCG | TAATTCAGC  | TCCAATAGCG  | TATATTAAG   | TTGCTGCAAT  | TAAAAAGCTC  | GTAGTTGGAT | CTTGGGATCG | AGCTGGCGGT | CCGCCCGGAG |
| Rattus_norvegicus_NR_046239 | TCTGGTGCCA | GCAGCCCGCG | TAATTCAGC  | TCCAATAGCG  | TATATTAAG   | TTGCTGCAAT  | TAAAAAGCTC  | GTAGTTGGAT | CTTGGGATCG | AGCTGGCGGT | CCGCCCGGAG |
| Gallus_gallus_KT445934.2    | TCTGGTGCCA | GCAGCCCGCG | TAATTCAGC  | TCCAATAGCG  | TATATTAAG   | TTGCTGCAAT  | TAAAAAGCTC  | GTAGTTGGAT | CTTGGGATCG | AGCTGGCGGT | CCGCCCGGAG |
|                             | 4444444444 | 4444444444 | 4444444444 | 4444444444  | 4444444444  | 4444444444  | 4444444444  | 4444444444 | 4444444444 | 4444444444 | 4444444444 |
|                             | 7777777777 | 7777777777 | 7777777777 | 7777777777  | 7777777777  | 7777777777  | 7777777777  | 7777777777 | 7777777777 | 7777777777 | 7777777777 |
|                             | 3333333334 | 4444444445 | 5555555556 | 6666666667  | 7777777778  | 8888888889  | 9999999990  | 0000000001 | 1111111112 | 2222222223 | 3333333334 |
|                             | 1234567890 | 1234567890 | 1234567890 | 1234567890  | 1234567890  | 1234567890  | 1234567890  | 1234567890 | 1234567890 | 1234567890 | 1234567890 |
| Crocodylus_porosus_EU727191 | GCGAGC-TAC | CGCT--GTC  | CCAGCCCTG  | CCTCTCGGC   | CCTCCCTGAT  | GCTCTTAAT   | GAGTGTCCC   | -GGGGCCCGA | AGCGTTTACT | TTGAAAAAAT | TAGAGTGTTC |
| Xenopus_laevis_X02995       | GCGGCT--AC | CGCT--GTC  | CCAGCCCTG  | CCTCTCGGC   | CCTCCCTGAT  | GCTCTTACT   | GAGTGTCCC   | -GGGGCCCGA | AGCGTTTACT | TTGAAAAAAT | TAGAGTGTTC |
| Mus_musculus_NR_046233      | GCGAGT-CAC | CGCC-GTCC  | CCGCCCTTG  | CCTCTCGGC   | CCCCCTCGAT  | GCTCTTAGCT  | GAGTGTCCC   | CGGGGCCCGA | AGCGTTTACT | TTGAAAAAAT | TAGAGTGTTC |
| Homo_sapiens_U13369         | GCGAGC-CAC | CGCC-GTCC  | CCGCCCTTG  | CCTCTCGGC   | CCCCCTCGAT  | GCTCTTAGCT  | GAGTGTCCC   | CGGGGCCCGA | AGCGTTTACT | TTGAAAAAAT | TAGAGTGTTC |
| Rattus_norvegicus_NR_046239 | GCGAGCTCAC | CGCCGTTC   | CCAGCCCTG  | CCTCTCGGC   | CCCCCTCGAT  | GCTCTTAGCT  | GAGTGTCCC   | CGGGGCCCGA | AGCGTTTACT | TTGAAAAAAT | TAGAGTGTTC |
| Gallus_gallus_KT445934.2    | GCGAGC-TAC | CGCT--GTC  | CCAGCCCTG  | TCTCTCGGC   | CCCCCTCGAT  | GCTCTTAAT   | GAGTGTCCC   | CGGGGCCCGA | AGCGTTTACT | TTGAAAAAAT | TAGAGTGTTC |

|                             |            |            |            |            |            |             |            |            |            |            |            |            |            |            |            |            |             |            |            |            |
|-----------------------------|------------|------------|------------|------------|------------|-------------|------------|------------|------------|------------|------------|------------|------------|------------|------------|------------|-------------|------------|------------|------------|
| Crocodylus_porosus_EU727191 | 4444444444 | 4444444444 | 4444444444 | 4444444444 | 4444444444 | 4444444444  | 4444444444 | 4444444444 | 4444444444 | 4444444444 | 4444444444 | 4444444444 | 4444444444 | 4444444444 | 4444444444 | 4444444444 | 4444444444  | 4444444444 | 4444444444 |            |
| Xenopus_laevis_X02995       | 8888888888 | 8888888888 | 8888888888 | 8888888888 | 8888888888 | 8888888888  | 8888888889 | 9999999999 | 9999999999 | 9999999999 | 9999999999 | 9999999999 | 9999999999 | 9999999999 | 9999999999 | 9999999999 | 9999999999  | 9999999999 | 9999999999 |            |
| Mus_musculus_NR_046233      | 4444444445 | 5555555556 | 6666666667 | 7777777778 | 8888888889 | 9999999990  | 0000000001 | 1111111112 | 2222222223 | 3333333334 | 4444444445 | 5555555556 | 6666666667 | 7777777778 | 8888888889 | 9999999990 | 0000000001  | 1111111112 | 2222222223 |            |
| Homo_sapiens_U13369         | 1234567890 | 1234567890 | 1234567890 | 1234567890 | 1234567890 | 1234567890  | 1234567890 | 1234567890 | 1234567890 | 1234567890 | 1234567890 | 1234567890 | 1234567890 | 1234567890 | 1234567890 | 1234567890 | 1234567890  | 1234567890 | 1234567890 |            |
| Rattus_norvegicus_NR_046239 | AAAGCAGGCC | --GGTCGCGC | GAATACTCCA | GCTAGGAATA | ATGGAATAGG | ACTCCCGTTC  | TATTTTGTGG | GTTTTCGGAA | CTGGGCCCAT | GATTAAGAGG | GACGGCCGGG | CAAGCAGGCC | -GCGTCGCT  | GGATACTCCA | GCTAGGAATA | ATGGAATAGG | ACTCCCGTTC  | TATTTTGTGG | GTTTTCGGAA | CTGGGCCCAT |
| Gallus_gallus_KT445934.2    | AAAGCAGGCC | CGAGCCGCT  | GGATACTCCA | GCTAGGAATA | ATGGAATAGG | ACC CGCGTTC | TATTTTGTGG | GTTTTCGGAA | CTGAGCCAT  | GATTAAGAGG | GACGGCCGGG | AAAGCAGGCC | CGAGCCGCT  | GGATACTCCA | GCTAGGAATA | ATGGAATAGG | ACC CGCGTTC | TATTTTGTGG | GTTTTCGGAA | CTGAGCCAT  |

|                             |             |            |            |            |            |            |            |            |            |            |            |             |            |            |            |            |            |            |            |           |
|-----------------------------|-------------|------------|------------|------------|------------|------------|------------|------------|------------|------------|------------|-------------|------------|------------|------------|------------|------------|------------|------------|-----------|
| Crocodylus_porosus_EU727191 | 4444444444  | 4444444444 | 4444444444 | 4444444444 | 4444444444 | 5555555555 | 5555555555 | 5555555555 | 5555555555 | 5555555555 | 5555555555 | 5555555555  | 5555555555 | 5555555555 | 5555555555 | 5555555555 | 5555555555 | 5555555555 | 5555555555 |           |
| Xenopus_laevis_X02995       | 9999999999  | 9999999999 | 9999999999 | 9999999999 | 9999999999 | 0000000000 | 0000000000 | 0000000000 | 0000000000 | 0000000000 | 0000000000 | 0000000000  | 0000000000 | 0000000000 | 0000000000 | 0000000000 | 0000000000 | 0000000000 | 0000000000 |           |
| Mus_musculus_NR_046233      | 5555555556  | 6666666667 | 7777777778 | 8888888889 | 9999999990 | 0000000001 | 1111111112 | 2222222223 | 3333333334 | 4444444445 | 5555555556 | 6666666667  | 7777777778 | 8888888889 | 9999999990 | 0000000001 | 1111111112 | 2222222223 | 3333333334 |           |
| Homo_sapiens_U13369         | 1234567890  | 1234567890 | 1234567890 | 1234567890 | 1234567890 | 1234567890 | 1234567890 | 1234567890 | 1234567890 | 1234567890 | 1234567890 | 1234567890  | 1234567890 | 1234567890 | 1234567890 | 1234567890 | 1234567890 | 1234567890 | 1234567890 |           |
| Rattus_norvegicus_NR_046239 | GGCATTTCGTA | TTGTGCCGCT | AGAGGTGAAA | TTCTTGACC  | GGCGCAAGAC | GGACCAAAGC | GAAAGCATTT | GCCAAGAATG | TTTTCATTA  | TCAAGAACGA | AAGTCGGAGG | GGCATTTCGTA | TTGTGCCGCT | AGAGGTGAAA | TTCTTGACC  | GGCGCAAGAC | GGACCAAAGC | GAAAGCATTT | GCCAAGAATG | TTTTCATTA |
| Gallus_gallus_KT445934.2    | GGCATTTCGTA | TTGTGCCGCT | AGAGGTGAAA | TTCTTGACC  | GGCGCAAGAC | GGACCAAAGC | GAAAGCATTT | GCCAAGAATG | TTTTCATTA  | TCAAGAACGA | AAGTCGGAGG | GGCATTTCGTA | TTGTGCCGCT | AGAGGTGAAA | TTCTTGACC  | GGCGCAAGAC | GGACCAAAGC | GAAAGCATTT | GCCAAGAATG | TTTTCATTA |

|                             |            |            |            |            |            |            |            |            |            |            |            |            |            |            |            |            |            |            |            |            |
|-----------------------------|------------|------------|------------|------------|------------|------------|------------|------------|------------|------------|------------|------------|------------|------------|------------|------------|------------|------------|------------|------------|
| Crocodylus_porosus_EU727191 | 5555555555 | 5555555555 | 5555555555 | 5555555555 | 5555555555 | 5555555555 | 5555555555 | 5555555555 | 5555555555 | 5555555555 | 5555555555 | 5555555555 | 5555555555 | 5555555555 | 5555555555 | 5555555555 | 5555555555 | 5555555555 | 5555555555 |            |
| Xenopus_laevis_X02995       | 0000000000 | 0000000000 | 0000000000 | 0000000000 | 0000000001 | 1111111111 | 1111111111 | 1111111111 | 1111111111 | 1111111111 | 1111111111 | 1111111111 | 1111111111 | 1111111111 | 1111111111 | 1111111111 | 1111111111 | 1111111111 | 1111111111 |            |
| Mus_musculus_NR_046233      | 6666666667 | 7777777778 | 8888888889 | 9999999990 | 0000000001 | 1111111112 | 2222222223 | 3333333334 | 4444444445 | 5555555556 | 6666666667 | 7777777778 | 8888888889 | 9999999990 | 0000000001 | 1111111112 | 2222222223 | 3333333334 | 4444444445 |            |
| Homo_sapiens_U13369         | 1234567890 | 1234567890 | 1234567890 | 1234567890 | 1234567890 | 1234567890 | 1234567890 | 1234567890 | 1234567890 | 1234567890 | 1234567890 | 1234567890 | 1234567890 | 1234567890 | 1234567890 | 1234567890 | 1234567890 | 1234567890 | 1234567890 |            |
| Rattus_norvegicus_NR_046239 | TTCGAAGACG | ATCAGATACC | GTCGTAGTTC | CGACCATAAA | CGATGCCGAC | TAGCGATCCG | GCGGCCTTAT | TCCCATGACC | CGCCGGGCAG | CTTCCGGGAA | ACCAAAGTCT | TTCGAAGACG | ATCAGATACC | GTCGTAGTTC | CGACCATAAA | CGATGCCGAC | TAGCGATCCG | GCGGCCTTAT | TCCCATGACC | CGCCGGGCAG |
| Gallus_gallus_KT445934.2    | TTCGAAGACG | ATCAGATACC | GTCGTAGTTC | CGACCATAAA | CGATGCCGAC | TAGCGATCCG | GCGGCCTTAT | TCCCATGACC | CGCCGGGCAG | CTTCCGGGAA | ACCAAAGTCT | TTCGAAGACG | ATCAGATACC | GTCGTAGTTC | CGACCATAAA | CGATGCCGAC | TAGCGATCCG | GCGGCCTTAT | TCCCATGACC | CGCCGGGCAG |

|                             |            |            |            |            |            |            |            |            |            |            |            |            |            |            |            |            |            |            |            |            |
|-----------------------------|------------|------------|------------|------------|------------|------------|------------|------------|------------|------------|------------|------------|------------|------------|------------|------------|------------|------------|------------|------------|
| Crocodylus_porosus_EU727191 | 5555555555 | 5555555555 | 5555555555 | 5555555555 | 5555555555 | 5555555555 | 5555555555 | 5555555555 | 5555555555 | 5555555555 | 5555555555 | 5555555555 | 5555555555 | 5555555555 | 5555555555 | 5555555555 | 5555555555 | 5555555555 | 5555555555 |            |
| Xenopus_laevis_X02995       | 1111111111 | 1111111111 | 1111111112 | 2222222222 | 2222222222 | 2222222222 | 2222222222 | 2222222222 | 2222222222 | 2222222222 | 2222222222 | 2222222222 | 2222222222 | 2222222222 | 2222222222 | 2222222222 | 2222222222 | 2222222222 | 2222222222 |            |
| Mus_musculus_NR_046233      | 7777777778 | 8888888889 | 9999999990 | 0000000001 | 1111111112 | 2222222223 | 3333333334 | 4444444445 | 5555555556 | 6666666667 | 7777777778 | 8888888889 | 9999999990 | 0000000001 | 1111111112 | 2222222223 | 3333333334 | 4444444445 | 5555555556 |            |
| Homo_sapiens_U13369         | 1234567890 | 1234567890 | 1234567890 | 1234567890 | 1234567890 | 1234567890 | 1234567890 | 1234567890 | 1234567890 | 1234567890 | 1234567890 | 1234567890 | 1234567890 | 1234567890 | 1234567890 | 1234567890 | 1234567890 | 1234567890 | 1234567890 |            |
| Rattus_norvegicus_NR_046239 | CTGGGTTCCG | GGGGGAGTAT | GGTTGCAAAG | CTGAAACTTA | AAGGAATTGA | CGGAAGGGCA | CCACCAGGAG | TGGATCCTGC | GGCTTAATTT | GACTCAACAT | GGGATACTC  | CTGGGTTCCG | GGGGGAGTAT | GGTTGCAAAG | CTGAAACTTA | AAGGAATTGA | CGGAAGGGCA | CCACCAGGAG | TGGATCCTGC | GGCTTAATTT |
| Gallus_gallus_KT445934.2    | CTGGGTTCCG | GGGGGAGTAT | GGTTGCAAAG | CTGAAACTTA | AAGGAATTGA | CGGAAGGGCA | CCACCAGGAG | TGGATCCTGC | GGCTTAATTT | GACTCAACAT | GGGATACTC  | CTGGGTTCCG | GGGGGAGTAT | GGTTGCAAAG | CTGAAACTTA | AAGGAATTGA | CGGAAGGGCA | CCACCAGGAG | TGGATCCTGC | GGCTTAATTT |

|                             |            |            |            |            |            |            |            |            |            |            |            |            |            |            |            |            |            |            |            |            |
|-----------------------------|------------|------------|------------|------------|------------|------------|------------|------------|------------|------------|------------|------------|------------|------------|------------|------------|------------|------------|------------|------------|
| Crocodylus_porosus_EU727191 | 5555555555 | 5555555555 | 5555555555 | 5555555555 | 5555555555 | 5555555555 | 5555555555 | 5555555555 | 5555555555 | 5555555555 | 5555555555 | 5555555555 | 5555555555 | 5555555555 | 5555555555 | 5555555555 | 5555555555 | 5555555555 | 5555555555 |            |
| Xenopus_laevis_X02995       | 2222222222 | 2222222223 | 3333333333 | 3333333333 | 3333333333 | 3333333333 | 3333333333 | 3333333333 | 3333333333 | 3333333333 | 3333333333 | 3333333333 | 3333333333 | 3333333333 | 3333333333 | 3333333333 | 3333333333 | 3333333333 | 3333333333 |            |
| Mus_musculus_NR_046233      | 8888888889 | 9999999990 | 0000000001 | 1111111112 | 2222222223 | 3333333334 | 4444444445 | 5555555556 | 6666666667 | 7777777778 | 8888888889 | 9999999990 | 0000000001 | 1111111112 | 2222222223 | 3333333334 | 4444444445 | 5555555556 | 6666666667 |            |
| Homo_sapiens_U13369         | 1234567890 | 1234567890 | 1234567890 | 1234567890 | 1234567890 | 1234567890 | 1234567890 | 1234567890 | 1234567890 | 1234567890 | 1234567890 | 1234567890 | 1234567890 | 1234567890 | 1234567890 | 1234567890 | 1234567890 | 1234567890 | 1234567890 |            |
| Rattus_norvegicus_NR_046239 | ACCTGACCCG | GCCATGGAAA | GGATTG---  | -----      | -----      | -----      | -----      | ---GGGTG   | GTGGTGCATG | GCCGTCTTA  | GTTGGTGGAG | TGATTTGTCT | GGTTAATTT  | GACTCAACAT | GGGAAACCTC | ACCCGACCCG | GACACGGAAA | GGATTGACAG | ATTGATAGCT | CTTCTCGAT  |
| Gallus_gallus_KT445934.2    | ACCCGACCCG | GACACGGACA | GGATTGACAG | ATTGATAGCT | CTTCTCGAT  | TCCGTGGGTG | GTGGTGCATG | GCCGTCTTA  | GTTGGTGGAG | CGATTTGTCT | GGTTAATTT  | GACTCAACAT | GGGAAACCTC | ACCCGACCCG | GACACGGACA | GGATTGACAG | ATTGATAGCT | CTTCTCGAT  | TCCGTGGGTG | GTGGTGCATG |



Gallus\_gallus\_KT445934.2 CTAGAGGAAG TAAAAGTCGT AACAAAGTTT CCGTAGGTGA ACCTGCGGAA GGATCATTA- --CCGGGGCC GAGGCCGGC GTCCGGCCGA GCCGTGGCAC GAGCGCGGC  
555555555 555555555 555555555 555555555 555555555 555555555 666666666 666666666 666666666 666666666 666666666  
999999999 999999999 999999999 999999999 999999999 999999999 000000000 000000000 000000000 000000000 000000000  
444444444 555555555 666666666 777777777 888888888 999999999 000000001 111111112 222222223 333333334 444444445  
123456789 123456789 123456789 123456789 123456789 123456789 123456789 123456789 123456789 123456789 123456789  
Crocodylus\_porosus\_EU727191 CCATGCTCCC CCATCCCAT CTCTGGCAGC CTTGTGTGCA TGCATGCCCC GTGTGTCTGG GCTTCCAGGA CCTCATGCAG ACCAGTCTGT GGCTGCACAG CTCAGAGTGC  
Xenopus\_laevis\_X02995 CCCGCGGAGA GAGAGAGAGA CGCCCCCCCC GGAGCGGAGA CCGCCCCCCC CCACACGGGG GGGGGCGGCC GCCCCGAAA GGACGACGAG GAACCCCCAG ACGGCCCCGG  
Mus\_musculus\_NR\_046233 T-TGTGTGT C---CTCGC GGGAGGCGGC T-----GCG -----GCG TCCCGGGTCC CGTTCGCC- -CGCGTGTG AGCGAGGTGT CTGGAGTGTG GTGAGAGAAG  
Homo\_sapiens\_U13369 CTTCCCTCCG CACACCCACC CCCCACCCG GACGCGGCGC GTGCGCGGGC GTGGCCCGTG TTCGCTCCGT CCGTCCGTTCG CCGCCCGGCC CCGCCCGCCG  
Rattus\_norvegicus\_NR\_046239 GAGTGTTCCT CCTTCTCGCC GGGAGGCGCG TCCCCGGGTG GGTCCCGTGT TCCGCGTCC TGGCGTCTGT GCGCGTGCAG TGGCCGGCCC GCGGAGGGGG TTTCGGGACA  
Gallus\_gallus\_KT445934.2 GGGCGCGCAG CCTTCCCTTC CCTTCCCGCA GCCCGTCCG CGCGGAGCGC GGTTCCTCTC CCCCCTCTCA AACGGGAAA GAAAAAAA ACACCGCAAG TCCTCCCGC  
666666666 666666666 666666666 666666666 666666666 666666666 666666666 666666666 666666666 666666666 666666666  
000000000 000000000 000000000 000000000 000000001 111111111 111111111 111111111 111111111 111111111 111111111  
555555555 666666666 777777777 888888888 999999999 000000001 111111112 222222223 333333334 444444445 555555556  
123456789 123456789 123456789 123456789 123456789 123456789 123456789 123456789 123456789 123456789 123456789  
Crocodylus\_porosus\_EU727191 AGGACAGGTC CCCAGCCGT GGGGGGCCA GGTCTGAGT GGCTCCCTG 123456789 123456789 123456789 123456789 123456789 123456789  
Xenopus\_laevis\_X02995 CGAGGGGGCG GCGGCGGCC CGGGTCCACC CCGGGCCCG CCGCCCGCCT CCCCAGCGCG GCGCCGCCC GGTACTAGC CGGGCGGGG GCGCGGGGCG TGCGCGGGG  
Mus\_musculus\_NR\_046233 GG-----GT GGGTGGG-GT CGGTCTGGGT CCGTC-TGG ACCGCTCCG ATTTCCTCC CCTTCCCTC CTCCCTCGTC CGGTCTGTAG CTCGCCACC TACCGCGG-  
Homo\_sapiens\_U13369 GAGAGCCGAG AACTCGGGAG GGAGACGGGG GGGAGAGAGA GAGAGAGAGA GAGAGAGAGA GAGAGAGAGA GAGAAAGAAG GCGGTGTCTG TGGTGTGGCG GTGTCTGGG  
Rattus\_norvegicus\_NR\_046239 GGTGTGCGGT GGCAGGGTGT CGGGTCTGGT CCGCGCGGCG ACCTCTCCG TTTTCTCGT CTTCCAGTGA CGCTCCCGTG CG--CCCGC TCCCGCTCC -GCCCGCCG  
Gallus\_gallus\_KT445934.2 CGCCTGCCGT CGAGAGAGAA GGGAGACGAG GCGCGGAGC GCAGCTCCCG GGGGGGAGG CGGTGTGGG GCGCGCTCC GCGCGCTCTC TCCCCCGG  
666666666 666666666 666666666 666666666 666666666 666666666 666666666 666666666 666666666 666666666 666666666  
111111111 111111111 111111111 111111111 222222222 222222222 222222222 222222222 222222222 222222222 222222222  
666666666 777777777 888888888 999999999 000000001 111111112 222222223 333333334 444444445 555555556 666666667  
123456789 123456789 123456789 123456789 123456789 123456789 123456789 123456789 123456789 123456789 123456789  
Crocodylus\_porosus\_EU727191 AGGACTGGGG TCCTTGAGG GGCTCCTGCC CAGTGCCAGG GATTTTCTT CAGCAGCAT GTTCCATTC TGGCCACCC ACCCCGCCC GTGGCAGTGC CCTTTCCAC  
Xenopus\_laevis\_X02995 GCGGGGCGCG CCCAGGGCGC TCCGCGCTCC CCGCGTCCG CTCCCGCGC CCGCCCGGG CGGTTTGAAG ACCCCGCCC CCGGGCGGG GGAGGCCCG GAGGGAGCCG  
Mus\_musculus\_NR\_046233 GCGGGCTGCT CGCGGGTGT TCGCTCTTT CCGTCCGCG TC----TTC CGGTTTACG CGTCTTACG CGGTTTGTAC CCGTCCCGG CCGTCCCGGT  
Homo\_sapiens\_U13369 GCCGCGGGG GCGGGGAGC GGTCCCGGG CCGGGCCCG ACGACGTGG TGTCGGCGGG CCGGGGGGG GTTCTCGGC GCGTCCGGC GGGTCTGGGG GGTCTCGGT  
Rattus\_norvegicus\_NR\_046239 GTCGGCAGC- -GAGGGCGT CTGCCCTTT CCGGCGGGG TCCGTGATC CGTGTGCACC GGGGGTGGTA CGTGATCTC- -TCCGGGG GTGGCCGGGA CCGCTCGCT  
Gallus\_gallus\_KT445934.2 GCCGTCGGTC CGCACGCCG GGTCCCGTC CGTCCGGTGC CTTCCGCGG GCGCGCCC GCGCGCGGT CCGCGGGGC TCGCCGGGT CCGCGGCTC CGGAGCGTCC  
666666666 666666666 666666666 666666666 666666666 666666666 666666666 666666666 666666666 666666666 666666666  
222222222 222222222 222222223 333333333 333333333 333333333 333333333 333333333 333333333 333333333 333333333  
777777777 888888888 999999999 000000001 111111112 222222223 333333334 444444445 555555556 666666667 777777778  
123456789 123456789 123456789 123456789 123456789 123456789 123456789 123456789 123456789 123456789 123456789  
Crocodylus\_porosus\_EU727191 TCTCACATCT GTGTGCCCC AGCCTCCCT TGGGCGCAT GCCCAGCAG GCTGGTCA GGTCTGCGC CCTTCCCTG TGTCCCAGG TTCCACCCT GCCTCTCA  
Xenopus\_laevis\_X02995 GGGAGGGGAG GGGGGGAGG GCGGGCGAG CCGGCGGGG CGCGCCGGG GTCCCGTCC CCGCCGCCC CCGCGGCCG GGGGCGCCG GCGCGGAGC  
Mus\_musculus\_NR\_046233 CGTCGGGGCG CGCGCTTTG TCTCCCGGA CCCATCCCC CCGCGGCTCT GGCTTTTCTA CGTGGGTGG GCGGTTGTG CCGTGTGGG GGATGTG - -AGTGTGGG  
Homo\_sapiens\_U13369 GCCCTCTCC CGCGGGGGC CCGTCTCCG GCCGCGGGC GCGCGCTCC CGTCTCGGG CCGGCGGGG TTCCTCTCG CCGCTCCGCG CCGCTCCGGA  
Rattus\_norvegicus\_NR\_046239 CTCCTCAGG CGCTGCCG TCTCCCGCG CCGCGGCTCT CCG--GACT GACGGTGC- -CGGTGGTCC GCGCGTGGC GTGGGGGGG GTGTGTGTG CCGTCCCGC  
Gallus\_gallus\_KT445934.2 CCGGGCCGAG TCCCGTCCG ACCGCGGGT CGGGTCCGG AGGTGGCGG GGTGCGGAG GTGAAGGAC GGCTCCCGC TTCGTGCTC GGCCGAAAC TCGCACCCG  
666666666 666666666 666666666 666666666 666666666 666666666 666666666 666666666 666666666 666666666 666666666  
333333333 333333334 444444444 444444444 444444444 444444444 444444444 444444444 444444444 444444444 444444444  
888888888 999999999 000000001 111111112 222222223 333333334 444444445 555555556 666666667 777777778 888888889  
123456789 123456789 123456789 123456789 123456789 123456789 123456789 123456789 123456789 123456789 123456789  
Crocodylus\_porosus\_EU727191 GCCCAGCTGA GTGGGGGAG GAAAGGACT CAGGGTTGG CCGGTTGTC GGTCTGTCAG CACCACATG GCGGGGCATC CGTGGTGGCT GGGATGGCTG GGATGGGATG  
Xenopus\_laevis\_X02995 GCCTCAGCG CAGCAGCGG AGCCTTCCG AGACCGAAA GGA AAAACCG CACAGCGCTC GCAGCGCTC CG-----  
Mus\_musculus\_NR\_046233 TGTGGGCTCG CCGTCCCGA TGCCACGTT TTCTGGCCT CCGTGTCTC CCGCTCTCTG TCCCGGTC TTAGCTGTG CCGTCCCGG CCGAGGGTTA AGGACCCCG  
Homo\_sapiens\_U13369 CGGCCCCGCT CGCTCTCCC GGCCTTCCC TAGGGCGTC TCGAGGGTGC GGGCCGAGC GCGGTCCCC TCCCGCCT CCTCGTCCG CCGCGGCCG TCCAGGTACC

|                             |            |            |            |             |             |            |            |             |            |            |             |
|-----------------------------|------------|------------|------------|-------------|-------------|------------|------------|-------------|------------|------------|-------------|
| Rattus_norvegicus_NR_046239 | GGTGGGCTCG | CGCGCCCCG- | --CCGCGTCC | TTCTGGGCCCT | CCGTGTCCGC  | CCCCTCCTG  | TCC-GGGTAC | CT-GCTCTCG  | CGTTCGGCGG | CGGAGGTTTC | GCGACCCCGG  |
| Gallus_gallus_KT445934.2    | CCCCGCCGC  | TGTGCAGCCG | GGCACCCCGA | GTCCGCTCGG  | AGGGAAGCCG  | CGCGGGCGGC | CGCGCGCGGG | GGAGGCGGCG  | GGCGGCGGGT | CCGAGCGCGG | GGCGGGGAA   |
|                             | 6666666666 | 6666666666 | 6666666666 | 6666666666  | 6666666666  | 6666666666 | 6666666666 | 6666666666  | 6666666666 | 6666666666 | 6666666666  |
|                             | 4444444444 | 5555555555 | 5555555555 | 5555555555  | 5555555555  | 5555555555 | 5555555555 | 5555555555  | 5555555555 | 5555555555 | 5555555556  |
|                             | 9999999999 | 0000000001 | 1111111112 | 2222222223  | 3333333334  | 4444444445 | 5555555556 | 6666666667  | 7777777778 | 8888888889 | 9999999990  |
|                             | 1234567890 | 1234567890 | 1234567890 | 1234567890  | 1234567890  | 1234567890 | 1234567890 | 1234567890  | 1234567890 | 1234567890 | 1234567890  |
| Crocodylus_porosus_EU727191 | GGGAGGGCCC | GTCTGGCGGG | GCGGCCCCAG | CTGTGTCAGC  | CCCCAGGGAA  | ACAGCTAAGA | CCTGAGAGAA | ACCCAGCCCC  | CCCAAATGGG | AAGGCGCTGG | CCATGGCAGT  |
| Xenopus_laevis_X02995       | -----      | -----      | -----      | -----       | -----       | -----      | -----      | -----       | -----      | -----      | -----       |
| Mus_musculus_NR_046233      | GGGGGTCCGC | CTGCCGCCCC | CAGGGTCGGG | GGG-CGGTGG  | GGCCCGTAGG  | GAAGTCGGTC | GTTCGGG--- | -----       | -----      | -----CGGCT | CTCCCTCAGA  |
| Homo_sapiens_U13369         | TAGCGCGTTC | CGGCGCGGAG | GTTTAAAGAC | CCCTTGGGGG  | GATCGCCCGT  | CCGCCCGTGG | GTCGGGGGGC | GTGGTGGGCC  | CGCGGGGGAG | TCCCGTCCGG | AGGGGCCCGG  |
| Rattus_norvegicus_NR_046239 | GGGGGTCCGC | CTACCGTCCC | CGGGGTCCGG | GGGGCGGTGG  | GGCCCGTAGG  | GACGTCGGTC | GTCCGCGGGA | GGGCTTCCCG  | GTCCCTCCCC | GCGTCCGCGC | CTCCCTCAGA  |
| Gallus_gallus_KT445934.2    | GTCGGCCGCT | TCCCCGGCC  | TCACCCCCA  | CCCCCTTCGC  | CCGGCCCGTC  | GCGGGGACGG | GGCCGGGTCC | CGGGCGGTGG  | CGGAGCCGGC | CGACTCCGGG | CGAGCGCCGG  |
|                             | 6666666666 | 6666666666 | 6666666666 | 6666666666  | 6666666666  | 6666666666 | 6666666666 | 6666666666  | 6666666666 | 6666666666 | 6666666666  |
|                             | 6666666666 | 6666666666 | 6666666666 | 6666666666  | 6666666666  | 6666666666 | 6666666666 | 6666666666  | 6666666666 | 6666666666 | 6666666667  |
|                             | 0000000001 | 1111111112 | 2222222223 | 3333333334  | 4444444445  | 5555555556 | 6666666667 | 7777777778  | 8888888889 | 9999999990 | 0000000001  |
|                             | 1234567890 | 1234567890 | 1234567890 | 1234567890  | 1234567890  | 1234567890 | 1234567890 | 1234567890  | 1234567890 | 1234567890 | 1234567890  |
| Crocodylus_porosus_EU727191 | GAGTCCTGGG | CGCTGCCCTC | CGGGTGGATG | CTTCTCCCGG  | CCTATGGGTT  | CACAGAGCTG | GCTGGAGGAT | GCCAGGCTCA  | ACTCCACGTC | CCCTCCAGT  | GTCTGTCCCT  |
| Xenopus_laevis_X02995       | -----      | -----      | -----      | -----       | -----       | -----      | -----      | -----       | -----      | -----      | -----       |
| Mus_musculus_NR_046233      | CTCCATGACC | CTCCTCCCCC | CGTGCCGCC  | G-TTCCCCGAG | GCGGCGGTTCG | TGTGGGGGGG | TGGATGTCTG | GAGCCCCCTC  | -GGGCGCCGT | GGGGG--CCC | GACCCGCGCC  |
| Homo_sapiens_U13369         | CCCCTCCCGC | GCCTCCACCG | GCGACTCCGC | TCCCCGGCCG  | GGGCCGCGCC  | GCCGCGCGCC | CGCGCGGGCC | CGTCGGGTGG  | GGGCTTTACC | CGGCGCCCGT | GCCGCGCCTG  |
| Rattus_norvegicus_NR_046239 | CTCAGCGGCG | CACC--CCTC | TGCCGCGGCG | GCTTCCCGAG  | GCGGCGGTT-  | --CGGGGGG  | CG--TGTCGC | GAGCCCCCTC  | TGGGCGCCCG | AGGGGTTCC  | GGCCCGCAGC  |
| Gallus_gallus_KT445934.2    | AGGGACGCGC | GCGCCGCGTA | GCGCGGCGAG | GCGCGAGGTG  | CCCCGGGCGG  | CTTCGGTCCC | GCGCGGGCGG | TCCGAGCCTC  | GCGGCTCCTC | CCGGGTGCAG | CTGCCGCCCG  |
|                             | 6666666666 | 6666666666 | 6666666666 | 6666666666  | 6666666666  | 6666666666 | 6666666666 | 6666666666  | 6666666666 | 6666666666 | 6666666666  |
|                             | 7777777777 | 7777777777 | 7777777777 | 7777777777  | 7777777777  | 7777777777 | 7777777777 | 7777777777  | 7777777778 | 8888888888 | 8888888888  |
|                             | 1111111112 | 2222222223 | 3333333334 | 4444444445  | 5555555556  | 6666666667 | 7777777778 | 8888888889  | 9999999990 | 0000000001 | 1111111112  |
|                             | 1234567890 | 1234567890 | 1234567890 | 1234567890  | 1234567890  | 1234567890 | 1234567890 | 1234567890  | 1234567890 | 1234567890 | 1234567890  |
| Crocodylus_porosus_EU727191 | TGCTGTCCCA | TCTGCGGAGG | CGAGGCATTG | TCCGGAAGGT  | GGGGGTTGGG  | ACCACCTGGA | GTTCAGAACC | ATTTCCCTCA  | CCCAAGCTAC | CAGGTACCTA | GTGCTCCACC  |
| Xenopus_laevis_X02995       | -----      | -----      | -----      | -----       | -----       | -----      | -----      | -----       | -----      | -----      | -----       |
| Mus_musculus_NR_046233      | GCCGGCTTGC | CCGATT--TC | GCGGGTTCGG | TCCTGTCCGT  | GCCGG--TCG  | TGGGTTCCCG | TGTCGT---T | CCCCTGTTTT  | TCCGCTCCCG | ACCCT--TTT | TTTTTCTCCTC |
| Homo_sapiens_U13369         | CCGCGCGTGT | GGCGTGCGCC | CCGCGCCGTG | GGGGCGGGAA  | CCCCCGGGCG  | CCTGTGGGGT | GGTGTCCGCG | CTCGCCCCCG  | CGTGGGCGGC | GCGGCCTCC  | CCGTGGTGTG  |
| Rattus_norvegicus_NR_046239 | CCTGGCTTGT | CCCGCCCGTT | GGCGGGCCGC | CGCCG--GGT  | GCCGGGTTTCG | TGGCGTCCCG | TGTCCCGTGT | GTCCCGCCTT  | TCCGTCTCCG | ACCCTGTCTT | TTTTTTTTTTA |
| Gallus_gallus_KT445934.2    | GCGCCGGGTT | GCCGAGGGAA | ACCCTGGGCC | CCGGGAGGAA  | CGCGAGGTGG  | TGGCGGCGGA | CGTCGGGCGC | GCCCCGCGG   | GCGGACGCTC | CCCCGAGGGG | GCGCGGGGCC  |
|                             | 6666666666 | 6666666666 | 6666666666 | 6666666666  | 6666666666  | 6666666666 | 6666666666 | 6666666666  | 6666666666 | 6666666666 | 6666666666  |
|                             | 8888888888 | 8888888888 | 8888888888 | 8888888888  | 8888888888  | 8888888888 | 8888888888 | 8888888888  | 8888888889 | 9999999999 | 9999999999  |
|                             | 2222222223 | 3333333334 | 4444444445 | 5555555556  | 6666666667  | 7777777778 | 8888888889 | 9999999990  | 0000000001 | 1111111112 | 2222222223  |
|                             | 1234567890 | 1234567890 | 1234567890 | 1234567890  | 1234567890  | 1234567890 | 1234567890 | 1234567890  | 1234567890 | 1234567890 | 1234567890  |
| Crocodylus_porosus_EU727191 | CCTCAACTCG | CCCTGTCCCA | CGGGGCAGGC | AGCGGGGTGG  | GTGGCGAAG   | GTTCAAAGAT | TTGTGCTGCC | TGAGGGGTCT  | GCGCGGGCAG | CCACAGGAGG | TCTGCCGAGG  |
| Xenopus_laevis_X02995       | -----      | -----      | -----      | -----       | -----       | -----      | -----      | -----       | -----      | -----      | -----       |
| Mus_musculus_NR_046233      | CCCCACACG  | TGTCTCGTTT | CGTTCC-TGC | TGGCCGGCCT  | GAGGCTA---  | CCCCTCG--G | TCCATCTG-- | TCTCTCTCTC  | TCTCCGGGGA | GAGGAGGGCG | GTGGTCTGTTG |
| Homo_sapiens_U13369         | AAACCTTCCG | ACCCCTCTCC | GGAGTCCGGT | CCCGTTTGCT  | GTCTGCTCTG  | GCCGCGCTGA | GGCAACCCCG | TCTCTCTTTG  | GGCGGGGGGG | GCGGGGGGAC | GTGCCCGGCC  |
| Rattus_norvegicus_NR_046239 | TTTTCTTACG | TGTGCCGTTT | CGTTTCGCGC | TGGCCGGCCT  | GAGGCGGAGC  | CCCCTCGCCG | TCCGTCCGGC | CCCTCCATC   | CCGCGCAGGA | GGGGCGGGCG | GGGGCGCTTG  |
| Gallus_gallus_KT445934.2    | GGCTGGCGGG | TGCCGGTCT  | CCCCTCGGCG | CCCCGTCCCG  | CCCCGCGGAG  | CGGGGCGGGC | GGGGGAGGCA | CCCCCGCGGG  | GCCTTCGGGT | CGTTTCCTCT | ACCCAGGGC   |
|                             | 6666666666 | 6666666666 | 6666666666 | 6666666666  | 6666666666  | 6666666666 | 6666666667 | 7777777777  | 7777777777 | 7777777777 | 7777777777  |
|                             | 9999999999 | 9999999999 | 9999999999 | 9999999999  | 9999999999  | 9999999999 | 9999999999 | 9999999999  | 0000000000 | 0000000000 | 0000000000  |
|                             | 3333333334 | 4444444445 | 5555555556 | 6666666667  | 7777777778  | 8888888889 | 9999999990 | 0000000001  | 1111111112 | 2222222223 | 3333333334  |
|                             | 1234567890 | 1234567890 | 1234567890 | 1234567890  | 1234567890  | 1234567890 | 1234567890 | 1234567890  | 1234567890 | 1234567890 | 1234567890  |
| Crocodylus_porosus_EU727191 | GAGGGTGGGC | ATGTGCAGAT | GTGCCTGTGC | CTTTGACACT  | CCCTGCCCAT  | GTGGCTCCTG | GAATGGAGAG | GGGTCACCCCT | GCCTCCCTCT | CTGCAGAGGG | GCCTGAAAGC  |
| Xenopus_laevis_X02995       | -----      | -----      | -----      | -----       | -----       | -----      | -----      | -----       | -----      | -----      | -----       |
| Mus_musculus_NR_046233      | GGGACTGTG  | CCGTCGTGAG | CACCCGTGAG | TTCGTCACA   | CCCGAAATAC  | CGATA----- | -----      | -----       | -----      | -----      | -----       |

|                             |            |            |            |            |            |            |            |            |            |            |            |            |            |
|-----------------------------|------------|------------|------------|------------|------------|------------|------------|------------|------------|------------|------------|------------|------------|
| Homo_sapiens_U13369         | AGGAAGGGCC | TCCTCCCGGT | GCGTCGTCGG | GAGCGCCCTC | GCCAAATCGA | CCTCGTA--- | -----      | -----      | -----      | -----      | -----      | -----      | -----      |
| Rattus_norvegicus_NR_046239 | TTGCGGTCGT | CAGCACCCCG | TGTGCGGAGT | TCCGCTCACA | CCTCAGATAA | CCGTA----- | -----      | -----      | -----      | -----      | -----      | -----      | -----      |
| Gallus_gallus_KT445934.2    | CAGGTACCTA | GCGTCCGCGC | CTCCGCGCGT | CCGGGGGGCG | GGGAGGAAGG | AGCGCGGCGC | CGGTCCCAG  | CGGGCCCGCT | CGCCACACC  | CCCCTCCTCC | CCCCGGGCCG | -----      | -----      |
|                             | 7777777777 | 7777777777 | 7777777777 | 7777777777 | 7777777777 | 7777777777 | 7777777777 | 7777777777 | 7777777777 | 7777777777 | 7777777777 | 7777777777 | 7777777777 |
|                             | 0000000000 | 0000000000 | 0000000000 | 0000000000 | 0000000000 | 0000000000 | 0000000001 | 1111111111 | 1111111111 | 1111111111 | 1111111111 | 1111111111 | 1111111111 |
|                             | 4444444444 | 5555555556 | 6666666667 | 7777777778 | 8888888889 | 9999999990 | 0000000001 | 1111111112 | 2222222223 | 3333333334 | 4444444445 | 5555555556 | 6666666667 |
|                             | 1234567890 | 1234567890 | 1234567890 | 1234567890 | 1234567890 | 1234567890 | 1234567890 | 1234567890 | 1234567890 | 1234567890 | 1234567890 | 1234567890 | 1234567890 |
| Crocodylus_porosus_EU727191 | TGATTGCTTG | TGGGCTGTGG | CTCCCTTGCC | AATGTCATCC | ACCCTGCCTA | TCGCCATCAC | CCCCACTGCA | CCCCTGGGTG | GGGCAAGGGC | TGGTCAAGGG | GAGCGGAAGG | -----      | -----      |
| Xenopus_laevis_X02995       | -----      | -----      | -----      | -----      | -----      | -----      | -----      | -----      | -----      | -----      | -----      | -----      | -----      |
| Mus_musculus_NR_046233      | -----      | -----      | -----      | -----      | -----      | -----      | -----      | -----      | -----      | -----      | -----      | -----      | -----      |
| Homo_sapiens_U13369         | -----      | -----      | -----      | -----      | -----      | -----      | -----      | -----      | -----      | -----      | -----      | -----      | -----      |
| Rattus_norvegicus_NR_046239 | -----      | -----      | -----      | -----      | -----      | -----      | -----      | -----      | -----      | -----      | -----      | -----      | -----      |
| Gallus_gallus_KT445934.2    | CGGAGCCGGG | CGGAGGTTTA | AAGACTCGGG | CGGCCCGCGG | CGCGCGCCGC | GAGGTCGGGG | GCCGGGGCGG | GTCTTCTGCC | CGCCGGCGGG | ACGCCGGGAT | GGAAGAGAGG | -----      | -----      |
|                             | 7777777777 | 7777777777 | 7777777777 | 7777777777 | 7777777777 | 7777777777 | 7777777777 | 7777777777 | 7777777777 | 7777777777 | 7777777777 | 7777777777 | 7777777777 |
|                             | 1111111111 | 1111111111 | 1111111111 | 1111111111 | 1111111112 | 2222222222 | 2222222222 | 2222222222 | 2222222222 | 2222222222 | 2222222222 | 2222222222 | 2222222222 |
|                             | 5555555556 | 6666666667 | 7777777778 | 8888888889 | 9999999990 | 0000000001 | 1111111112 | 2222222223 | 3333333334 | 4444444445 | 5555555556 | 6666666667 | 7777777778 |
|                             | 1234567890 | 1234567890 | 1234567890 | 1234567890 | 1234567890 | 1234567890 | 1234567890 | 1234567890 | 1234567890 | 1234567890 | 1234567890 | 1234567890 | 1234567890 |
| Crocodylus_porosus_EU727191 | GGTGCATGGT | CCCAGGTGCA | GCGCAGGAG  | CGCTGCGGAG | CTGTGGAGC  | CTGTGGCAGC | GCTGGCCGTG | CCCCCTAAG  | CTGAGCACCT | GGACTGAGCC | TGCAGCGGGG | -----      | -----      |
| Xenopus_laevis_X02995       | -----      | -----      | -----      | -----      | -----      | -----      | -----      | -----      | -----      | -----      | -----      | -----      | -----      |
| Mus_musculus_NR_046233      | -----      | -----      | -----      | -----      | -----      | -----      | -----      | -----      | -----      | -----      | -----      | -----      | -----      |
| Homo_sapiens_U13369         | -----      | -----      | -----      | -----      | -----      | -----      | -----      | -----      | -----      | -----      | -----      | -----      | -----      |
| Rattus_norvegicus_NR_046239 | -----      | -----      | -----      | -----      | -----      | -----      | -----      | -----      | -----      | -----      | -----      | -----      | -----      |
| Gallus_gallus_KT445934.2    | ACTCCGGGCG | GGGCGCGGCG | GCGCGCCCCG | CCGGCCCTCT | CCCTCCCGAG | CCCGCCGGCG | GCGTCGGCCG | TCGCCCGGCC | CTCGGTCTCT | CGCGGGGCGG | GCCCGGGCCG | -----      | -----      |
|                             | 7777777777 | 7777777777 | 7777777777 | 7777777777 | 7777777777 | 7777777777 | 7777777777 | 7777777777 | 7777777777 | 7777777777 | 7777777777 | 7777777777 | 7777777777 |
|                             | 2222222222 | 2222222222 | 2222222222 | 2222222223 | 3333333333 | 3333333333 | 3333333333 | 3333333333 | 3333333333 | 3333333333 | 3333333333 | 3333333333 | 3333333333 |
|                             | 6666666667 | 7777777778 | 8888888889 | 9999999990 | 0000000001 | 1111111112 | 2222222223 | 3333333334 | 4444444445 | 5555555556 | 6666666667 | 7777777778 | 8888888889 |
|                             | 1234567890 | 1234567890 | 1234567890 | 1234567890 | 1234567890 | 1234567890 | 1234567890 | 1234567890 | 1234567890 | 1234567890 | 1234567890 | 1234567890 | 1234567890 |
| Crocodylus_porosus_EU727191 | GGCTCACCTT | TGTGGCCATG | GCCCTCTCTC | AGGTTGTTAA | ACCTCTCTCC | TGTGTTTGCC | TGGTCTGTAG | GACTCCTGCC | AAGGGAAGGC | AGACAACCGG | CTGGGCAGGA | -----      | -----      |
| Xenopus_laevis_X02995       | -----      | -----      | -----      | -----      | -----      | -----      | -----      | -----      | -----      | -----      | -----      | -----      | -----      |
| Mus_musculus_NR_046233      | -----      | -----      | -----      | -----      | -----      | -----      | -----      | -----      | -----      | -----      | -----      | -----      | -----      |
| Homo_sapiens_U13369         | -----      | -----      | -----      | -----      | -----      | -----      | -----      | -----      | -----      | -----      | -----      | -----      | -----      |
| Rattus_norvegicus_NR_046239 | -----      | -----      | -----      | -----      | -----      | -----      | -----      | -----      | -----      | -----      | -----      | -----      | -----      |
| Gallus_gallus_KT445934.2    | GAGAGGGGGT | CATCCCCTCC | CCCCTCTCCG | CGGCCTCGGT | CTCGGGCGGA | GAGCTCGGCG | CGCGCGCGGG | CGCGGCTCG  | CTCCGGCCGG | CCTCGCCCCG | GTACGGAGCG | -----      | -----      |
|                             | 7777777777 | 7777777777 | 7777777777 | 7777777777 | 7777777777 | 7777777777 | 7777777777 | 7777777777 | 7777777777 | 7777777777 | 7777777777 | 7777777777 | 7777777777 |
|                             | 3333333333 | 3333333333 | 3333333334 | 4444444444 | 4444444444 | 4444444444 | 4444444444 | 4444444444 | 4444444444 | 4444444444 | 4444444444 | 4444444444 | 4444444444 |
|                             | 7777777778 | 8888888889 | 9999999990 | 0000000001 | 1111111112 | 2222222223 | 3333333334 | 4444444445 | 5555555556 | 6666666667 | 7777777778 | 8888888889 | 9999999990 |
|                             | 1234567890 | 1234567890 | 1234567890 | 1234567890 | 1234567890 | 1234567890 | 1234567890 | 1234567890 | 1234567890 | 1234567890 | 1234567890 | 1234567890 | 1234567890 |
| Crocodylus_porosus_EU727191 | ATACCTCCCC | TCCCATGACC | CCTGCCAGGT | TGCTGCAGCA | GGGAGGAAG  | GTCAGCTCAG | GGACCCTGTC | CTGACCTCGT | GCAGACCCAG | AAGCCCACCC | TCCCTCTGGC | -----      | -----      |
| Xenopus_laevis_X02995       | -----      | -----      | -----      | -----      | -----      | -----      | -----      | -----      | -----      | -----      | -----      | -----      | -----      |
| Mus_musculus_NR_046233      | -----      | -----      | -----      | -----      | -----      | -----      | -----      | -----      | -----      | -----      | -----      | -----      | -----      |
| Homo_sapiens_U13369         | -----      | -----      | -----      | -----      | -----      | -----      | -----      | -----      | -----      | -----      | -----      | -----      | -----      |
| Rattus_norvegicus_NR_046239 | -----      | -----      | -----      | -----      | -----      | -----      | -----      | -----      | -----      | -----      | -----      | -----      | -----      |
| Gallus_gallus_KT445934.2    | GGCCGAGACG | CGGGTCTCGG | CCCGGCGCCC | GCCGCTCCCC | GCGGCGGTGC | GTTCCGCGGC | CTCCCCGCCG | CGCGCGGCCG | GCGGGACGGC | GAGCCGGCCG | TCCCGCCCCG | -----      | -----      |
|                             | 7777777777 | 7777777777 | 7777777777 | 7777777777 | 7777777777 | 7777777777 | 7777777777 | 7777777777 | 7777777777 | 7777777777 | 7777777777 | 7777777777 | 7777777777 |
|                             | 4444444444 | 4444444445 | 5555555555 | 5555555555 | 5555555555 | 5555555555 | 5555555555 | 5555555555 | 5555555555 | 5555555555 | 5555555555 | 5555555555 | 5555555555 |
|                             | 8888888889 | 9999999990 | 0000000001 | 1111111112 | 2222222223 | 3333333334 | 4444444445 | 5555555556 | 6666666667 | 7777777778 | 8888888889 | 9999999990 | 0000000001 |
|                             | 1234567890 | 1234567890 | 1234567890 | 1234567890 | 1234567890 | 1234567890 | 1234567890 | 1234567890 | 1234567890 | 1234567890 | 1234567890 | 1234567890 | 1234567890 |
| Crocodylus_porosus_EU727191 | TTGGCTTCTG | CCATGCGGCG | AGGTGGCAAC | CGTGGAGAAA | AGCCTGTGCA | AAAAAAGTGA | -----      | -----      | -----      | -----      | -----      | -----      | -----      |
| Xenopus_laevis_X02995       | -----      | -----      | -----      | -----      | -----      | -----      | -----      | -----      | -----      | -----      | -----      | -----      | -----      |

|                             |            |            |             |            |            |            |             |            |            |            |            |            |            |
|-----------------------------|------------|------------|-------------|------------|------------|------------|-------------|------------|------------|------------|------------|------------|------------|
| Mus_musculus_NR_046233      | -----      | -----      | -----       | -----      | -----      | -----      | -----       | -----      | -----      | -----      | -----      | -----      | -----      |
| Homo_sapiens_U13369         | -----      | -----      | -----       | -----      | -----      | -----      | -----       | -----      | -----      | -----      | -----      | -----      | -----      |
| Rattus_norvegicus_NR_046239 | -----      | -----      | -----       | -----      | -----      | -----      | -----       | -----      | -----      | -----      | -----      | -----      | -----      |
| Gallus_gallus_KT445934.2    | GCCAGCCGCG | GCGCCGGCGG | TTCCGCTCCG  | CCGGTCCGCC | CCGCGTGCGT | CCGCACGCC  | GGCCTCCTGC  | CCTCCCTCGG | GGCCTCGCCG | CCGTTTCCCC | CTTCCGTGCG | -----      | -----      |
|                             | 7777777777 | 7777777777 | 7777777777  | 7777777777 | 7777777777 | 7777777777 | 7777777777  | 7777777777 | 7777777777 | 7777777777 | 7777777777 | 7777777777 | 7777777777 |
|                             | 5555555556 | 6666666666 | 6666666666  | 6666666666 | 6666666666 | 6666666666 | 6666666666  | 6666666666 | 6666666666 | 6666666666 | 6666666666 | 6666666666 | 6666666667 |
|                             | 9999999990 | 0000000001 | 1111111112  | 2222222223 | 3333333334 | 4444444445 | 5555555556  | 6666666667 | 7777777778 | 8888888889 | 9999999990 | -----      | -----      |
|                             | 1234567890 | 1234567890 | 1234567890  | 1234567890 | 1234567890 | 1234567890 | 1234567890  | 1234567890 | 1234567890 | 1234567890 | 1234567890 | 1234567890 | 1234567890 |
| Crocodylus_porosus_EU727191 | -----      | -----      | -----       | -----      | -----      | -----      | -----       | -----      | -----      | -----      | -----      | -----      | -----      |
| Xenopus_laevis_X02995       | -----      | -----      | -----       | -----      | -----      | -----      | -----       | -----      | -----      | -----      | -----      | -----      | -----      |
| Mus_musculus_NR_046233      | -----      | -----      | -----       | -----      | -----      | -----      | -----       | -----      | -----      | -----      | -----      | -----      | -----      |
| Homo_sapiens_U13369         | -----      | -----      | -----       | -----      | -----      | -----      | -----       | -----      | -----      | -----      | -----      | -----      | -----      |
| Rattus_norvegicus_NR_046239 | -----      | -----      | -----       | -----      | -----      | -----      | -----       | -----      | -----      | -----      | -----      | -----      | -----      |
| Gallus_gallus_KT445934.2    | AAGCCGCGTC | CTCTCCTTCG | TCCC GCCCGC | CGTCGCCTCC | CACCGCGCTT | TCGCCCTCGG | CCTCGCCGGC  | CGCGCCGGTC | GTGCGAGCGG | GAGGTCCGGC | GTGGGGCGTC | -----      | -----      |
|                             | 7777777777 | 7777777777 | 7777777777  | 7777777777 | 7777777777 | 7777777777 | 7777777777  | 7777777777 | 7777777777 | 7777777777 | 7777777777 | 7777777777 | 7777777777 |
|                             | 7777777777 | 7777777777 | 7777777777  | 7777777777 | 7777777777 | 7777777777 | 7777777777  | 7777777777 | 7777777777 | 7777777778 | 8888888888 | -----      | -----      |
|                             | 0000000001 | 1111111112 | 2222222223  | 3333333334 | 4444444445 | 5555555556 | 6666666667  | 7777777778 | 8888888889 | 9999999990 | 0000000001 | -----      | -----      |
|                             | 1234567890 | 1234567890 | 1234567890  | 1234567890 | 1234567890 | 1234567890 | 1234567890  | 1234567890 | 1234567890 | 1234567890 | 1234567890 | 1234567890 | 1234567890 |
| Crocodylus_porosus_EU727191 | -----      | -----      | -----       | -----      | -----      | -----      | -----       | -----      | -----      | -----      | -----      | -----      | -----      |
| Xenopus_laevis_X02995       | -----      | -----      | -----       | -----      | -----      | -----      | -----       | -----      | -----      | -----      | -----      | -----      | -----      |
| Mus_musculus_NR_046233      | -----      | -----      | -----       | -----      | -----      | -----      | -----       | -----      | -----      | -----      | -----      | -----      | -----      |
| Homo_sapiens_U13369         | -----      | -----      | -----       | -----      | -----      | -----      | -----       | -----      | -----      | -----      | -----      | -----      | -----      |
| Rattus_norvegicus_NR_046239 | -----      | -----      | -----       | -----      | -----      | -----      | -----       | -----      | -----      | -----      | -----      | -----      | -----      |
| Gallus_gallus_KT445934.2    | CCGCAGCCGG | TCTCCGCGCG | GAGGCGCGGG  | GAGCGGGCGC | CGCTCCCGAA | TCCGTCCCGG | TCCC GCCCGC | CGCCGTGCGC | GCGTCCGCGG | CGGGCGCGCC | GCCAGGGCGA | -----      | -----      |
|                             | 7777777777 | 7777777777 | 7777777777  | 7777777777 | 7777777777 | 7777777777 | 7777777777  | 7777777777 | 7777777777 | 7777777777 | 7777777777 | 7777777777 | 7777777777 |
|                             | 8888888888 | 8888888888 | 8888888888  | 8888888888 | 8888888888 | 8888888888 | 8888888888  | 8888888888 | 8888888888 | 8888888889 | 9999999999 | 9999999999 | 9999999999 |
|                             | 1111111112 | 2222222223 | 3333333334  | 4444444445 | 5555555556 | 6666666667 | 7777777778  | 8888888889 | 9999999990 | 0000000001 | 1111111112 | -----      | -----      |
|                             | 1234567890 | 1234567890 | 1234567890  | 1234567890 | 1234567890 | 1234567890 | 1234567890  | 1234567890 | 1234567890 | 1234567890 | 1234567890 | 1234567890 | 1234567890 |
| Crocodylus_porosus_EU727191 | -----      | -----      | -----       | -----      | -----      | -----      | -----       | -----      | -----      | -----      | -----      | -----      | -----      |
| Xenopus_laevis_X02995       | -----      | -----      | -----       | -----      | -----      | -----      | -----       | -----      | -----      | -----      | -----      | -----      | -----      |
| Mus_musculus_NR_046233      | -----      | -----      | -----       | -----      | -----      | -----      | -----       | -----      | -----      | -----      | -----      | -----      | -----      |
| Homo_sapiens_U13369         | -----      | -----      | -----       | -----      | -----      | -----      | -----       | -----      | -----      | -----      | -----      | -----      | -----      |
| Rattus_norvegicus_NR_046239 | -----      | -----      | -----       | -----      | -----      | -----      | -----       | -----      | -----      | -----      | -----      | -----      | -----      |
| Gallus_gallus_KT445934.2    | GCGAGAGGAG | GAGGCGTCCG | AGGACGAGGG  | GCGGGGGAGG | AAGGTGAGAG | GCGGCGGGGG | CGTTTCGGTG  | CGCGCTCTC  | CCGCACGGCG | AGGAAGGGGC | CGAGGTGCGC | -----      | -----      |
|                             | 7777777777 | 7777777777 | 7777777777  | 7777777777 | 7777777777 | 7777777777 | 7777777777  | 7777777777 | 7777777778 | 8888888888 | 8888888888 | 8888888888 | 8888888888 |
|                             | 9999999999 | 9999999999 | 9999999999  | 9999999999 | 9999999999 | 9999999999 | 9999999999  | 9999999999 | 9999999999 | 0000000000 | 0000000000 | 0000000000 | 0000000000 |
|                             | 2222222223 | 3333333334 | 4444444445  | 5555555556 | 6666666667 | 7777777778 | 8888888889  | 9999999990 | 0000000001 | 1111111112 | 2222222223 | -----      | -----      |
|                             | 1234567890 | 1234567890 | 1234567890  | 1234567890 | 1234567890 | 1234567890 | 1234567890  | 1234567890 | 1234567890 | 1234567890 | 1234567890 | 1234567890 | 1234567890 |
| Crocodylus_porosus_EU727191 | -----      | -----      | -----       | -----      | -----      | -----      | -----       | -----      | -----      | -----      | -----      | -----      | -----      |
| Xenopus_laevis_X02995       | -----      | -----      | -----       | -----      | -----      | -----      | -----       | -----      | -----      | -----      | -----      | -----      | -----      |
| Mus_musculus_NR_046233      | -----      | -----      | -----       | -----      | -----      | -----      | -----       | -----      | -----      | -----      | -----      | -----      | -----      |
| Homo_sapiens_U13369         | -----      | -----      | -----       | -----      | -----      | -----      | -----       | -----      | -----      | -----      | -----      | -----      | -----      |
| Rattus_norvegicus_NR_046239 | -----      | -----      | -----       | -----      | -----      | -----      | -----       | -----      | -----      | -----      | -----      | -----      | -----      |
| Gallus_gallus_KT445934.2    | GCGGGCGCCG | TCGGGCGGTC | CGGGCGGGGC  | GCGGGCCGGC | GGGCGCCGGC | GCGGCGGGCG | GGGCCTGGTC  | TGCTCCCGTC | CCCGTCGGTC | GCGGCGGGCG | CGGGCGGGGC | -----      | -----      |

|                             |            |            |            |            |            |            |             |            |            |            |            |            |
|-----------------------------|------------|------------|------------|------------|------------|------------|-------------|------------|------------|------------|------------|------------|
|                             | 8888888888 | 8888888888 | 8888888888 | 8888888888 | 8888888888 | 8888888888 | 8888888888  | 8888888888 | 8888888888 | 8888888888 | 8888888888 | 8888888888 |
|                             | 0000000000 | 0000000000 | 0000000000 | 0000000000 | 0000000000 | 0000000000 | 0000000000  | 0000000000 | 0000000000 | 0000000000 | 0000000000 | 0000000000 |
|                             | 3333333334 | 4444444445 | 5555555556 | 6666666667 | 7777777778 | 8888888889 | 9999999990  | 0000000001 | 1111111112 | 2222222223 | 3333333334 | 4444444445 |
|                             | 1234567890 | 1234567890 | 1234567890 | 1234567890 | 1234567890 | 1234567890 | 1234567890  | 1234567890 | 1234567890 | 1234567890 | 1234567890 | 1234567890 |
| Crocodylus_porosus_EU727191 | -----      | -----      | -----      | -----      | -----      | -----      | -----       | -----      | -----      | -----      | -----      | -----      |
| Xenopus_laevis_X02995       | -----      | -----      | -----      | -----      | -----      | -----      | -----       | -----      | -----      | -----      | -----      | -----      |
| Mus_musculus_NR_046233      | -----      | -----      | -----      | -----      | -----      | -----      | -----       | -----      | -----      | -----      | -----      | -----      |
| Homo_sapiens_U13369         | -----      | -----      | -----      | -----      | -----      | -----      | -----       | -----      | -----      | -----      | -----      | -----      |
| Rattus_norvegicus_NR_046239 | -----      | -----      | -----      | -----      | -----      | -----      | -----       | -----      | -----      | -----      | -----      | -----      |
| Gallus_gallus_KT445934.2    | GGTCCGTCGC | GGCAGCGGGG | CTTCGCGCCG | GGCGGCGCGC | GCCGTCCCGC | GGGCGTCCGC | GGCTCCTCCG  | CCCGGGCCCG | GCCGAGCCCG | GCGCCTGGTC | CGTCCCGGAA |            |
|                             | 8888888888 | 8888888888 | 8888888888 | 8888888888 | 8888888888 | 8888888888 | 8888888888  | 8888888888 | 8888888888 | 8888888888 | 8888888888 | 8888888888 |
|                             | 1111111111 | 1111111111 | 1111111111 | 1111111111 | 1111111111 | 1111111112 | 2222222222  | 2222222222 | 2222222222 | 2222222222 | 2222222222 | 2222222222 |
|                             | 4444444445 | 5555555556 | 6666666667 | 7777777778 | 8888888889 | 9999999990 | 0000000001  | 1111111112 | 2222222223 | 3333333334 | 4444444445 | 5555555556 |
|                             | 1234567890 | 1234567890 | 1234567890 | 1234567890 | 1234567890 | 1234567890 | 1234567890  | 1234567890 | 1234567890 | 1234567890 | 1234567890 | 1234567890 |
| Crocodylus_porosus_EU727191 | -----      | -----      | -----      | -----      | -----      | -----      | -----       | -----      | -----      | -----      | -----      | -----      |
| Xenopus_laevis_X02995       | -----      | -----      | -----      | -----      | -----      | -----      | -----       | -----      | -----      | -----      | -----      | -----      |
| Mus_musculus_NR_046233      | -----      | -----      | -----      | -----      | -----      | -----      | -----       | -----      | -----      | -----      | -----      | -----      |
| Homo_sapiens_U13369         | -----      | -----      | -----      | -----      | -----      | -----      | -----       | -----      | -----      | -----      | -----      | -----      |
| Rattus_norvegicus_NR_046239 | -----      | -----      | -----      | -----      | -----      | -----      | -----       | -----      | -----      | -----      | -----      | -----      |
| Gallus_gallus_KT445934.2    | GCGAGACAGG | GTCGTTTCCC | CAGGTCGGGA | GCGAGGGCTC | CCCGCCCTTC | TCGTTCGGGT | CGCGCTTCAT  | TGCCGGCCCG | CCGGCCGGCC | GTCGCCGGCT | TTTTTTTTTC |            |
|                             | 8888888888 | 8888888888 | 8888888888 | 8888888888 | 8888888888 | 8888888888 | 8888888888  | 8888888888 | 8888888888 | 8888888888 | 8888888888 | 8888888888 |
|                             | 2222222222 | 2222222222 | 2222222222 | 2222222222 | 2222222223 | 3333333333 | 3333333333  | 3333333333 | 3333333333 | 3333333333 | 3333333333 | 3333333333 |
|                             | 5555555556 | 6666666667 | 7777777778 | 8888888889 | 9999999990 | 0000000001 | 1111111112  | 2222222223 | 3333333334 | 4444444445 | 5555555556 | 6666666667 |
|                             | 1234567890 | 1234567890 | 1234567890 | 1234567890 | 1234567890 | 1234567890 | 1234567890  | 1234567890 | 1234567890 | 1234567890 | 1234567890 | 1234567890 |
| Crocodylus_porosus_EU727191 | -----      | -----      | -----      | -----      | -----      | -----      | -----       | -----      | -----      | -----      | -----      | -----      |
| Xenopus_laevis_X02995       | -----      | -----      | -----      | -----      | -----      | -----      | -----       | -----      | -----      | -----      | -----      | -----      |
| Mus_musculus_NR_046233      | -----      | -----      | -----      | -----      | -----      | -----      | -----       | -----      | -----      | -----      | -----      | -----      |
| Homo_sapiens_U13369         | -----      | -----      | -----      | -----      | -----      | -----      | -----       | -----      | -----      | -----      | -----      | -----      |
| Rattus_norvegicus_NR_046239 | -----      | -----      | -----      | -----      | -----      | -----      | -----       | -----      | -----      | -----      | -----      | -----      |
| Gallus_gallus_KT445934.2    | CTCCGCATC  | CGATATTCTG | GTGCTCGTAC | GGTCAGCGGA | GGCGACGCTC | GTCCGCCCCG | CGGTCGCCCC  | GCGTCGGGG  | CTGGCCGCGG | GCGCGGGCCG | AGCGCCTTCG |            |
|                             | 8888888888 | 8888888888 | 8888888888 | 8888888888 | 8888888888 | 8888888888 | 8888888888  | 8888888888 | 8888888888 | 8888888888 | 8888888888 | 8888888888 |
|                             | 3333333333 | 3333333333 | 3333333333 | 3333333334 | 4444444444 | 4444444444 | 4444444444  | 4444444444 | 4444444444 | 4444444444 | 4444444444 | 4444444444 |
|                             | 6666666667 | 7777777778 | 8888888889 | 9999999990 | 0000000001 | 1111111112 | 2222222223  | 3333333334 | 4444444445 | 5555555556 | 6666666667 | 7777777778 |
|                             | 1234567890 | 1234567890 | 1234567890 | 1234567890 | 1234567890 | 1234567890 | 1234567890  | 1234567890 | 1234567890 | 1234567890 | 1234567890 | 1234567890 |
| Crocodylus_porosus_EU727191 | -----      | -----      | -----      | -----      | -----      | -----      | -----       | -----      | -----      | -----      | -----      | -----      |
| Xenopus_laevis_X02995       | -----      | -----      | -----      | -----      | -----      | -----      | -----       | -----      | -----      | -----      | -----      | -----      |
| Mus_musculus_NR_046233      | -----      | -----      | -----      | -----      | -----      | -----      | -----       | -----      | -----      | -----      | -----      | -----      |
| Homo_sapiens_U13369         | -----      | -----      | -----      | -----      | -----      | -----      | -----       | -----      | -----      | -----      | -----      | -----      |
| Rattus_norvegicus_NR_046239 | -----      | -----      | -----      | -----      | -----      | -----      | -----       | -----      | -----      | -----      | -----      | -----      |
| Gallus_gallus_KT445934.2    | GGCAAGCGA  | GAGAGAACGA | GAGCGGTCCC | CCCGCGCGCG | CGGGCGGGTG | CCGAAAGTCA | GA---CAACT  | CTTAGCGGTG | GATCACTCGG | CTCGTGCCTG | GATGAAGAAC |            |
|                             | 8888888888 | 8888888888 | 8888888888 | 8888888888 | 8888888888 | 8888888888 | 8888888888  | 8888888888 | 8888888888 | 8888888888 | 8888888888 | 8888888888 |
|                             | 4444444444 | 4444444444 | 4444444445 | 5555555555 | 5555555555 | 5555555555 | 5555555555  | 5555555555 | 5555555555 | 5555555555 | 5555555555 | 5555555555 |
|                             | 7777777778 | 8888888889 | 9999999990 | 0000000001 | 1111111112 | 2222222223 | 3333333334  | 4444444445 | 5555555556 | 6666666667 | 7777777778 | 8888888889 |
|                             | 1234567890 | 1234567890 | 1234567890 | 1234567890 | 1234567890 | 1234567890 | 1234567890  | 1234567890 | 1234567890 | 1234567890 | 1234567890 | 1234567890 |
| Crocodylus_porosus_EU727191 | CCAGCTATCT | GCAAGAATTA | ATGTGATTTG | CAGGACACAC | TGATCATTGA | CACCTCGAAC | GCAC--TTGCG | GCCCTGGGTT | CCTCCTGGGG | CTATGCCGGT | CTGAGCATCG |            |
| Xenopus_laevis_X02995       | GCAGCTAGCT | GCGAGAATTA | GTGTGAATTG | CAGGACACAT | TGATCATCGA | CACCTCGAAC | GCACCTTGCG  | GCCCCGGGTT | CCTCCCGGGG | CCACGCCTGT | CTGAGGGTTC |            |
| Mus_musculus_NR_046233      | GCAGCTAGCT | GCGAGAATTA | ATGTGAATTG | CAGGACACAT | TGATCATCGA | CACCTCGAAC | GCAC--TTGCG | GCCCCGGGTT | CCTCCCGGGG | CTACGCCTGT | CTGAGCGTCG |            |
| Homo_sapiens_U13369         | GCAGCTAGCT | GCGAGAATTA | ATGTGAATTG | CAGGACACAT | TGATCATCGA | CACCTCGAAC | GCAC--TTGCG | GCCCCGGGTT | CCTCCCGGGG | CTACGCCTGT | CTGAGCGTCG |            |
| Rattus_norvegicus_NR_046239 | GCAGCTAGCT | GCGAGAATTA | ATGTGAATTG | CAGGACACAT | TGATCATCGA | CACCTCGAAC | GCAC--TTGCG | GCCCCGGGTT | CCTCCCGGGG | CTACGCCTGT | CTGAGCGTCG |            |
| Gallus_gallus_KT445934.2    | GCAGCTAGCT | GCGAGAATTA | ATGTGAATTG | CAGGACACAT | TGATCATCGA | CACCTCGAAC | GCAC--TTGCG | GCCCCGGGTT | CCTCCCGGGG | CTACGCCTGT | CTGAGCGTCG |            |





|                             |            |            |            |            |            |            |            |            |            |            |            |
|-----------------------------|------------|------------|------------|------------|------------|------------|------------|------------|------------|------------|------------|
| Gallus_gallus_KT445934.2    | GGCGGCGGTA | ACGCGCCGTG | CTGCCGCGCG | CGTGGCGGTC | CGGGTCGGGG | CGAGGCTGCC | GGCTCCGGT  | CGTCCGCCCG | TCCGTCCGGC | CGAGCCCGGC | GCGCGTCCCC |
|                             | 999999999  | 999999999  | 999999999  | 999999999  | 999999999  | 999999999  | 999999999  | 999999999  | 999999999  | 999999999  | 999999999  |
|                             | 111111111  | 111111111  | 111111111  | 111111111  | 111111111  | 111111111  | 111111111  | 111111112  | 222222222  | 222222222  | 222222222  |
|                             | 333333333  | 444444444  | 555555555  | 666666666  | 777777777  | 888888888  | 999999999  | 000000001  | 111111112  | 222222222  | 333333333  |
|                             | 123456789  | 123456789  | 123456789  | 123456789  | 123456789  | 123456789  | 123456789  | 123456789  | 123456789  | 123456789  | 123456789  |
| Crocodylus_porosus_EU727191 | CCCCTGTCT  | CTGCTGCCTT | CCCTCTGCCG | GGCCCTCTCT | GCCCCACGCG | TTCCCGGCTT | TCACGCCAGG | GTGTGCCGTA | TGCGGCTGCT | CCTCCCTCAG | GGCTGTTCTC |
| Xenopus_laevis_X02995       | -----      | -----      | -----      | -----      | -----      | -----      | -----      | -----      | -----      | -----      | -----      |
| Mus_musculus_NR_046233      | GTCGCCCGGC | GCCGCGCAC  | C-TCCGGCTT | GTGTGGAGGG | AGAGCGAGGG | CGAGAACGGA | GAGAGGTGGT | ATCCCCGGTG | GCGTTGCGAG | GGAGGGTTTG | GCGTCCCAGG |
| Homo_sapiens_U13369         | GCCGCCCGGC | CCCAGTGGCG | GCCCGCGGTC | CGCCCGACCG | CGCCCTCCCC | GCGCCCTCCA | TCCTCCCCGC | CGCCCTCCTT | CCGAGGCCCC | GCCCGTCTCT | CTCGCCCTCC |
| Rattus_norvegicus_NR_046239 | TCCGCC-GCC | GCCGCGCGCC | CGCCCGGTGC | GTGCGGAGAG | AGAGAGAGAG | -----AGA   | GAGA-----  | ---CCCGCGA | GGGTCGTTCC | GGGGGGC--- | -CGTACCAGG |
| Gallus_gallus_KT445934.2    | GCGGGTCCGT | CTCCGGCCAC | CGTGCGCCCG | CGGCGGCGCG | GGCGGTGCGA | ACCGCCGCGC | GCGCGCCGGC | TCCCCCGTCC | GGGCGTTCTT | CCCTCGGCAG | CGCCGGGAGC |
|                             | 999999999  | 999999999  | 999999999  | 999999999  | 999999999  | 999999999  | 999999999  | 999999999  | 999999999  | 999999999  | 999999999  |
|                             | 222222222  | 222222222  | 222222222  | 222222222  | 222222222  | 222222222  | 222222222  | 333333333  | 333333333  | 333333333  | 333333333  |
|                             | 444444444  | 555555555  | 666666666  | 777777777  | 888888888  | 999999999  | 000000001  | 111111112  | 222222222  | 333333334  | 444444444  |
|                             | 123456789  | 123456789  | 123456789  | 123456789  | 123456789  | 123456789  | 123456789  | 123456789  | 123456789  | 123456789  | 123456789  |
| Crocodylus_porosus_EU727191 | CCCAGGTTCC | TTCCATCGGG | CCTCCTTTGG | AGACGGCGCA | GTCTCCTGTG | GCTGTGGTGG | GTAGGACTGC | ACATGTGCAC | AGCATGCTGA | GAGACCAGGC | CGGCCCTGTC |
| Xenopus_laevis_X02995       | -----      | -----      | -----      | -----      | -----      | -----      | -----      | -----      | -----      | -----      | -----      |
| Mus_musculus_NR_046233      | TCCGTCCGTC | CCTCCCTCCC | TCGGTGGGCG | CCTTCGCGCC | GCACGCGGCC | GCTAGGGGCG | GTGCGGGGCC | GTGGCCCCCG | TGGCTTCTCT | TCGTCTCCGC | TTCTCCTTCA |
| Homo_sapiens_U13369         | CCGCGCGTAC | GCAGCGCGCC | CCGCCCGCCC | GGCTCGCCTC | GCGGCGCGTC | GGCCGGGGCC | GGGAGCCCGC | CCCAGCCGCC | GCCCGTGGCC | GCGGCGCCCG | GGTTCGCGTG |
| Rattus_norvegicus_NR_046239 | CCCG-----  | -----      | -----      | -----      | -----      | -----      | -----      | GT--CTCGCG | TCCCTCTCCT | CC---CCCGC | TCCCTCT--A |
| Gallus_gallus_KT445934.2    | AGCCGCTTGG | CGTCCGAAGG | CGGGTGGCCG | GGCGAGCGCG | GGCTCGCCCC | GGGCCCGGCG | TTCGGGCCCC | GTTTCCGAT- | -----      | -----      | -----      |
|                             | 999999999  | 999999999  | 999999999  | 999999999  | 999999999  | 999999999  | 999999999  | 999999999  | 999999999  | 999999999  | 999999999  |
|                             | 333333333  | 333333333  | 333333333  | 333333333  | 333333333  | 444444444  | 444444444  | 444444444  | 444444444  | 444444444  | 444444444  |
|                             | 555555555  | 666666666  | 777777777  | 888888888  | 999999999  | 000000001  | 111111112  | 222222222  | 333333334  | 444444444  | 555555555  |
|                             | 123456789  | 123456789  | 123456789  | 123456789  | 123456789  | 123456789  | 123456789  | 123456789  | 123456789  | 123456789  | 123456789  |
| Crocodylus_porosus_EU727191 | CGGTACCAGG | TTTCTCGGCC | ATCCCGCCTC | TCAAACCTCT | CCCACACCTG | CACCCTCCCA | TCCAGC---- | -----      | -----      | -----      | -----      |
| Xenopus_laevis_X02995       | -----      | -----      | -----      | -----      | -----      | -----      | -----      | -----      | -----      | -----      | -----      |
| Mus_musculus_NR_046233      | CCCGGGCGGT | ACCCGCTCCG | GCGCCGGCCC | GCGGGACGCC | GCGGCGTCCG | TGCGCCGATG | CGAGTCAACC | CCGGGTGTTG | CGA--GTTCC | GGGAGGGAGA | GGCCCTCGCT |
| Homo_sapiens_U13369         | TCCCGGCGGG | CGACCCGCGG | GACGCCGCGG | TGTCGTCCCG | CGTCGCGCGC | CCGCCTCCGG | CTCGCGGCCG | CGCCGCGCCG | CGCCGGGGCC | CCGTCCGAGG | CTTCCGCGTC |
| Rattus_norvegicus_NR_046239 | CCGGGGCCGA | --CCGCTCCG | GCGCCGGCCC | GCGG--CGCC | GCGGCGTCCG | TGCGCCGACG | CGACTTGCCC | CCGGGATGTT | GGGCCGGGCC | GCGAAGGAGA | GG--TCGCG  |
| Gallus_gallus_KT445934.2    | -----      | -----      | -----      | -----      | -----      | -----      | -----      | -----      | -----      | -----      | -----      |
|                             | 999999999  | 999999999  | 999999999  | 999999999  | 999999999  | 999999999  | 999999999  | 999999999  | 999999999  | 999999999  | 999999999  |
|                             | 444444444  | 444444444  | 444444444  | 444444444  | 555555555  | 555555555  | 555555555  | 555555555  | 555555555  | 555555555  | 555555555  |
|                             | 666666666  | 777777777  | 888888888  | 999999999  | 000000001  | 111111112  | 222222222  | 333333334  | 444444444  | 555555556  | 666666666  |
|                             | 123456789  | 123456789  | 123456789  | 123456789  | 123456789  | 123456789  | 123456789  | 123456789  | 123456789  | 123456789  | 123456789  |
| Crocodylus_porosus_EU727191 | -----      | -----      | -----      | -----      | -----      | -----      | -----      | -----      | -----      | -----      | -----      |
| Xenopus_laevis_X02995       | -----      | -----      | -----      | -----      | -----      | -----      | -----      | -----      | -----      | -----      | -----      |
| Mus_musculus_NR_046233      | GACCCGTTGC | GTCCCGGCTT | CCCTGGGGGG | GACCCGGCGT | CTGTGGGCTG | TGCGTCCCGG | GGGTGCGGTG | TGAGTAAGAT | CCTCCACCCC | CGCCGCCCTC | CCCTCCCGCC |
| Homo_sapiens_U13369         | GGGGCGGCGC | GGTCCGCGCC | CCGCGTCTCT | GGACCCGCTC | CCCCGACCTC | CGCGGGGGAG | ACGCGCCGGG | GCGTGGGCGG | CCCCTCCCGC | CCCCGGCCCG | TGCCCTCCCT |
| Rattus_norvegicus_NR_046239 | GGCTC----  | GGCCTGGCTC | CCC-----   | ----CGGCGC | CCTCGCCCCG | T-CGTCCCGT | CGTTCTCG-- | -----      | -----CTCT  | CGCTCTCTCT | TCCTC----- |
| Gallus_gallus_KT445934.2    | -----      | -----      | -----      | -----      | -----      | -----      | -----      | -----      | -----      | -----      | -----      |
|                             | 999999999  | 999999999  | 999999999  | 999999999  | 999999999  | 999999999  | 999999999  | 999999999  | 999999999  | 999999999  | 999999999  |
|                             | 555555555  | 555555555  | 555555555  | 666666666  | 666666666  | 666666666  | 666666666  | 666666666  | 666666666  | 666666666  | 666666666  |
|                             | 777777777  | 888888888  | 999999999  | 000000001  | 111111112  | 222222222  | 333333334  | 444444444  | 555555555  | 666666666  | 777777777  |
|                             | 123456789  | 123456789  | 123456789  | 123456789  | 123456789  | 123456789  | 123456789  | 123456789  | 123456789  | 123456789  | 123456789  |
| Crocodylus_porosus_EU727191 | -----      | -----      | -----      | -----      | -----      | -----      | -----      | -----      | -----      | -----      | -----      |
| Xenopus_laevis_X02995       | -----      | -----      | -----      | -----      | -----      | -----      | -----      | -----      | -----      | -----      | -----      |
| Mus_musculus_NR_046233      | GGCCTCTCGG | GGACCCCTTG | AGACGGTTTC | CCGGCTCGTC | CTCCCGTGCC | GCCGGGTGCC | GTCTCTTTCC | CGCCCGCCTC | CTCGCTCTCT | TCTTCCCGCG | GCTGGGCGCG |
| Homo_sapiens_U13369         | TCCGGTCTGC | CCGCTCCGGC | GGGGCGGCGC | GGGGCGCCCG | TCGGCCGCGC | GCTCTCTCTC | CCGTCTCTCT | TCCCCCTCGC | CGGGCCCGTC | TCCCGACGGA | GCTCGGGCGC |

|                             |            |            |            |            |            |            |            |            |            |            |              |
|-----------------------------|------------|------------|------------|------------|------------|------------|------------|------------|------------|------------|--------------|
| Rattus_norvegicus_NR_046239 | -----      | -----      | -----      | -----TC    | CTCTCCTTCC | GTCG-----  | -----CC    | CGCGCGCGCC | CAC-CTCTCC | TCCT-----  | -----        |
| Gallus_gallus_KT445934.2    | -----      | -----      | -----      | -----      | -----      | -----      | -----      | -----      | -----      | -----      | -----        |
|                             | 9999999999 | 9999999999 | 9999999999 | 9999999999 | 9999999999 | 9999999999 | 9999999999 | 9999999999 | 9999999999 | 9999999999 | 9999999999   |
|                             | 6666666666 | 6666666667 | 7777777777 | 7777777777 | 7777777777 | 7777777777 | 7777777777 | 7777777777 | 7777777777 | 7777777777 | 7777777777   |
|                             | 8888888889 | 9999999990 | 0000000001 | 1111111112 | 2222222223 | 3333333334 | 4444444445 | 5555555556 | 6666666667 | 7777777778 | 8888888889   |
|                             | 1234567890 | 1234567890 | 1234567890 | 1234567890 | 1234567890 | 1234567890 | 1234567890 | 1234567890 | 1234567890 | 1234567890 | 1234567890   |
| Crocodylus_porosus_EU727191 | -----      | -----      | -----      | -----      | -----      | -----      | -----TG    | CTCAGATTAG | ACTTGGTGAC | CTGCTGAATT | TAAGCATATT   |
| Xenopus_laevis_X02995       | -----      | -----      | -----      | -----      | -----      | -----      | -----TC    | CAGATCAG   | ACGCGGCGAC | CCGCTGAATT | TAAGCATATT   |
| Mus_musculus_NR_046233      | TGTCCCCCT  | TTCTGAC--- | -----      | -----      | -----      | -----      | -----CG    | CAGATCAG   | ACGTGGCGAC | CCGCTGAATT | TAAGCATATT   |
| Homo_sapiens_U13369         | GGCGGTCGGG | CCGGCGCGAT | TCCGTCGGTC | CGTCCGCCGA | GCGGCCCGTC | CCCCTCCGAG | A---CG     | CAGATCAG   | ACGTGGCGAC | CCGCTGAATT | TAAGCATATT   |
| Rattus_norvegicus_NR_046239 | --TCTCCTCC | TCTGGAC--- | -----      | -----      | -----      | -----      | -----CG    | CAGATCAG   | ACGTGGCGAC | CCGCTGAATT | TAAGCATATT   |
| Gallus_gallus_KT445934.2    | -----      | -----      | -----      | -----      | -----      | -----      | -----CG    | CAGATCAG   | ACGTGGCGAC | CCGCTGAATT | TAAGCATATT   |
|                             | 9999999999 | 9999999999 | 9999999999 | 9999999999 | 9999999999 | 9999999999 | 9999999999 | 9999999999 | 9999999999 | 9999999999 | 9999999999   |
|                             | 7777777778 | 8888888888 | 8888888888 | 8888888888 | 8888888888 | 8888888888 | 8888888888 | 8888888888 | 8888888888 | 8888888888 | 8888888888   |
|                             | 9999999990 | 0000000001 | 1111111112 | 2222222223 | 3333333334 | 4444444445 | 5555555556 | 6666666667 | 7777777778 | 8888888889 | 9999999990   |
|                             | 1234567890 | 1234567890 | 1234567890 | 1234567890 | 1234567890 | 1234567890 | 1234567890 | 1234567890 | 1234567890 | 1234567890 | 1234567890   |
| Crocodylus_porosus_EU727191 | AGTCAGTGGA | GGAAAAGAAA | CTAACCAGGA | TTCCCTCAGT | AACGGTGAGT | GAACAGGGAA | GAGCCCAGCG | CCGAATCCCC | ATCCTGCAGT | AGTGTGTAGG | AAATGTGGTG   |
| Xenopus_laevis_X02995       | ACTAAGCGGA | GGAAAAGAAA | CTAACCAGGA | TTCCCTCAGT | AACGGCGAGT | GAACAGGGAA | GAGCCCAGCG | CCGAATCCCC | CGCCCGC--- | CGGGCGCGGG | ACGTGTGGCG   |
| Mus_musculus_NR_046233      | AGTCAGCGGA | GGAAAAGAAA | CTAACCAGGA | TTCCCTCAGT | AACGGCGAGT | GAACAGGGAA | GAGCCCAGCG | CCGAATCCCC | GCCGCGCGTC | GCGGCGTGCC | AAATGTGGCG   |
| Homo_sapiens_U13369         | AGTCAGCGGA | GGAAAAGAAA | CTAACCAGGA | TTCCCTCAGT | AACGGCGAGT | GAACAGGGAA | GAGCCCAGCG | CCGAATCCCC | GCCCGC---  | GGGGCGCGGG | ACATGTGGCG   |
| Rattus_norvegicus_NR_046239 | AGTCAGCGGA | GGAAAAGAAA | CTAACCAGGA | TTCCCTCAGT | AACGGCGAGT | GAACAGGGAA | GAGCCCAGCG | CCGAATCCCC | GCCGCGCGCC | GCGGCGCGGG | AAATGTGGCG   |
| Gallus_gallus_KT445934.2    | AGTCAGCGGA | GGAAAAGAAA | CTAACGAGGA | TTCCCTCAGT | AACGGCGAGT | GAACAGGGAA | GAGCCCAGCG | CCGAATCCCC | GCCCCGCGGT | GGGGCGCGGG | AGGTGTGGCG   |
|                             | 9999999999 | 9999999999 | 9999999999 | 9999999999 | 9999999999 | 9999999999 | 9999999999 | 9999999999 | 9999999999 | 9999999999 | 1 1111111111 |
|                             | 9999999999 | 9999999999 | 9999999999 | 9999999999 | 9999999999 | 9999999999 | 9999999999 | 9999999999 | 9999999999 | 9999999999 | 0000000000   |
|                             | 0000000001 | 1111111112 | 2222222223 | 3333333334 | 4444444445 | 5555555556 | 6666666667 | 7777777778 | 8888888889 | 9999999990 | 0000000001   |
|                             | 1234567890 | 1234567890 | 1234567890 | 1234567890 | 1234567890 | 1234567890 | 1234567890 | 1234567890 | 1234567890 | 1234567890 | 1234567890   |
| Crocodylus_porosus_EU727191 | GTGTACAGAA | GACCCA--CT | CCCCAGTGCC | GCTCTCGGGG | GCCCCAAGTC | CTTCTGATCA | AGGCACAGCC | CGTGGATGGT | GTGAGGGCAG | TAG-TGGCCC | CTGGTGCGCT   |
| Xenopus_laevis_X02995       | ---TACGGGA | GACCGGACCC | CCCCGGCGCG | GCTCG--GG  | GGCCCAAGTC | CTTCTGATCG | AGGCCAGCC  | CGCGGACGGT | GTTAGGCCGG | TGGGCGGCC  | CCGGCGCGCC   |
| Mus_musculus_NR_046233      | ---TACGGAA | GACCCA--CT | CCCCGGCGCC | GCTCGTGGGG | GGCCCAAGTC | CTTCTGATCG | AGGCCAGCC  | CGTGGACGGT | GTGAGGCCGG | TAG-CGGCCC | -CGGCGCGCC   |
| Homo_sapiens_U13369         | ---TACGGAA | GACCCG--CT | CCCCGGCGCC | GCTCGTGGGG | GGCCCAAGTC | CTTCTGATCG | AGGCCAGCC  | CGTGGACGGT | GTGAGGCCGG | TAG-CGGC-- | -CGGCGCGC-   |
| Rattus_norvegicus_NR_046239 | ---TACGGAA | GACCCA--CT | CCCCGGCGCC | GCTCGTGGGG | GGCCCAAGTC | CTTCTGATCG | AGGCCAGCC  | CGTGGACGGT | GTGAGGCCGG | TAG-CGGCCC | -CGGCGCGCC   |
| Gallus_gallus_KT445934.2    | ---TACGGAA | GCCCC--AT  | CCCCGGCGCC | GCTCTCGGGG | GGCCCAAGTC | CTTCTGATCG | AGGCCAGCC  | CGCGGACGGT | GTGAGGCCGG | TAGCGGCC   | CCGGCGCGCC   |
|                             | 1111111111 | 1111111111 | 1111111111 | 1111111111 | 1111111111 | 1111111111 | 1111111111 | 1111111111 | 1111111111 | 1111111111 | 1111111111   |
|                             | 0000000000 | 0000000000 | 0000000000 | 0000000000 | 0000000000 | 0000000000 | 0000000000 | 0000000000 | 0000000000 | 0000000000 | 0000000000   |
|                             | 0000000000 | 0000000000 | 0000000000 | 0000000000 | 0000000000 | 0000000000 | 0000000000 | 0000000000 | 0000000001 | 1111111111 | 1111111111   |
|                             | 1111111112 | 2222222223 | 3333333334 | 4444444445 | 5555555556 | 6666666667 | 7777777778 | 8888888889 | 9999999990 | 0000000001 | 1111111112   |
|                             | 1234567890 | 1234567890 | 1234567890 | 1234567890 | 1234567890 | 1234567890 | 1234567890 | 1234567890 | 1234567890 | 1234567890 | 1234567890   |
| Crocodylus_porosus_EU727191 | GGGAGTGGGT | CTTCTCAGAG | TTGGGTTGCT | TGGCAATGCA | GCCCAAAGCA | GGTGGTAAAC | TC-ATCTAAG | GCTAAATACT | AGCACAAGGC | CAATAGTCAG | CAAGTACTGT   |
| Xenopus_laevis_X02995       | GGGACCCGGT | CTCCTCGGAG | TCGGGTTGTT | TGGGAATGCA | GCCCAAAGCG | GGTGGTAAAC | TCCATCTAAG | GCTAAATACT | GGCACGAGAC | CGATAGTCAG | CAAGTACCGT   |
| Mus_musculus_NR_046233      | GGGCTCGGGT | CTTCCCGGAG | TCGGGTTGCT | TGGGAATGCA | GCCCAAAGCG | GGTGGTAAAC | TCCATCTAAG | GCTAAATACT | GGCACGAGAC | CGATAGTCAG | CAAGTACCGT   |
| Homo_sapiens_U13369         | --GCCCGGGT | CTTCCCGGAG | TCGGGTTGCT | TGGGAATGCA | GCCCAAAGCG | GGTGGTAAAC | TCCATCTAAG | GCTAAATACT | GGCACGAGAC | CGATAGTCAG | CAAGTACCGT   |
| Rattus_norvegicus_NR_046239 | GGGCCCGGGT | CTTCCCGGAG | TCGGGTTGCT | TGGGAATGCA | GCCCAAAGCG | GGTGGTAAAC | TCCATCTAAG | GCTAAATACT | GGCACGAGAC | CGATAGTCAG | CAAGTACCGT   |
| Gallus_gallus_KT445934.2    | GGGCCCGGGG | CTTCTCGGAG | TCGGGTTGCT | TGGGAATGCA | GCCCAAAGCG | GGTGGTAAAC | TCCATCTAAG | GCTAAATACT | GGCACGAGAC | CGATAGTCAG | CAAGTACCGT   |



|                             |            |            |            |             |            |            |            |            |            |            |            |            |            |            |            |
|-----------------------------|------------|------------|------------|-------------|------------|------------|------------|------------|------------|------------|------------|------------|------------|------------|------------|
|                             | 1111111111 | 1111111111 | 1111111111 | 1111111111  | 1111111111 | 1111111111 | 1111111111 | 1111111111 | 1111111111 | 1111111111 | 1111111111 | 1111111111 | 1111111111 | 1111111111 | 1111111111 |
|                             | 0000000000 | 0000000000 | 0000000000 | 0000000000  | 0000000000 | 0000000000 | 0000000000 | 0000000000 | 0000000000 | 0000000000 | 0000000000 | 0000000000 | 0000000000 | 0000000000 | 0000000000 |
|                             | 5555555555 | 5555555555 | 5555555555 | 5555555555  | 5555555555 | 6666666666 | 6666666666 | 6666666666 | 6666666666 | 6666666666 | 6666666666 | 6666666666 | 6666666666 | 6666666666 | 6666666666 |
|                             | 6666666667 | 7777777778 | 8888888889 | 9999999990  | 0000000001 | 1111111112 | 2222222223 | 3333333334 | 4444444445 | 5555555556 | 6666666667 | 7777777778 | 8888888889 | 9999999990 | 0000000001 |
|                             | 1234567890 | 1234567890 | 1234567890 | 1234567890  | 1234567890 | 1234567890 | 1234567890 | 1234567890 | 1234567890 | 1234567890 | 1234567890 | 1234567890 | 1234567890 | 1234567890 | 1234567890 |
| Crocodylus_porosus_EU727191 | -----      | -----      | -----      | -----       | -----      | -----      | -----      | -----      | -----      | -----      | -----      | -----      | -----      | -----      | -----      |
| Xenopus_laevis_X02995       | -----      | -----      | -----      | -----       | -----      | -----      | -----      | -----      | -----      | -----      | -----      | -----      | -----      | -----      | -----      |
| Mus_musculus_NR_046233      | -----      | -----      | -----      | -----       | -----      | -----      | -----      | -----      | -----      | -----      | -----      | -----      | -----      | -----      | -----      |
| Homo_sapiens_U13369         | CGTCCGTC   | TCCGTCTC   | TCCTCCCC   | TCTCCGCC    | CCGGCCCC   | GTCCTCCCTC | GGGAGGGCGC | GCGGGTCGGG | GCGGCGGGCG | CGGCGGGCGT | GGCGGGCG   | GGCGGGCG   | GGCGGGCG   | GGCGGGCG   | GGCGGGCG   |
| Rattus_norvegicus_NR_046239 | -----      | -----      | -----      | -----       | -----      | -----      | -----      | -----      | -----      | -----      | -----      | -----      | -----      | -----      | -----      |
| Gallus_gallus_KT445934.2    | -----      | -----      | -----      | -----       | -----      | -----      | -----      | -----      | -----      | -----      | -----      | -----      | -----      | -----      | -----      |
|                             |            |            |            |             |            |            |            |            |            |            |            |            |            |            |            |
|                             | 1111111111 | 1111111111 | 1111111111 | 1111111111  | 1111111111 | 1111111111 | 1111111111 | 1111111111 | 1111111111 | 1111111111 | 1111111111 | 1111111111 | 1111111111 | 1111111111 | 1111111111 |
|                             | 0000000000 | 0000000000 | 0000000000 | 0000000000  | 0000000000 | 0000000000 | 0000000000 | 0000000000 | 0000000000 | 0000000000 | 0000000000 | 0000000000 | 0000000000 | 0000000000 | 0000000000 |
|                             | 6666666666 | 6666666666 | 6666666666 | 7777777777  | 7777777777 | 7777777777 | 7777777777 | 7777777777 | 7777777777 | 7777777777 | 7777777777 | 7777777777 | 7777777777 | 7777777777 | 7777777777 |
|                             | 7777777778 | 8888888889 | 9999999990 | 0000000001  | 1111111112 | 2222222223 | 3333333334 | 4444444445 | 5555555556 | 6666666667 | 7777777778 | 8888888889 | 9999999990 | 0000000001 | 1111111112 |
|                             | 1234567890 | 1234567890 | 1234567890 | 1234567890  | 1234567890 | 1234567890 | 1234567890 | 1234567890 | 1234567890 | 1234567890 | 1234567890 | 1234567890 | 1234567890 | 1234567890 | 1234567890 |
| Crocodylus_porosus_EU727191 | -----      | -----      | TGTGTCGC   | AAGTGTACA   | GTCCCA---  | GGCAGCAGCT | CTGCTGCAT  | CCCAGGGTCG | AGGGA---G  | ATGACCGTCG | CCACGCCCTC | CCACGCCCTC | CCACGCCCTC | CCACGCCCTC | CCACGCCCTC |
| Xenopus_laevis_X02995       | -----      | AGGTG      | GCCGGCC--- | GCCCCCGCGC  | GCG-GCTACA | GCCCCCCCC  | AGCAGCAGCA | CTCGCCGTCG | CCCGGGGCCG | AGGGA---G  | ACGCCGCCT  | CCGCG--GTC | CCGCG--GTC | CCGCG--GTC | CCGCG--GTC |
| Mus_musculus_NR_046233      | CTCAGGGCGC | GCCGAACC-- | ACCTCACCCC | GAGTGTACA   | GCCCTC--C  | GGCCGC-GCT | TTCGCCGAAT | CCCGGGGCCG | AGGAAGCCAG | ATACCCGTCG | CCGCGCTC   | CCGCGCTC   | CCGCGCTC   | CCGCGCTC   | CCGCGCTC   |
| Homo_sapiens_U13369         | GGCGGGGGCG | GCGGGACCGA | AACCCCCCC  | GAGTGTACA   | GCCCC--CC  | GGCAGCAGCA | CTCGCCGAAT | CCCGGGGCCG | AGGGAGC--G | AGACCCGTCG | CCGCGCTC   | CCGCGCTC   | CCGCGCTC   | CCGCGCTC   | CCGCGCTC   |
| Rattus_norvegicus_NR_046239 | ACCCGTGGCG | GCCGGACC-- | ACCCGCCCCC | GAGTGTACA   | GCCCC--C-  | GGCAGCAGCA | CTCGCCGAAT | CCCGGGGCCG | AGGGAGCCG  | ATACCCGTCG | CCGCGCTC   | CCGCGCTC   | CCGCGCTC   | CCGCGCTC   | CCGCGCTC   |
| Gallus_gallus_KT445934.2    | -----      | G          | GCGCCGCGCG | AGCGGCGCC   | GGGTGTATA  | GCC--GCCG  | GGCCCGGATC | GTCGCCGAAT | CCCGGGGCCG | AGGAG---G  | AGGACCCCGC | CCGCGCTC   | CCGCGCTC   | CCGCGCTC   | CCGCGCTC   |
|                             |            |            |            |             |            |            |            |            |            |            |            |            |            |            |            |
|                             | 1111111111 | 1111111111 | 1111111111 | 1111111111  | 1111111111 | 1111111111 | 1111111111 | 1111111111 | 1111111111 | 1111111111 | 1111111111 | 1111111111 | 1111111111 | 1111111111 | 1111111111 |
|                             | 0000000000 | 0000000000 | 0000000000 | 0000000000  | 0000000000 | 0000000000 | 0000000000 | 0000000000 | 0000000000 | 0000000000 | 0000000000 | 0000000000 | 0000000000 | 0000000000 | 0000000000 |
|                             | 7777777777 | 7777777778 | 8888888889 | 8888888889  | 8888888889 | 8888888889 | 8888888889 | 8888888889 | 8888888889 | 8888888889 | 8888888889 | 8888888889 | 8888888889 | 8888888889 | 8888888889 |
|                             | 8888888889 | 9999999990 | 0000000001 | 1111111112  | 2222222223 | 3333333334 | 4444444445 | 5555555556 | 6666666667 | 7777777778 | 8888888889 | 9999999990 | 0000000001 | 1111111112 | 2222222223 |
|                             | 1234567890 | 1234567890 | 1234567890 | 1234567890  | 1234567890 | 1234567890 | 1234567890 | 1234567890 | 1234567890 | 1234567890 | 1234567890 | 1234567890 | 1234567890 | 1234567890 | 1234567890 |
| Crocodylus_porosus_EU727191 | CCCCATGGCT | C---CCCGTC | CCTC-----  | CTCCTCATGG  | TGG-----   | -----      | -----      | -----      | -----      | -----      | -----      | -----      | -----      | -----      | -----      |
| Xenopus_laevis_X02995       | CTCCTCCCCG | GAGCGCGTCC | CGCCGCTC-- | CCCCCGGGG   | GGGCG----  | -----GCGC  | GCGGGCGGG  | GAA-----   | --GGGGAAG  | GGGCCCCC   | CTCCCGCGC  | CTCCCGCGC  | CTCCCGCGC  | CTCCCGCGC  | CTCCCGCGC  |
| Mus_musculus_NR_046233      | CCTCTCCCC- | ----CCGTCC | GCCT-----  | ---CCCGGGC  | GGG-----   | -----      | ---CGTGGG  | GT-----    | --GGGGCCG  | GGCCGCCCT  | CCACGGCGC  | CCACGGCGC  | CCACGGCGC  | CCACGGCGC  | CCACGGCGC  |
| Homo_sapiens_U13369         | CCCCCTCCCG | GCGCCACCC  | CCGCGGGAA  | TCCCCCGCA   | GGGGGGTCT  | CCCCCGGGG  | GCGCGCGCG  | GTCTCCTCGT | GGGGGGCCG  | GGCCACCCCT | CCACGGCGC  | CCACGGCGC  | CCACGGCGC  | CCACGGCGC  | CCACGGCGC  |
| Rattus_norvegicus_NR_046239 | CCCCGGGCT  | CTCCCCCTCC | GCCC-----  | CTCCCCGTGG  | GGTGG----  | ---CGAAAG  | GGGGCGGGT  | GC-----    | --GGGGCCG  | GGCCGCCCT  | CCACGGCGC  | CCACGGCGC  | CCACGGCGC  | CCACGGCGC  | CCACGGCGC  |
| Gallus_gallus_KT445934.2    | CCCCGGAGGG | GGCGGCCCC  | CGGAGGGCCC | CCC CGGGCCG | GACCGCGTC  | GGCCCGGGC  | CGCCGCGCG  | GCGTCCGCGC | CGCCGCCGTA | CGCCGCCGCT | CGTCTCTCT  | CGTCTCTCT  | CGTCTCTCT  | CGTCTCTCT  | CGTCTCTCT  |
|                             |            |            |            |             |            |            |            |            |            |            |            |            |            |            |            |
|                             | 1111111111 | 1111111111 | 1111111111 | 1111111111  | 1111111111 | 1111111111 | 1111111111 | 1111111111 | 1111111111 | 1111111111 | 1111111111 | 1111111111 | 1111111111 | 1111111111 | 1111111111 |
|                             | 0000000000 | 0000000000 | 0000000000 | 0000000000  | 0000000000 | 0000000000 | 0000000000 | 0000000000 | 0000000000 | 0000000000 | 0000000000 | 0000000000 | 0000000000 | 0000000000 | 0000000000 |
|                             | 8888888889 | 9999999999 | 9999999999 | 9999999999  | 9999999999 | 9999999999 | 9999999999 | 9999999999 | 9999999999 | 9999999999 | 9999999999 | 9999999999 | 9999999999 | 9999999999 | 9999999999 |
|                             | 9999999999 | 0000000001 | 1111111112 | 2222222223  | 3333333334 | 4444444445 | 5555555556 | 6666666667 | 7777777778 | 8888888889 | 9999999990 | 0000000001 | 1111111112 | 2222222223 | 3333333334 |
|                             | 1234567890 | 1234567890 | 1234567890 | 1234567890  | 1234567890 | 1234567890 | 1234567890 | 1234567890 | 1234567890 | 1234567890 | 1234567890 | 1234567890 | 1234567890 | 1234567890 | 1234567890 |
| Crocodylus_porosus_EU727191 | AACTGTCAAT | -----      | -----      | -----       | -----      | -----      | -----      | -----      | -----      | -----      | -----      | -----      | -----      | -----      | -----      |
| Xenopus_laevis_X02995       | GGCTGTCAAC | -----      | -----      | -----       | -----      | -----      | -----      | -----      | -----      | -----      | -----      | -----      | -----      | -----      | -----      |
| Mus_musculus_NR_046233      | GACCGCTCTC | CCACCC---  | -----CC    | TCCGTGCTC   | CTCTCGGGC  | CCGG-----  | -----T---  | -----      | -----      | -----      | -----      | -----      | -----      | -----      | -----      |
| Homo_sapiens_U13369         | GACCGCTCTC | CCACCCCTCC | TCCCCGCGCC | CCCGCCCGG   | CGACGGGGG  | GGTGCCTCGC | GCGGGTC--- | -----      | -----      | -----      | -----      | -----      | -----      | -----      | -----      |
| Rattus_norvegicus_NR_046239 | GACCGCTCTC | CCACCCCGG  | TC-----GCC | TCCGTGCTC   | CTCTCGGGG  | TCCG-----  | GGGGCC---  | -----      | -----      | -----      | -----      | -----      | -----      | -----      | -----      |
| Gallus_gallus_KT445934.2    | CCGTTCCCCG | CCCCGG-GTC | CGTCCCGGG  | CGCGGGGGC   | GGGGGGTCT  | --GGGTGTC  | GGCGCGGGC  | TGCGCGGGC  | GCCGCGGTG  | TGGCGCGGC  | CTCCAGCCG  | CTCCAGCCG  | CTCCAGCCG  | CTCCAGCCG  | CTCCAGCCG  |

1111111111 1111111111 1111111111 1111111111 1111111111 1111111111 1111111111 1111111111 1111111111 1111111111 1111111111  
 1111111111 1111111111 1111111111 1111111111 1111111111 1111111111 1111111111 1111111111 1111111111 1111111111 1111111111  
 0000000000 0000000000 0000000000 0000000000 0000000000 0000000000 0000000000 0000000000 0000000000 0000000001 1111111111  
 0000000001 1111111112 2222222223 3333333334 4444444445 5555555556 6666666667 7777777778 8888888889 9999999990 0000000001  
 1234567890 1234567890 1234567890 1234567890 1234567890 1234567890 1234567890 1234567890 1234567890 1234567890 1234567890  
 Crocodylus\_porosus\_EU727191  
 Xenopus\_laevis\_X02995  
 Mus\_musculus\_NR\_046233  
 Homo\_sapiens\_U13369  
 Rattus\_norvegicus\_NR\_046239  
 Gallus\_gallus\_KT445934.2  
 GCGCGGCGA GGCCGCGGG GGCCCGGGG GGGAACCTTC CCCCTTCTGT TCGGGCCGCC TCCGTTCCCG CGGGGGCGGC CCGTTCCGGG GACGGGCCCG CCGGCCCCCG  
  
 1111111111 1111111111 1111111111 1111111111 1111111111 1111111111 1111111111 1111111111 1111111111 1111111111 1111111111  
 1111111111 1111111111 1111111111 1111111111 1111111111 1111111111 1111111111 1111111111 1111111111 1111111111 1111111111  
 1111111111 1111111111 1111111111 1111111111 1111111111 1111111111 1111111111 1111111111 1111111112 2222222222 2222222222  
 1111111112 2222222223 3333333334 4444444445 5555555556 6666666667 7777777778 8888888889 9999999990 0000000001 1111111112  
 1234567890 1234567890 1234567890 1234567890 1234567890 1234567890 1234567890 1234567890 1234567890 1234567890 1234567890  
 Crocodylus\_porosus\_EU727191  
 Xenopus\_laevis\_X02995  
 Mus\_musculus\_NR\_046233  
 Homo\_sapiens\_U13369  
 Rattus\_norvegicus\_NR\_046239  
 Gallus\_gallus\_KT445934.2  
 -----CAGGG CGGACTGTTTTC TCAGTATGCT CCGACCGT-G TCGTGCTGCT GGCAGGGAG GG----- --CC-----  
 -----CGGGG CGGACTGCC CAGTGCGCC CCGTCCGC-G CCGCGCCGCC GAGGCGGGAG GG----- --CC-----  
 -----G GGGGCGGGG CGGACTGTCC CAGTGCGCC CCGGGCGTCC TCGCGCCGTC GGTCCCGGG GGG----- --ACCGTC GGTCACGCGT CTC-----  
 -----G GGGGCGGGG CGGACTGTCC CAGTGCGCC CCGGGCGG-G TCGCGCCGTC GGGCCCGGG GAG--GTTCT CT-CGGGGCC ACGCGCGCGT CCCCCGAAGA  
 -----G GGGGCGGGG CGGACTGTCC CAGTGCGCC CCGGGCGTCC TCGCGCCGTC GGGCCCGGG GGGCCCGTCT CA-CGCGCT FCCCTCCCT TCTC-GGGGT  
 GCGCCGCTGT CCGACCGGGG CGGACTGCC CAGTGCGCC CCGACCGT-G CCGCGCCGCC GGGCCCGG-- --CC-----  
  
 1111111111 1111111111 1111111111 1111111111 1111111111 1111111111 1111111111 1111111111 1111111111 1111111111 1111111111  
 1111111111 1111111111 1111111111 1111111111 1111111111 1111111111 1111111111 1111111111 1111111111 1111111111 1111111111  
 2222222222 2222222222 2222222222 2222222222 2222222222 2222222222 2222222222 2222222222 3333333333 3333333333 3333333333  
 2222222223 3333333334 4444444445 5555555556 6666666667 7777777778 8888888889 9999999990 0000000001 1111111112 2222222223  
 1234567890 1234567890 1234567890 1234567890 1234567890 1234567890 1234567890 1234567890 1234567890 1234567890 1234567890  
 Crocodylus\_porosus\_EU727191  
 Xenopus\_laevis\_X02995  
 Mus\_musculus\_NR\_046233  
 Homo\_sapiens\_U13369  
 Rattus\_norvegicus\_NR\_046239  
 Gallus\_gallus\_KT445934.2  
 -ATGCTGGGC ACCTGGGGTC TGCAGCGATG TTGGCTGCC ACCCAACCCG TCTTGAAACA CGGACCAAGG AGTCTAACAT GTGTCAAGT CAG-AGGCTC  
 -----GAGC CGCCAGGGTC CGCGGCGATG TCGGTGTCCC ACCCGACCCG TCTTGAAACA CGGACCAAGG AGTCTAACGC GCGCGCGAGT CGGAGGGACT  
 -----CGAC GAAGCCGAGC GCACGGGGTC GCGCGCGATG TCGGTACCC ACCCGACCCG TCTTGAAACA CGGACCAAGG AGTCTAACGC GTGCAGGAGT CAG-GGGCTC  
 GGGGGACGCG GGAGC-GAGC GCACGGGGTC GCGCGCGAGC TCGGTACCC ACCCGACCCG TCTTGAAACA CGGACCAAGG AGTCTAACAC GTGCAGGAGT CCG-GGGCTC  
 GGGGGGAGC GAAGCCGAGC GCACGGGGTC GCGCGCGATG TCGGTACCC ACCCGACCCG TCTTGAAACA CGGACCAAGG AGTCTAACGC GTGCAGGAGT CAG-GGGCTC  
 --CTCGGCC ACGCCAGGGC GCCCGGGTC CCGCGCGAGC TCGGTACCC ACCCGACCCG TCTTGAAACA CGGACCAAGG AGTCTAGCAC GCGCGCGAGT CCG-GGGCTC  
  
 1111111111 1111111111 1111111111 1111111111 1111111111 1111111111 1111111111 1111111111 1111111111 1111111111 1111111111  
 1111111111 1111111111 1111111111 1111111111 1111111111 1111111111 1111111111 1111111111 1111111111 1111111111 1111111111  
 3333333333 3333333333 3333333333 3333333333 3333333333 3333333333 3333333334 4444444444 4444444444 4444444444 4444444444  
 3333333334 4444444445 5555555556 6666666667 7777777778 8888888889 9999999990 0000000001 1111111112 2222222223 3333333334  
 1234567890 1234567890 1234567890 1234567890 1234567890 1234567890 1234567890 1234567890 1234567890 1234567890 1234567890  
 Crocodylus\_porosus\_EU727191  
 Xenopus\_laevis\_X02995  
 Mus\_musculus\_NR\_046233  
 Homo\_sapiens\_U13369  
 Rattus\_norvegicus\_NR\_046239  
 Gallus\_gallus\_KT445934.2  
 GAACGAAAGC C--CATGACG CAATGAAGGT GAGGGTCGGT GAGCAC--CA GCT--GAGGT GGGATCCCGA GGCCACTGT--TTGC AGAGGGCG--  
 CTGCAGAAA CCCTGTGGCG CAATGAAGGT GAGGGCCGGG GCGCCC--CG GCT--GAGGT GGGATCCCGC CGCCCTCC CCGGCCCCCG GGGGGGCGG GGGGGGCGG  
 GTCCGAAAAGC CGCCGTGGCG CAATGAAGGT GAAGGGCCCG G--CCCAGGGT GCC--GAGGT GGGATCCCGA GGCCCTCC--AGTCCCG CGAGGGCG--  
 GCACGAAAGC CGCCGTGGCG CAATGAAGGT GAAGGGCCCG GCGCTCGCCG GCC--GAGGT GGGATCCCGA GGCCCTCC--AGTCCCG CGAGGGCG--  
 GTCCGAAAAGC CGCCGTGGCG CAATGAAGGT GAAGGGCCCG GTTCCCGGGG GCCCGAGGT GGGATCCCGA GGCCCTCC--AGTCCCG CGAGGGCG--  
 GCGGAAAAGC C--CGCGCCG CAATGAAGGT GAGGGCCCGG GCGCC--CG GCT--GAGGT GGGATCCCGG GGCGGCAGGC--CGAAGGC CCGGGGCG--

1111111111 1111111111 1111111111 1111111111 1111111111 1111111111 1111111111 1111111111 1111111111 1111111111 1111111111 1111111111  
1111111111 1111111111 1111111111 1111111111 1111111111 1111111111 1111111111 1111111111 1111111111 1111111111 1111111111 1111111111  
4444444444 4444444444 4444444444 4444444444 4444444444 4444444445 5555555555 5555555555 5555555555 5555555555 5555555555 5555555555  
4444444445 5555555556 6666666667 7777777778 8888888889 9999999990 0000000001 1111111112 2222222223 3333333334 4444444445  
1234567890 1234567890 1234567890 1234567890 1234567890 1234567890 1234567890 1234567890 1234567890 1234567890 1234567890 1234567890  
Crocodylus\_porosus\_EU727191 -----CA CCACTGACCT GTCTCGCCCA CCCCCTCAGG GAGGCGGAGC GTGAGCATAAC GTG-CTAGGA CCTGAAAAGAT GGTGAACTAT GCCTAGGAAG GGCAAAGCCA  
Xenopus\_laevis\_X02995 CGGCGGGCCA CCACCGGCC GTCTCGCCC CGCCGTCGGG G-GGTGG-GC GTGAGCGCGC GCGATTAGGA CCCGAAAGAT GGTGAACTAT GCCTGGGCAG G-CGAAGCCA  
Mus\_musculus\_NR\_046233 -----CA CCACCGGCC GTCTCGCCC CGCCGTCGGG GAGGTGGAGC ACAGAGCGTAC GCG-TTAGGA CCCGAAAGAT GGTGAACTAT GCCTGGGCAG GGCGAAGCCA  
Homo\_sapiens\_U13369 -----CA CCACCGGCC GTCTCGCCC CGCCGTCGGG GAGGTGGAGC ACAGAGCGCAC GTG-TTAGGA CCCGAAAGAT GGTGAACTAT GCCTGGGCAG GGCGAAGCCA  
Rattus\_norvegicus\_NR\_046239 -----CA CCACCGGCC GTCTCGCCC CGCCGTCGGG GAGGTGGAGC ACAGAGCGTAC GCG-TTAGGA CCCGAAAGAT GGTGAACTAT GCCTGGGCAG GGCGAAGC-A  
Gallus\_gallus\_KT445934.2 -----CA CCACCGGCC GTCTCGCCC CCTCGCCGGG GAGGTGGAGC ATGAGCGCGC GTG-CTAGGA CCCGAAAGAT GGTGAACTAT GCCTGGGCAG GGCGAAGCCA  
  
1111111111 1111111111 1111111111 1111111111 1111111111 1111111111 1111111111 1111111111 1111111111 1111111111 1111111111 1111111111  
1111111111 1111111111 1111111111 1111111111 1111111111 1111111111 1111111111 1111111111 1111111111 1111111111 1111111111 1111111111  
5555555555 5555555555 5555555555 5555555555 5555555556 6666666666 6666666666 6666666666 6666666666 6666666666 6666666666 6666666666  
5555555556 6666666667 7777777778 8888888889 9999999990 0000000001 1111111112 2222222223 3333333334 4444444445 5555555556 6666666667  
1234567890 1234567890 1234567890 1234567890 1234567890 1234567890 1234567890 1234567890 1234567890 1234567890 1234567890 1234567890  
Crocodylus\_porosus\_EU727191 AAGGAAACTC TGGTGGAGGT CCATAGCAGT ACTGACATGC AAATCGGTCA TCTGACTGG GTATAGGGGC GAAAGACTAA TTGAATCATC TAGTAGCTGG TTCCTC---  
Xenopus\_laevis\_X02995 GAGGAAACTC TGGTGGAGGT CCGTAGCAGT CCTGACGTGC AAATCGGTTC TCCGACTGG -TATAGGGGC GAAAGACTAA TCGAACCATC TAGTAGCTGG TTCCTC---  
Mus\_musculus\_NR\_046233 GAGGAAACTC TGGTGGAGGT CCGTAGCAGT CCTGACGTGC AAATCGGTTC TCCGACTGG GTATAGGGGC GAAAGACTAA TCGAACCATC TAGTAGCTGG TTCCTC---  
Homo\_sapiens\_U13369 GAGGAAACTC TGGTGGAGGT CCGTAGCAGT CCTGACGTGC AAATCGGTTC TCCGACTGG GTATAGGGGC GAAAGACTAA TCGAACCATC TAGTAGCTGG TTCCTC---  
Rattus\_norvegicus\_NR\_046239 GAGGAAACTC TGGTGGAGGT CCGTAGCAGT CCTGACGTGC AAATCGGTTC TCCGACTGG GTATAGGGGC GAAAGACTAA TCGAACCATC TAGTAGCTGG TTCCTC---  
Gallus\_gallus\_KT445934.2 GAGGAAACTC TGGTGGAGGT CCGTAGCAGT CCTGACGTGC AAATCGGTTC TCCGACTGG GTATAGGGGC GAAAGACTAA TCGAACCATC TAGTAGCTGG TTCCTC---  
  
1111111111 1111111111 1111111111 1111111111 1111111111 1111111111 1111111111 1111111111 1111111111 1111111111 1111111111 1111111111  
1111111111 1111111111 1111111111 1111111111 1111111111 1111111111 1111111111 1111111111 1111111111 1111111111 1111111111 1111111111  
6666666666 6666666666 6666666666 6666666667 7777777777 7777777777 7777777777 7777777777 7777777777 7777777777 7777777777 7777777777  
6666666667 7777777778 8888888889 9999999990 0000000001 1111111112 2222222223 3333333334 4444444445 5555555556 6666666667 7777777778  
1234567890 1234567890 1234567890 1234567890 1234567890 1234567890 1234567890 1234567890 1234567890 1234567890 1234567890 1234567890  
Crocodylus\_porosus\_EU727191 -----AGGATAGCTG GCACCTACC- -----CA T-----CT CCGCAGTTTT ATTTGTTAAA GTGAATGATT AGAGGTCTTG GGGCCAAA- CAATCTCAAC  
Xenopus\_laevis\_X02995 AGTTTCCCTC AGGATAGCTG GCGCTCTCG- -----CG T-----CG -CGCAGTTTT ATCCGGTAAA GCGAATGATT AGAGGTCTTG GGGCCGAAAT CGATCTCAAC  
Mus\_musculus\_NR\_046233 AGTTTCCCTC AGGATAGCTG GCGCTCTCG- -----CT C-CCGACG-T ACGCAGTTTT ATCCGGTAAA GCGAATGATT AGAGGTCTTG GGGCCGAAA- CGATCTCAAC  
Homo\_sapiens\_U13369 AGTTTCCCTC AGGATAGCTG GCGCTCTCGC AGACCCGACG CACCCCGGCC ACGCAGTTTT ATCCGGTAAA GCGAATGATT AGAGGTCTTG GGGCCGAAA- CGATCTCAAC  
Rattus\_norvegicus\_NR\_046239 AGTTTCCCTC AGGATAGCTG GCGCTCTCGC AACGCGTTCG C-TCGACAAC CCGCAGTTTT ATCCGGTAAA GCGAATGATT AGAGGTCTTG GGGCCGAAA- CGATCTCAAC  
Gallus\_gallus\_KT445934.2 AGTTTCCCTC AGGATAGCTG GCGCTCGGG- -----G C-----GGCG GTGCAGTTTT ACCCGGTAAA GCGAATGATT AGAGGTCTTG GGGCCGAAA- CGATCTCAAC  
  
1111111111 1111111111 1111111111 1111111111 1111111111 1111111111 1111111111 1111111111 1111111111 1111111111 1111111111 1111111111  
1111111111 1111111111 1111111111 1111111111 1111111111 1111111111 1111111111 1111111111 1111111111 1111111111 1111111111 1111111111  
7777777777 7777777777 7777777778 8888888888 8888888888 8888888888 8888888888 8888888888 8888888888 8888888888 8888888888 8888888888  
7777777778 8888888889 9999999990 0000000001 1111111112 2222222223 3333333334 4444444445 5555555556 6666666667 7777777778 8888888889  
1234567890 1234567890 1234567890 1234567890 1234567890 1234567890 1234567890 1234567890 1234567890 1234567890 1234567890 1234567890  
Crocodylus\_porosus\_EU727191 CCAATTCTCAA ACTTTAAATG GGTAAAGAAGC CTGGCTCAGT GGTGTGGAGC CTGG-TGTGG AATGCGA-GT GCC-TAGTGG GCCACTTTGT GTAAGCGGAG CTGGTGCTGC  
Xenopus\_laevis\_X02995 CTATTCTCAA ACTTTAAATG GGTAAAGAAGC CCGGCTCGCT GGCTTGGAGC CGGGCGTGG AATGCGGAC GCCATAGTGG GCCACTTTTG GTAAGCAGAA CTGGCGCTGC  
Mus\_musculus\_NR\_046233 CTATTCTCAA ACTTTAAATG GGTAAAGAAGC CCGGCTCGCT GGCGTGGAGC CGGG-CGTGG AATGCGA-GT GCC-TAGTGG GCCACTTTTG GTAAGCAGAA CTGGCGCTGC  
Homo\_sapiens\_U13369 CTATTCTCAA ACTTTAAATG GGTAAAGAAGC CCGGCTCGCT GGCGTGGAGC CGGG-CGTGG AATGCGA-GT GCC-TAGTGG GCCACTTTTG GTAAGCAGAA CTGGCGCTGC  
Rattus\_norvegicus\_NR\_046239 CTATTCTCAA ACTTTAAATG GGTAAAGAAGC CCGGCTCGCT GGCGTGGAGC CGGG-CGTGG A-TGCGA-GT GCC-TAGTGG GCCACTTTTG GTAAGCAGAA CTGGCGCTGC  
Gallus\_gallus\_KT445934.2 CTATTCTCAA ACTTTCAATG GGTAAAGACG CCGGCTCGCT GGCGTGGAGC CGGGCCGTGG AATGCGA-GC GCT-CAGTGG GCCACTTTTG GTAAGCAGAA CTGGCGCTGC

```
1111111111 1111111111 1111111111 1111111111 1111111111 1111111111 1111111111 1111111111 1111111111 1111111111 1111111111 1111111111
1111111111 1111111111 1111111111 1111111111 1111111111 1111111111 1111111111 1111111111 1111111111 1111111111 1111111111 1111111111
8888888888 8888888889 9999999999 9999999999 9999999999 9999999999 9999999999 9999999999 9999999999 9999999999 9999999999 9999999999
88888888889 9999999990 0000000001 1111111112 2222222223 3333333334 4444444445 5555555556 6666666667 7777777778 8888888889 8888888889
1234567890 1234567890 1234567890 1234567890 1234567890 1234567890 1234567890 1234567890 1234567890 1234567890 1234567890 1234567890
Crocodylus_porosus_EU727191 GGAATGAACT GAATGCCGAG TTAAGGTGCT CAATGCTGAC GCTCATCAGA CCCAGAAAAA GGTGTTGGTT GATATAGACC TCAGGACGGT GGCCATGGAA GTTGGAACTCT
Xenopus_laevis_X02995 GGGATGAACC GAACGCCGGG TTAAGGCGCC CGATGCCGAC GCTCATCAGA CCCAGAAAAA GGTGTTGGTT GATATAGACA GCAGGACGGT GGCCATGGAA GTCGGAATCC
Mus_musculus_NR_046233 GGGATGAACC GAACGCCGGG TTAAGGCGCC CGATGCCGAC GCTCATCAGA CCCAGAAAAA GGTGTTGGTT GATATAGACA GCAGGACGGT GGCCATGGAA GTCGGAATCC
Homo_sapiens_U13369 GGGATGAACC GAACGCCGGG TTAAGGCGCC CGATGCCGAC GCTCATCAGA CCCAGAAAAA GGTGTTGGTT GATATAGACA GCAGGACGGT GGCCATGGAA GTCGGAATCC
Rattus_norvegicus_NR_046239 GGGATGAACC GAACGCCGGG TTAAGGCGCC CGATGCCGAC GCTCATCAGA CCCAGAAAAA GGTGTTGGTT GATATAGACA GCAGGACGGT GGCCATGGAA GTCGGAATCC
Gallus_gallus_KT445934.2 GGGATGAACC GAACGCCGGG TTAAGGCGCC CGATGCCGAC GCTCATCAGA CCCAGAAAAA GGTGTTGGTT GATCTAGACA GCAGGACGGT GGCCATGGAA GTCGGAATCC
```

```
1111111111 1111111111 1111111111 1111111111 1111111111 1111111111 1111111111 1111111111 1111111111 1111111111 1111111111 1111111111
1111111112 2222222222 2222222222 2222222222 2222222222 2222222222 2222222222 2222222222 2222222222 2222222222 2222222222 2222222222
9999999990 0000000000 0000000000 0000000000 0000000000 0000000000 0000000000 0000000000 0000000000 0000000000 0000000000 0000000001
9999999990 0000000001 1111111112 2222222223 3333333334 4444444445 5555555556 6666666667 7777777778 8888888889 9999999990 9999999990
1234567890 1234567890 1234567890 1234567890 1234567890 1234567890 1234567890 1234567890 1234567890 1234567890 1234567890 1234567890
Crocodylus_porosus_EU727191 GCTAAAGAGT GTGTAACAAC TCACCTGCCA AATCAACTAG CCCTGAAAAT GGATGGCGCT GGAGCGTCGG GCCCATAACC GGCCGTCGCC G-----
Xenopus_laevis_X02995 GCTAAGGAGT GTGTAACAAC TCACCTGCCG AATCAACTAG CCCTGAAAAT GGATGGCGCT GGAGCGTCGG GCCCATAACC GGCCGTCGCC G-CAGTCGGA ACGGAACGGG
Mus_musculus_NR_046233 GCTAAGGAGT GTGTAACAAC TCACCTGCCG AATCAACTAG CCCTGAAAAT GGATGGCGCT GGAGCGTCGG GCCCATAACC GGCCGTCGCC GGCACTCGAG AGTGGACGGG
Homo_sapiens_U13369 GCTAAGGAGT GTGTAACAAC TCACCTGCCG AATCAACTAG CCCTGAAAAT GGATGGCGCT GGAGCGTCGG GCCCATAACC GGCCGTCGCC GGCAGTCGGA ACGG----G
Rattus_norvegicus_NR_046239 GCTAAGGAGT GTGTAACAAC TCACCTGCCG AATCAACTAG CCCTGAAAAT GGATGGCGCT GGAGCGTCGG GCCCATAACC GGCCGTCGCC GGCAGTCGGA ACGG----G
Gallus_gallus_KT445934.2 GCTAAGGAGT GTGTAACAAC TCACCTGCCG AATCAACTAG CCCTGAAAAT GGATGGCGCT GGAGCGTCGG GCCCATAACC GGCCGTCGCC G-----
```

```
1111111111 1111111111 1111111111 1111111111 1111111111 1111111111 1111111111 1111111111 1111111111 1111111111 1111111111 1111111111
2222222222 2222222222 2222222222 2222222222 2222222222 2222222222 2222222222 2222222222 2222222222 2222222222 2222222222 2222222222
1111111111 1111111111 1111111111 1111111111 1111111111 1111111111 1111111111 1111111111 1111111111 1111111111 1111111112 2222222222
0000000001 1111111112 2222222223 3333333334 4444444445 5555555556 6666666667 7777777778 8888888889 9999999990 0000000001 1111111112
1234567890 1234567890 1234567890 1234567890 1234567890 1234567890 1234567890 1234567890 1234567890 1234567890 1234567890 1234567890
Crocodylus_porosus_EU727191 -----
Xenopus_laevis_X02995 -----
Mus_musculus_NR_046233 A----CGGGA GCGGC-CGCG GGTGCGCGTC TCTCGGG--- GTCGGGGGTG CGTGGCGGGG GC----- -----CC GTCCC----- -----CCGCC
Homo_sapiens_U13369 AGCGGC GCGGC-CGCG CGCGCGCGCG TGTGTTGTGC GTCGGAGGGC GGCGGCGCGC GCGGCGCGCG GGGTGTGGGG TCC'TCCCCC GCCCCCCCCC CCACGCCTCC
Rattus_norvegicus_NR_046239 A----CGGGA GCGGC-CGCG GGCGCGCGAC CCCGGGG--- GCCGGGCGGC GTCGGGTTTC GC----- -----CG G----- -----CCGCC
Gallus_gallus_KT445934.2 -----
```

```
1111111111 1111111111 1111111111 1111111111 1111111111 1111111111 1111111111 1111111111 1111111111 1111111111 1111111111 1111111111
2222222222 2222222222 2222222222 2222222222 2222222222 2222222222 2222222222 2222222222 2222222222 2222222222 2222222222 2222222222
2222222222 2222222222 2222222222 2222222222 2222222222 2222222222 2222222222 2222222222 2222222222 2222222223 3333333333 3333333333
1111111112 2222222223 3333333334 4444444445 5555555556 6666666667 7777777778 8888888889 9999999990 0000000001 1111111112 1111111112
1234567890 1234567890 1234567890 1234567890 1234567890 1234567890 1234567890 1234567890 1234567890 1234567890 1234567890 1234567890
Crocodylus_porosus_EU727191 -----GA AATGAGAG-- --CATGGGG GCTAGGCTGT GAT-GAGTAG GAGGGCCTCT GTGCTGGGCC TTGAAGCCTA GGGCACGGGC
Xenopus_laevis_X02995 -----GCGC TGGGTCAG-- -TCGCGGGG GCTAGGCCGC GACTGAGTAG GAGGGCCCG CCGGTTGGCG CGGAAGCGC- GCGCGAGGGC
Mus_musculus_NR_046233 TCCCTCCGC GCGCCGG-GT TCGCCCCCGC GCGCTCGG-G CCCCAGCCGC CCTACGCCGC GAC-GAGTAG GAGGGCCGCT CCGGTGAGCC TTGAAGCCTA GGGCGCGGGC
Homo_sapiens_U13369 TCCCTCCTC CCGCCCACGC CCCGCTCCCC GCCCCGGAG CCCCAGCCGC GCTACGCCGC GAC-GAGTAG GAGGGCCGCT CCGGTGAGCC TTGAAGCCTA GGGCGCGGGC
Rattus_norvegicus_NR_046239 GCCGTCCAC CCCCAGCG-GC TC-CCCCCGC GCGCTCGG-G CCCCAGCCGC CCTACGCCGC GAC-GAGTAG GAGGGCCGCT CCGGTGAGCC TTGAAGCCTA GGGCGCGGGC
Gallus_gallus_KT445934.2 -----GC GGTGCGGA-- -GCCCGGGG GCTACGCCGC GAC-GAGTAG GAGGGCCGCT CCGGTGAGCC TTGAAGCCTA GGGCGCGGGC
```







|                             |            |            |            |            |            |            |            |            |            |            |            |            |            |            |            |            |
|-----------------------------|------------|------------|------------|------------|------------|------------|------------|------------|------------|------------|------------|------------|------------|------------|------------|------------|
|                             | 1111111111 | 1111111111 | 1111111111 | 1111111111 | 1111111111 | 1111111111 | 1111111111 | 1111111111 | 1111111111 | 1111111111 | 1111111111 | 1111111111 | 1111111111 | 1111111111 | 1111111111 | 1111111111 |
|                             | 3333333333 | 3333333333 | 3333333333 | 3333333333 | 3333333333 | 3333333333 | 3333333333 | 3333333333 | 3333333333 | 3333333333 | 3333333333 | 3333333333 | 3333333333 | 3333333333 | 3333333333 | 3333333333 |
|                             | 2222222222 | 2222222222 | 2222222222 | 2222222222 | 2222222222 | 2222222222 | 2222222222 | 2222222222 | 2222222222 | 2222222222 | 2222222222 | 2222222222 | 2222222222 | 2222222222 | 2222222222 | 2222222222 |
|                             | 0000000001 | 1111111112 | 2222222223 | 3333333334 | 4444444445 | 5555555556 | 6666666667 | 7777777778 | 8888888889 | 9999999990 | 0000000001 | 1111111112 | 2222222223 | 3333333334 | 4444444445 | 5555555556 |
| Crocodylus_porosus_EU727191 | -----      | -----      | -----      | -----      | -----      | -----      | -----      | -----      | -----      | -----      | -----      | -----      | -----      | -----      | -----      | -----      |
| Xenopus_laevis_X02995       | -----      | -----      | -----      | -----      | -----      | -----      | -----      | -----      | -----      | -----      | -----      | -----      | -----      | -----      | -----      | -----      |
| Mus_musculus_NR_046233      | CCGCGGGGGT | TCCGGAGCGG | GAGGAACCCG | CGG-TCCCGG | GTGGGGCGGG | GGGCCCGGAC | ACTCGGGGGG | --CCGCGCGG | GGCGGCGACT | CTGGATGCAA | TCCGGGCCCT | -----      | -----      | -----      | -----      | -----      |
| Homo_sapiens_U13369         | CGGCGGCCG- | -CCGGGGCGG | CCGGCGGGGG | CAGGTCCCGG | CGAGGG--G  | GGCCCCGGGG | ACCCGGGGGG | --CCGGCGGC | GGCGGCGACT | CTGGACGCGA | GCCGGGCCCT | -----      | -----      | -----      | -----      | -----      |
| Rattus_norvegicus_NR_046239 | CCGCGCGGG- | -CCGGAGCGG | GGGGAACCCG | CGGGCCCCCG | GTGGGG--GG | GGGCCCGGAC | ACCCGGGGGG | GACCGGCGGC | GGCGGCGACT | CTGGACGCGA | GCCGGGCCCT | -----      | -----      | -----      | -----      | -----      |
| Gallus_gallus_KT445934.2    | -----      | -----      | -----      | -----      | -----      | -----      | -----      | -----      | -----      | -----      | -----      | -----      | -----      | -----      | -----      | -----      |

|                             |            |            |            |            |            |            |            |            |            |            |            |            |            |            |            |            |
|-----------------------------|------------|------------|------------|------------|------------|------------|------------|------------|------------|------------|------------|------------|------------|------------|------------|------------|
|                             | 1111111111 | 1111111111 | 1111111111 | 1111111111 | 1111111111 | 1111111111 | 1111111111 | 1111111111 | 1111111111 | 1111111111 | 1111111111 | 1111111111 | 1111111111 | 1111111111 | 1111111111 | 1111111111 |
|                             | 3333333333 | 3333333333 | 3333333333 | 3333333333 | 3333333333 | 3333333333 | 3333333333 | 3333333333 | 3333333333 | 3333333333 | 3333333333 | 3333333333 | 3333333333 | 3333333333 | 3333333333 | 3333333333 |
|                             | 3333333333 | 3333333333 | 3333333333 | 3333333333 | 3333333333 | 3333333333 | 3333333333 | 3333333333 | 3333333333 | 3333333333 | 3333333333 | 3333333333 | 3333333333 | 3333333333 | 3333333333 | 3333333333 |
|                             | 1111111112 | 2222222223 | 3333333334 | 4444444445 | 5555555556 | 6666666667 | 7777777778 | 8888888889 | 9999999990 | 0000000001 | 1111111112 | 2222222223 | 3333333334 | 4444444445 | 5555555556 | 6666666667 |
|                             | 1234567890 | 1234567890 | 1234567890 | 1234567890 | 1234567890 | 1234567890 | 1234567890 | 1234567890 | 1234567890 | 1234567890 | 1234567890 | 1234567890 | 1234567890 | 1234567890 | 1234567890 | 1234567890 |
| Crocodylus_porosus_EU727191 | TCCTGTGGAT | TGCCTCAGCT | GCAGCGGGCT | TCAC----CT | GCCTCT---- | -----      | -----      | -----      | -----      | -----      | -----      | -----      | -----      | -----      | -----      | -----      |
| Xenopus_laevis_X02995       | TCCTGTGGAT | CGCCCCAGCT | GCGGCGCGCG | -----CC    | TCTCCC---- | -----      | -----      | -----      | -----      | -----      | -----      | -----      | -----      | -----      | -----      | -----      |
| Mus_musculus_NR_046233      | TCCCGTGGAT | CGCCTCAGCT | GCGGCGGGCG | TCGC--GGCC | GCTCCCGGGG | AGCCCGGGCG | GTG--CCGGC | GCGGGTCCC- | -CTCCCCGCG | GGGCTCGCT  | CCACCCCC   | -----      | -----      | -----      | -----      | -----      |
| Homo_sapiens_U13369         | TCCCGTGGAT | CGCCCCAGCT | GCGGCGGGCG | TCGC--GGCC | GCCCCCGGGG | AGCCCGGGCG | -CGGCGGGC  | GCGCCCCCA  | CCCCACC    | ACGTCTCGGT | CGCGCGCGCG | -----      | -----      | -----      | -----      | -----      |
| Rattus_norvegicus_NR_046239 | TCCCGTGGAT | CGCCCCAGCT | GCGGCGGGCG | TCGC--GGCC | GCTCCCGGGG | AGCCCGGGCG | GTGCCCCGGC | GGGGTTTTC- | -CTCC----- | -GGCTCGCT  | CTCCCCCTT  | -----      | -----      | -----      | -----      | -----      |
| Gallus_gallus_KT445934.2    | TCCCGTGGAT | CGCCCCAGCT | GCGGCGGGCG | CCGCTCGGCG | CCCTCCGTTG | CCCTCCGCCC | CCCGCTTCCC | GGGCGCCCTC | CCGTGCGCG  | TCGTCCCGCG | CGCCCCCGT  | -----      | -----      | -----      | -----      | -----      |

|                             |            |            |            |            |            |            |            |            |            |            |            |            |            |            |            |            |
|-----------------------------|------------|------------|------------|------------|------------|------------|------------|------------|------------|------------|------------|------------|------------|------------|------------|------------|
|                             | 1111111111 | 1111111111 | 1111111111 | 1111111111 | 1111111111 | 1111111111 | 1111111111 | 1111111111 | 1111111111 | 1111111111 | 1111111111 | 1111111111 | 1111111111 | 1111111111 | 1111111111 | 1111111111 |
|                             | 3333333333 | 3333333333 | 3333333333 | 3333333333 | 3333333333 | 3333333333 | 3333333333 | 3333333333 | 3333333333 | 3333333333 | 3333333333 | 3333333333 | 3333333333 | 3333333333 | 3333333333 | 3333333333 |
|                             | 4444444444 | 4444444444 | 4444444444 | 4444444444 | 4444444444 | 4444444444 | 4444444444 | 4444444444 | 4444444444 | 4444444444 | 4444444444 | 4444444444 | 4444444444 | 4444444444 | 4444444444 | 4444444444 |
|                             | 2222222223 | 3333333334 | 4444444445 | 5555555556 | 6666666667 | 7777777778 | 8888888889 | 9999999990 | 0000000001 | 1111111112 | 2222222223 | 3333333334 | 4444444445 | 5555555556 | 6666666667 | 7777777778 |
|                             | 1234567890 | 1234567890 | 1234567890 | 1234567890 | 1234567890 | 1234567890 | 1234567890 | 1234567890 | 1234567890 | 1234567890 | 1234567890 | 1234567890 | 1234567890 | 1234567890 | 1234567890 | 1234567890 |
| Crocodylus_porosus_EU727191 | -----      | -----      | -----      | -----      | -----      | -----      | -----      | -----      | -----      | -----      | -----      | -----      | -----      | -----      | -----      | -----      |
| Xenopus_laevis_X02995       | A-----     | -----      | -----      | -----      | -----      | -----      | -----      | -----      | -----      | -----      | -----      | -----      | -----      | -----      | -----      | -----      |
| Mus_musculus_NR_046233      | ATCGCC---- | -----      | -----      | -----      | -----      | -----      | -----      | -----      | -----      | -----      | -----      | -----      | -----      | -----      | -----      | -----      |
| Homo_sapiens_U13369         | TCCGCTGGGG | GCGGGAGCGG | TCGGGCGGGC | GCGGTTCGGC | GGCGCGGGG  | CGGGGCGGTT | CGTCCCCCG  | CCCTACCC   | CCGGCCCCG  | CCGCCCCCG  | TTCCCCCTC  | -----      | -----      | -----      | -----      | -----      |
| Rattus_norvegicus_NR_046239 | -----      | -----      | -----      | -----      | -----      | -----      | -----      | -----      | -----      | -----      | -----      | -----      | -----      | -----      | -----      | -----      |
| Gallus_gallus_KT445934.2    | CCCGAGCG-- | -----      | -----      | -----      | -----      | -----      | -----      | -----      | -----      | -----      | -----      | -----      | -----      | -----      | -----      | -----      |

|                             |            |            |            |            |            |            |            |            |            |            |            |            |            |            |            |            |
|-----------------------------|------------|------------|------------|------------|------------|------------|------------|------------|------------|------------|------------|------------|------------|------------|------------|------------|
|                             | 1111111111 | 1111111111 | 1111111111 | 1111111111 | 1111111111 | 1111111111 | 1111111111 | 1111111111 | 1111111111 | 1111111111 | 1111111111 | 1111111111 | 1111111111 | 1111111111 | 1111111111 | 1111111111 |
|                             | 3333333333 | 3333333333 | 3333333333 | 3333333333 | 3333333333 | 3333333333 | 3333333333 | 3333333333 | 3333333333 | 3333333333 | 3333333333 | 3333333333 | 3333333333 | 3333333333 | 3333333333 | 3333333333 |
|                             | 5555555555 | 5555555555 | 5555555555 | 5555555555 | 5555555555 | 5555555555 | 5555555555 | 5555555555 | 5555555555 | 5555555555 | 5555555555 | 5555555555 | 5555555555 | 5555555555 | 5555555555 | 5555555555 |
|                             | 3333333334 | 4444444445 | 5555555556 | 6666666667 | 7777777778 | 8888888889 | 9999999990 | 0000000001 | 1111111112 | 2222222223 | 3333333334 | 4444444445 | 5555555556 | 6666666667 | 7777777778 | 8888888889 |
|                             | 1234567890 | 1234567890 | 1234567890 | 1234567890 | 1234567890 | 1234567890 | 1234567890 | 1234567890 | 1234567890 | 1234567890 | 1234567890 | 1234567890 | 1234567890 | 1234567890 | 1234567890 | 1234567890 |
| Crocodylus_porosus_EU727191 | -----      | -----      | -----      | -----      | -----      | -----      | -----      | -----      | -----      | -----      | -----      | -----      | -----      | -----      | -----      | -----      |
| Xenopus_laevis_X02995       | -----      | -----      | -----      | -----      | -----      | -----      | -----      | -----      | -----      | -----      | -----      | -----      | -----      | -----      | -----      | -----      |
| Mus_musculus_NR_046233      | -----      | -----      | -----      | -----      | -----      | -----      | -----      | -----      | -----      | -----      | -----      | -----      | -----      | -----      | -----      | -----      |
| Homo_sapiens_U13369         | CTCCTCGGCG | CGCGCGGGC  | GCGGCGGCG  | GCGGCGGAGG | GGCCCGGGC  | CGTCCCC    | CGCCGGTCC  | GCCCCCGGG  | CCGCGTTTT  | CCGCGGGCG  | CCCCCGCTC  | -----      | -----      | -----      | -----      | -----      |
| Rattus_norvegicus_NR_046239 | -----      | -----      | -----      | -----      | -----      | -----      | -----      | -----      | -----      | -----      | -----      | -----      | -----      | -----      | -----      | -----      |
| Gallus_gallus_KT445934.2    | -----      | -----      | -----      | -----      | -----      | -----      | -----      | -----      | -----      | -----      | -----      | -----      | -----      | -----      | -----      | -----      |

Crocodylus\_porosus\_EU727191  
Xenopus\_laevis\_X02995  
Mus\_musculus\_NR\_046233  
Homo\_sapiens\_U13369  
Rattus\_norvegicus\_NR\_046239  
Gallus\_gallus\_KT445934.2

|                             |            |            |            |            |            |             |            |            |            |            |            |            |            |            |
|-----------------------------|------------|------------|------------|------------|------------|-------------|------------|------------|------------|------------|------------|------------|------------|------------|
|                             | 1111111111 | 1111111111 | 1111111111 | 1111111111 | 1111111111 | 1111111111  | 1111111111 | 1111111111 | 1111111111 | 1111111111 | 1111111111 | 1111111111 | 1111111111 | 1111111111 |
|                             | 4444444444 | 4444444444 | 4444444444 | 4444444444 | 4444444444 | 4444444444  | 4444444444 | 4444444444 | 4444444444 | 4444444444 | 4444444444 | 4444444444 | 4444444444 | 4444444444 |
|                             | 0000000000 | 0000000001 | 1111111111 | 1111111111 | 1111111111 | 1111111111  | 1111111111 | 1111111111 | 1111111111 | 1111111111 | 1111111111 | 1111111111 | 1111111111 | 1111111111 |
|                             | 8888888889 | 9999999990 | 0000000001 | 1111111112 | 2222222223 | 3333333334  | 4444444445 | 5555555556 | 6666666667 | 7777777778 | 8888888889 | 9999999990 | 0000000001 | 1111111112 |
|                             | 1234567890 | 1234567890 | 1234567890 | 1234567890 | 1234567890 | 1234567890  | 1234567890 | 1234567890 | 1234567890 | 1234567890 | 1234567890 | 1234567890 | 1234567890 | 1234567890 |
| Crocodylus_porosus_EU727191 | AGGAATCTTG | CTGAAACTTG | TTGGTGCCTG | CAGTTGTCTG | GCAGGTGGGG | TGGGTGAAAC  | ATACTGGAAC | TGACAACCAG | GCAAGGGGGA | TAGCCCTCT  | TCTAGGGGTG |            |            |            |
| Xenopus_laevis_X02995       | -----      | -----      | -----      | -----      | -----      | -----       | -----      | -----      | -----      | -----      | -----      | -----      | -----      | -----      |
| Mus_musculus_NR_046233      | -----      | -----      | -----      | -----      | -----      | -----       | -----      | -----      | -----      | -----      | -----      | -----      | -----      | -----      |
| Homo_sapiens_U13369         | -----      | -----      | -----      | -----      | -----      | -----       | -----      | -----      | -----      | -----      | -----      | -----      | -----      | -----      |
| Rattus_norvegicus_NR_046239 | -----      | -----      | -----      | -----      | -----      | -----       | -----      | -----      | -----      | -----      | -----      | -----      | -----      | -----      |
| Gallus_gallus_KT445934.2    | -----      | -----      | -----      | -----      | -----      | -----       | -----      | -----      | -----      | -----      | -----      | -----      | -----      | -----      |
|                             | 1111111111 | 1111111111 | 1111111111 | 1111111111 | 1111111111 | 1111111111  | 1111111111 | 1111111111 | 1111111111 | 1111111111 | 1111111111 | 1111111111 | 1111111111 | 1111111111 |
|                             | 4444444444 | 4444444444 | 4444444444 | 4444444444 | 4444444444 | 4444444444  | 4444444444 | 4444444444 | 4444444444 | 4444444444 | 4444444444 | 4444444444 | 4444444444 | 4444444444 |
|                             | 1111111112 | 2222222222 | 2222222222 | 2222222222 | 2222222222 | 2222222222  | 2222222222 | 2222222222 | 2222222222 | 2222222222 | 2222222222 | 2222222222 | 2222222223 | 2222222223 |
|                             | 9999999990 | 0000000001 | 1111111112 | 2222222223 | 3333333334 | 4444444445  | 5555555556 | 6666666667 | 7777777778 | 8888888889 | 9999999990 | 0000000001 | 1111111112 | 2222222223 |
|                             | 1234567890 | 1234567890 | 1234567890 | 1234567890 | 1234567890 | 1234567890  | 1234567890 | 1234567890 | 1234567890 | 1234567890 | 1234567890 | 1234567890 | 1234567890 | 1234567890 |
| Crocodylus_porosus_EU727191 | GTGGCCTGGA | GGCAGAAGA  | CTTCTGTCCC | CATGCCTTGT | GCTGATAGAG | GGGAGTCTCA  | GTGACCGGTG | CAAGTGGAAC | TTGAAGTTA  | GTCAGTTGGG | TGCAACATCC |            |            |            |
| Xenopus_laevis_X02995       | -----      | -----      | -----      | -----      | -----      | -----       | -----      | -----      | -----      | -----      | -----      | -----      | -----      | -----      |
| Mus_musculus_NR_046233      | -----      | -----      | -----      | -----      | -----      | -----       | -----      | -----      | -----      | -----      | -----      | -----      | -----      | -----      |
| Homo_sapiens_U13369         | -----      | -----      | -----      | -----      | -----      | -----       | -----      | -----      | -----      | -----      | -----      | -----      | -----      | -----      |
| Rattus_norvegicus_NR_046239 | -----      | -----      | -----      | -----      | -----      | -----       | -----      | -----      | -----      | -----      | -----      | -----      | -----      | -----      |
| Gallus_gallus_KT445934.2    | -----      | -----      | -----      | -----      | -----      | -----       | -----      | -----      | -----      | -----      | -----      | -----      | -----      | -----      |
|                             | 1111111111 | 1111111111 | 1111111111 | 1111111111 | 1111111111 | 1111111111  | 1111111111 | 1111111111 | 1111111111 | 1111111111 | 1111111111 | 1111111111 | 1111111111 | 1111111111 |
|                             | 4444444444 | 4444444444 | 4444444444 | 4444444444 | 4444444444 | 4444444444  | 4444444444 | 4444444444 | 4444444444 | 4444444444 | 4444444444 | 4444444444 | 4444444444 | 4444444444 |
|                             | 3333333333 | 3333333333 | 3333333333 | 3333333333 | 3333333333 | 3333333333  | 3333333333 | 3333333333 | 3333333333 | 3333333333 | 3333333333 | 3333333334 | 4444444444 | 4444444444 |
|                             | 0000000001 | 1111111112 | 2222222223 | 3333333334 | 4444444445 | 5555555556  | 6666666667 | 7777777778 | 8888888889 | 9999999990 | 0000000001 | 1111111112 | 2222222223 | 3333333334 |
|                             | 1234567890 | 1234567890 | 1234567890 | 1234567890 | 1234567890 | 1234567890  | 1234567890 | 1234567890 | 1234567890 | 1234567890 | 1234567890 | 1234567890 | 1234567890 | 1234567890 |
| Crocodylus_porosus_EU727191 | CGGCTGCATG | CCCAGAAAGG | TGGGGGGTGA | GGATCAGGAC | TACTCACCTC | CAGTTCCTGCT | GAGCATAAAG | CTAACAGAA  | CTGATGATCA | GGCAAGGCGG | GCTCACCCCA |            |            |            |
| Xenopus_laevis_X02995       | -----      | -----      | -----      | -----      | -----      | -----       | -----      | -----      | -----      | -----      | -----      | -----      | -----      | -----      |
| Mus_musculus_NR_046233      | -----      | -----      | -----      | -----      | -----      | -----       | -----      | -----      | -----      | -----      | -----      | -----      | -----      | -----      |
| Homo_sapiens_U13369         | -----      | -----      | -----      | -----      | -----      | -----       | -----      | -----      | -----      | -----      | -----      | -----      | -----      | -----      |
| Rattus_norvegicus_NR_046239 | -----      | -----      | -----      | -----      | -----      | -----       | -----      | -----      | -----      | -----      | -----      | -----      | -----      | -----      |
| Gallus_gallus_KT445934.2    | -----      | -----      | -----      | -----      | -----      | -----       | -----      | -----      | -----      | -----      | -----      | -----      | -----      | -----      |
|                             | 1111111111 | 1111111111 | 1111111111 | 1111111111 | 1111111111 | 1111111111  | 1111111111 | 1111111111 | 1111111111 | 1111111111 | 1111111111 | 1111111111 | 1111111111 | 1111111111 |
|                             | 4444444444 | 4444444444 | 4444444444 | 4444444444 | 4444444444 | 4444444444  | 4444444444 | 4444444444 | 4444444444 | 4444444444 | 4444444444 | 4444444444 | 4444444444 | 4444444444 |
|                             | 4444444444 | 4444444444 | 4444444444 | 4444444444 | 4444444444 | 4444444444  | 4444444444 | 4444444444 | 4444444444 | 4444444445 | 5555555555 | 5555555555 | 5555555555 | 5555555555 |
|                             | 1111111112 | 2222222223 | 3333333334 | 4444444445 | 5555555556 | 6666666667  | 7777777778 | 8888888889 | 9999999990 | 0000000001 | 1111111112 | 2222222223 | 3333333334 | 4444444445 |
|                             | 1234567890 | 1234567890 | 1234567890 | 1234567890 | 1234567890 | 1234567890  | 1234567890 | 1234567890 | 1234567890 | 1234567890 | 1234567890 | 1234567890 | 1234567890 | 1234567890 |
| Crocodylus_porosus_EU727191 | CTTCTGGA   | TGGCAGCCTG | GAATAATGGA | TGGTTTCTG  | CCCCCATC   | TTGTGCTCAC  | AGAGGGGAGC | CTCAGTGACC | GGTACAAGCT | AACTTGATG  | GTTAGTCAGT |            |            |            |
| Xenopus_laevis_X02995       | -----      | -----      | -----      | -----      | -----GG    | TAGCCAAATG  | CCTCGTCATC | TAATTAGTGA | CGCGCATGAA | TGGATGAACG | AGATTCCCAC |            |            |            |
| Mus_musculus_NR_046233      | -----      | -----      | -----      | -----      | -----GG    | TAGCCAAATG  | CCTCGTCATC | TAATTAGTGA | CGCGCATGAA | TGGATGAACG | AGATTCCCAC |            |            |            |
| Homo_sapiens_U13369         | -----      | -----      | -----      | -----      | -----GG    | TAGCCAAATG  | CCTCGTCATC | TAATTAGTGA | CGCGCATGAA | TGGATGAACG | AGATTCCCAC |            |            |            |
| Rattus_norvegicus_NR_046239 | -----      | -----      | -----      | -----      | -----GG    | TAGCCAAATG  | CCTCGTCATC | TAATTAGTGA | CGCGCATGAA | TGGATGAACG | AGATTCCCAC |            |            |            |
| Gallus_gallus_KT445934.2    | -----      | -----      | -----      | -----      | -----GG    | TAGCCAAATG  | CCTCGTCATC | TAATTAGTGA | CGCGCATGAA | TGGATGAACG | AGATTCCCAC |            |            |            |









|                             |             |            |             |            |            |             |            |            |            |            |             |             |             |
|-----------------------------|-------------|------------|-------------|------------|------------|-------------|------------|------------|------------|------------|-------------|-------------|-------------|
| Crocodylus_porosus_EU727191 | 1111111111  | 1111111111 | 1111111111  | 1111111111 | 1111111111 | 1111111111  | 1111111111 | 1111111111 | 1111111111 | 1111111111 | 1111111111  | 1111111111  | 1111111111  |
| Xenopus_laevis_X02995       | 5555555555  | 5555555555 | 5555555555  | 5555555555 | 5555555555 | 5555555555  | 5555555555 | 5555555555 | 5555555555 | 5555555555 | 5555555555  | 5555555555  | 5555555555  |
| Mus_musculus_NR_046233      | 8888888888  | 8888888888 | 8888888888  | 8888888888 | 8888888888 | 8888888888  | 8888888888 | 8888888888 | 8888888888 | 8888888888 | 8888888888  | 8888888888  | 8888888888  |
| Homo_sapiens_U13369         | 4444444445  | 5555555556 | 6666666667  | 7777777778 | 8888888889 | 9999999990  | 0000000001 | 1111111112 | 2222222223 | 3333333334 | 4444444445  | 5555555556  | 6666666667  |
| Rattus_norvegicus_NR_046239 | 1234567890  | 1234567890 | 1234567890  | 1234567890 | 1234567890 | 1234567890  | 1234567890 | 1234567890 | 1234567890 | 1234567890 | 1234567890  | 1234567890  | 1234567890  |
| Gallus_gallus_KT445934.2    | -----       | -----      | -----       | -----      | -----      | -----       | -----      | -----      | -----      | -----      | -----       | -----       | -----       |
| Xenopus_laevis_X02995       | GCTCCCCTTT  | CCGCGGGGGG | GAGAGAGCGG  | CGGCGGGGCG | GGGGGAGGC  | GGCGGGCGA   | CCGCCGCCG  | CCCGGGGACC | GTCCCGTCCC | CCGGCCTCTC | CCGCAGGGAG  | CGTCGGCTCTC | CGTCGGCTCTC |
| Mus_musculus_NR_046233      | CTCGGCCCCC  | GC CGGTTC  | CCGAAACGACC | GTGTGGTGGT | TGGGGGGGGG | ATCGTCTTCT  | CCTCCGTCTC | CCGAGGACGG | TTCGTTTCTC | TTTCCCCTTC | CGTCGGCTCTC | CGTCGGCTCTC | CGTCGGCTCTC |
| Homo_sapiens_U13369         | CCCCGCCCTCT | CCCCCGCACC | CGCGCGTGGT  | GGTGGGGTGG | GGGGGAGGGC | GC GCGACCCC | GGTCGGCCCG | CCCGCTTCTT | CGGTTCCCGC | CTCCTCCCCC | TTCACGCCGG  | CGTCGGCTCTC | CGTCGGCTCTC |
| Rattus_norvegicus_NR_046239 | -----       | -----      | -----       | -----      | -----      | -----       | -----      | -----      | -----      | -----      | -----       | -----       | -----       |
| Gallus_gallus_KT445934.2    | TCCCCGCGCC  | GCTCCGTTTG | TTCTGGGTT   | CGTTCGTTTC | TTCTTCCTT  | CCTTCCCCCG  | CCCCGCGCCG | GCGCCGGCGC | GGGGTTGGAA | AGAGGGGGAG | AGGGGGGGGG  | CGTCGGCTCTC | CGTCGGCTCTC |
| Crocodylus_porosus_EU727191 | 1111111111  | 1111111111 | 1111111111  | 1111111111 | 1111111111 | 1111111111  | 1111111111 | 1111111111 | 1111111111 | 1111111111 | 1111111111  | 1111111111  | 1111111111  |
| Xenopus_laevis_X02995       | 5555555555  | 5555555555 | 5555555555  | 5555555555 | 5555555555 | 5555555556  | 6666666666 | 6666666666 | 6666666666 | 6666666666 | 6666666666  | 6666666666  | 6666666666  |
| Mus_musculus_NR_046233      | 9999999999  | 9999999999 | 9999999999  | 9999999999 | 9999999999 | 9999999990  | 0000000000 | 0000000000 | 0000000000 | 0000000000 | 0000000000  | 0000000000  | 0000000000  |
| Homo_sapiens_U13369         | 5555555556  | 6666666667 | 7777777778  | 8888888889 | 9999999990 | 0000000001  | 1111111112 | 2222222223 | 3333333334 | 4444444445 | 5555555556  | 6666666667  | 7777777778  |
| Rattus_norvegicus_NR_046239 | 1234567890  | 1234567890 | 1234567890  | 1234567890 | 1234567890 | 1234567890  | 1234567890 | 1234567890 | 1234567890 | 1234567890 | 1234567890  | 1234567890  | 1234567890  |
| Gallus_gallus_KT445934.2    | -----       | -----      | -----       | -----      | -----      | -----       | -----      | -----      | -----      | -----      | -----       | -----       | -----       |
| Xenopus_laevis_X02995       | GGGGCCGAAG  | GCCCCGCCCC | CGCACCCCCC  | CTCCCTCCCG | CC-----    | -----       | -----      | -----      | -----      | -----      | -----       | -----       | -----       |
| Mus_musculus_NR_046233      | CTTGGGTGTG  | GGAGCCTCGT | GCCGTGCGGA  | CCGCGCCCTG | CCGTGCGCTG | CCGCCGCAGC  | CCCTTGCCCT | CCGGCCTTGG | CCAAGCCGGA | GGGCGGAGGA | GGGGGATCGG  | GGGGGATCGG  | GGGGGATCGG  |
| Homo_sapiens_U13369         | GGCGGCTCGT  | CCGCTCCGGG | CCGGGACGGG  | GTCCGGGGAG | CGTGGTTTGG | GAGCCGCGGA  | GGCGCCGCGC | CGAGCCGGGC | CCCCTGGCCC | GCCGGTCCCC | GTCCCGGGGG  | GTCCCGGGGG  | GTCCCGGGGG  |
| Rattus_norvegicus_NR_046239 | -----       | -----      | -----       | -----      | -----      | -----       | -----      | -----      | -----      | -----      | -----       | -----       | -----       |
| Gallus_gallus_KT445934.2    | GGCGCGGCCG  | GCCCCCTTCC | CCGTTTCCGT  | CCCCGCGGGC | CGTGCCGTGG | GACGGGCTCC  | CTCCGTTTTC | CCCAGCCCGG | GGGGTTGACC | TGGCGGCCGG | GCGGCCGGGC  | GCGGCCGGGC  | GCGGCCGGGC  |
| Crocodylus_porosus_EU727191 | 1111111111  | 1111111111 | 1111111111  | 1111111111 | 1111111111 | 1111111111  | 1111111111 | 1111111111 | 1111111111 | 1111111111 | 1111111111  | 1111111111  | 1111111111  |
| Xenopus_laevis_X02995       | 6666666666  | 6666666666 | 6666666666  | 6666666666 | 6666666666 | 6666666666  | 6666666666 | 6666666666 | 6666666666 | 6666666666 | 6666666666  | 6666666666  | 6666666666  |
| Mus_musculus_NR_046233      | 0000000000  | 0000000000 | 0000000000  | 0000000000 | 0000000001 | 1111111111  | 1111111111 | 1111111111 | 1111111111 | 1111111111 | 1111111111  | 1111111111  | 1111111111  |
| Homo_sapiens_U13369         | 6666666667  | 7777777778 | 8888888889  | 9999999990 | 0000000001 | 1111111112  | 2222222223 | 3333333334 | 4444444445 | 5555555556 | 6666666667  | 7777777778  | 8888888889  |
| Rattus_norvegicus_NR_046239 | 1234567890  | 1234567890 | 1234567890  | 1234567890 | 1234567890 | 1234567890  | 1234567890 | 1234567890 | 1234567890 | 1234567890 | 1234567890  | 1234567890  | 1234567890  |
| Gallus_gallus_KT445934.2    | -----       | -----      | -----       | -----      | -----      | -----       | -----      | -----      | -----      | -----      | -----       | -----       | -----       |
| Xenopus_laevis_X02995       | CGGCGGCGGC  | GACCGCGGCG | CGGTGACGCA  | CGGTGGGATC | CCCATCCTCG | GCGCGTCCGT  | CGGGGACGGC | CGGTTGGAGG | GGCGGGAGGG | GTTTTTCCCG | TGAACGCCCG  | TGAACGCCCG  | TGAACGCCCG  |
| Mus_musculus_NR_046233      | TTGGCCGCGC  | GGCGCGGTGG | GGGGCCACCC  | GGGGTCCCGG | CCCTCGCG-- | -----       | -----      | -----      | -----      | -----      | -----       | -----       | -----       |
| Homo_sapiens_U13369         | -----       | -----      | -----       | -----      | -----      | -----       | -----      | -----      | -----      | -----      | -----       | -----       | -----       |
| Rattus_norvegicus_NR_046239 | -----       | -----      | -----       | -----      | -----      | -----       | -----      | -----      | -----      | -----      | -----       | -----       | -----       |
| Gallus_gallus_KT445934.2    | TAGGGGGCGC  | TCCGCGTCCC | CCTTCGGGGG  | GTTGACCTGT | CGGGCG---- | -----       | -----      | -----      | -----      | -----      | -----       | -----       | -----       |
| Crocodylus_porosus_EU727191 | 1111111111  | 1111111111 | 1111111111  | 1111111111 | 1111111111 | 1111111111  | 1111111111 | 1111111111 | 1111111111 | 1111111111 | 1111111111  | 1111111111  | 1111111111  |
| Xenopus_laevis_X02995       | 6666666666  | 6666666666 | 6666666666  | 6666666666 | 6666666666 | 6666666666  | 6666666666 | 6666666666 | 6666666666 | 6666666666 | 6666666666  | 6666666666  | 6666666666  |
| Mus_musculus_NR_046233      | 1111111111  | 1111111111 | 1111111112  | 2222222222 | 2222222222 | 2222222222  | 2222222222 | 2222222222 | 2222222222 | 2222222222 | 2222222222  | 2222222222  | 2222222222  |
| Homo_sapiens_U13369         | 7777777778  | 8888888889 | 9999999990  | 0000000001 | 1111111112 | 2222222223  | 3333333334 | 4444444445 | 5555555556 | 6666666667 | 7777777778  | 8888888889  | 9999999990  |
| Rattus_norvegicus_NR_046239 | 1234567890  | 1234567890 | 1234567890  | 1234567890 | 1234567890 | 1234567890  | 1234567890 | 1234567890 | 1234567890 | 1234567890 | 1234567890  | 1234567890  | 1234567890  |
| Gallus_gallus_KT445934.2    | -----       | -----      | -----       | -----      | -----      | -----       | -----      | -----      | -----      | -----      | -----       | -----       | -----       |
| Xenopus_laevis_X02995       | -----       | -----      | -----       | -----      | -----      | -----       | -----      | -----      | -----      | -----      | -----       | -----       | -----       |
| Mus_musculus_NR_046233      | GTTTCGGCGC  | AGGCCTCTGG | CGGCCGGGGG  | GGCGCTCTCT | CCGCCCGAGC | ATCCCCACTC  | CCGCCCTTCC | TCTTCGCGCG | CCGCGGCGGC | GACGTGCGTA | CGAGGGGAGG  | CGAGGGGAGG  | CGAGGGGAGG  |
| Homo_sapiens_U13369         | -----       | -----      | -----       | -----      | -----      | -----       | -----      | -----      | -----      | -----      | -----       | -----       | -----       |
| Rattus_norvegicus_NR_046239 | -----       | -----      | -----       | -----      | -----      | -----       | -----      | -----      | -----      | -----      | -----       | -----       | -----       |
| Gallus_gallus_KT445934.2    | -----       | -----      | -----       | -----      | -----      | -----       | -----      | -----      | -----      | -----      | -----       | -----       | -----       |
